# Supplementary material
Source: PubMed Central journal article supplement (PMC7574846)
Supplement: mmc1.pdf [file mmc1.pdf]

# THE LANCET

## Healthy Longevity

### Supplementary appendix

This appendix formed part of the original submission and has been peer reviewed. We post it as supplied by the authors.

Supplement to: Geldsetzer P, Reinmuth M, Ouma PO, et al. Mapping physical access to health care for older adults in sub-Saharan Africa and implications for the COVID-19 response: a cross-sectional analysis. *Lancet Healthy Longev* 2020; **1**: e32–42.

## Supplementary appendix

|                                                                                                                                                             |    |
|-------------------------------------------------------------------------------------------------------------------------------------------------------------|----|
| Figure S1. Distribution of travel time to the nearest hospital, by country .....                                                                            | 9  |
| Figure S2. Distribution of travel time to the nearest healthcare facility of any type, by country .....                                                     | 10 |
| Figure S3. Histogram of travel time to the nearest hospital in the MFL dataset for adults aged 60 years and older, by country .....                         | 11 |
| Figure S4. Histogram of travel time to the nearest hospital in the OSM dataset for adults aged 60 years and older, by country .....                         | 12 |
| Figure S5. Histogram of travel time to the nearest healthcare facility (of any type) in the MFL dataset for adults aged 60 years and older, by country..... | 13 |
| Figure S6. Histogram of travel time to the nearest healthcare facility (of any type) in the OSM dataset for adults aged 60 years and older, by country..... | 14 |
| Figure S7. Angola map of travel time to the nearest hospital for adults aged $\geq 60$ years .....                                                          | 15 |
| Figure S8. Benin map of travel time to the nearest hospital for adults aged $\geq 60$ years .....                                                           | 16 |
| Figure S9. Botswana map of travel time to the nearest hospital for adults aged $\geq 60$ years .....                                                        | 17 |
| Figure S10. Burkina Faso map of travel time to the nearest hospital for adults aged $\geq 60$ years.....                                                    | 18 |
| Figure S11. Burundi map of travel time to the nearest hospital for adults aged $\geq 60$ years .....                                                        | 19 |
| Figure S12. Cameroon map of travel time to the nearest hospital for adults aged $\geq 60$ years .....                                                       | 20 |
| Figure S13. Central African Republic map of travel time to the nearest hospital for adults aged $\geq 60$ years.....                                        | 21 |
| Figure S14. Chad map of travel time to the nearest hospital for adults aged $\geq 60$ years .....                                                           | 22 |
| Figure S15. Djibouti map of travel time to the nearest hospital for adults aged $\geq 60$ years .....                                                       | 23 |
| Figure S16. DRC map of travel time to the nearest hospital for adults aged $\geq 60$ years .....                                                            | 24 |
| Figure S17. Equatorial Guinea map of travel time to the nearest hospital for adults aged $\geq 60$ years.....                                               | 25 |
| Figure S18. Eritrea map of travel time to the nearest hospital for adults aged $\geq 60$ years .....                                                        | 26 |

|                                                                                                                                     |           |
|-------------------------------------------------------------------------------------------------------------------------------------|-----------|
| <b>Figure S19. eSwatini map of travel time to the nearest hospital for adults aged <math>\geq</math> 60 years .....</b>             | <b>27</b> |
| <b>Figure S20. Ethiopia map of travel time to the nearest hospital for adults aged <math>\geq</math> 60 years .....</b>             | <b>28</b> |
| <b>Figure S21. Gabon map of travel time to the nearest hospital for adults aged <math>\geq</math> 60 years .....</b>                | <b>29</b> |
| <b>Figure S22. Ghana map of travel time to the nearest hospital for adults aged <math>\geq</math> 60 years .....</b>                | <b>30</b> |
| <b>Figure S23. Guinea map of travel time to the nearest hospital for adults aged <math>\geq</math> 60 years .....</b>               | <b>31</b> |
| <b>Figure S24. Guinea-Bissau map of travel time to the nearest hospital for adults aged <math>\geq</math> 60 years.....</b>         | <b>32</b> |
| <b>Figure S25. Ivory Coast map of travel time to the nearest hospital for adults aged <math>\geq</math> 60 years .....</b>          | <b>33</b> |
| <b>Figure S26. Kenya map of travel time to the nearest hospital for adults aged <math>\geq</math> 60 years .....</b>                | <b>34</b> |
| <b>Figure S27. Lesotho map of travel time to the nearest hospital for adults aged <math>\geq</math> 60 years .....</b>              | <b>35</b> |
| <b>Figure S28. Liberia map of travel time to the nearest hospital for adults aged <math>\geq</math> 60 years .....</b>              | <b>36</b> |
| <b>Figure S29. Madagascar map of travel time to the nearest hospital for adults aged <math>\geq</math> 60 years .....</b>           | <b>37</b> |
| <b>Figure S30. Malawi map of travel time to the nearest hospital for adults aged <math>\geq</math> 60 years .....</b>               | <b>38</b> |
| <b>Figure S31. Mali map of travel time to the nearest hospital for adults aged <math>\geq</math> 60 years .....</b>                 | <b>39</b> |
| <b>Figure S32. Mauritania map of travel time to the nearest hospital for adults aged <math>\geq</math> 60 years .....</b>           | <b>40</b> |
| <b>Figure S33. Mozambique map of travel time to the nearest hospital for adults aged <math>\geq</math> 60 years .....</b>           | <b>41</b> |
| <b>Figure S34. Namibia map of travel time to the nearest hospital for adults aged <math>\geq</math> 60 years .....</b>              | <b>42</b> |
| <b>Figure S35. Niger map of travel time to the nearest hospital for adults aged <math>\geq</math> 60 years .....</b>                | <b>43</b> |
| <b>Figure S36. Nigeria map of travel time to the nearest hospital for adults aged <math>\geq</math> 60 years .....</b>              | <b>44</b> |
| <b>Figure S37. Republic of the Congo map of travel time to the nearest hospital for adults aged <math>\geq</math> 60 years.....</b> | <b>45</b> |

|                                                                                                                                               |           |
|-----------------------------------------------------------------------------------------------------------------------------------------------|-----------|
| <b>Figure S38. Rwanda map of travel time to the nearest hospital for adults aged <math>\geq 60</math> years .....</b>                         | <b>46</b> |
| <b>Figure S39. Senegal map of travel time to the nearest hospital for adults aged <math>\geq 60</math> years .....</b>                        | <b>47</b> |
| <b>Figure S40. Sierra Leone map of travel time to the nearest hospital for adults aged <math>\geq 60</math> years .....</b>                   | <b>48</b> |
| <b>Figure S41. Somalia map of travel time to the nearest hospital for adults aged <math>\geq 60</math> years .....</b>                        | <b>49</b> |
| <b>Figure S42. South Africa map of travel time to the nearest hospital for adults aged <math>\geq 60</math> years .....</b>                   | <b>50</b> |
| <b>Figure S43. South Sudan map of travel time to the nearest hospital for adults aged <math>\geq 60</math> years.....</b>                     | <b>51</b> |
| <b>Figure S44. Sudan map of travel time to the nearest hospital for adults aged <math>\geq 60</math> years .....</b>                          | <b>52</b> |
| <b>Figure S45. Tanzania map of travel time to the nearest hospital for adults aged <math>\geq 60</math> years .....</b>                       | <b>53</b> |
| <b>Figure S46. The Gambia map of travel time to the nearest hospital for adults aged <math>\geq 60</math> years .....</b>                     | <b>54</b> |
| <b>Figure S47. Togo map of travel time to the nearest hospital for adults aged <math>\geq 60</math> years .....</b>                           | <b>55</b> |
| <b>Figure S48. Uganda map of travel time to the nearest hospital for adults aged <math>\geq 60</math> years .....</b>                         | <b>56</b> |
| <b>Figure S49. Zambia map of travel time to the nearest hospital for adults aged <math>\geq 60</math> years .....</b>                         | <b>57</b> |
| <b>Figure S50. Zimbabwe map of travel time to the nearest hospital for adults aged <math>\geq 60</math> years .....</b>                       | <b>58</b> |
| <b>Figure S51. Maps of travel time to the nearest hospital for adults <math>\geq 60</math> years, by region based on the MFL dataset.....</b> | <b>59</b> |
| <b>Figure S52. Maps of travel time to the nearest hospital for adults <math>\geq 60</math> years, by region based on the OSM dataset.....</b> | <b>60</b> |
| <b>Figure S53. Angola map of travel time to the nearest healthcare facility for adults aged <math>\geq 60</math> years.....</b>               | <b>61</b> |
| <b>Figure S54. Benin map of travel time to the nearest healthcare facility for adults aged <math>\geq 60</math> years.....</b>                | <b>62</b> |
| <b>Figure S55. Botswana map of travel time to the nearest healthcare facility for adults aged <math>\geq 60</math> years.....</b>             | <b>63</b> |
| <b>Figure S56. Burkina Faso map of travel time to the nearest healthcare facility for adults aged <math>\geq 60</math> years.....</b>         | <b>64</b> |

|                                                                                                                                                   |           |
|---------------------------------------------------------------------------------------------------------------------------------------------------|-----------|
| <b>Figure S57. Burundi map of travel time to the nearest healthcare facility for adults aged <math>\geq 60</math> years.....</b>                  | <b>65</b> |
| <b>Figure S58. Cameroon map of travel time to the nearest healthcare facility for adults aged <math>\geq 60</math> years.....</b>                 | <b>66</b> |
| <b>Figure S59. Central African Republic map of travel time to the nearest healthcare facility for adults aged <math>\geq 60</math> years.....</b> | <b>67</b> |
| <b>Figure S60. Chad map of travel time to the nearest healthcare facility for adults aged <math>\geq 60</math> years.....</b>                     | <b>68</b> |
| <b>Figure S61. Djibouti map of travel time to the nearest healthcare facility for adults aged <math>\geq 60</math> years.....</b>                 | <b>69</b> |
| <b>Figure S62. DRC map of travel time to the nearest healthcare facility for adults aged <math>\geq 60</math> years.....</b>                      | <b>70</b> |
| <b>Figure S63. Equatorial Guinea map of travel time to the nearest healthcare facility for adults aged <math>\geq 60</math> years .....</b>       | <b>71</b> |
| <b>Figure S64. Eritrea map of travel time to the nearest healthcare facility for adults aged <math>\geq 60</math> years.....</b>                  | <b>72</b> |
| <b>Figure S65. eSwatini map of travel time to the nearest healthcare facility for adults aged <math>\geq 60</math> years.....</b>                 | <b>73</b> |
| <b>Figure S66. Ethiopia map of travel time to the nearest healthcare facility for adults aged <math>\geq 60</math> years.....</b>                 | <b>74</b> |
| <b>Figure S67. Gabon map of travel time to the nearest healthcare facility for adults aged <math>\geq 60</math> years.....</b>                    | <b>75</b> |
| <b>Figure S68. Ghana map of travel time to the nearest healthcare facility for adults aged <math>\geq 60</math> years.....</b>                    | <b>76</b> |
| <b>Figure S69. Guinea map of travel time to the nearest healthcare facility for adults aged <math>\geq 60</math> years.....</b>                   | <b>77</b> |
| <b>Figure S70. Guinea-Bissau map of travel time to the nearest healthcare facility for adults aged <math>\geq 60</math> years.....</b>            | <b>78</b> |
| <b>Figure S71. Ivory Coast map of travel time to the nearest healthcare facility for adults aged <math>\geq 60</math> years.....</b>              | <b>79</b> |
| <b>Figure S72. Kenya map of travel time to the nearest healthcare facility for adults aged <math>\geq 60</math> years.....</b>                    | <b>80</b> |
| <b>Figure S73. Lesotho map of travel time to the nearest healthcare facility for adults aged <math>\geq 60</math> years.....</b>                  | <b>81</b> |
| <b>Figure S74. Liberia map of travel time to the nearest healthcare facility for adults aged <math>\geq 60</math> years.....</b>                  | <b>82</b> |
| <b>Figure S75. Madagascar map of travel time to the nearest healthcare facility for adults aged <math>\geq 60</math> years.....</b>               | <b>83</b> |

|                                                                                                                                                |            |
|------------------------------------------------------------------------------------------------------------------------------------------------|------------|
| <b>Figure S76. Malawi map of travel time to the nearest healthcare facility for adults aged <math>\geq 60</math> years.....</b>                | <b>84</b>  |
| <b>Figure S77. Mali map of travel time to the nearest healthcare facility for adults aged <math>\geq 60</math> years.....</b>                  | <b>85</b>  |
| <b>Figure S78. Mauritania map of travel time to the nearest healthcare facility for adults aged <math>\geq 60</math> years.....</b>            | <b>86</b>  |
| <b>Figure S79. Mozambique map of travel time to the nearest healthcare facility for adults aged <math>\geq 60</math> years.....</b>            | <b>87</b>  |
| <b>Figure S80. Namibia map of travel time to the nearest healthcare facility for adults aged <math>\geq 60</math> years.....</b>               | <b>88</b>  |
| <b>Figure S81. Niger map of travel time to the nearest healthcare facility for adults aged <math>\geq 60</math> years.....</b>                 | <b>89</b>  |
| <b>Figure S82. Nigeria map of travel time to the nearest healthcare facility for adults aged <math>\geq 60</math> years.....</b>               | <b>90</b>  |
| <b>Figure S83. Republic of the Congo map of travel time to the nearest healthcare facility for adults aged <math>\geq 60</math> years.....</b> | <b>91</b>  |
| <b>Figure S84. Rwanda map of travel time to the nearest healthcare facility for adults aged <math>\geq 60</math> years.....</b>                | <b>92</b>  |
| <b>Figure S85. Senegal map of travel time to the nearest healthcare facility for adults aged <math>\geq 60</math> years.....</b>               | <b>93</b>  |
| <b>Figure S86. Sierra Leone map of travel time to the nearest healthcare facility for adults aged <math>\geq 60</math> years.....</b>          | <b>94</b>  |
| <b>Figure S87. Somalia map of travel time to the nearest healthcare facility for adults aged <math>\geq 60</math> years.....</b>               | <b>95</b>  |
| <b>Figure S88. South Africa map of travel time to the nearest healthcare facility for adults aged <math>\geq 60</math> years.....</b>          | <b>96</b>  |
| <b>Figure S89. South Sudan map of travel time to the nearest healthcare facility for adults aged <math>\geq 60</math> years.....</b>           | <b>97</b>  |
| <b>Figure S90. Sudan map of travel time to the nearest healthcare facility for adults aged <math>\geq 60</math> years.....</b>                 | <b>98</b>  |
| <b>Figure S91. Tanzania map of travel time to the nearest healthcare facility for adults aged <math>\geq 60</math> years.....</b>              | <b>99</b>  |
| <b>Figure S92. The Gambia map of travel time to the nearest healthcare facility for adults aged <math>\geq 60</math> years.....</b>            | <b>100</b> |
| <b>Figure S93. Togo map of travel time to the nearest healthcare facility for adults aged <math>\geq 60</math> years.....</b>                  | <b>101</b> |
| <b>Figure S94. Uganda map of travel time to the nearest healthcare facility for adults aged <math>\geq 60</math> years.....</b>                | <b>102</b> |

|                                                                                                                                                          |            |
|----------------------------------------------------------------------------------------------------------------------------------------------------------|------------|
| <b>Figure S95. Zambia map of travel time to the nearest healthcare facility for adults aged <math>\geq 60</math> years.....</b>                          | <b>103</b> |
| <b>Figure S96. Zimbabwe map of travel time to the nearest healthcare facility for adults aged <math>\geq 60</math> years.....</b>                        | <b>104</b> |
| <b>Figure S97. Maps of travel time to the nearest healthcare facility for adults <math>\geq 60</math> years, by region based on the MFL dataset.....</b> | <b>105</b> |
| <b>Figure S98. Maps of travel time to the nearest healthcare facility for adults <math>\geq 60</math> years, by region based on the OSM dataset.....</b> | <b>106</b> |
| <b>Figure S99. Location of healthcare facilities in OSM and MFL data for Angola ...</b>                                                                  | <b>107</b> |
| <b>Figure S100. Location of healthcare facilities in OSM and MFL data for Benin ...</b>                                                                  | <b>107</b> |
| <b>Figure S101. Location of healthcare facilities in OSM and MFL data for Botswana .....</b>                                                             | <b>108</b> |
| <b>Figure S102. Location of healthcare facilities in OSM and MFL data for Burkina Faso .....</b>                                                         | <b>108</b> |
| <b>Figure S103. Location of healthcare facilities in OSM and MFL data for Burundi</b>                                                                    | <b>109</b> |
| <b>Figure S104. Location of healthcare facilities in OSM and MFL data for Cameroon .....</b>                                                             | <b>109</b> |
| <b>Figure S105. Location of healthcare facilities in OSM and MFL data for Central African Republic.....</b>                                              | <b>110</b> |
| <b>Figure S106. Location of healthcare facilities in OSM and MFL data for Chad ....</b>                                                                  | <b>110</b> |
| <b>Figure S107. Location of healthcare facilities in OSM and MFL data for Djibouti</b>                                                                   | <b>111</b> |
| <b>Figure S108. Location of healthcare facilities in OSM and MFL data for DRC.....</b>                                                                   | <b>111</b> |
| <b>Figure S109. Location of healthcare facilities in OSM and MFL data for Equatorial Guinea.....</b>                                                     | <b>112</b> |
| <b>Figure S110. Location of healthcare facilities in OSM and MFL data for Eritrea..</b>                                                                  | <b>112</b> |
| <b>Figure S111. Location of healthcare facilities in OSM and MFL data for eSwatini .....</b>                                                             | <b>113</b> |
| <b>Figure S112. Location of healthcare facilities in OSM and MFL data for Ethiopia</b>                                                                   | <b>113</b> |
| <b>Figure S113. Location of healthcare facilities in OSM and MFL data for Gabon..</b>                                                                    | <b>114</b> |
| <b>Figure S114. Location of healthcare facilities in OSM and MFL data for Ghana..</b>                                                                    | <b>114</b> |
| <b>Figure S115. Location of healthcare facilities in OSM and MFL data for Guinea.</b>                                                                    | <b>115</b> |
| <b>Figure S116. Location of healthcare facilities in OSM and MFL data for Guinea-Bissau .....</b>                                                        | <b>115</b> |
| <b>Figure S117. Location of healthcare facilities in OSM and MFL data for Ivory Coast .....</b>                                                          | <b>116</b> |
| <b>Figure S118. Location of healthcare facilities in OSM and MFL data for Kenya ..</b>                                                                   | <b>116</b> |

|                                                                                                                                                          |            |
|----------------------------------------------------------------------------------------------------------------------------------------------------------|------------|
| <b>Figure S119. Location of healthcare facilities in OSM and MFL data for Lesotho</b>                                                                    | <b>117</b> |
| <b>Figure S120. Location of healthcare facilities in OSM and MFL data for Liberia .</b>                                                                  | <b>117</b> |
| <b>Figure S121. Location of healthcare facilities in OSM and MFL data for Madagascar .....</b>                                                           | <b>118</b> |
| <b>Figure S122. Location of healthcare facilities in OSM and MFL data for Malawi .</b>                                                                   | <b>118</b> |
| <b>Figure S123. Location of healthcare facilities in OSM and MFL data for Mali.....</b>                                                                  | <b>119</b> |
| <b>Figure S124. Location of healthcare facilities in OSM and MFL data for Mauritania .....</b>                                                           | <b>119</b> |
| <b>Figure S125. Location of healthcare facilities in OSM and MFL data for Mozambique .....</b>                                                           | <b>120</b> |
| <b>Figure S126. Location of healthcare facilities in OSM and MFL data for Namibia</b>                                                                    | <b>120</b> |
| <b>Figure S127. Location of healthcare facilities in OSM and MFL data for Niger ....</b>                                                                 | <b>121</b> |
| <b>Figure S128. Location of healthcare facilities in OSM and MFL data for Nigeria.</b>                                                                   | <b>121</b> |
| <b>Figure S129. Location of healthcare facilities in OSM and MFL data for Republic of the Congo.....</b>                                                 | <b>122</b> |
| <b>Figure S130. Location of healthcare facilities in OSM and MFL data for Rwanda</b>                                                                     | <b>122</b> |
| <b>Figure S131. Location of healthcare facilities in OSM and MFL data for Senegal</b>                                                                    | <b>123</b> |
| <b>Figure S132. Location of healthcare facilities in OSM and MFL data for Sierra Leone.....</b>                                                          | <b>123</b> |
| <b>Figure S133. Location of healthcare facilities in OSM and MFL data for Somalia</b>                                                                    | <b>124</b> |
| <b>Figure S134. Location of healthcare facilities in OSM and MFL data for South Africa .....</b>                                                         | <b>124</b> |
| <b>Figure S135. Location of healthcare facilities in OSM and MFL data for South Sudan .....</b>                                                          | <b>125</b> |
| <b>Figure S136. Location of healthcare facilities in OSM and MFL data for Sudan ..</b>                                                                   | <b>125</b> |
| <b>Figure S137. Location of healthcare facilities in OSM and MFL data for Tanzania .....</b>                                                             | <b>126</b> |
| <b>Figure S138. Location of healthcare facilities in OSM and MFL data for The Gambia.....</b>                                                            | <b>126</b> |
| <b>Figure S139. Location of healthcare facilities in OSM and MFL data for Togo.....</b>                                                                  | <b>127</b> |
| <b>Figure S140. Location of healthcare facilities in OSM and MFL data for Uganda</b>                                                                     | <b>127</b> |
| <b>Figure S141. Location of healthcare facilities in OSM and MFL data for Zambia</b>                                                                     | <b>128</b> |
| <b>Figure S142. Location of healthcare facilities in OSM and MFL data for Zimbabwe .....</b>                                                             | <b>128</b> |
| <b>Table S1. Overlap of the GPS location of healthcare facilities with a building footprint and settlement locations in Bing satellite imagery .....</b> | <b>129</b> |



|                                                                                                                                                       |            |
|-------------------------------------------------------------------------------------------------------------------------------------------------------|------------|
| <b>Table S2. Travel time estimates from OpenRouteService versus Google Maps for each of 40 randomly selected locations in sub-Saharan Africa.....</b> | <b>130</b> |
| <b>Table S3. Jaccard Index for OSM primary care facilities and MFL primary care facilities<sup>1</sup> .....</b>                                      | <b>132</b> |
| <b>Table S4. Jaccard Index for OSM hospitals and MFL hospitals<sup>1</sup> .....</b>                                                                  | <b>134</b> |
| <b>Table S5. Jaccard Index for OSM primary care facilities and MFL hospitals<sup>1</sup> .....</b>                                                    | <b>136</b> |
| <b>Table S6. Jaccard Index for OSM hospitals and MFL primary care facilities<sup>1</sup> .....</b>                                                    | <b>138</b> |

**Figure S1. Distribution of travel time to the nearest hospital, by country**

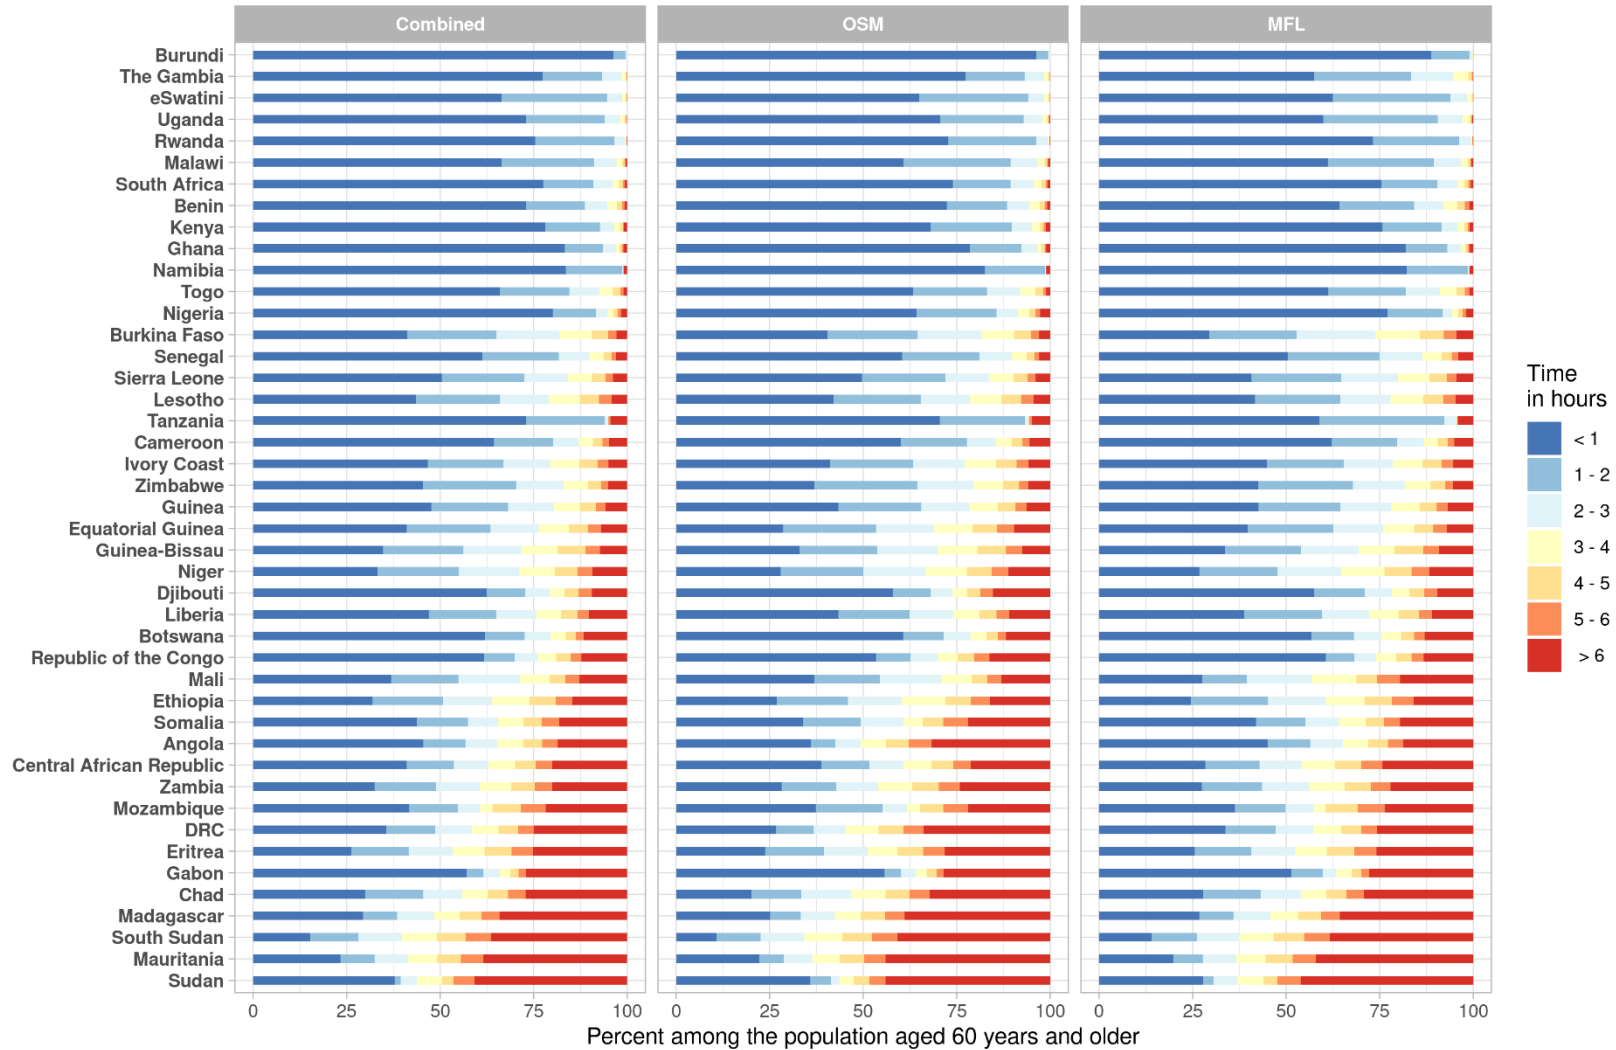

Abbreviations: DRC=Democratic Republic of the Congo

“Combined” refers to the travel time to the nearest hospital regardless of whether the hospital was recorded in the MFL or OSM data.

**Figure S2. Distribution of travel time to the nearest healthcare facility of any type, by country**

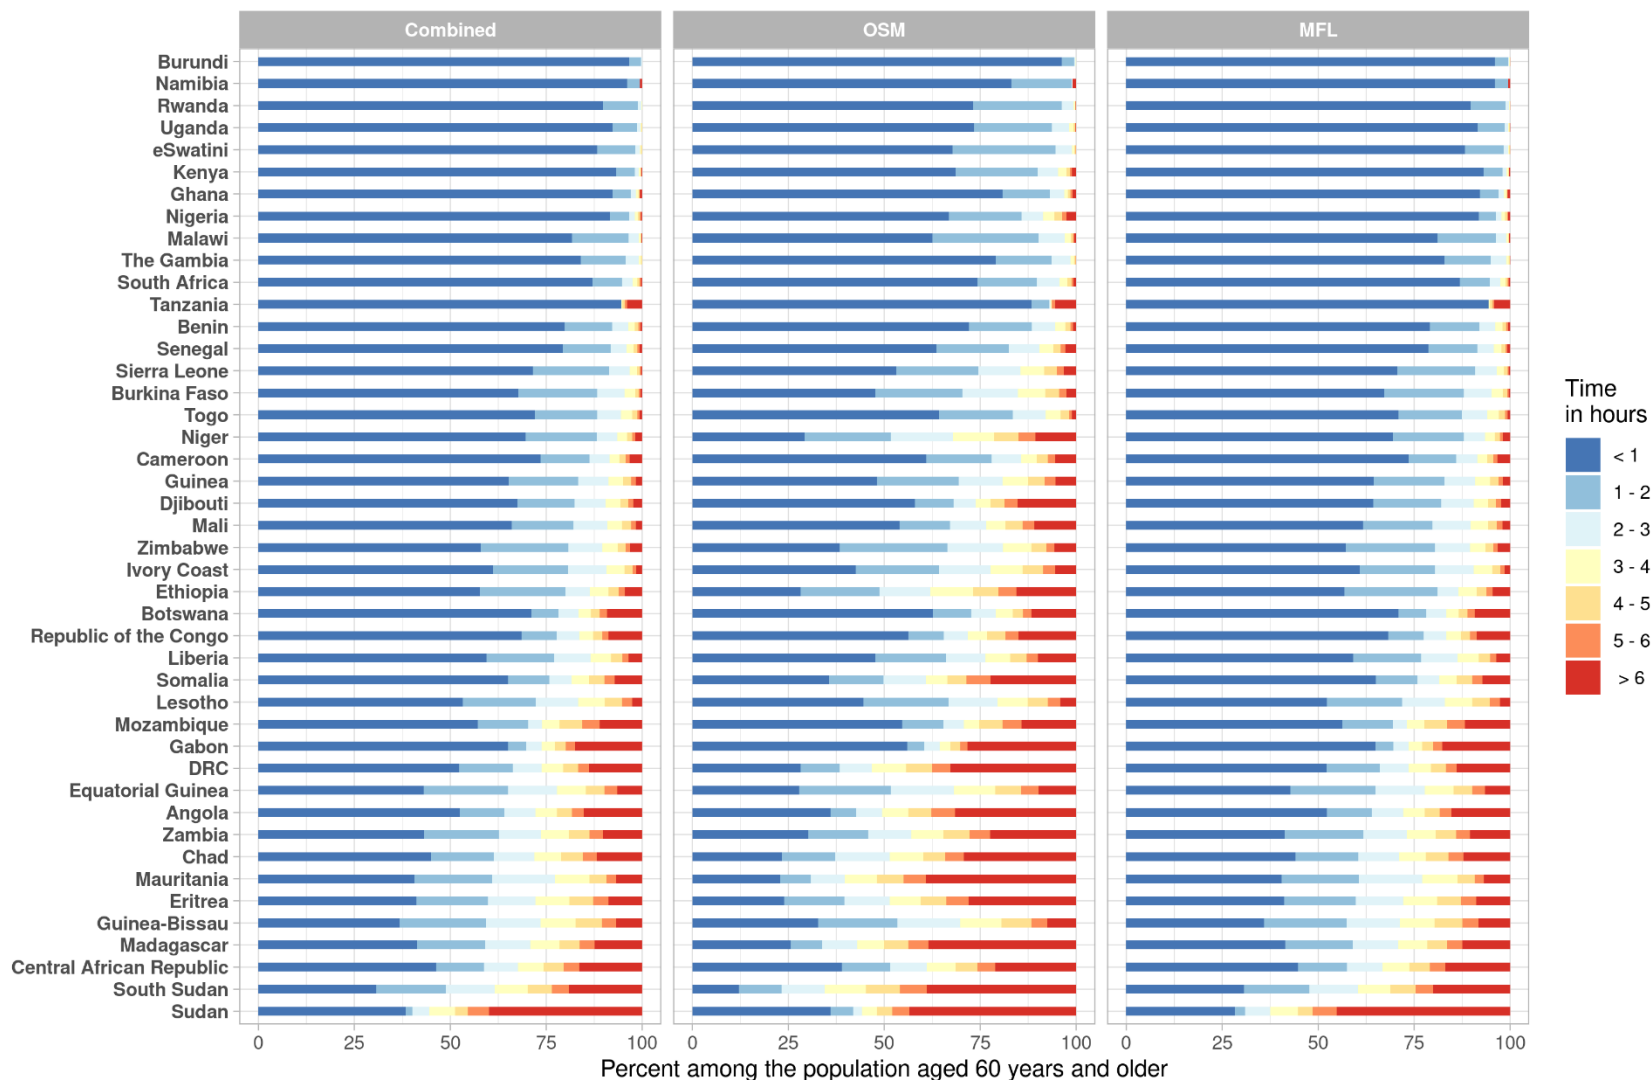

Abbreviations: DRC=Democratic Republic of the Congo

“Combined” refers to the travel time to the nearest healthcare facility regardless of whether the facility was recorded in the MFL or OSM data.

**Figure S3. Histogram of travel time to the nearest hospital in the MFL dataset for adults aged 60 years and older, by country<sup>1</sup>**

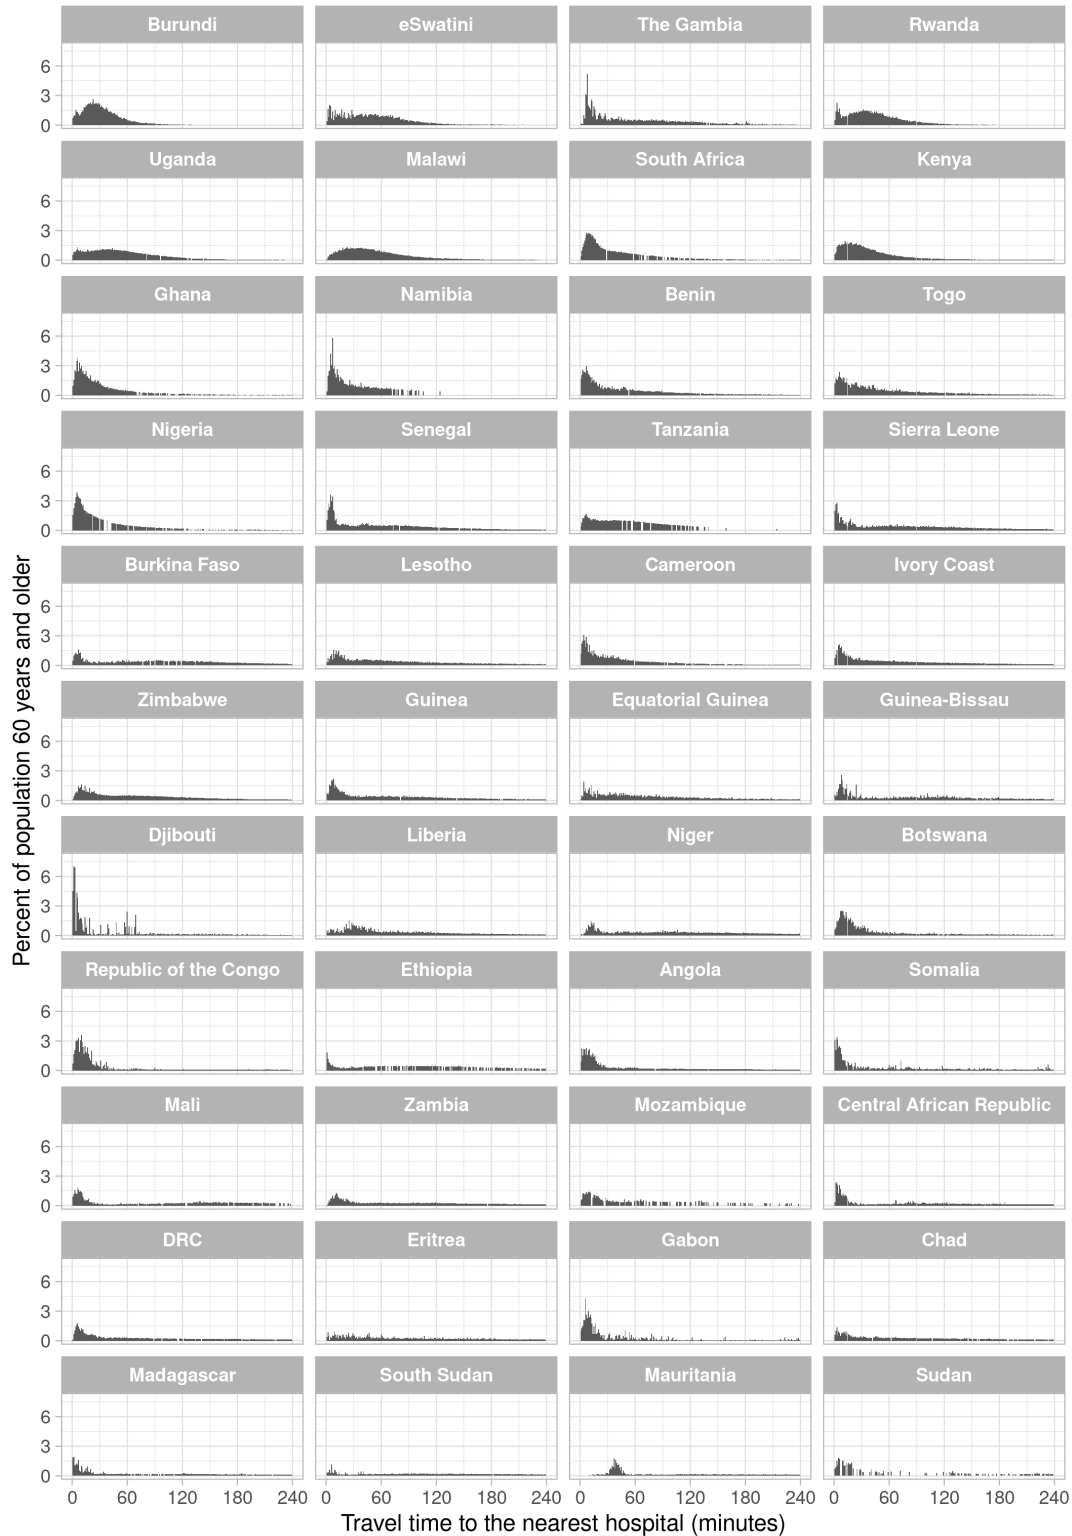

Abbreviations: DRC=Democratic Republic of the Congo

<sup>1</sup> Countries were ordered in ascending order by the proportion of adults aged 60 years and older in their population who reside in a 1km x 1km area that has an estimated travel time >2 hours to the nearest hospital.

**Figure S4. Histogram of travel time to the nearest hospital in the OSM dataset for adults aged 60 years and older, by country<sup>1</sup>**

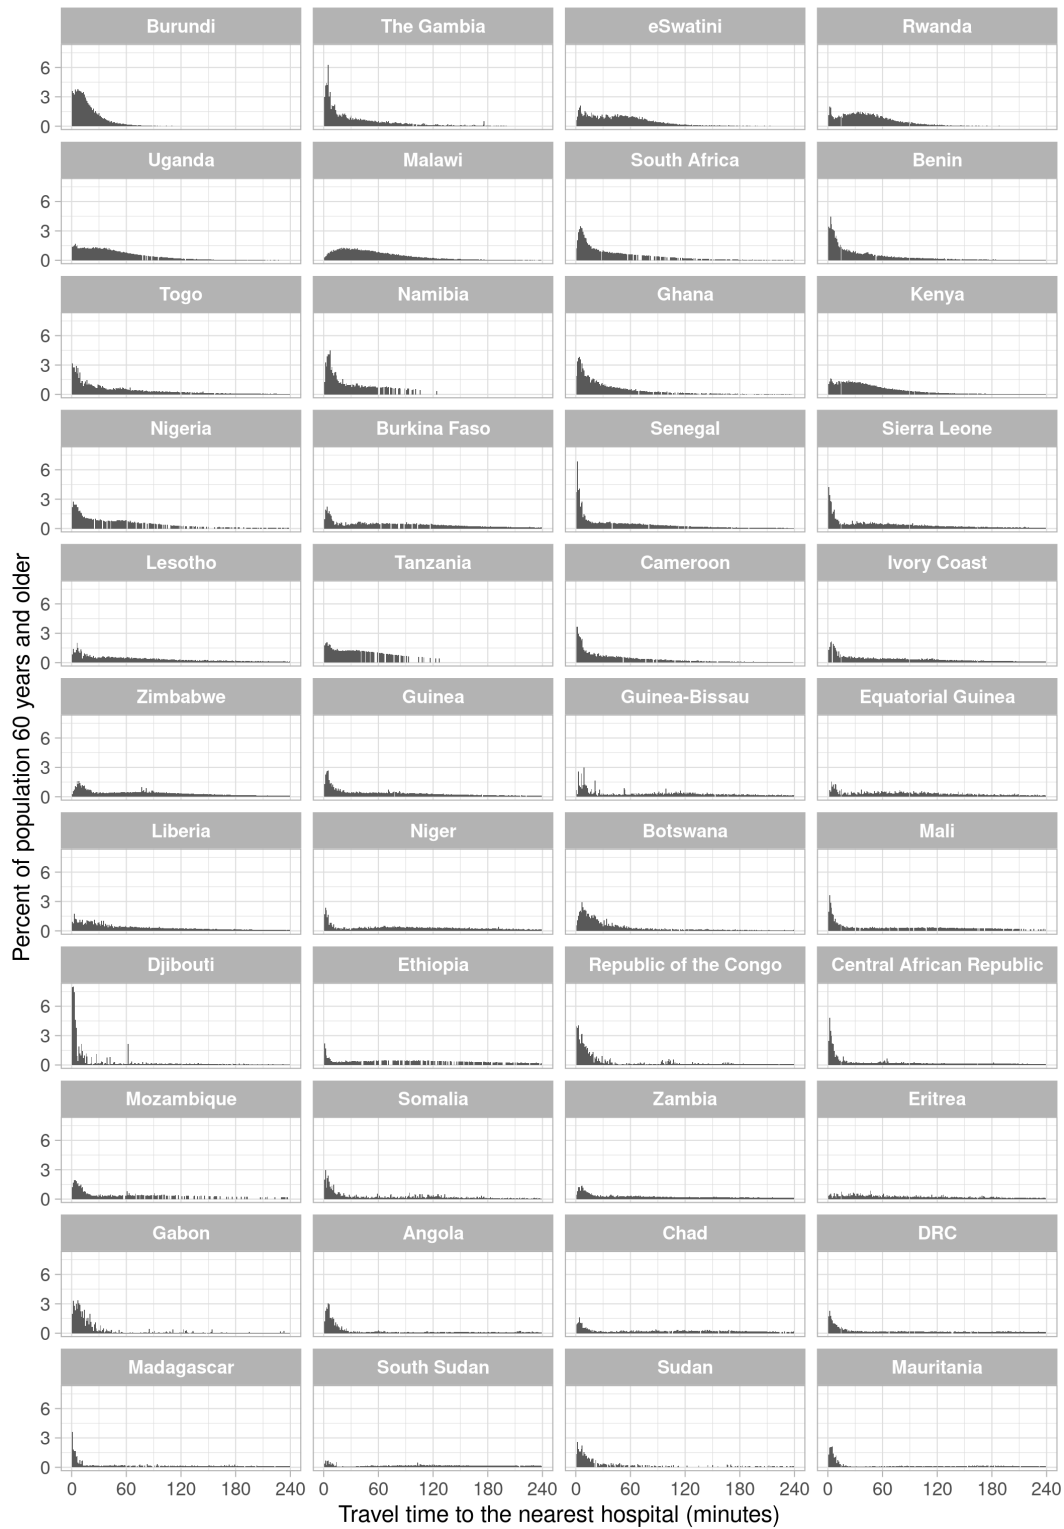

Abbreviations: DRC=Democratic Republic of the Congo

<sup>1</sup> Countries were ordered in ascending order by the proportion of adults aged 60 years and older in their population who reside in a 1km x 1km area that has an estimated travel time >2 hours to the nearest hospital.

**Figure S5. Histogram of travel time to the nearest healthcare facility (of any type) in the MFL dataset for adults aged 60 years and older, by country<sup>1</sup>**

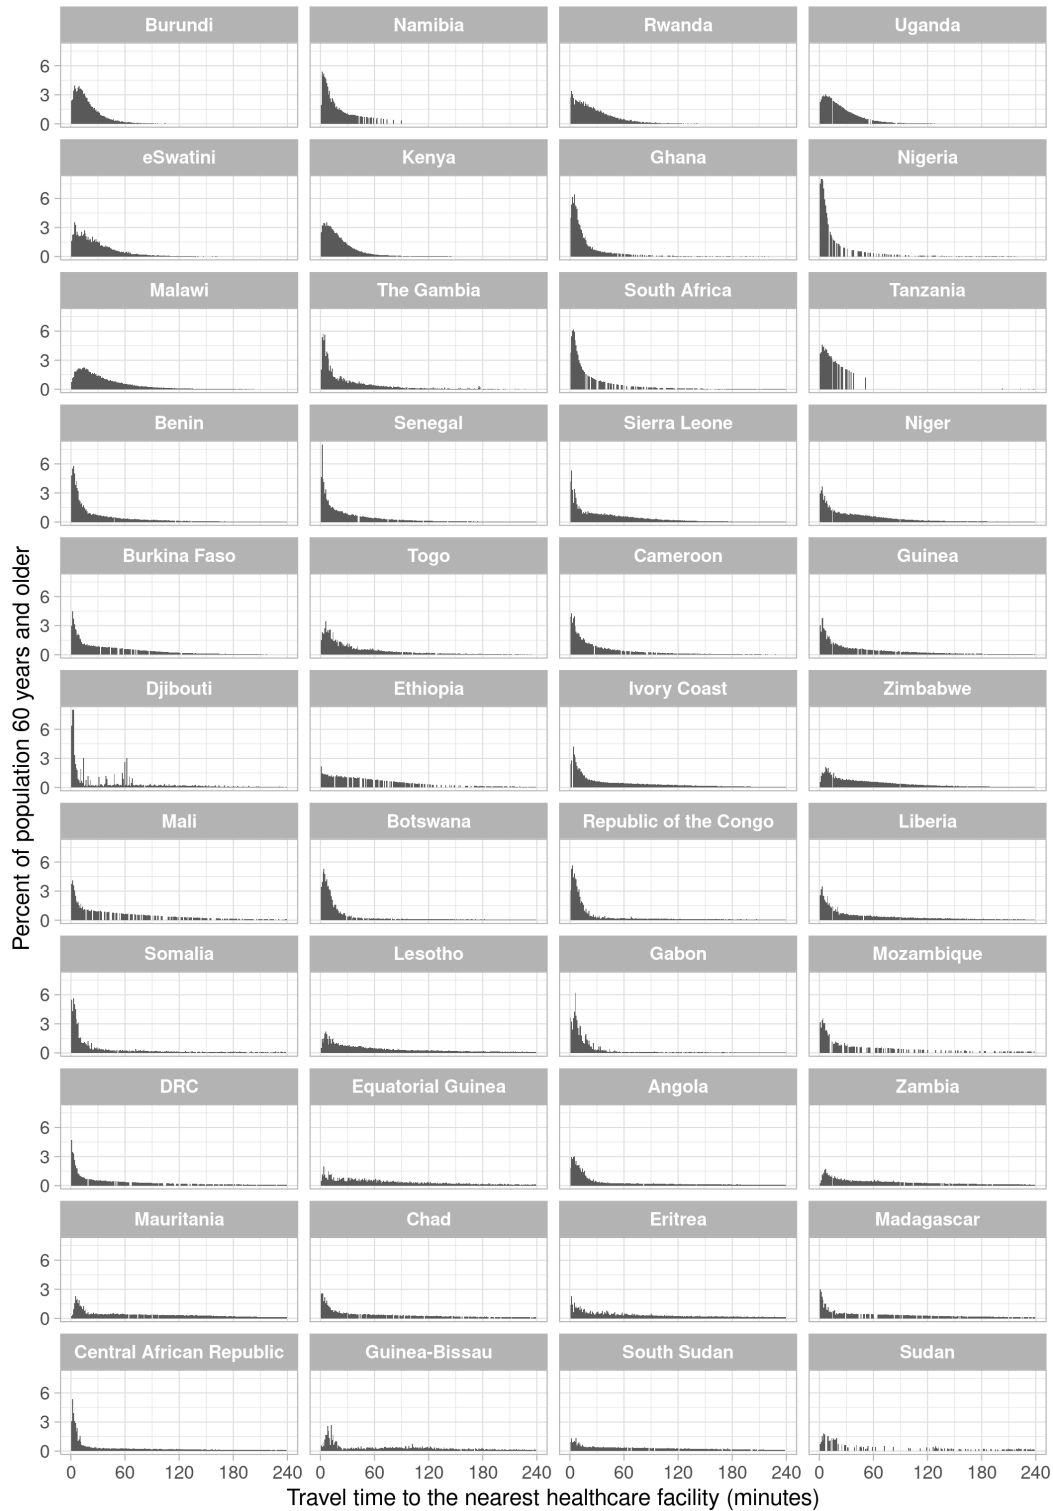

Abbreviations: DRC=Democratic Republic of the Congo

<sup>1</sup> Countries were ordered in ascending order by the proportion of adults aged 60 years and older in their population who reside in a 1km x 1km area that has an estimated travel time >2 hours to the nearest healthcare facility.

**Figure S6. Histogram of travel time to the nearest healthcare facility (of any type) in the OSM dataset for adults aged 60 years and older, by country<sup>1</sup>**

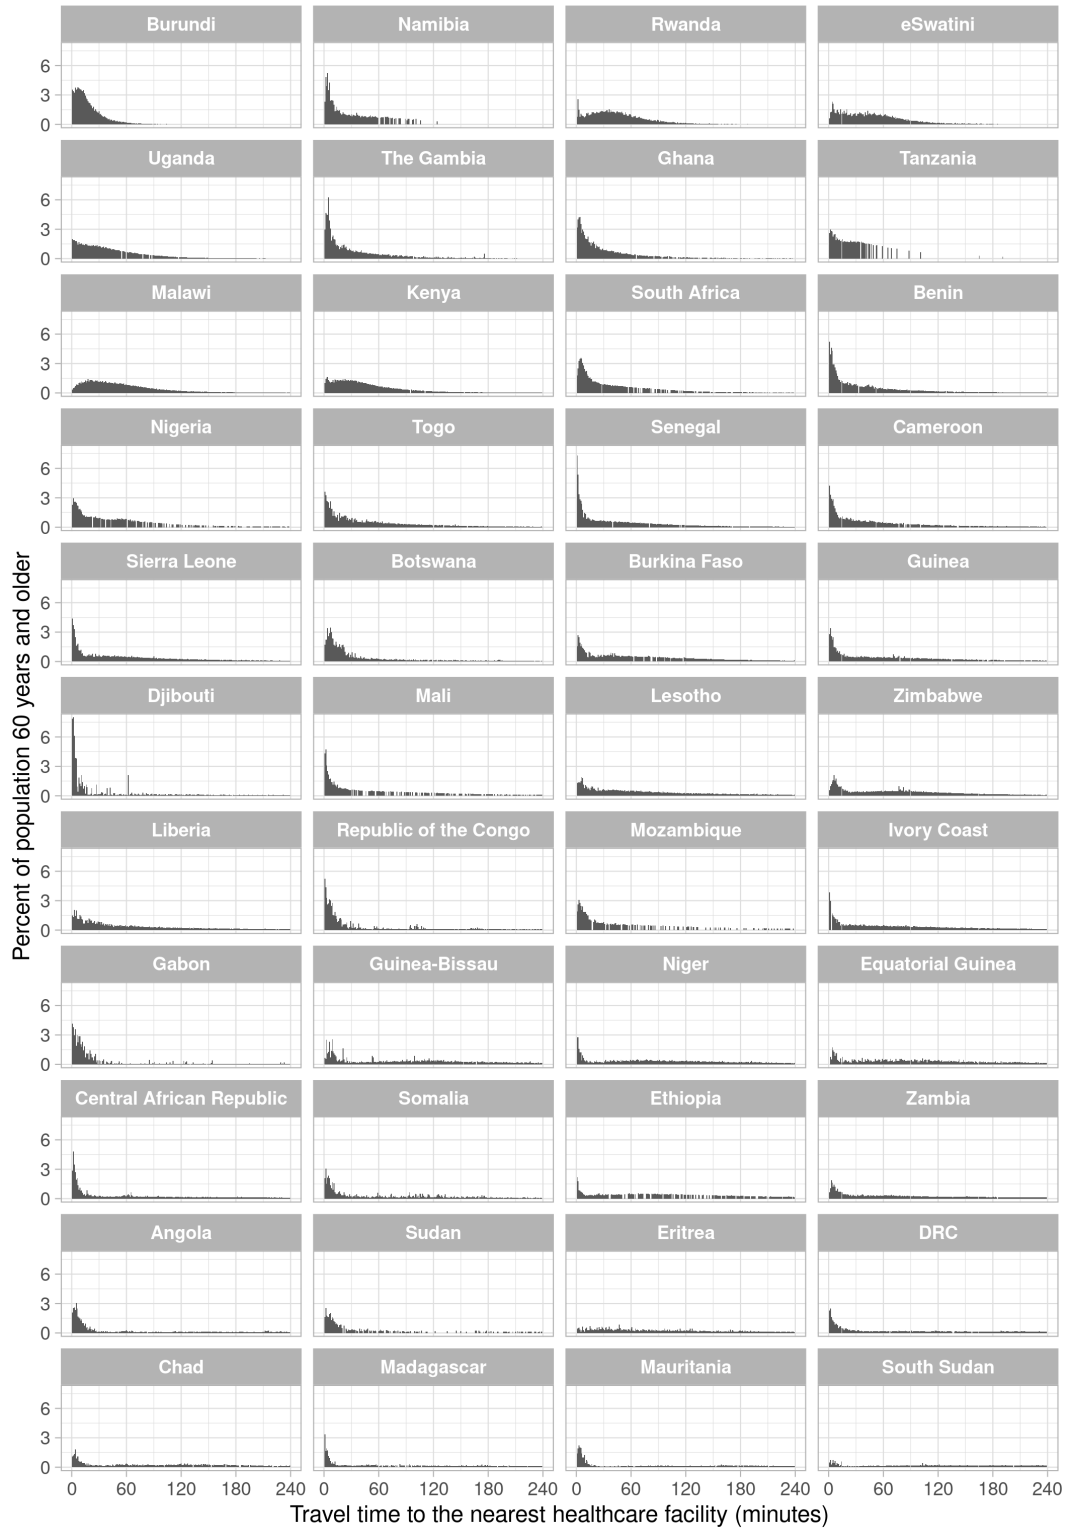

Abbreviations: DRC=Democratic Republic of the Congo

<sup>1</sup> Countries were ordered in ascending order by the proportion of adults aged 60 years and older in their population who reside in a 1km x 1km area that has an estimated travel time >2 hours to the nearest healthcare facility.

**Figure S7. Angola map of travel time to the nearest hospital for adults aged  $\geq 60$  years**

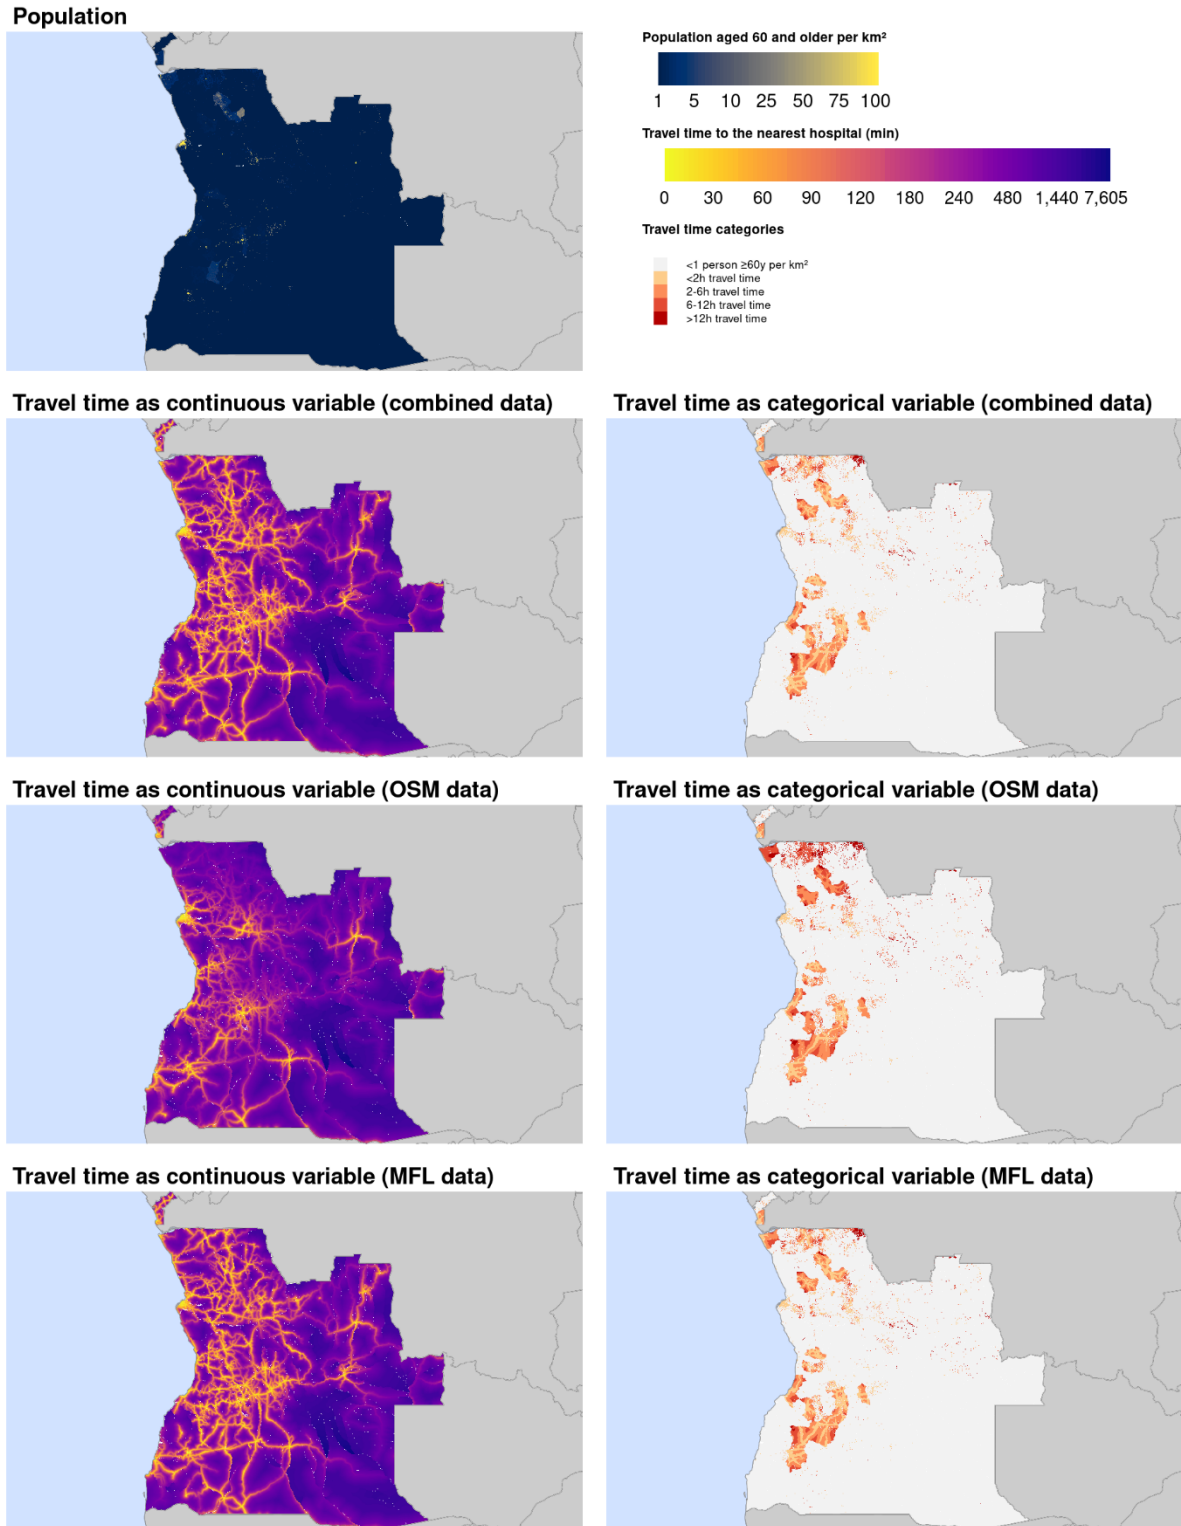



**Figure S8. Benin map of travel time to the nearest hospital for adults aged  $\geq 60$  years**

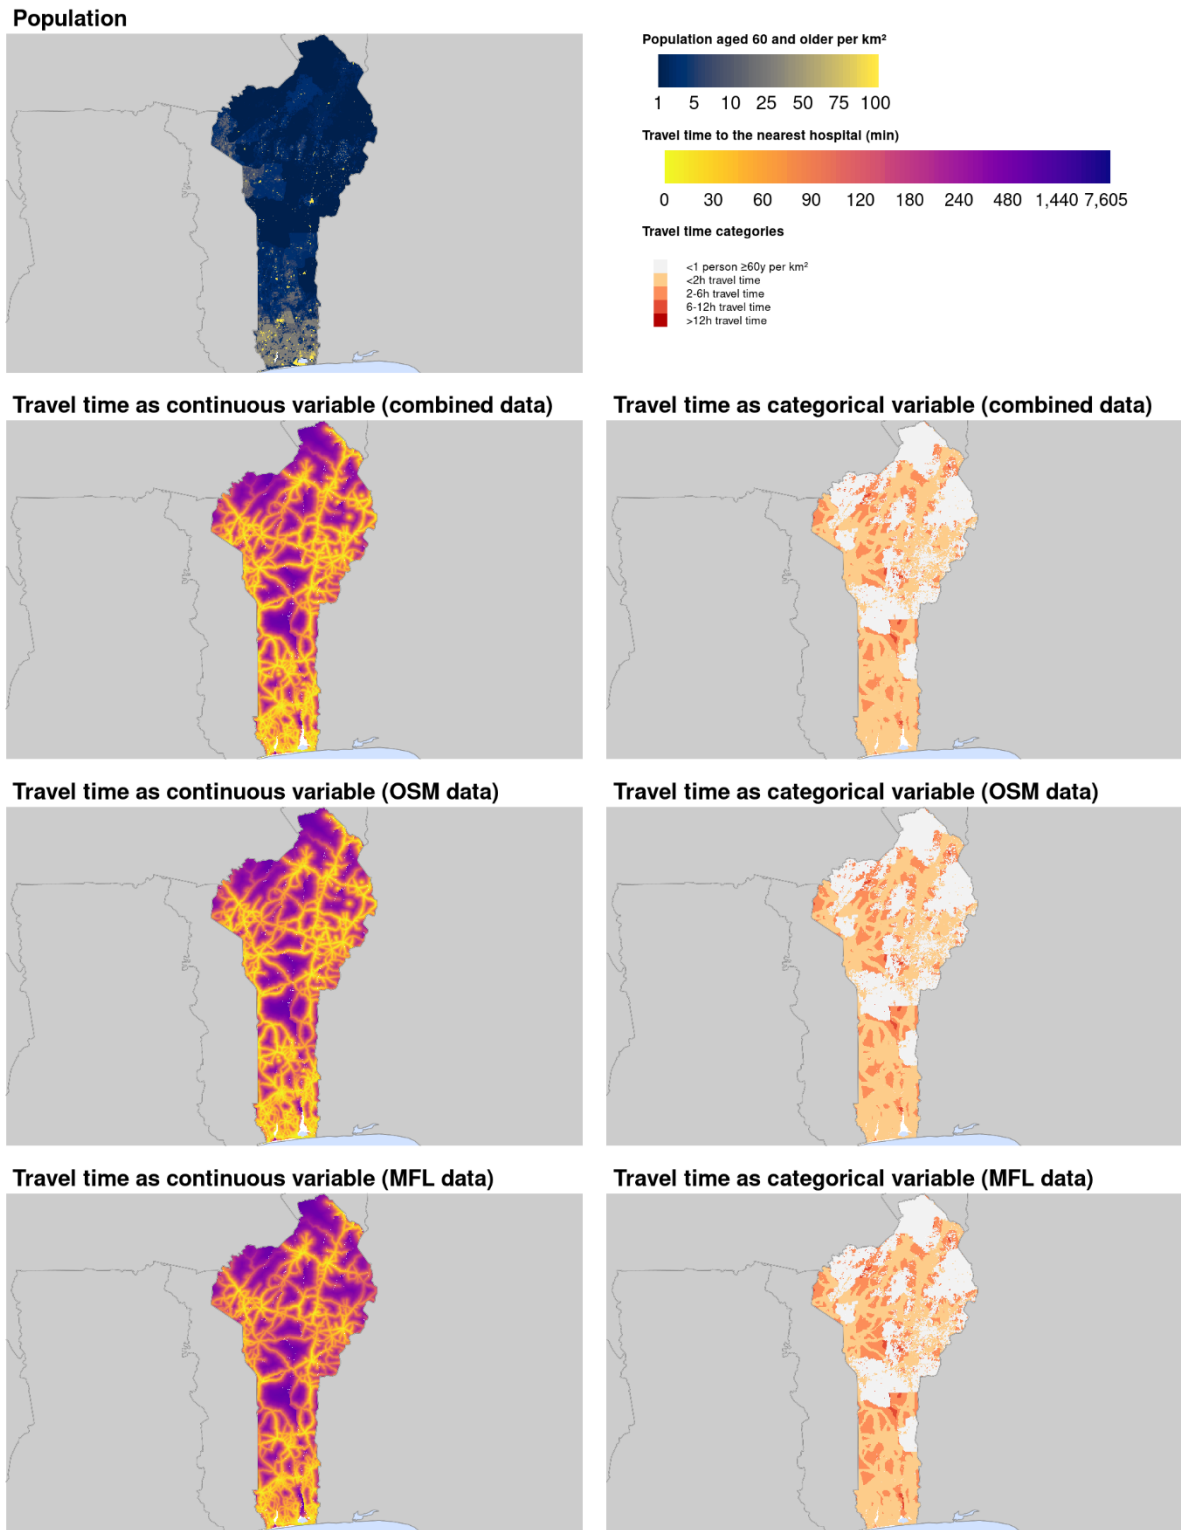

**Figure S9. Botswana map of travel time to the nearest hospital for adults aged  $\geq 60$  years**

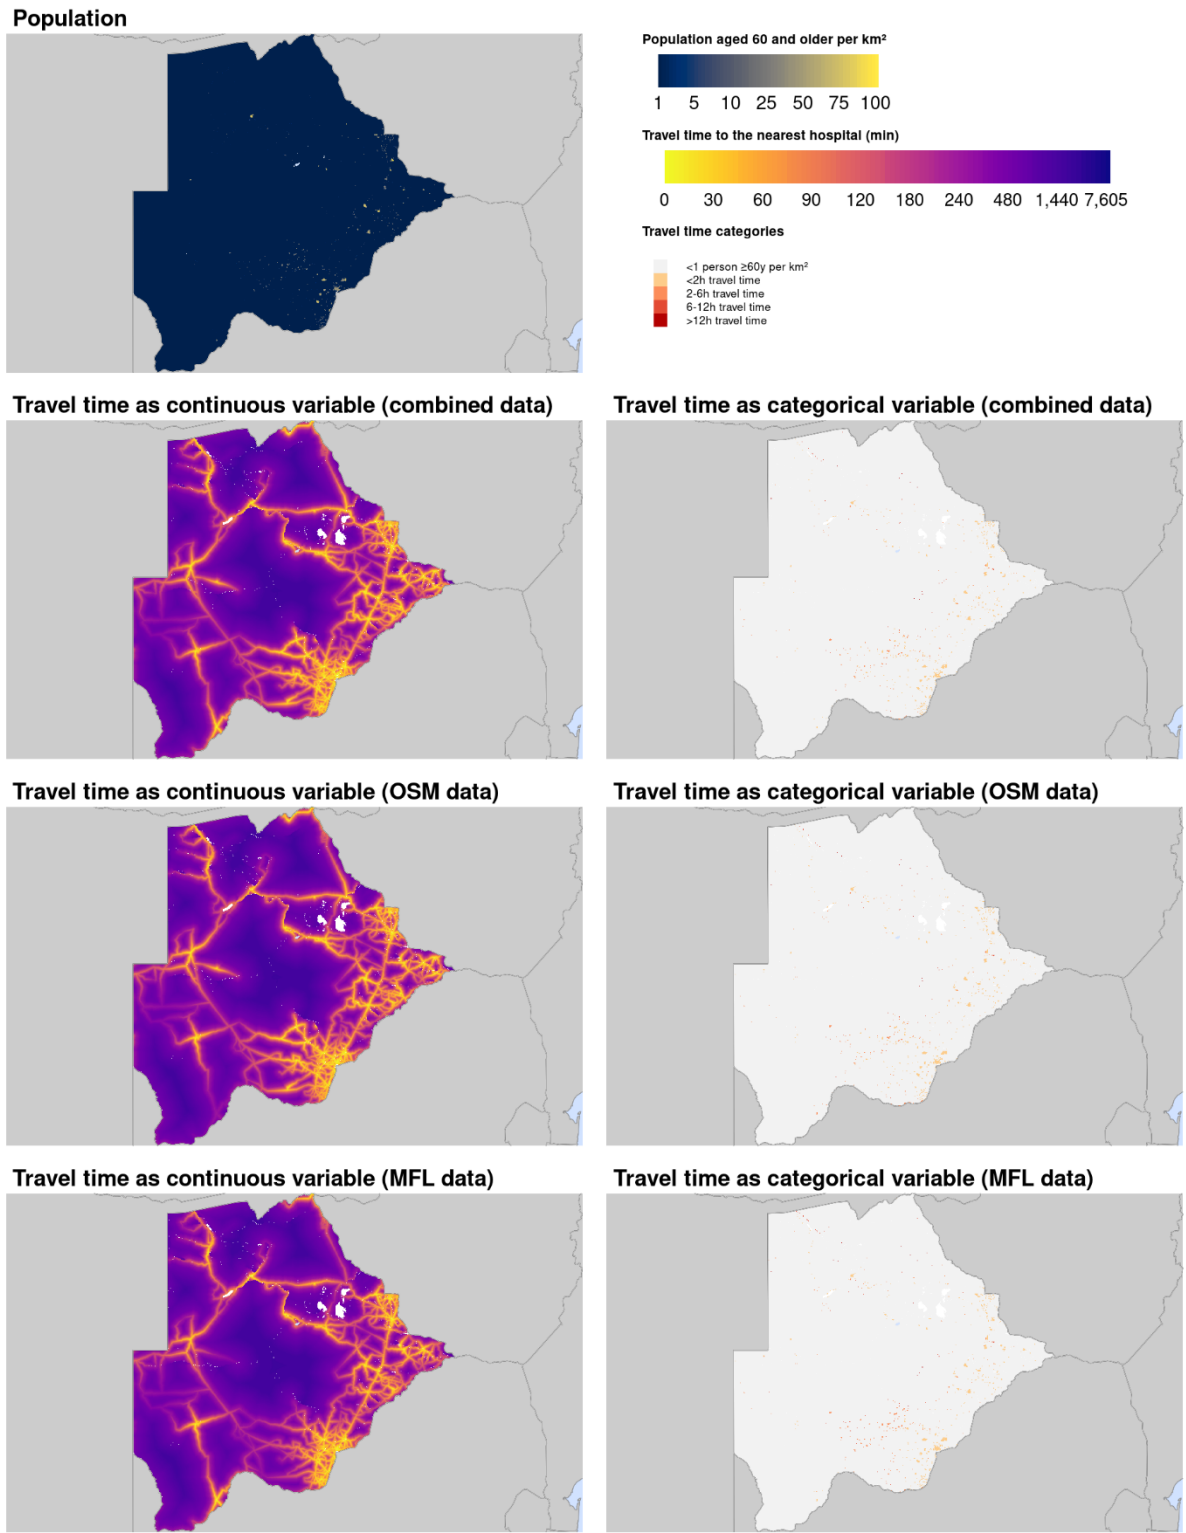

**Figure S10. Burkina Faso map of travel time to the nearest hospital for adults aged  $\geq 60$  years**

**Population**

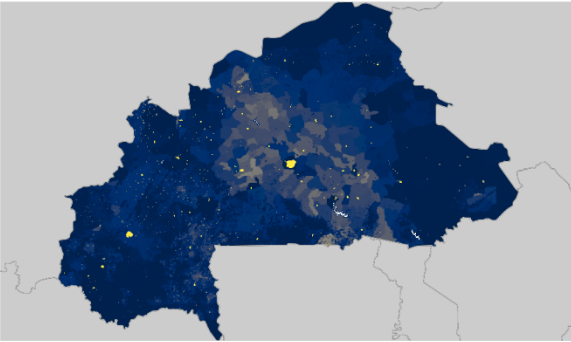

Population aged 60 and older per km<sup>2</sup>

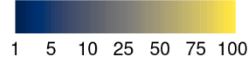

Travel time to the nearest hospital (min)

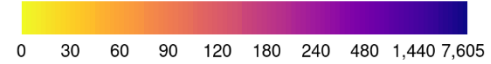

Travel time categories

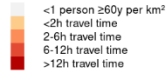

**Travel time as continuous variable (combined data)**

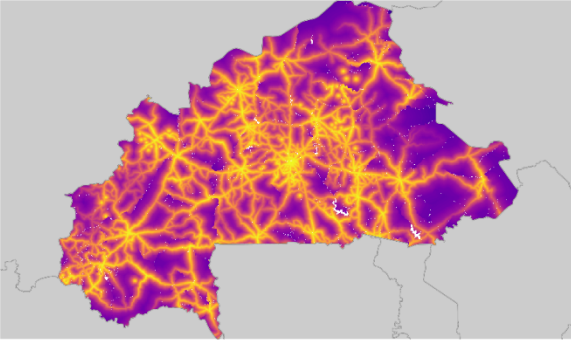

**Travel time as categorical variable (combined data)**

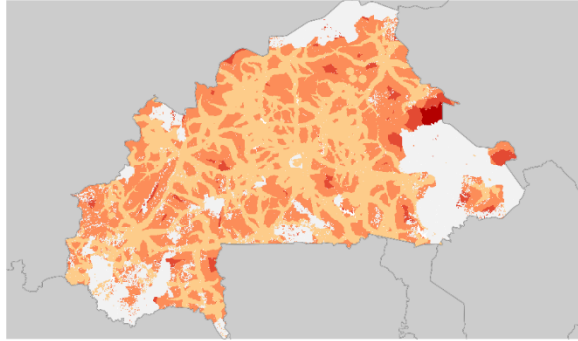

**Travel time as continuous variable (OSM data)**

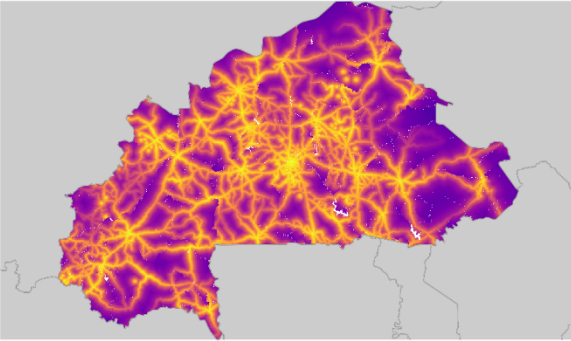

**Travel time as categorical variable (OSM data)**

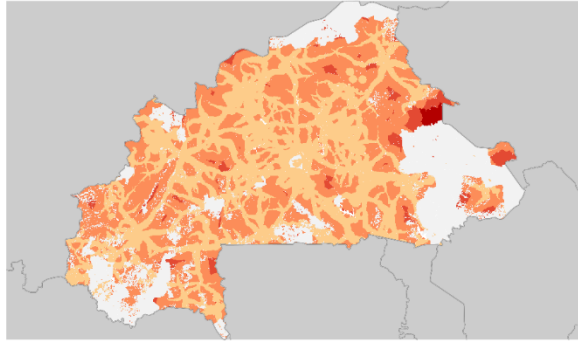

**Travel time as continuous variable (MFL data)**

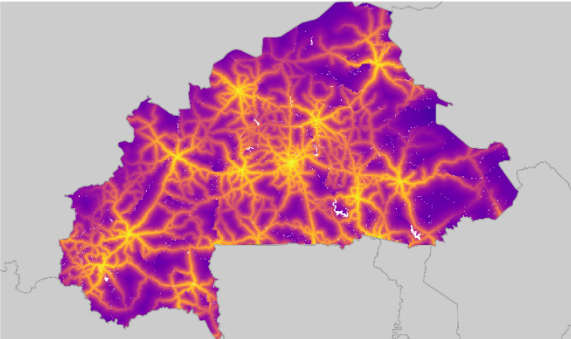

**Travel time as categorical variable (MFL data)**

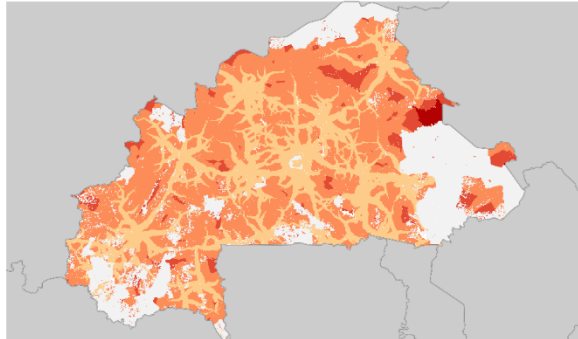

**Figure S11. Burundi map of travel time to the nearest hospital for adults aged  $\geq 60$  years**

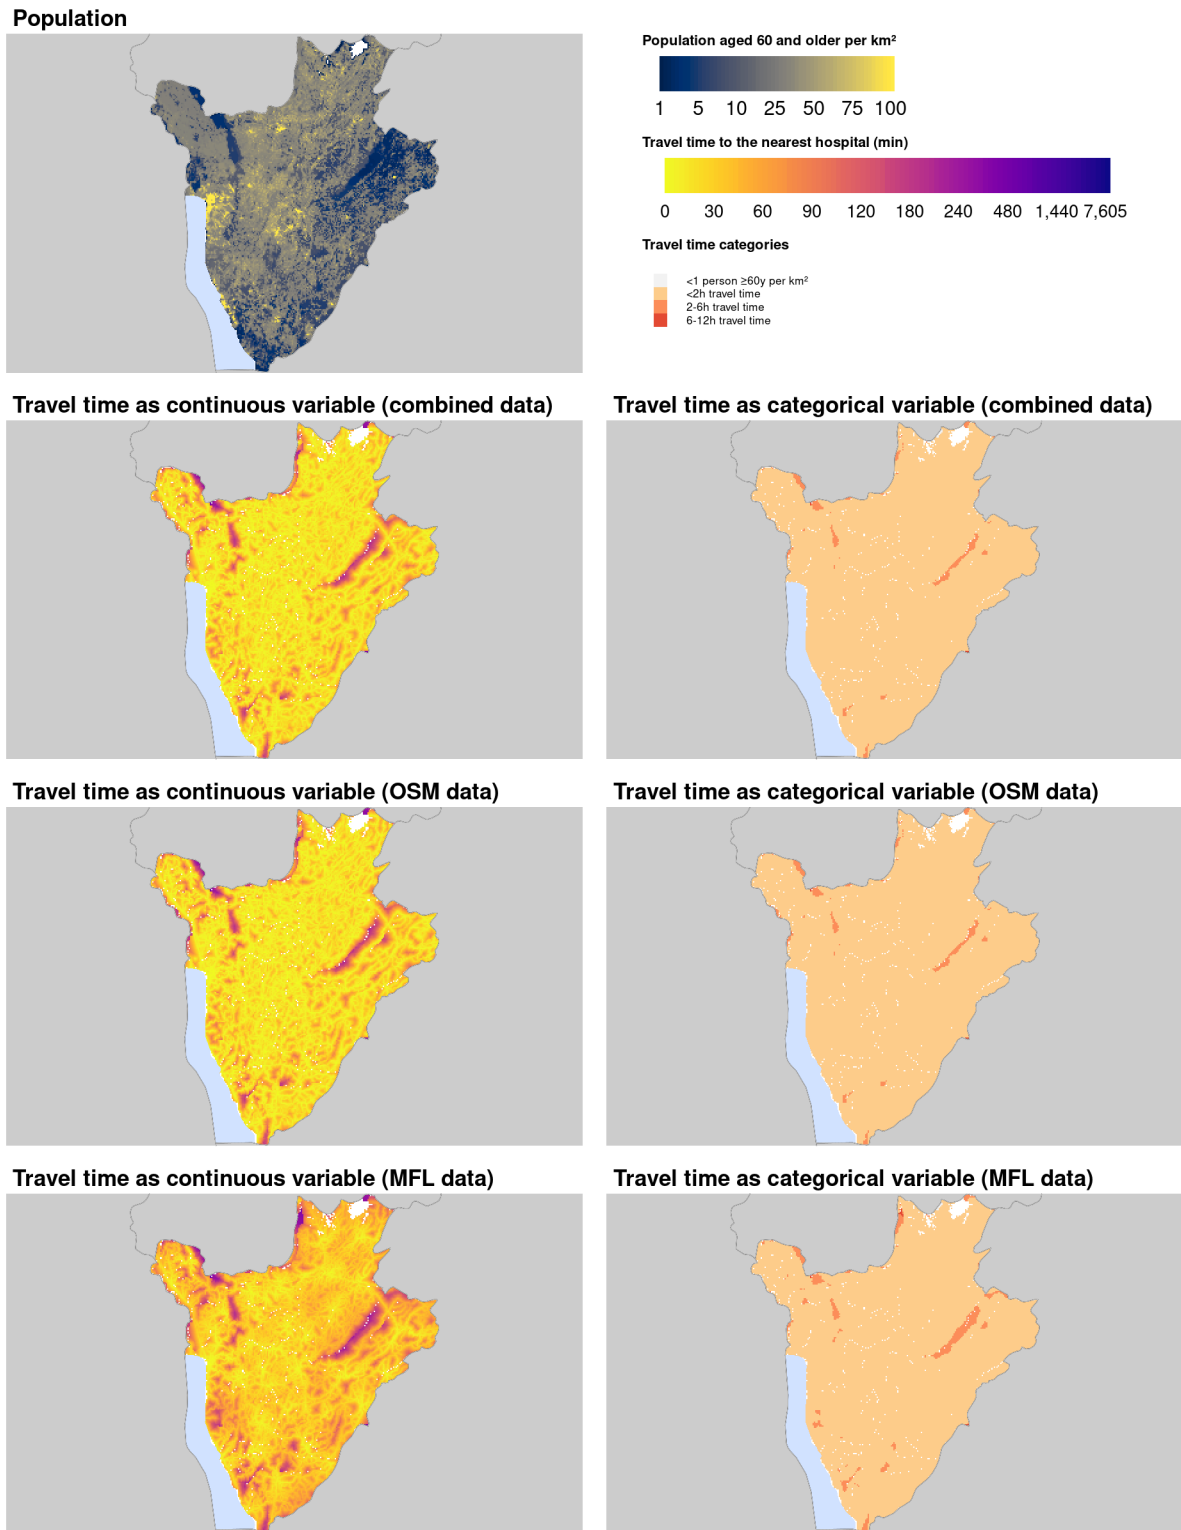

**Figure S12. Cameroon map of travel time to the nearest hospital for adults aged  $\geq 60$  years**

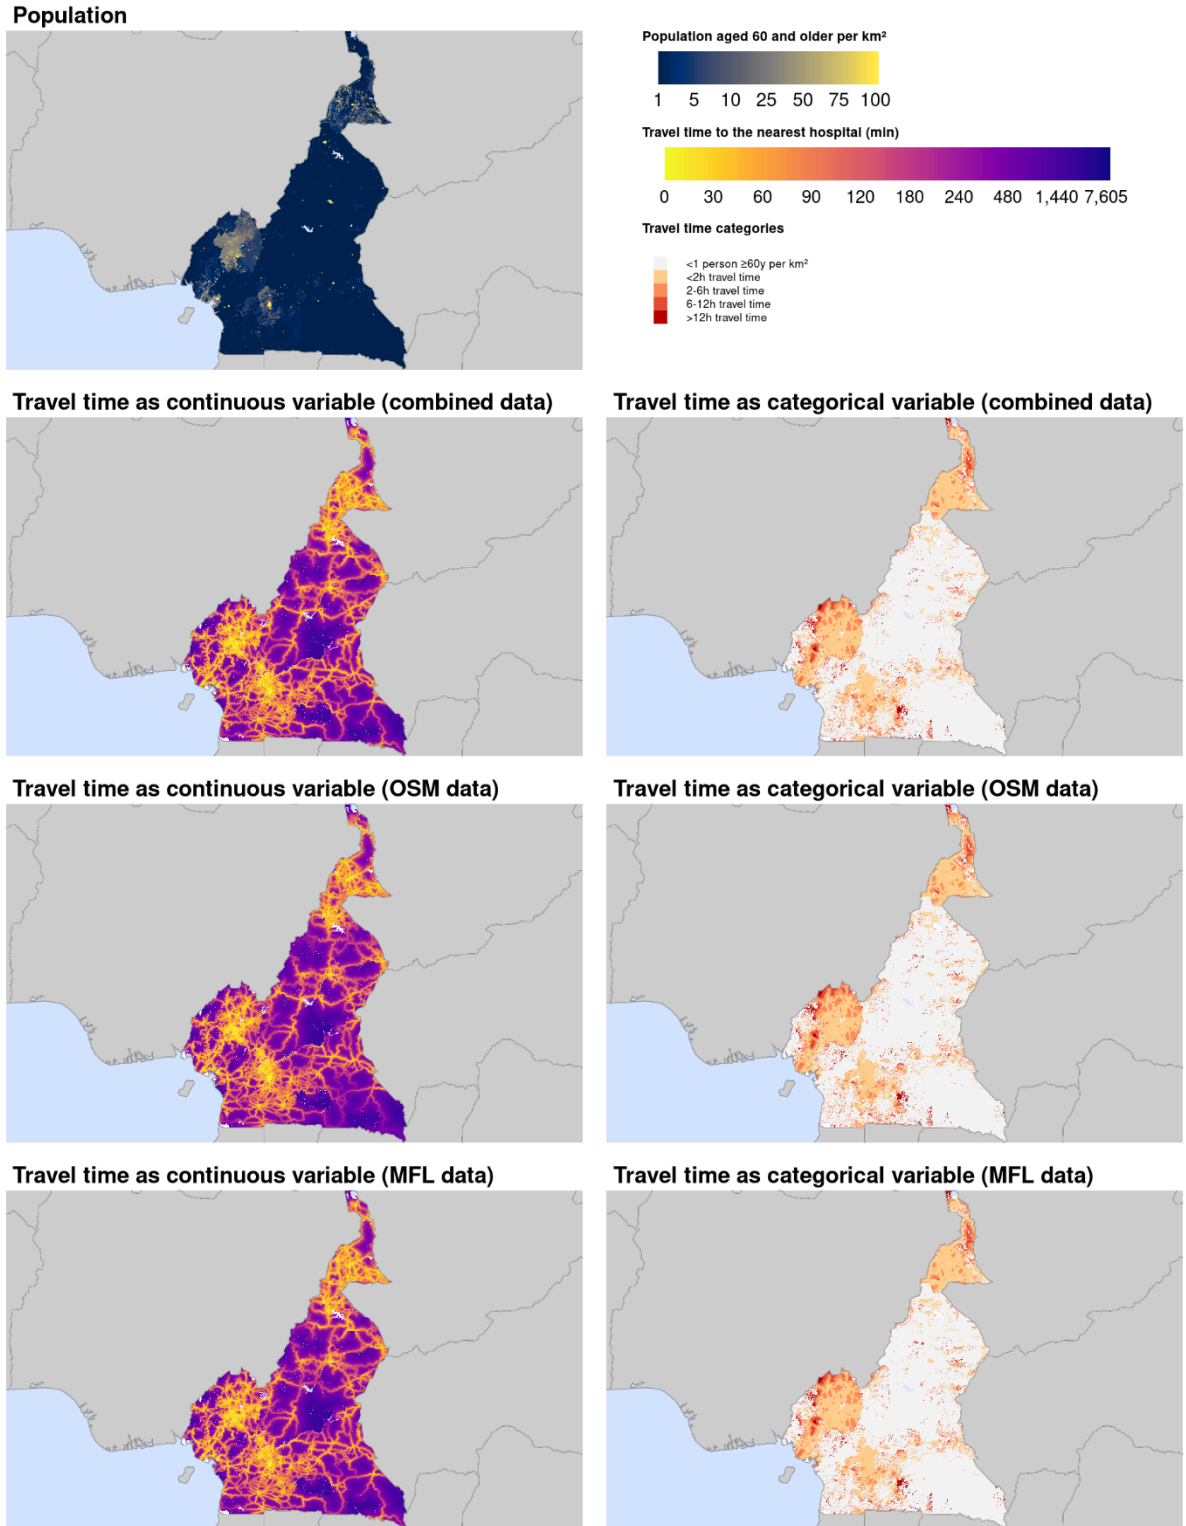

**Figure S13. Central African Republic map of travel time to the nearest hospital for adults aged  $\geq 60$  years**

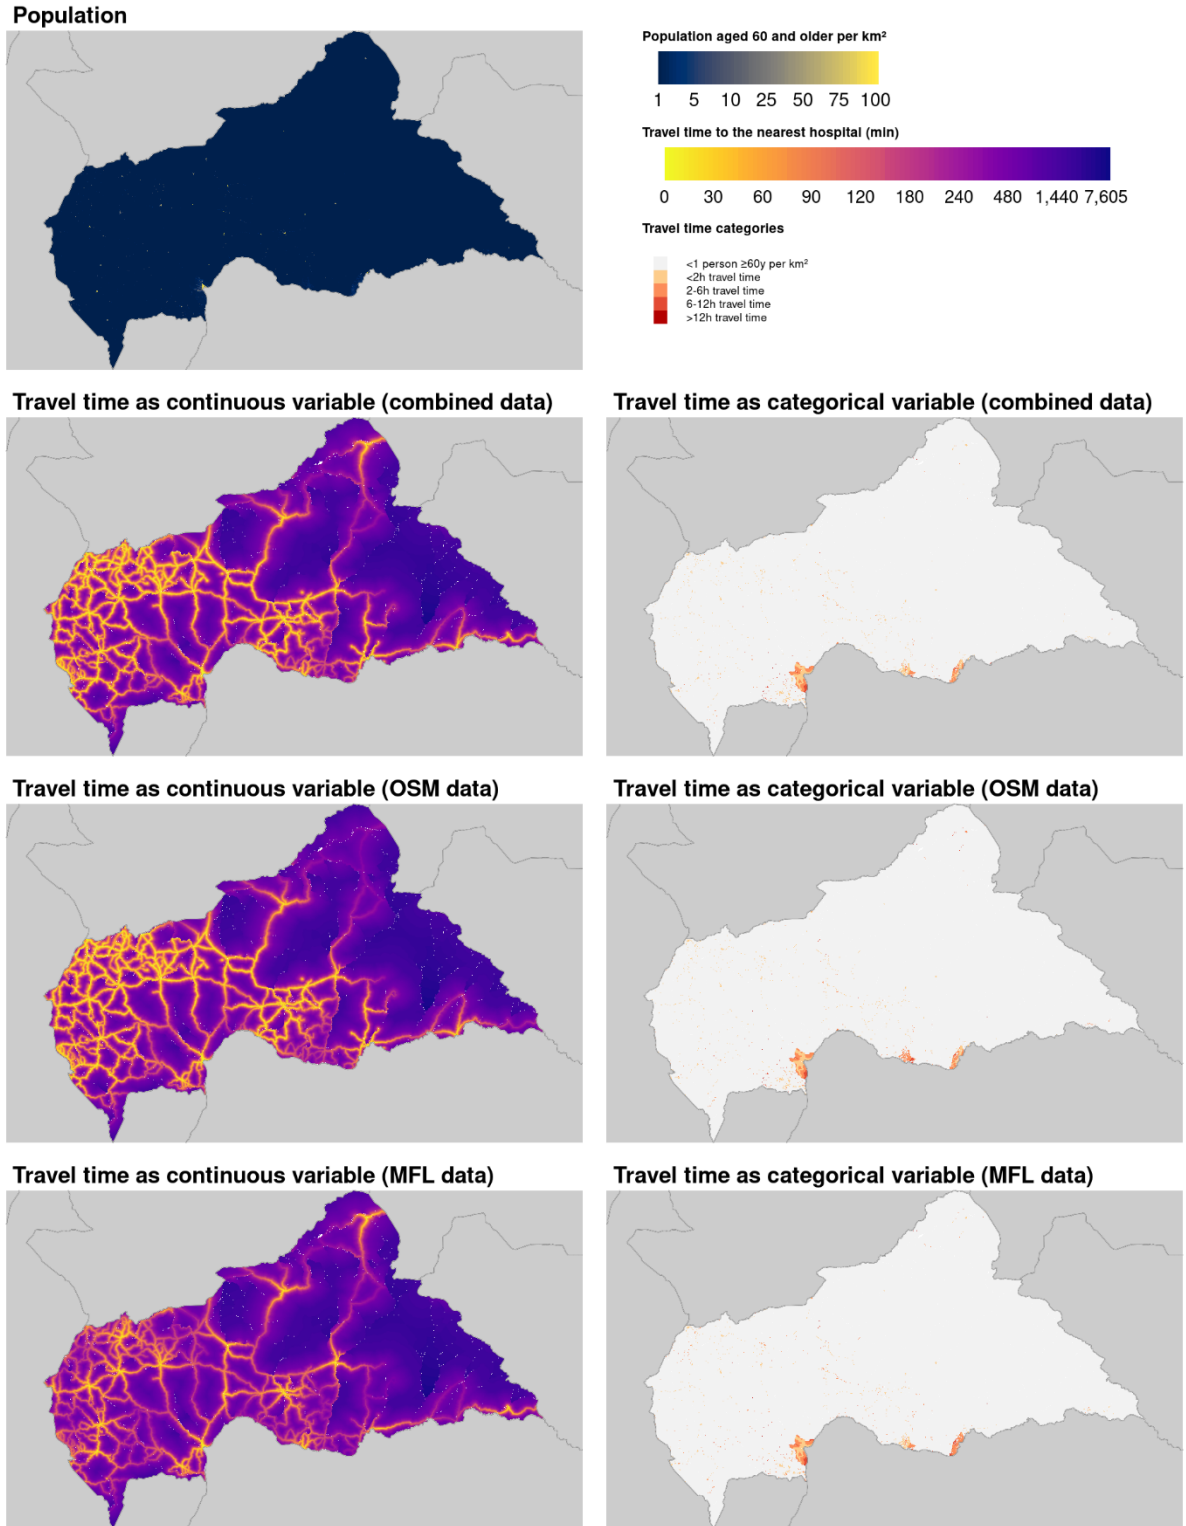

Figure S14. Chad map of travel time to the nearest hospital for adults aged  $\geq 60$  years

Population

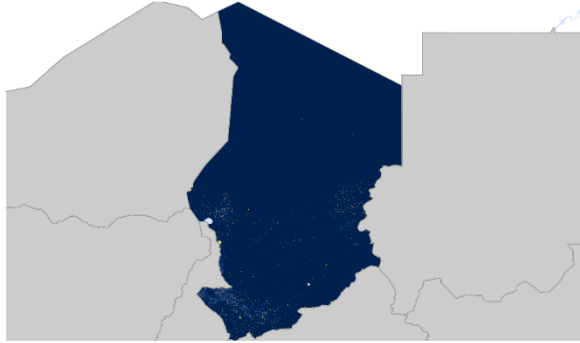

Population aged 60 and older per km<sup>2</sup>

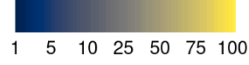

Travel time to the nearest hospital (min)

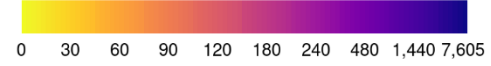

Travel time categories

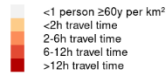

Travel time as continuous variable (combined data)

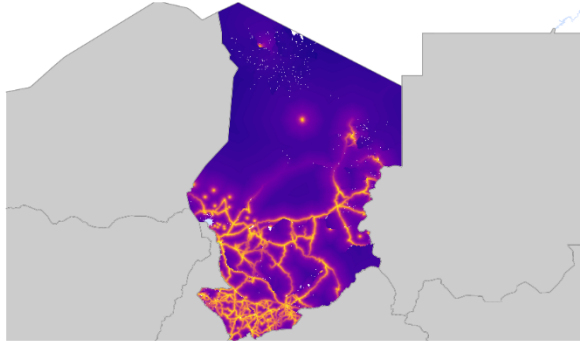

Travel time as categorical variable (combined data)

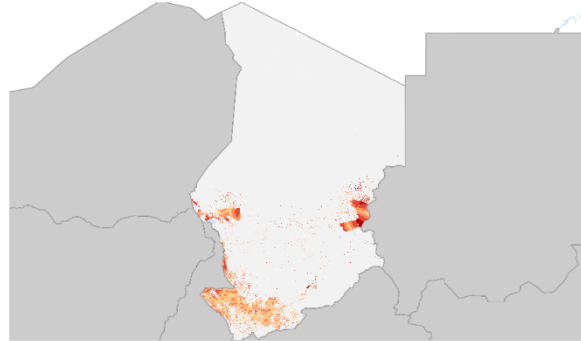

Travel time as continuous variable (OSM data)

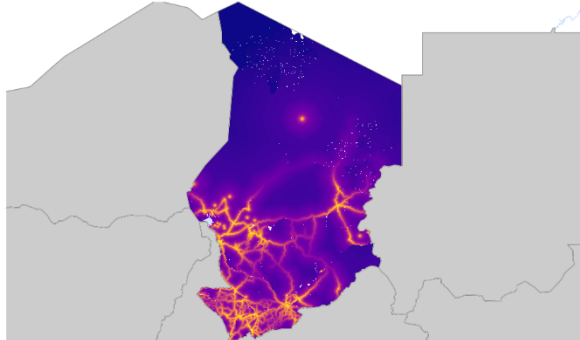

Travel time as categorical variable (OSM data)

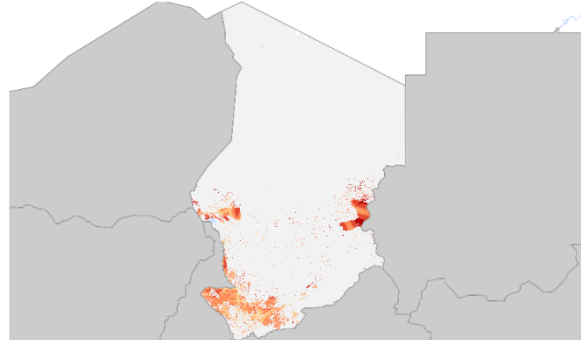

Travel time as continuous variable (MFL data)

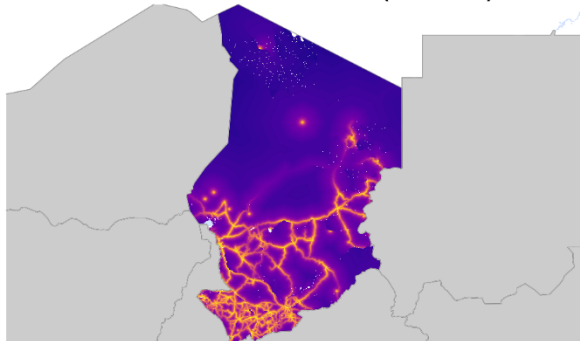

Travel time as categorical variable (MFL data)

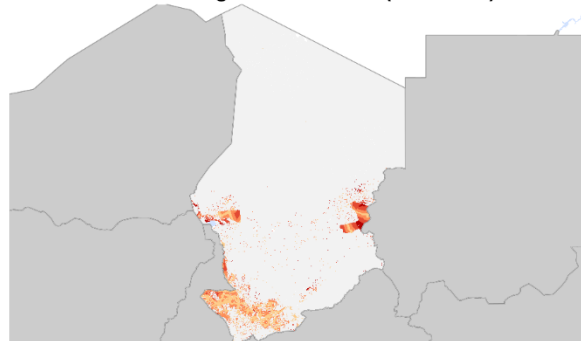

**Figure S15. Djibouti map of travel time to the nearest hospital for adults aged  $\geq 60$  years**

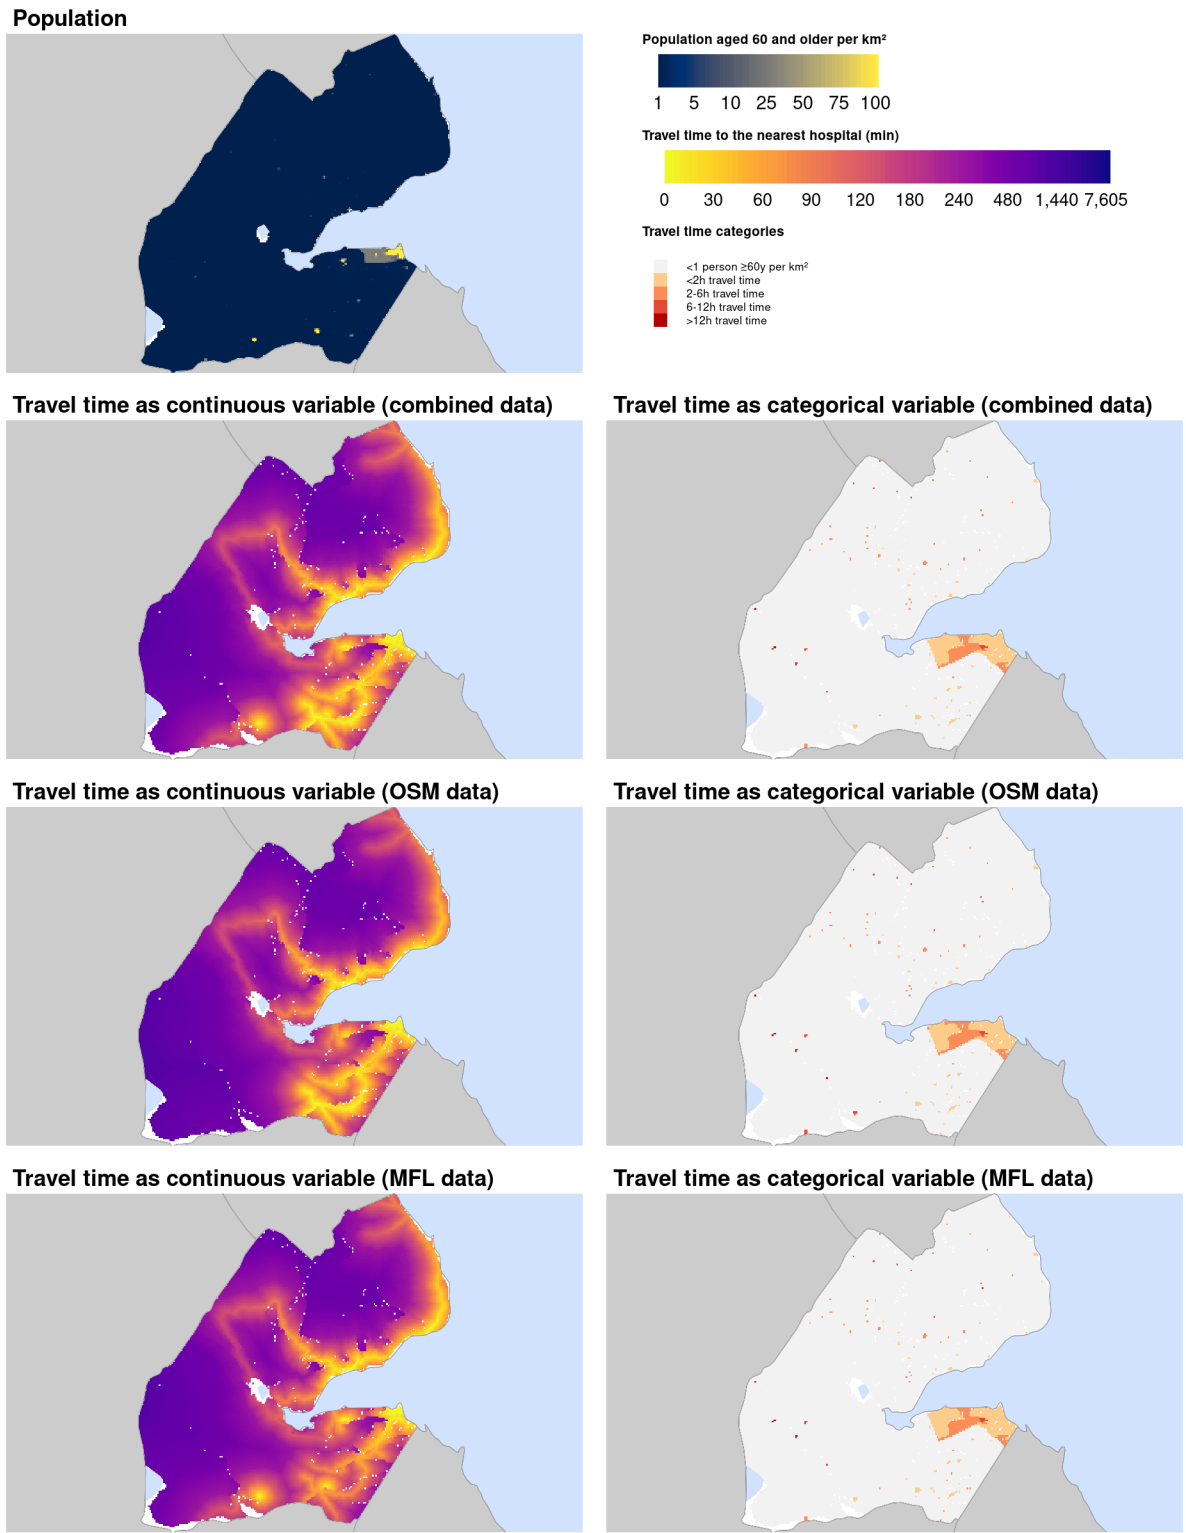



**Figure S16. DRC map of travel time to the nearest hospital for adults aged  $\geq 60$  years**

**Population**

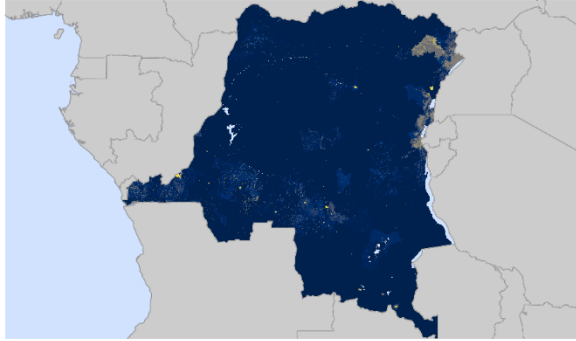

Population aged 60 and older per km<sup>2</sup>

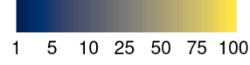

Travel time to the nearest hospital (min)

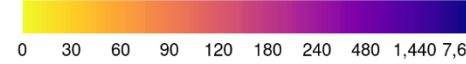

Travel time categories

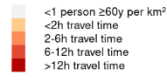

**Travel time as continuous variable (combined data)**

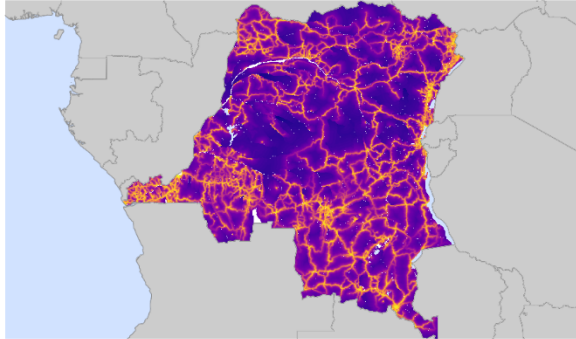

**Travel time as categorical variable (combined data)**

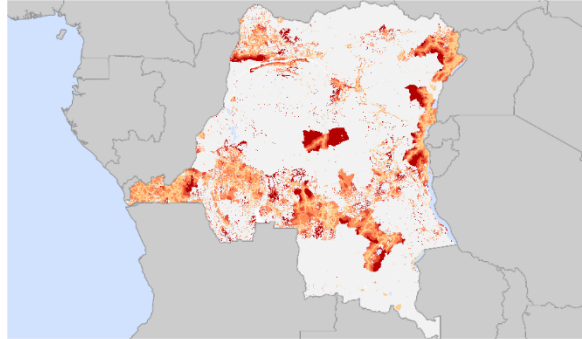

**Travel time as continuous variable (OSM data)**

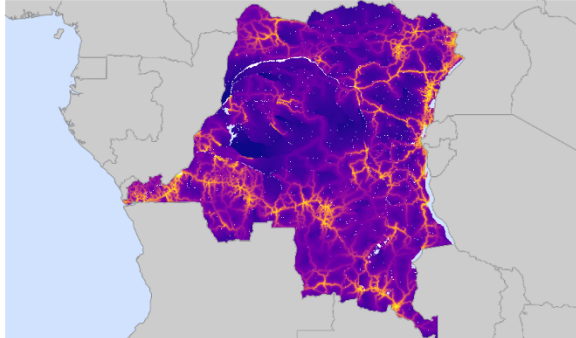

**Travel time as categorical variable (OSM data)**

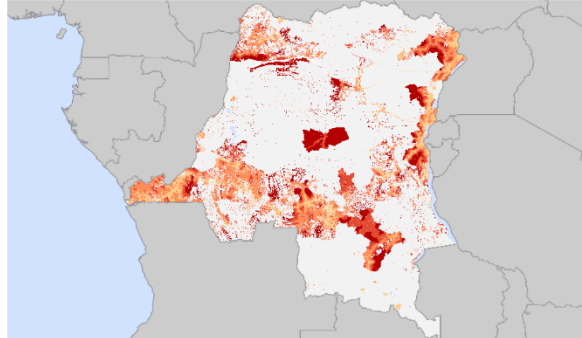

**Travel time as continuous variable (MFL data)**

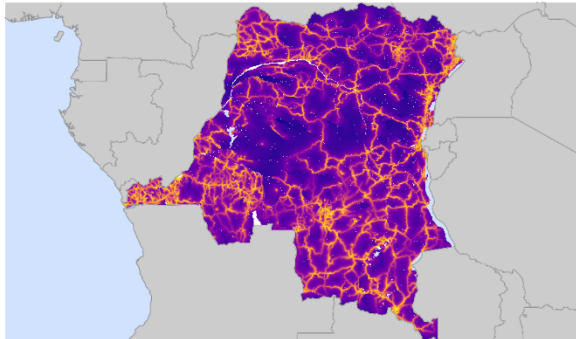

**Travel time as categorical variable (MFL data)**

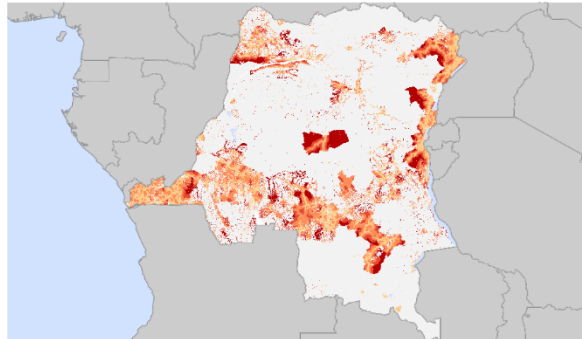

**Figure S17. Equatorial Guinea map of travel time to the nearest hospital for adults aged  $\geq 60$  years**

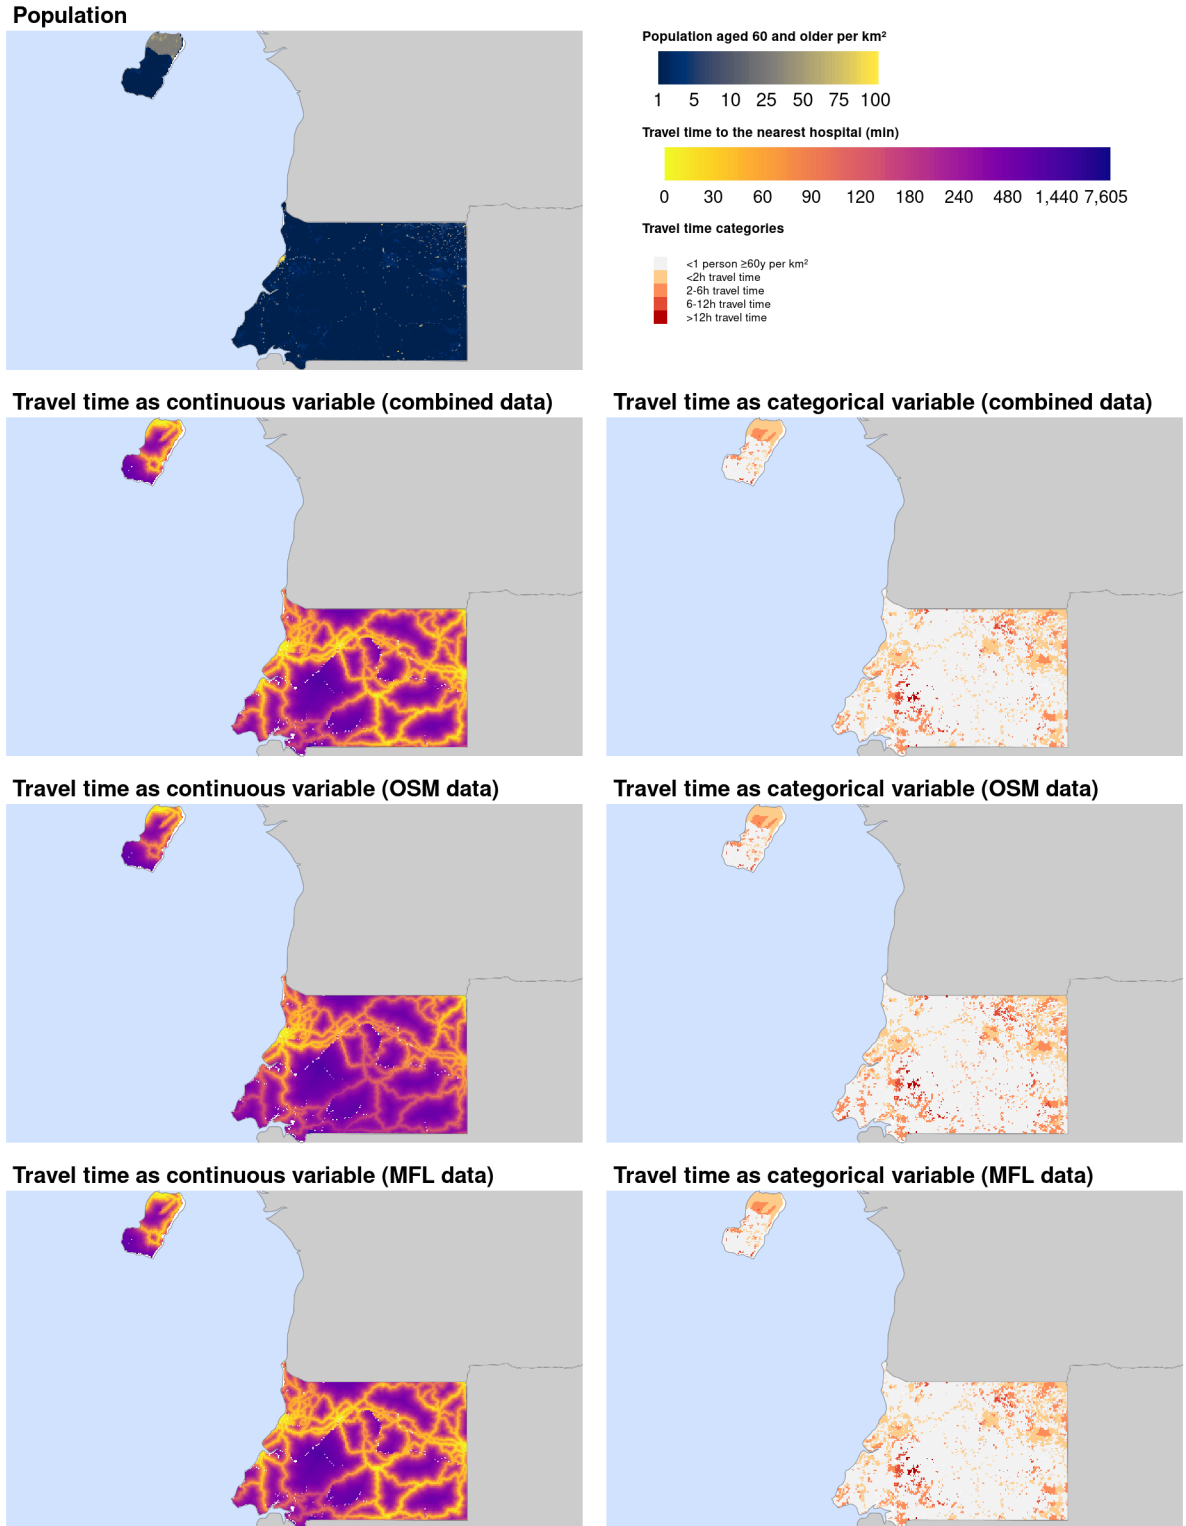

**Figure S18. Eritrea map of travel time to the nearest hospital for adults aged  $\geq 60$  years**

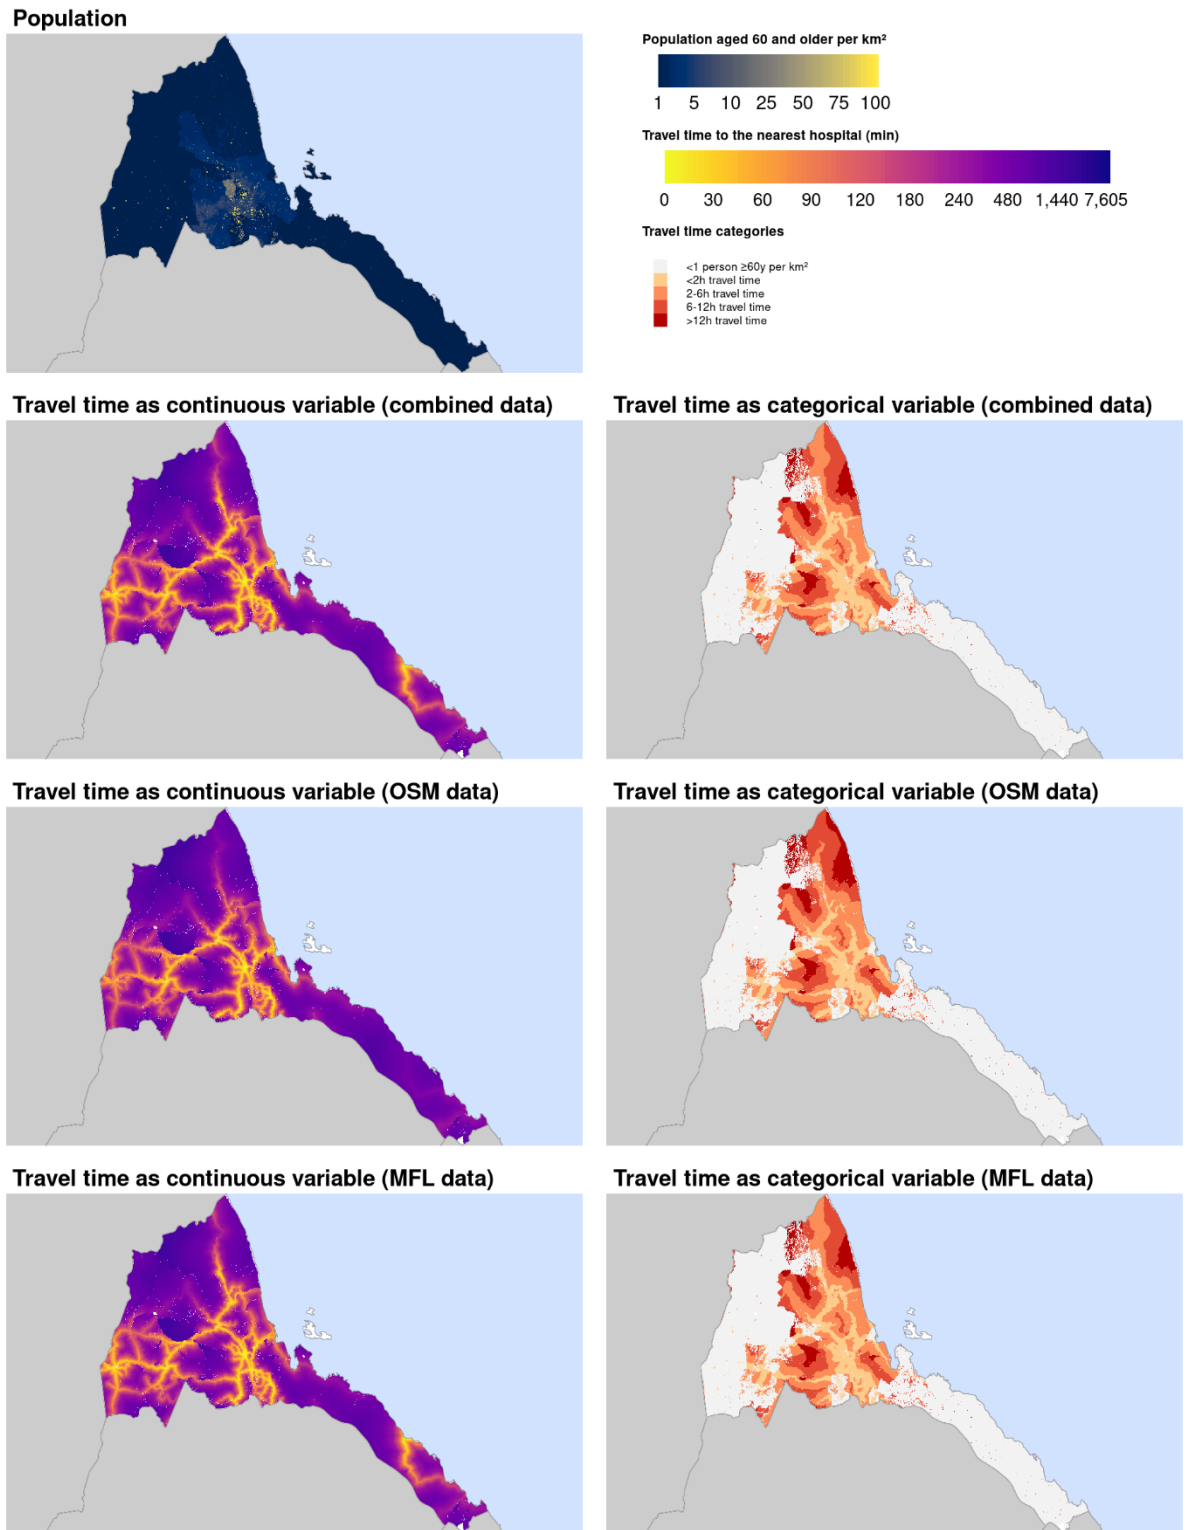

**Figure S19. eSwatini map of travel time to the nearest hospital for adults aged  $\geq 60$  years**

**Population**

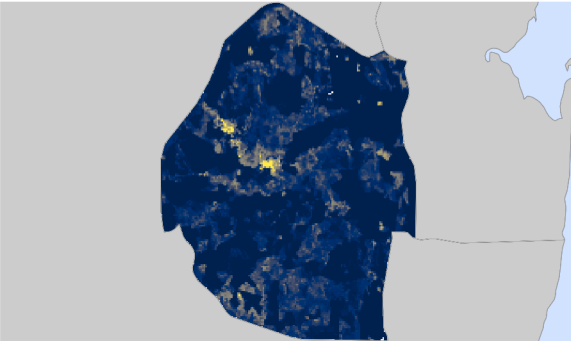

Population aged 60 and older per km<sup>2</sup>

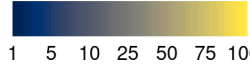

Travel time to the nearest hospital (min)

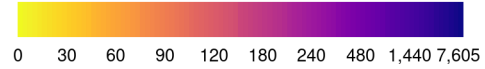

Travel time categories

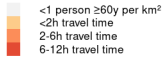

**Travel time as continuous variable (combined data)**

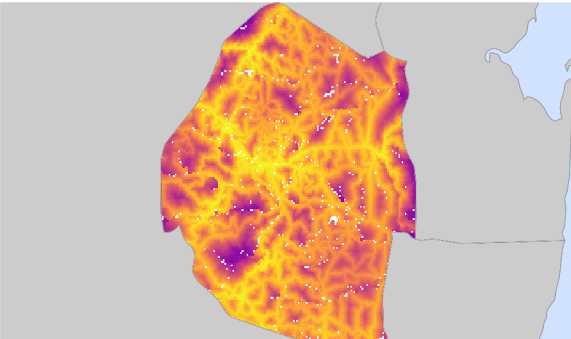

**Travel time as categorical variable (combined data)**

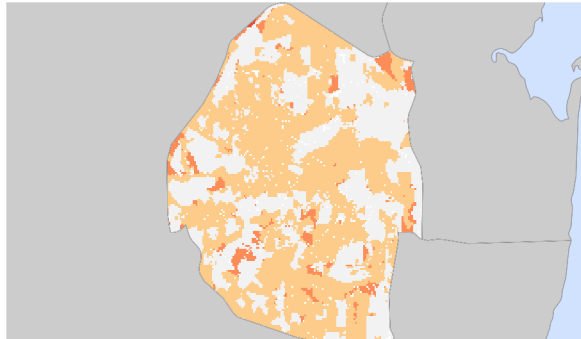

**Travel time as continuous variable (OSM data)**

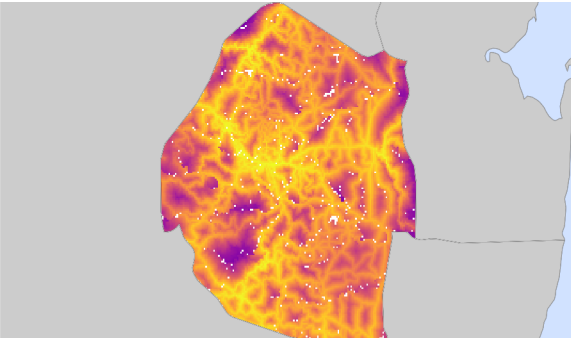

**Travel time as categorical variable (OSM data)**

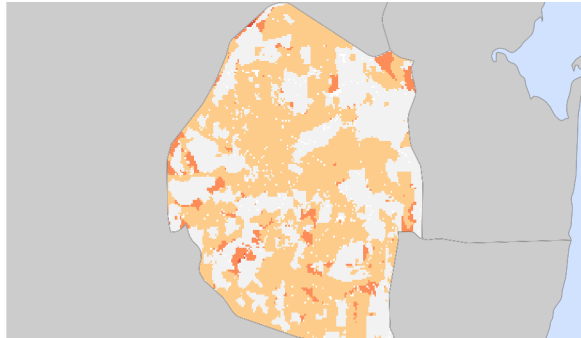

**Travel time as continuous variable (MFL data)**

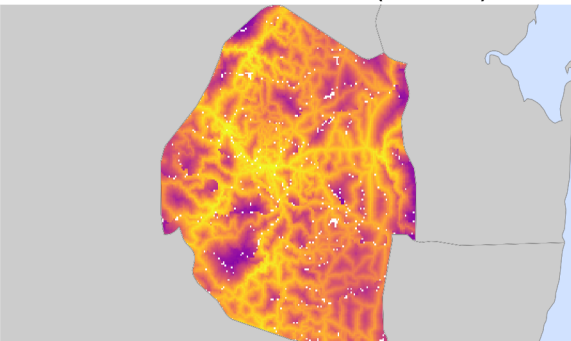

**Travel time as categorical variable (MFL data)**

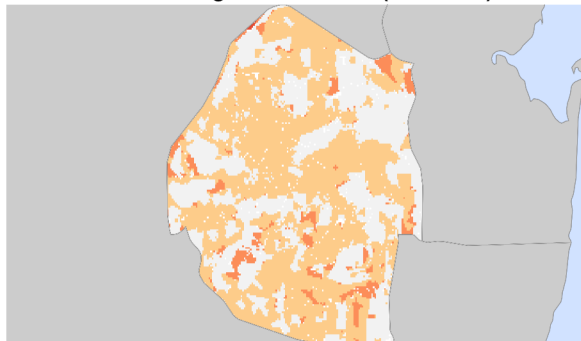

**Figure S20. Ethiopia map of travel time to the nearest hospital for adults aged  $\geq 60$  years**

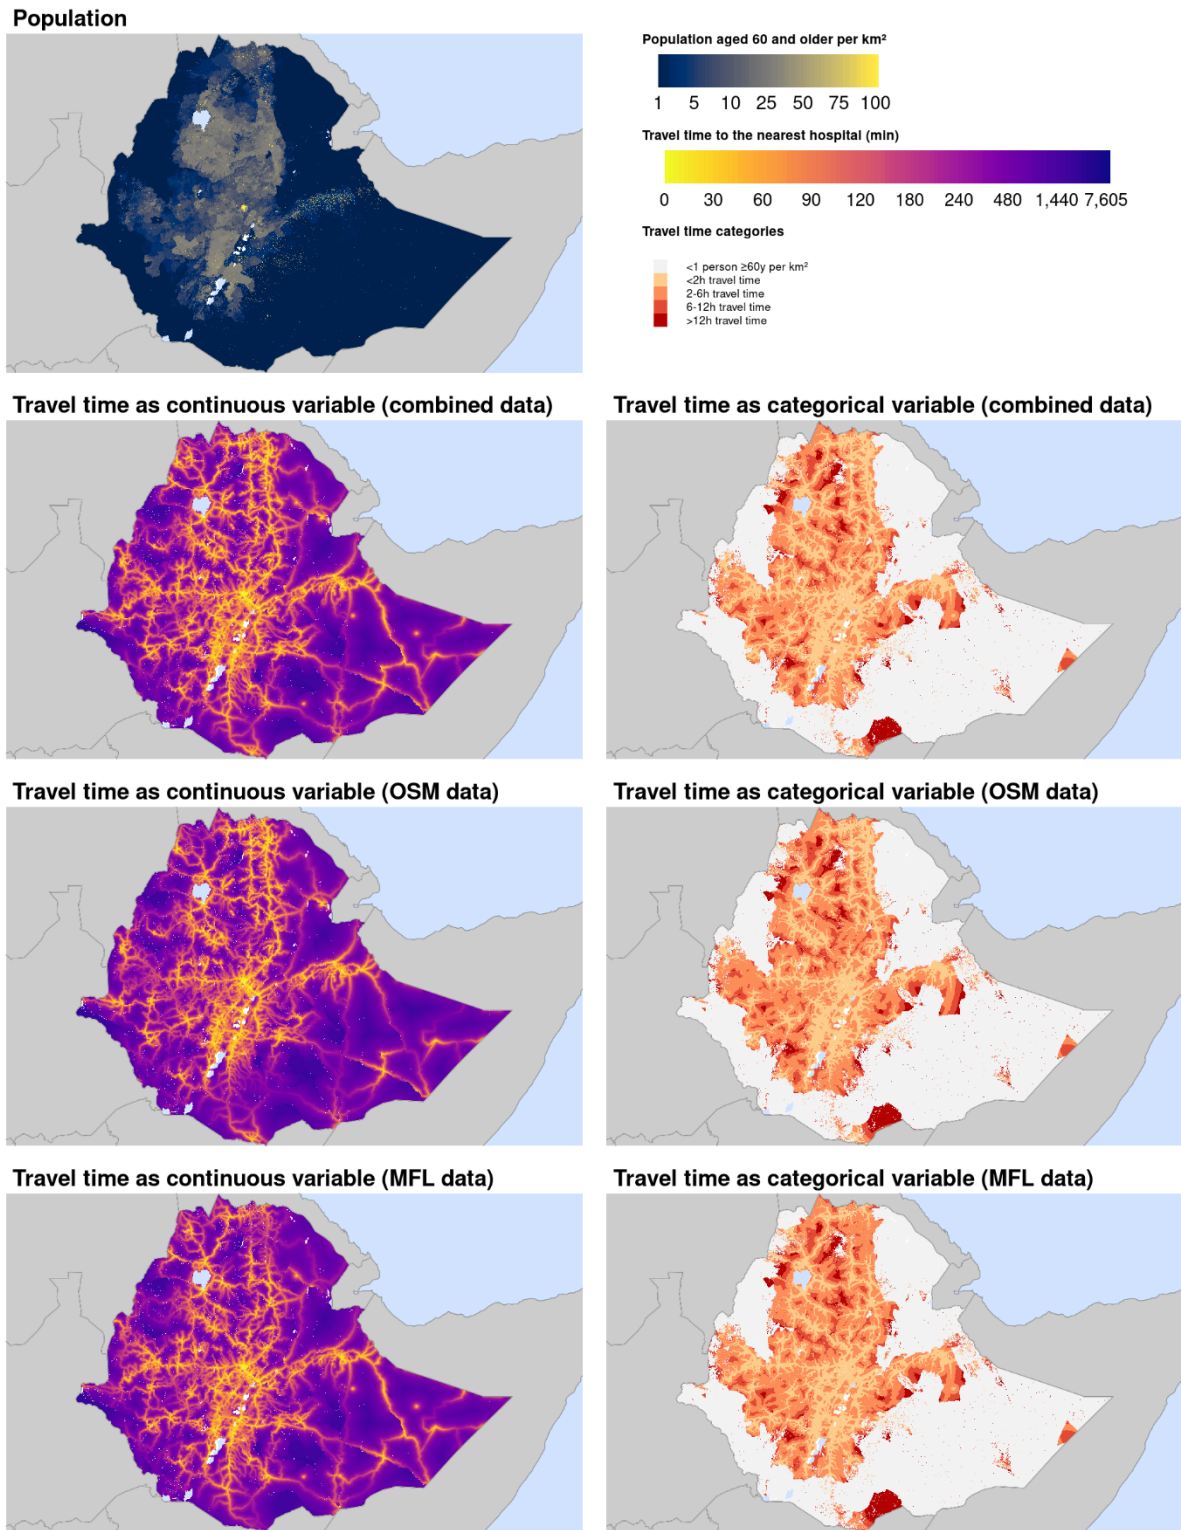

**Figure S21. Gabon map of travel time to the nearest hospital for adults aged  $\geq 60$  years**

**Population**

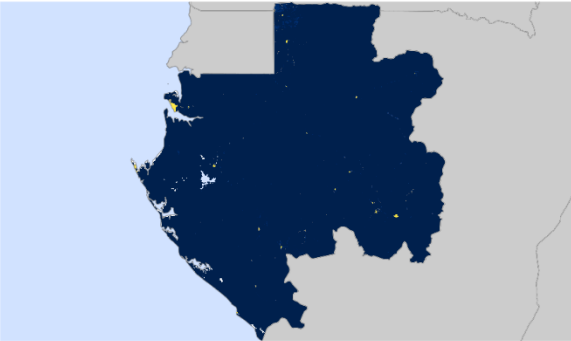

Population aged 60 and older per km<sup>2</sup>



Travel time to the nearest hospital (min)

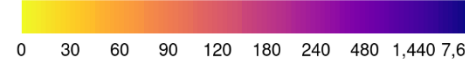

Travel time categories

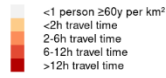

**Travel time as continuous variable (combined data)**

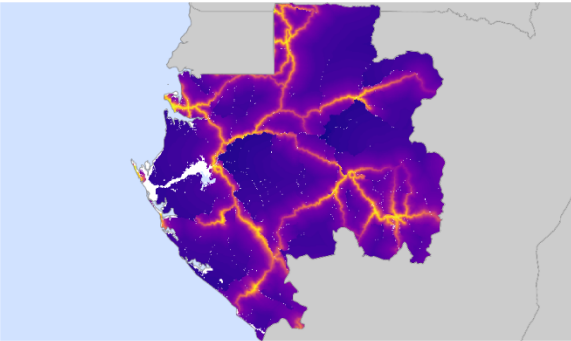

**Travel time as categorical variable (combined data)**

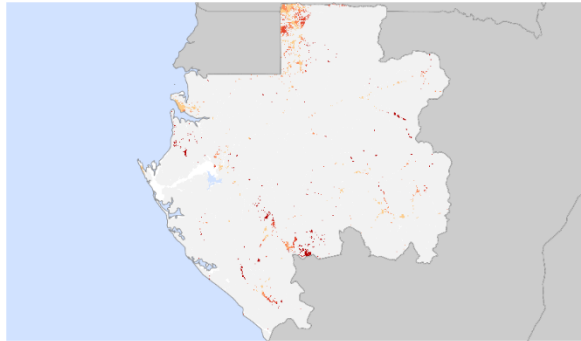

**Travel time as continuous variable (OSM data)**

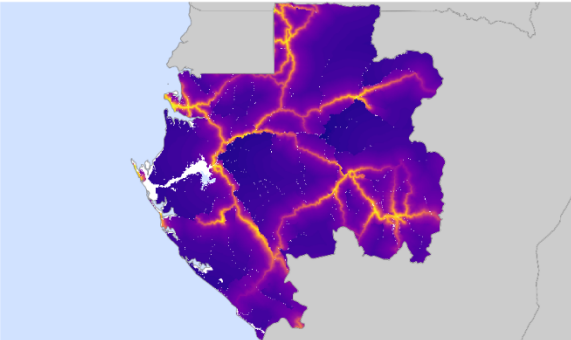

**Travel time as categorical variable (OSM data)**

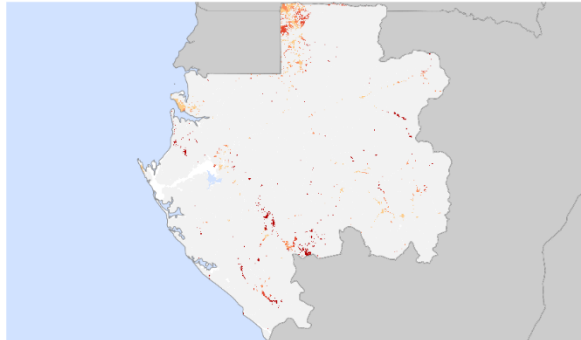

**Travel time as continuous variable (MFL data)**

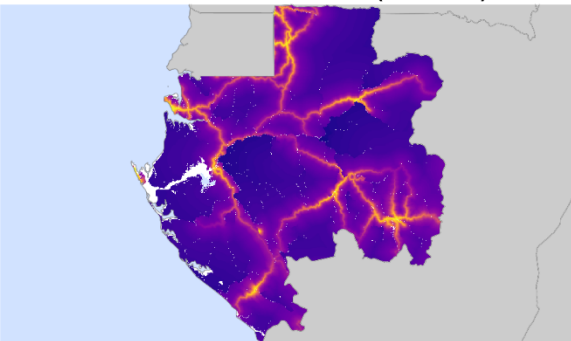

**Travel time as categorical variable (MFL data)**

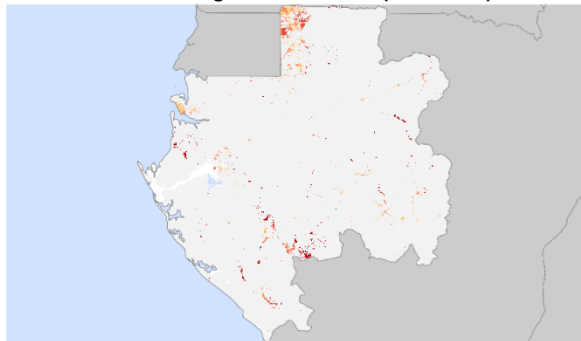

**Figure S22. Ghana map of travel time to the nearest hospital for adults aged  $\geq 60$  years**

**Population**

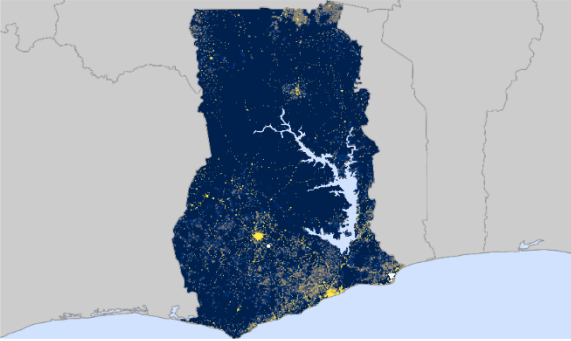

Population aged 60 and older per km<sup>2</sup>



Travel time to the nearest hospital (min)



Travel time categories

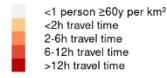

**Travel time as continuous variable (combined data)**

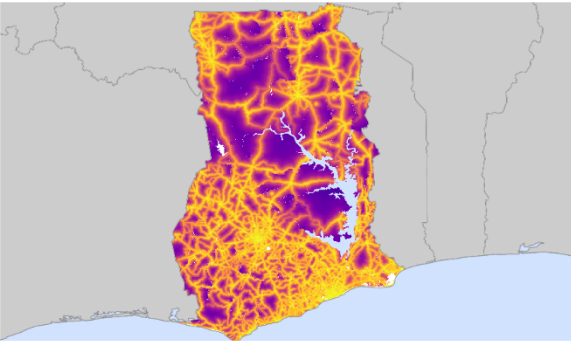

**Travel time as categorical variable (combined data)**

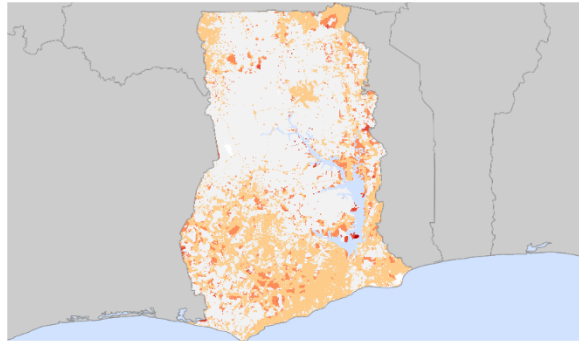

**Travel time as continuous variable (OSM data)**

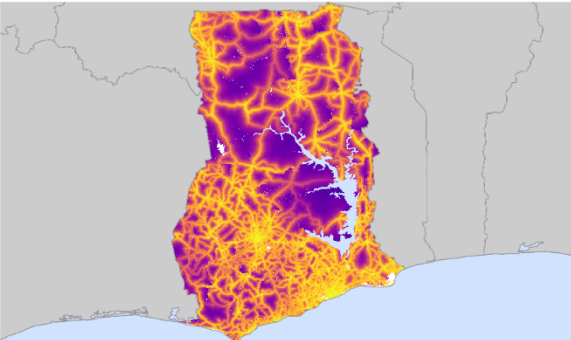

**Travel time as categorical variable (OSM data)**

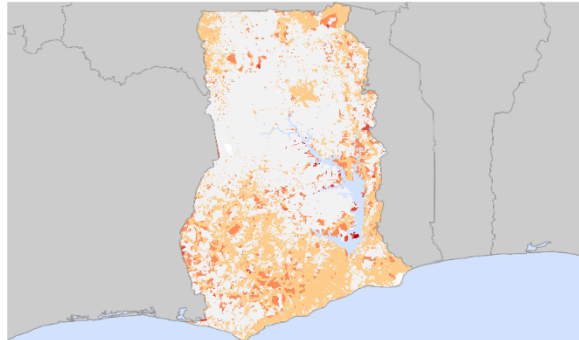

**Travel time as continuous variable (MFL data)**

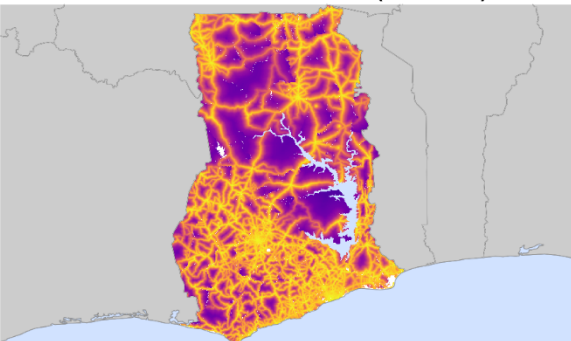

**Travel time as categorical variable (MFL data)**

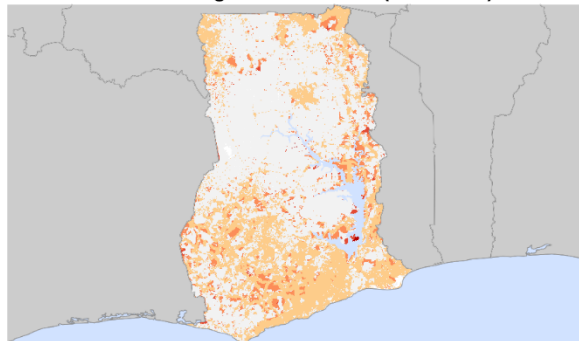

Figure S23. Guinea map of travel time to the nearest hospital for adults aged  $\geq 60$  years

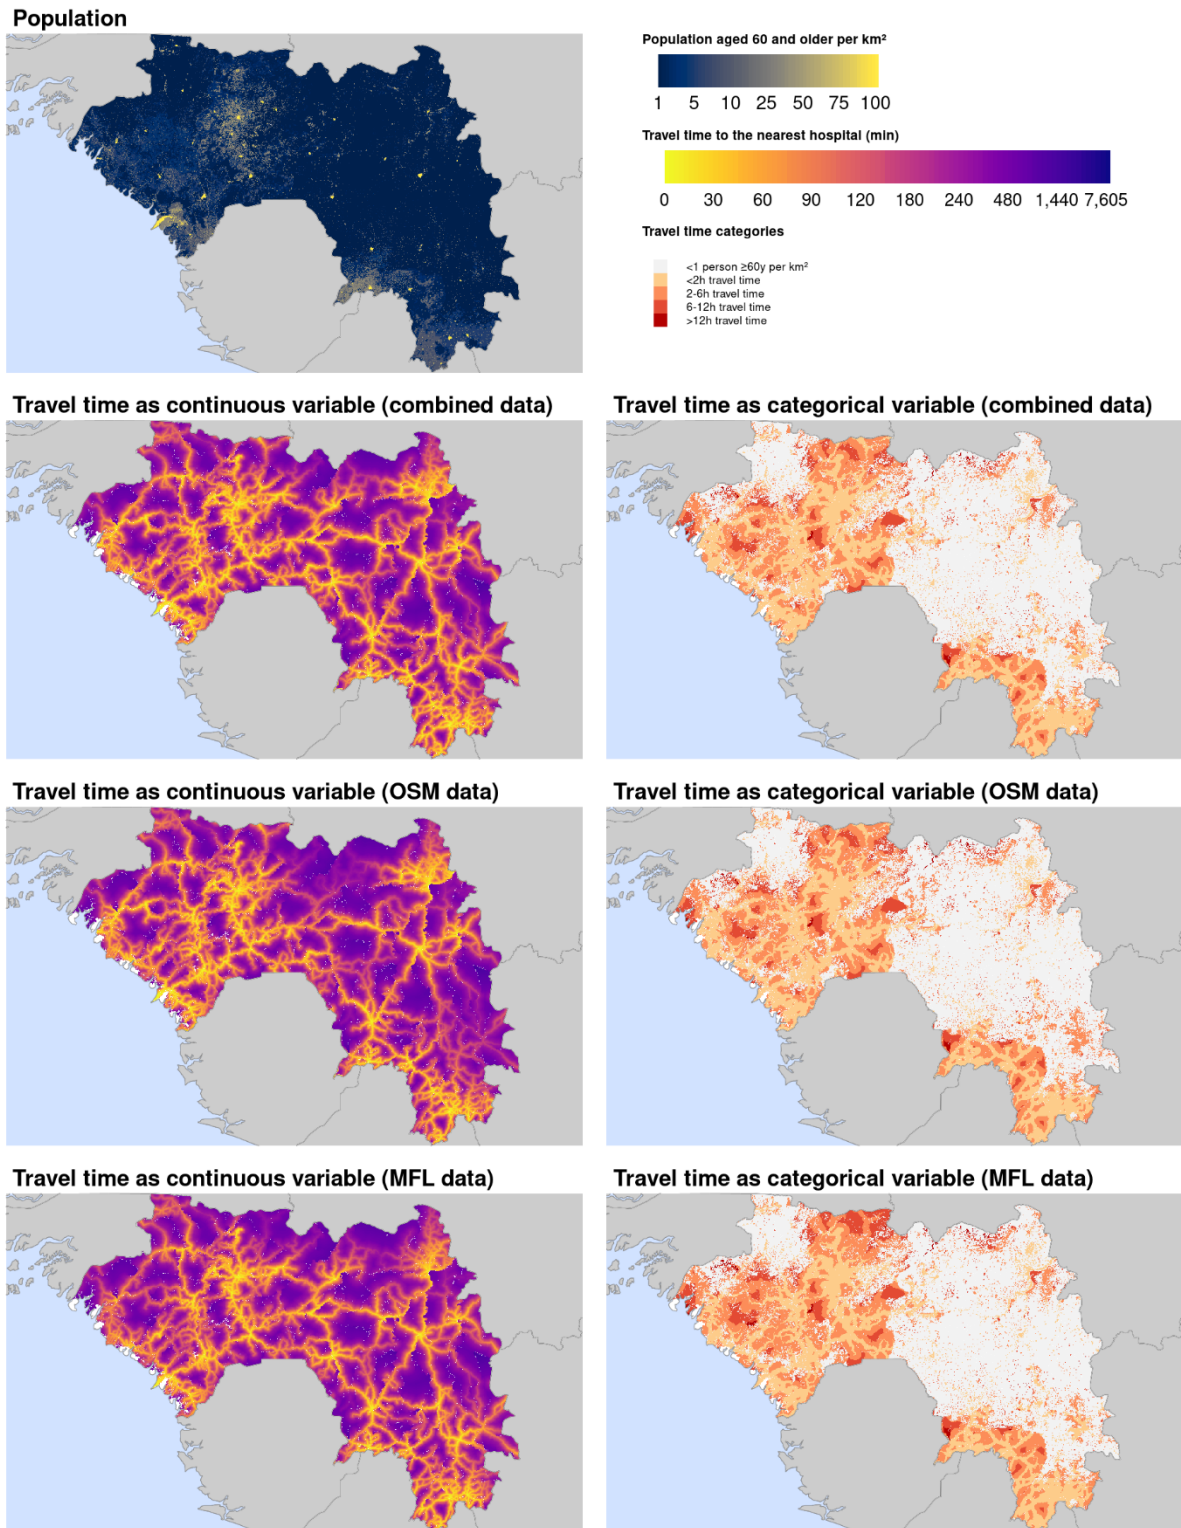



**Figure S24. Guinea-Bissau map of travel time to the nearest hospital for adults aged  $\geq 60$  years**

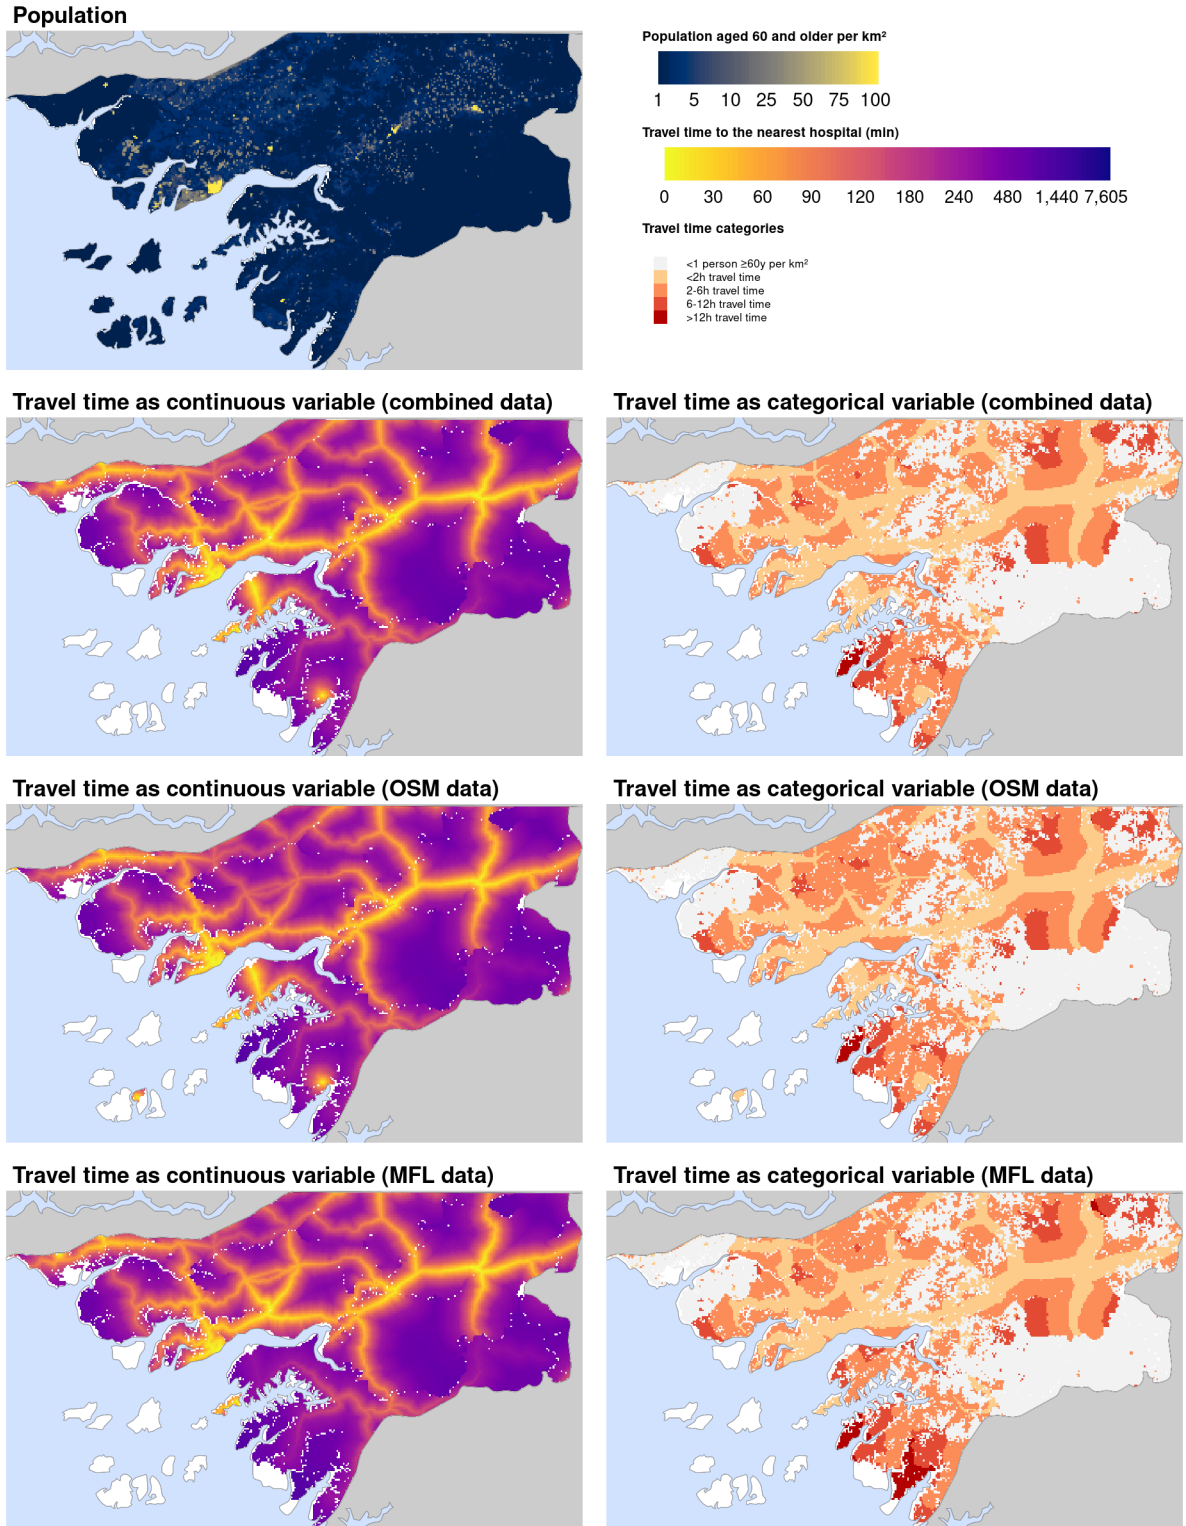

**Figure S25. Ivory Coast map of travel time to the nearest hospital for adults aged  $\geq 60$  years**

**Population**

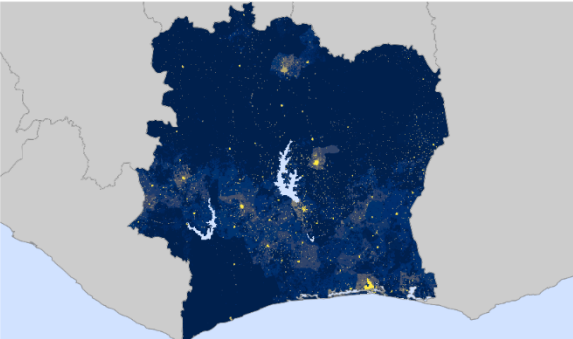

Population aged 60 and older per km<sup>2</sup>



Travel time to the nearest hospital (min)



Travel time categories

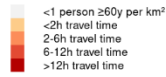

**Travel time as continuous variable (combined data)**

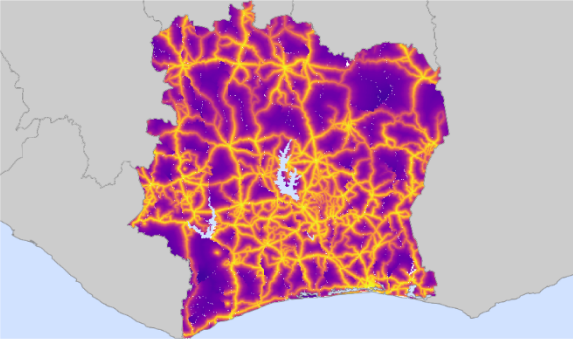

**Travel time as categorical variable (combined data)**

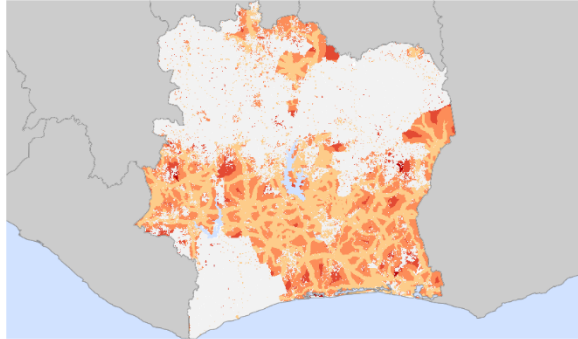

**Travel time as continuous variable (OSM data)**

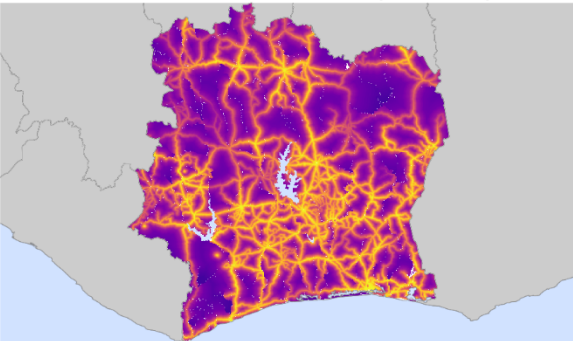

**Travel time as categorical variable (OSM data)**

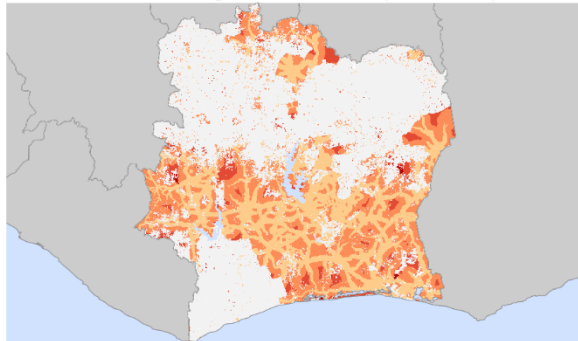

**Travel time as continuous variable (MFL data)**

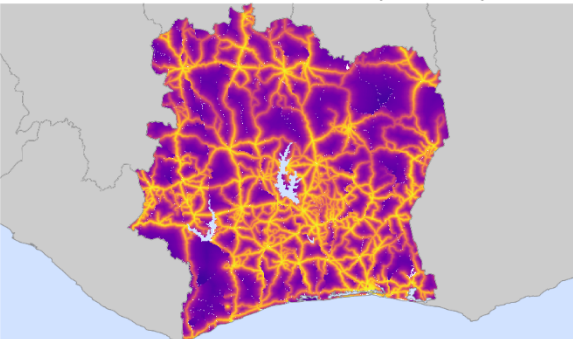

**Travel time as categorical variable (MFL data)**

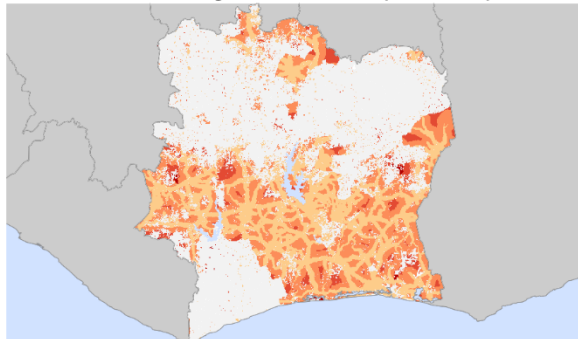

**Figure S26. Kenya map of travel time to the nearest hospital for adults aged  $\geq 60$  years**

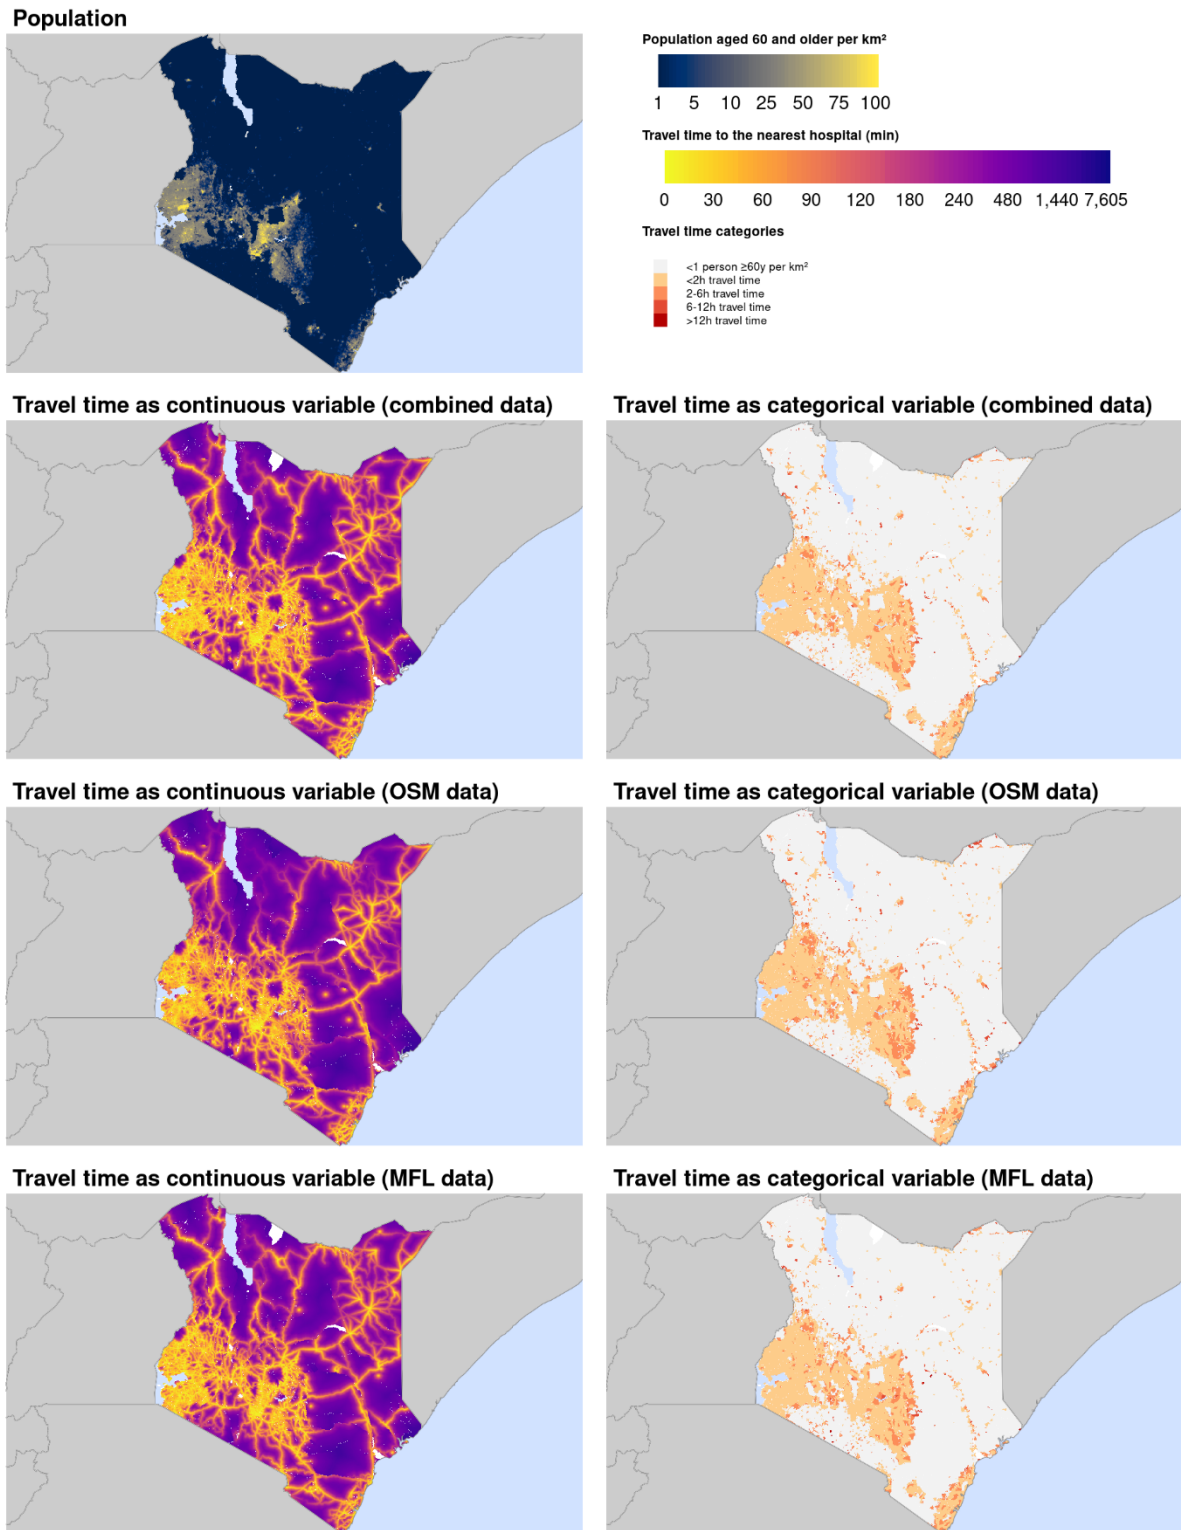

**Figure S27. Lesotho map of travel time to the nearest hospital for adults aged  $\geq 60$  years**

**Population**

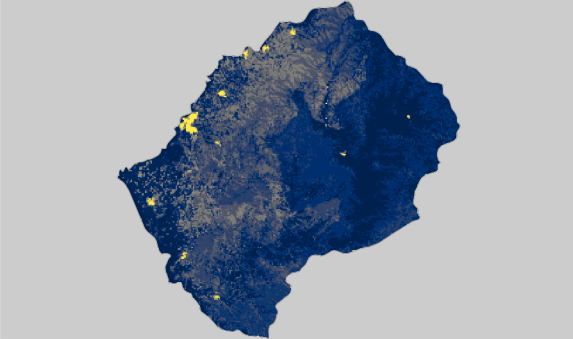

Population aged 60 and older per km<sup>2</sup>



Travel time to the nearest hospital (min)



Travel time categories



**Travel time as continuous variable (combined data)**

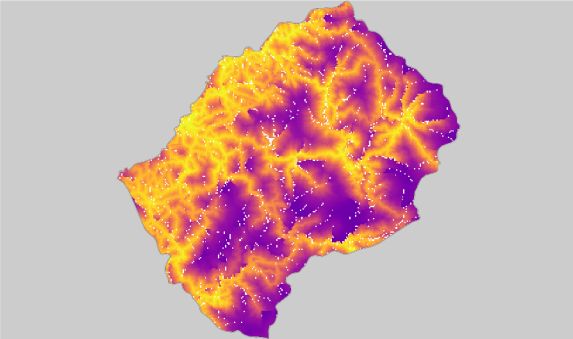

**Travel time as categorical variable (combined data)**

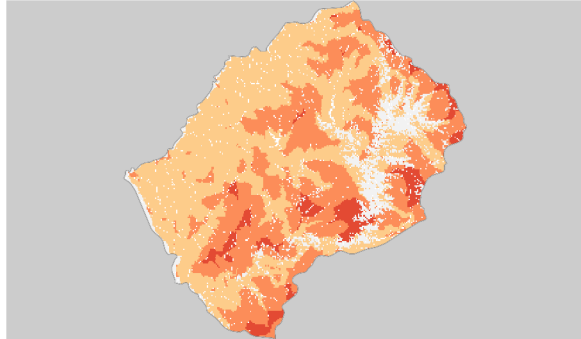

**Travel time as continuous variable (OSM data)**

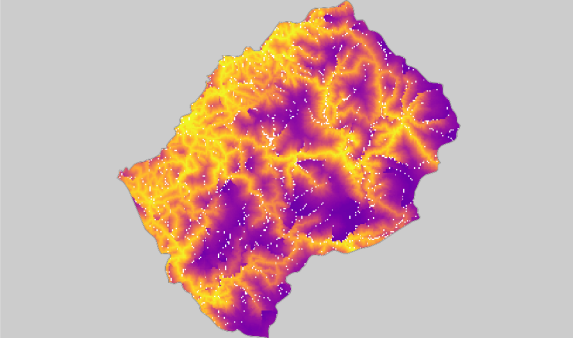

**Travel time as categorical variable (OSM data)**

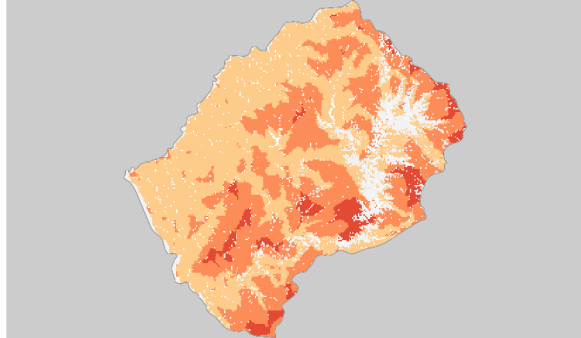

**Travel time as continuous variable (MFL data)**

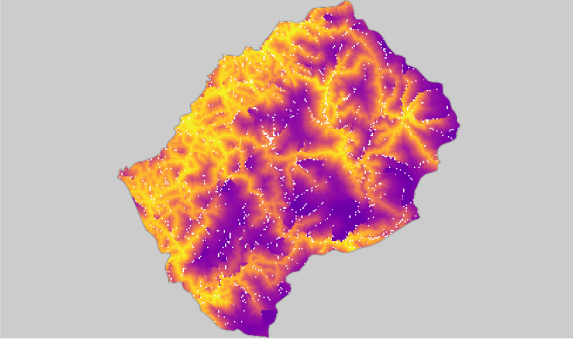

**Travel time as categorical variable (MFL data)**

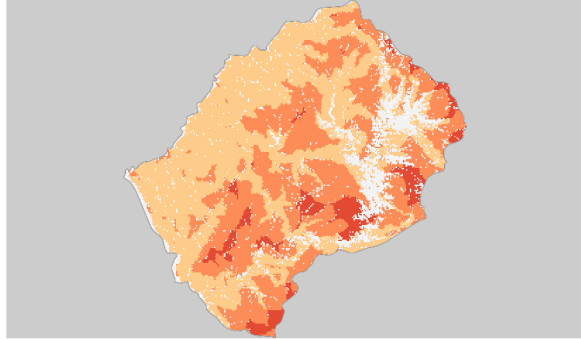

**Figure S28. Liberia map of travel time to the nearest hospital for adults aged  $\geq 60$  years**

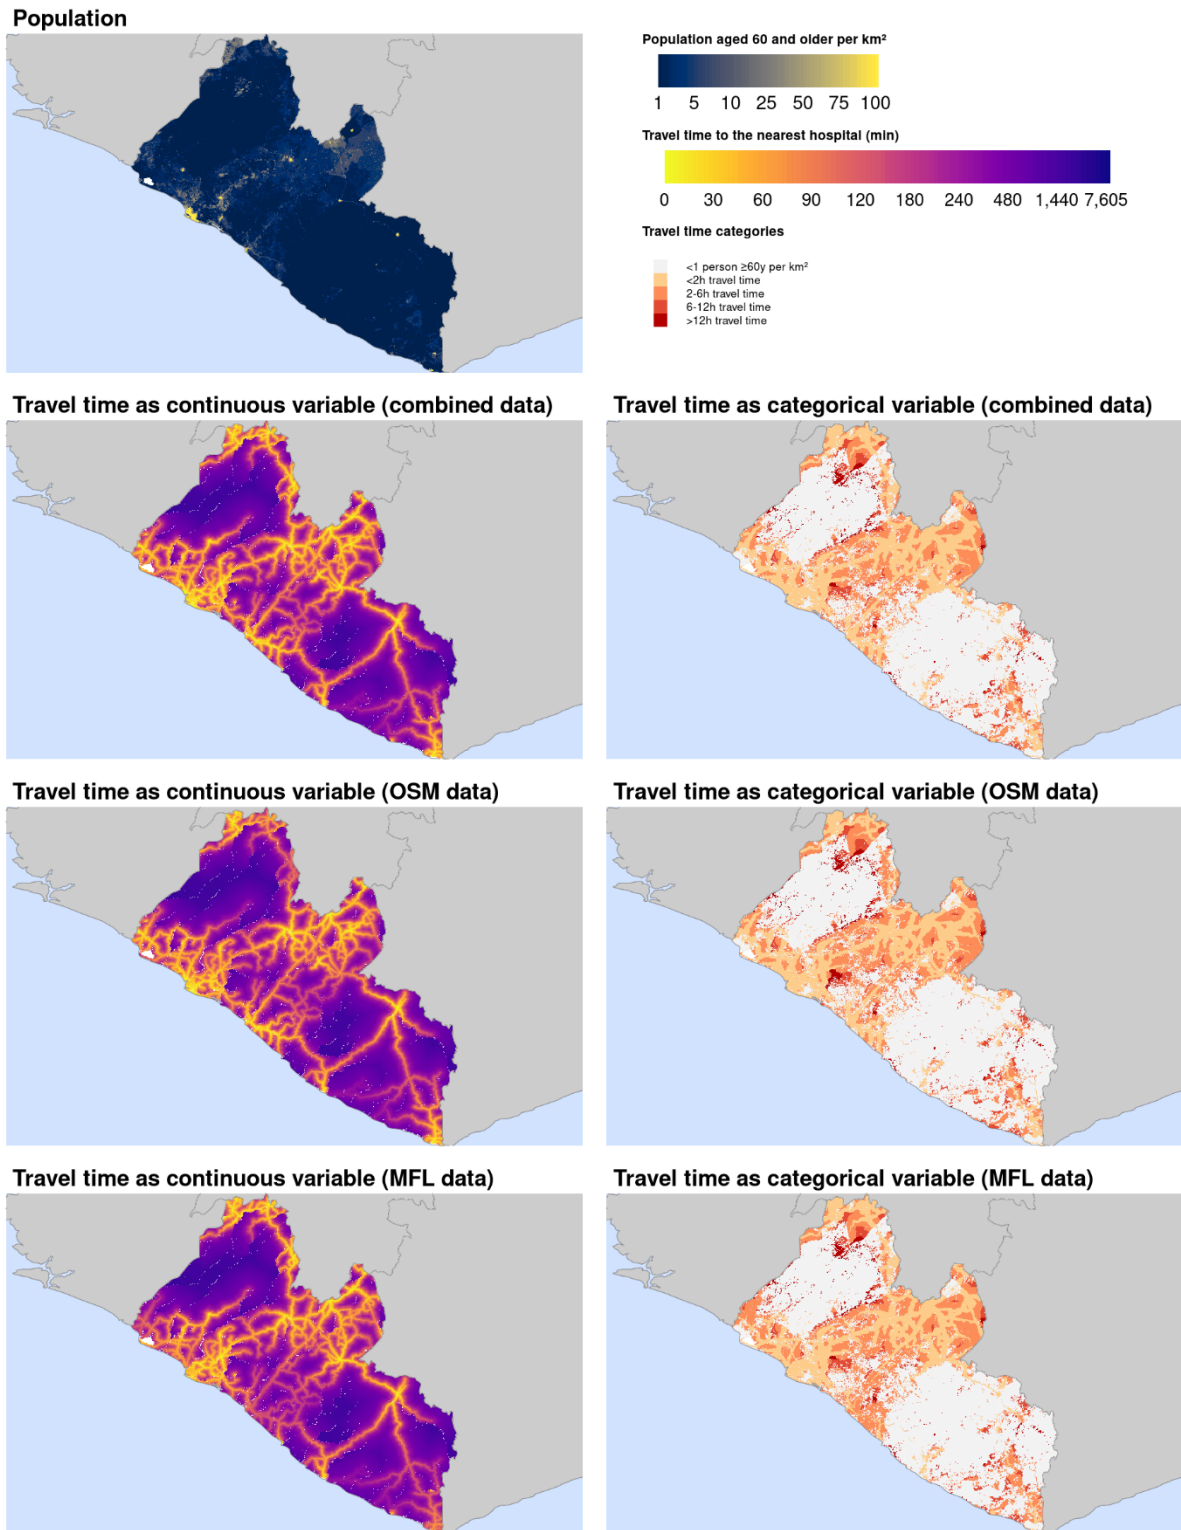

**Figure S29. Madagascar map of travel time to the nearest hospital for adults aged  $\geq 60$  years**

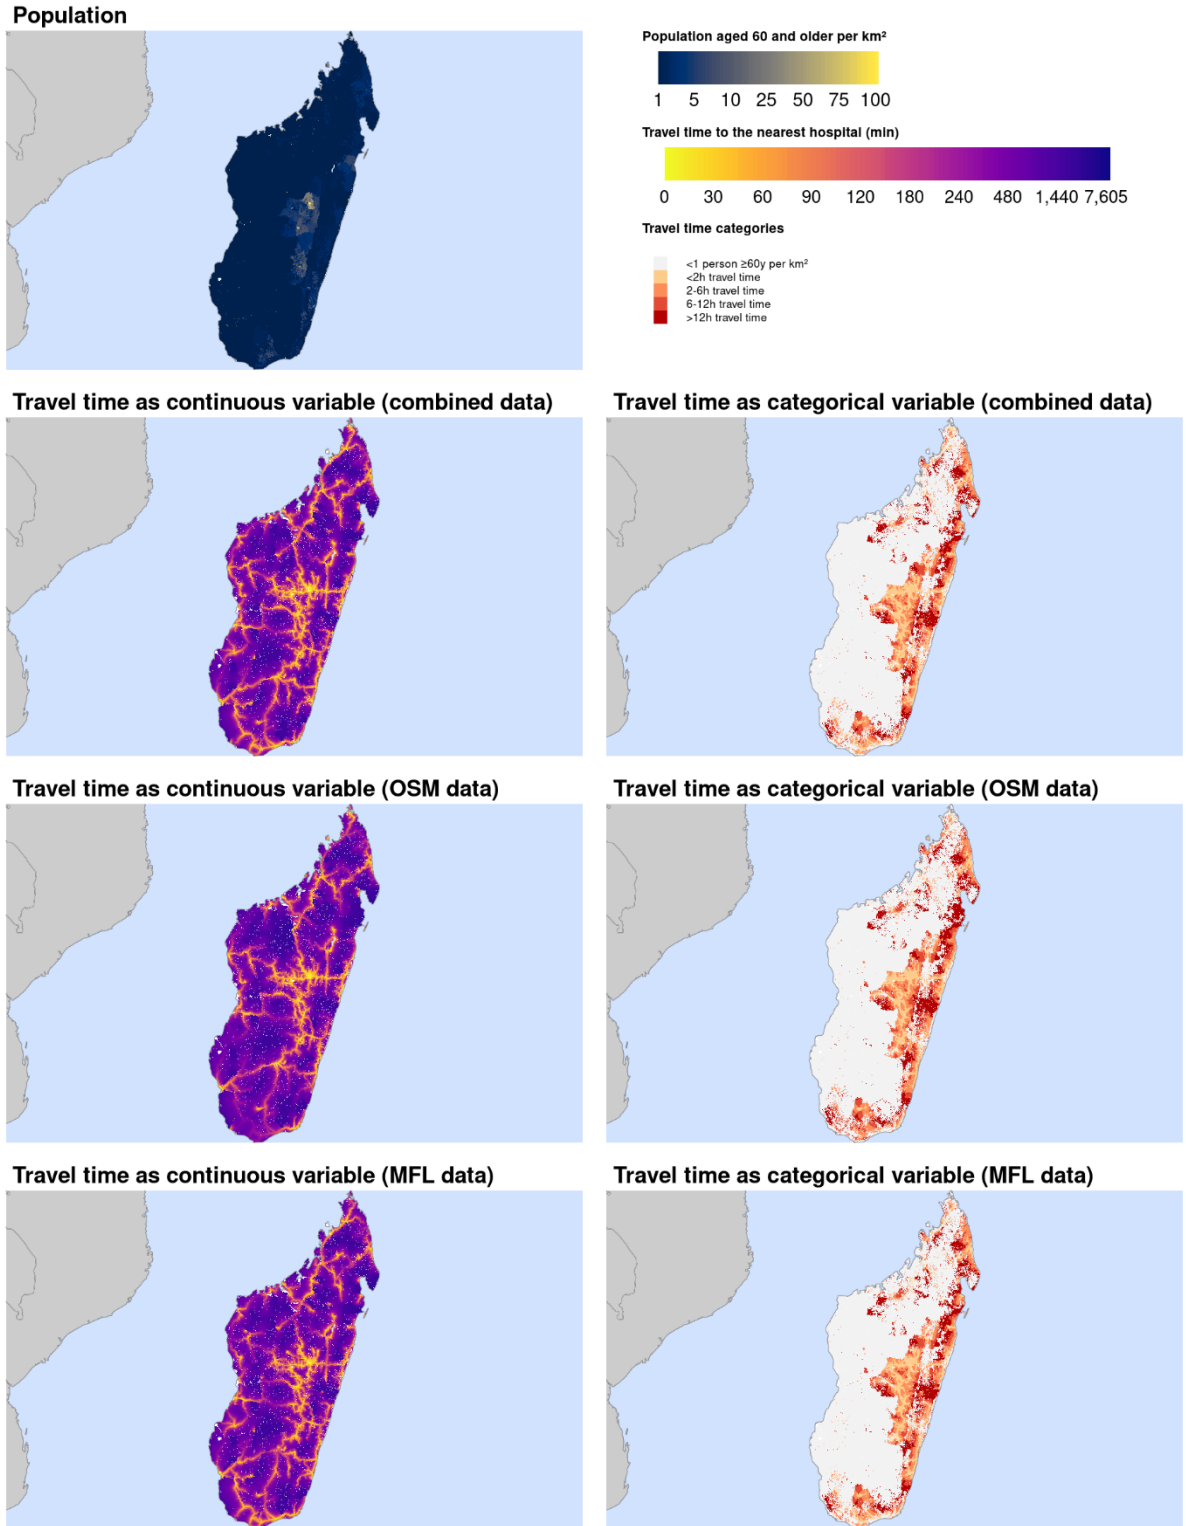

**Figure S30. Malawi map of travel time to the nearest hospital for adults aged  $\geq 60$  years**

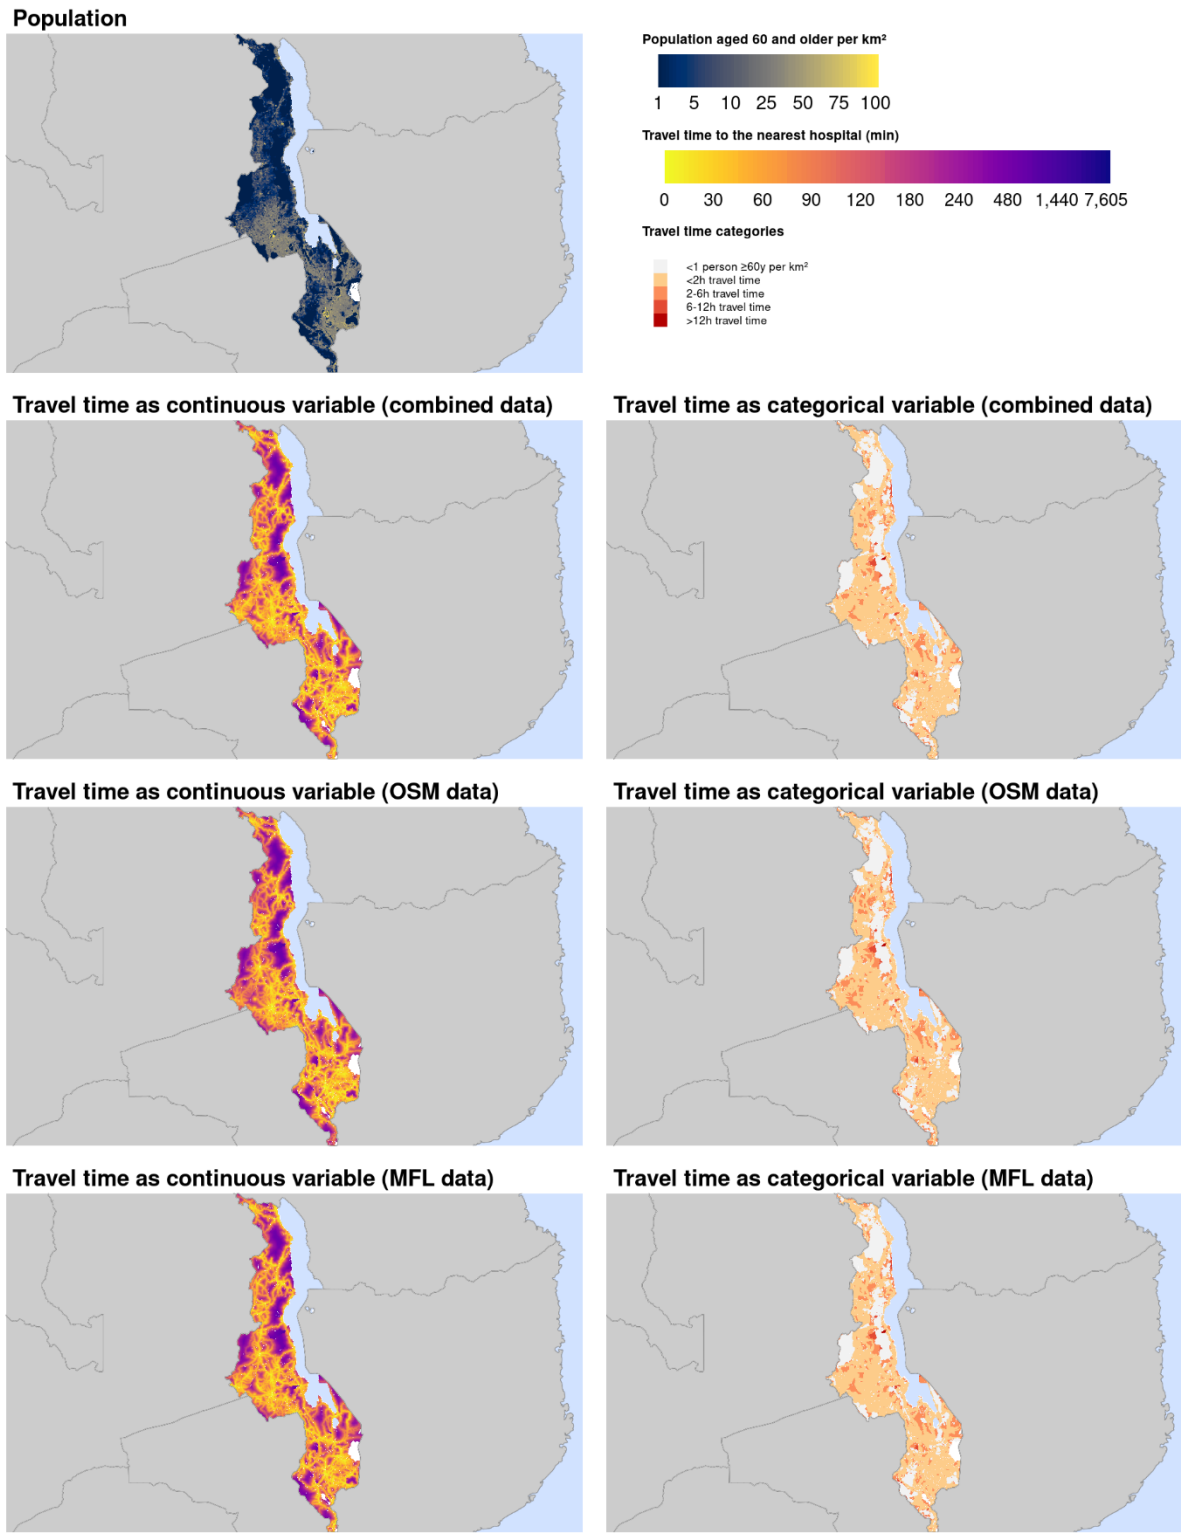

Figure S31. Mali map of travel time to the nearest hospital for adults aged  $\geq 60$  years

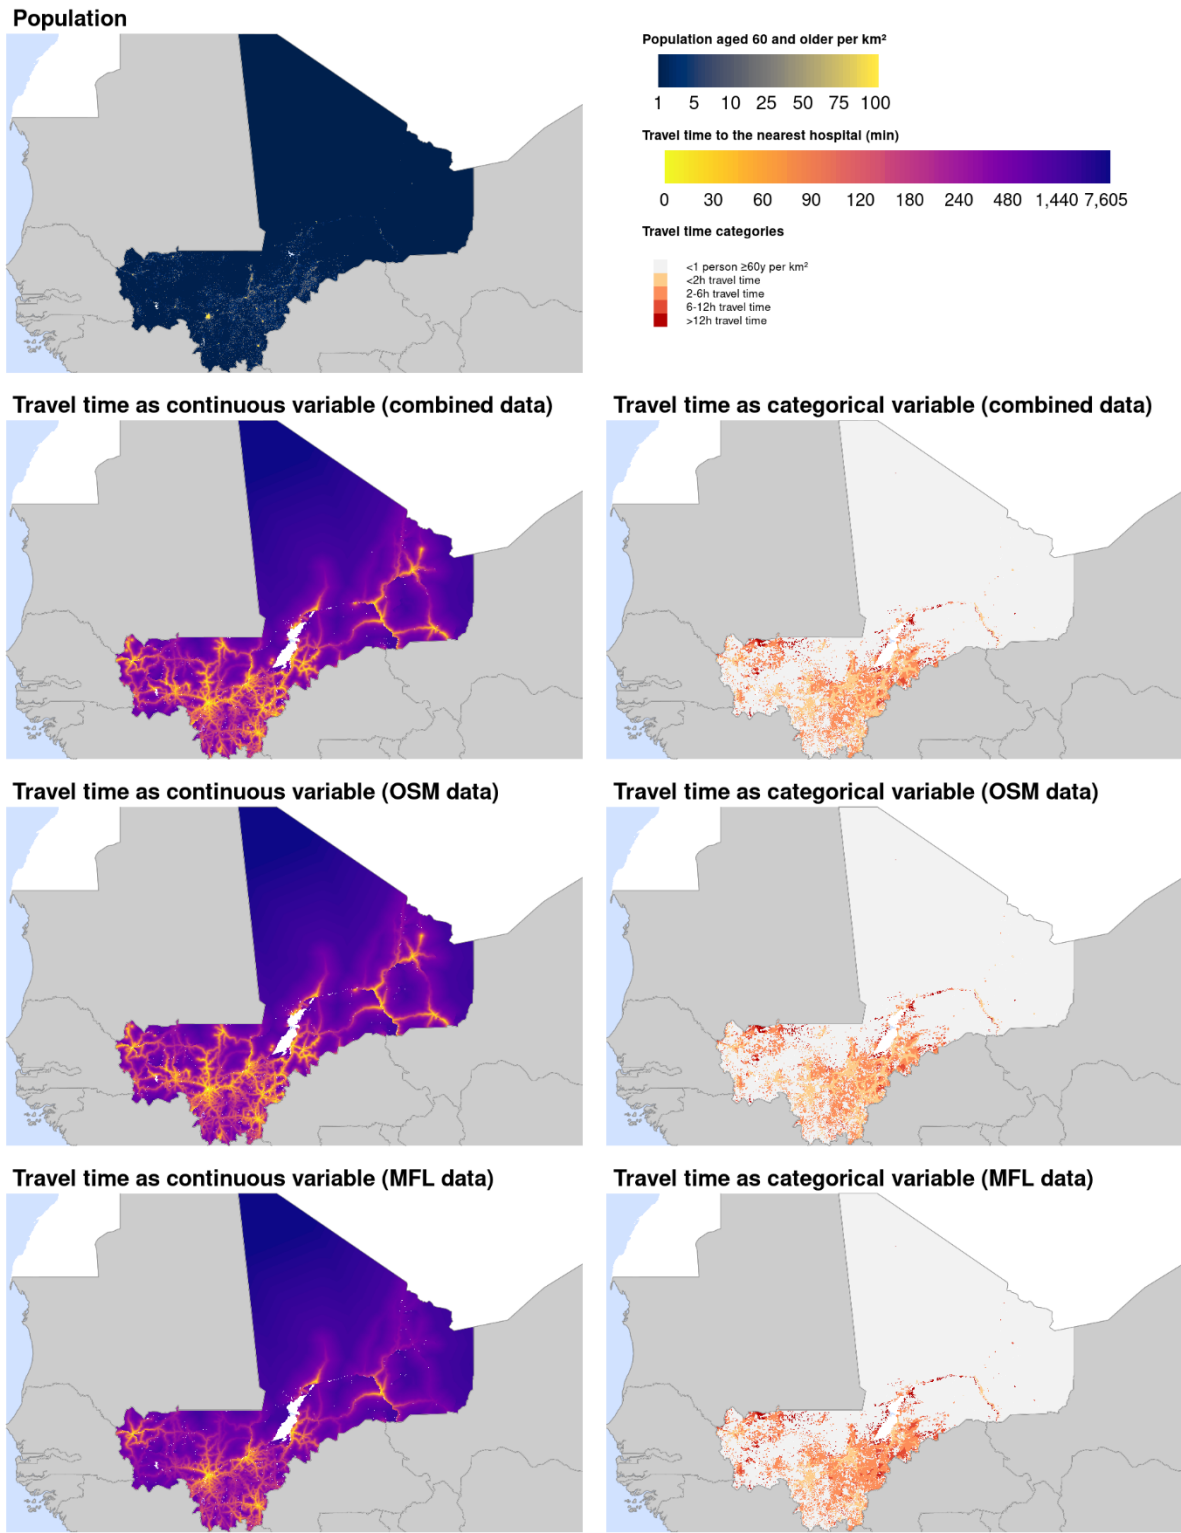



**Figure S32. Mauritania map of travel time to the nearest hospital for adults aged  $\geq 60$  years**

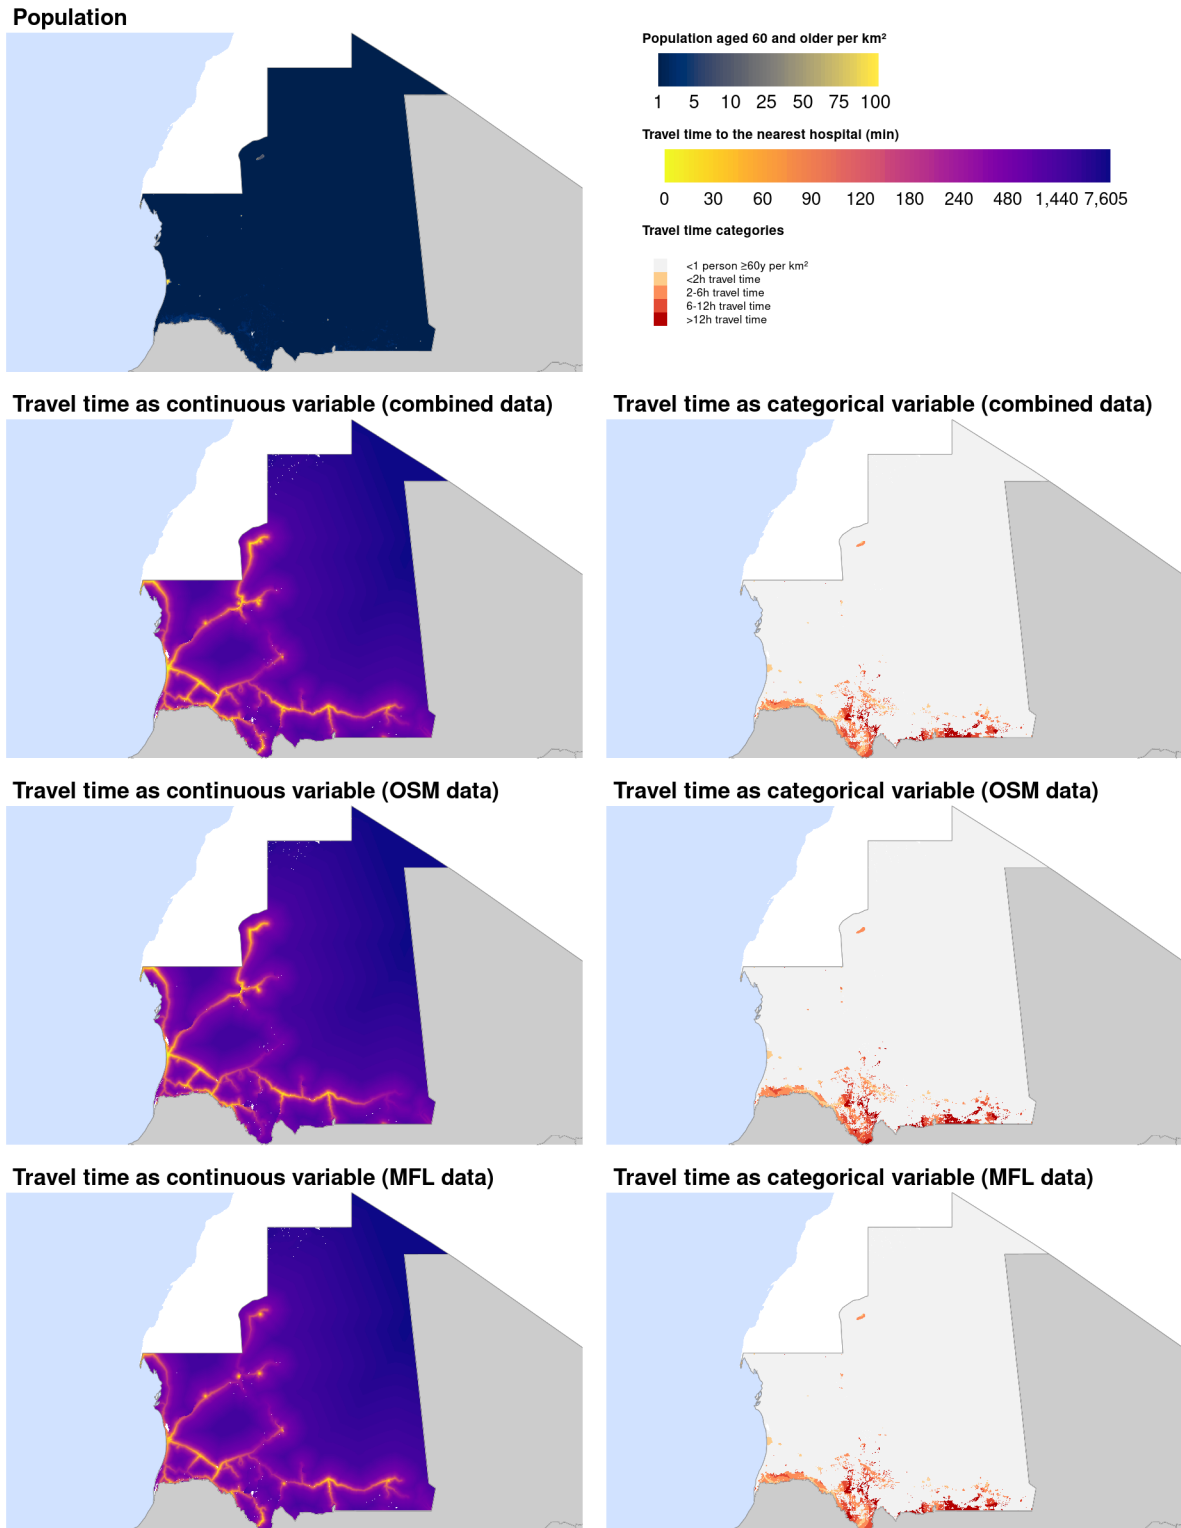

**Figure S33. Mozambique map of travel time to the nearest hospital for adults aged  $\geq 60$  years**

**Population**

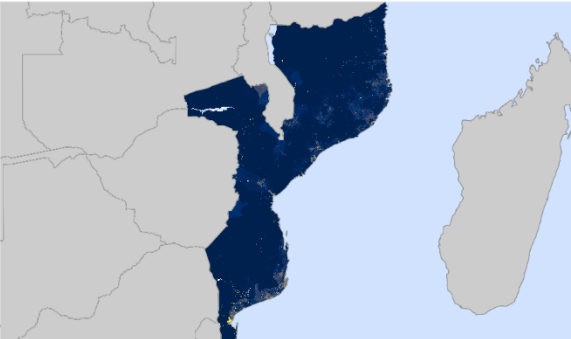

Population aged 60 and older per km<sup>2</sup>

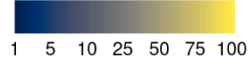

Travel time to the nearest hospital (min)

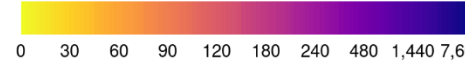

Travel time categories

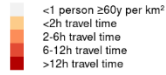

**Travel time as continuous variable (combined data)**

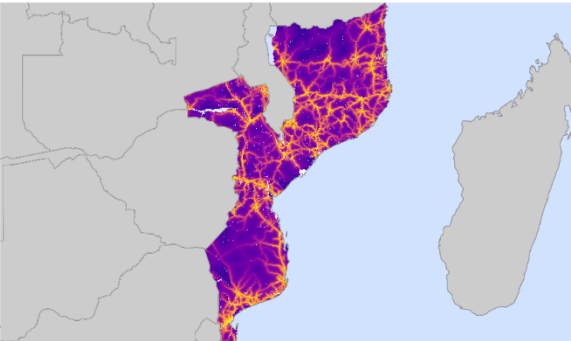

**Travel time as categorical variable (combined data)**

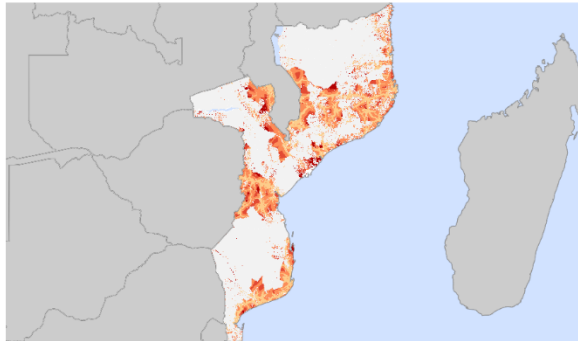

**Travel time as continuous variable (OSM data)**

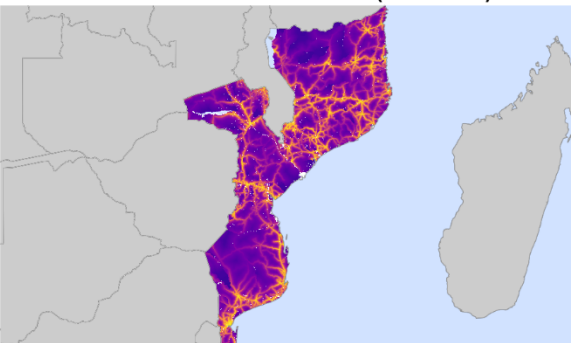

**Travel time as categorical variable (OSM data)**

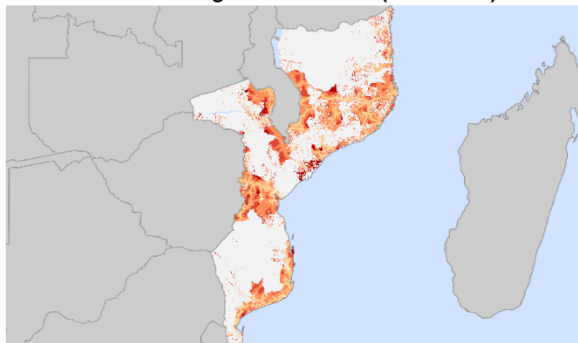

**Travel time as continuous variable (MFL data)**

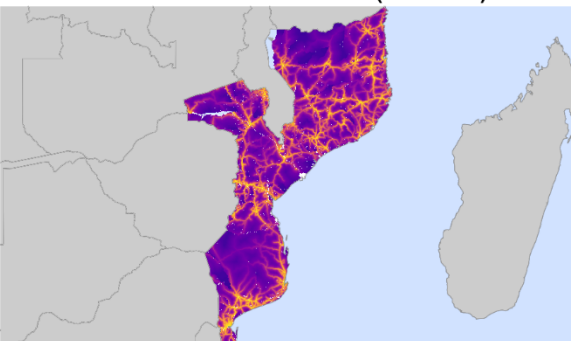

**Travel time as categorical variable (MFL data)**

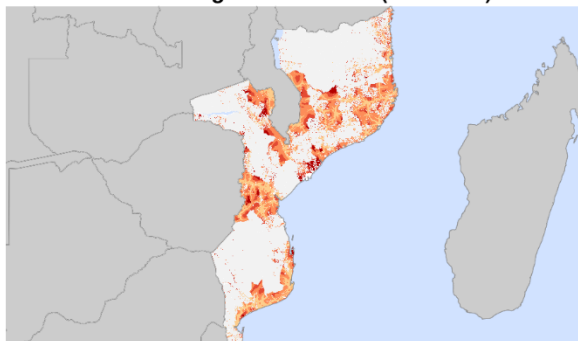

Figure S34. Namibia map of travel time to the nearest hospital for adults aged  $\geq 60$  years

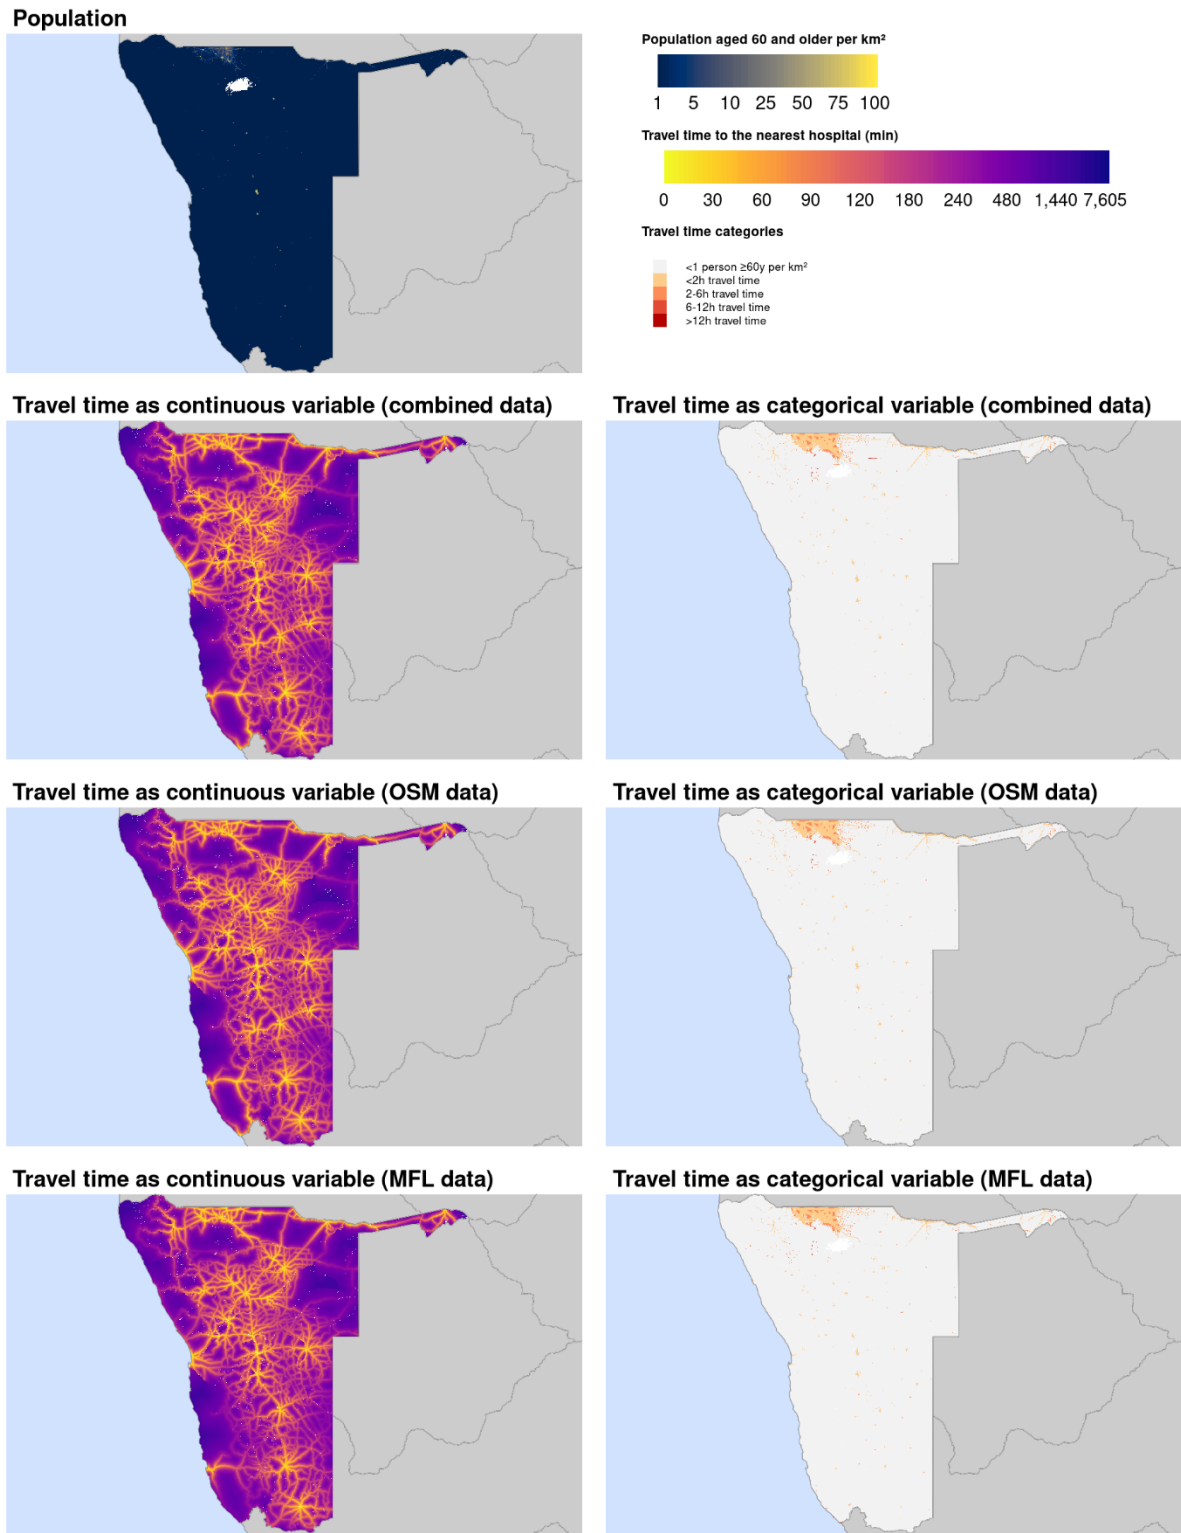

Figure S35. Niger map of travel time to the nearest hospital for adults aged  $\geq 60$  years

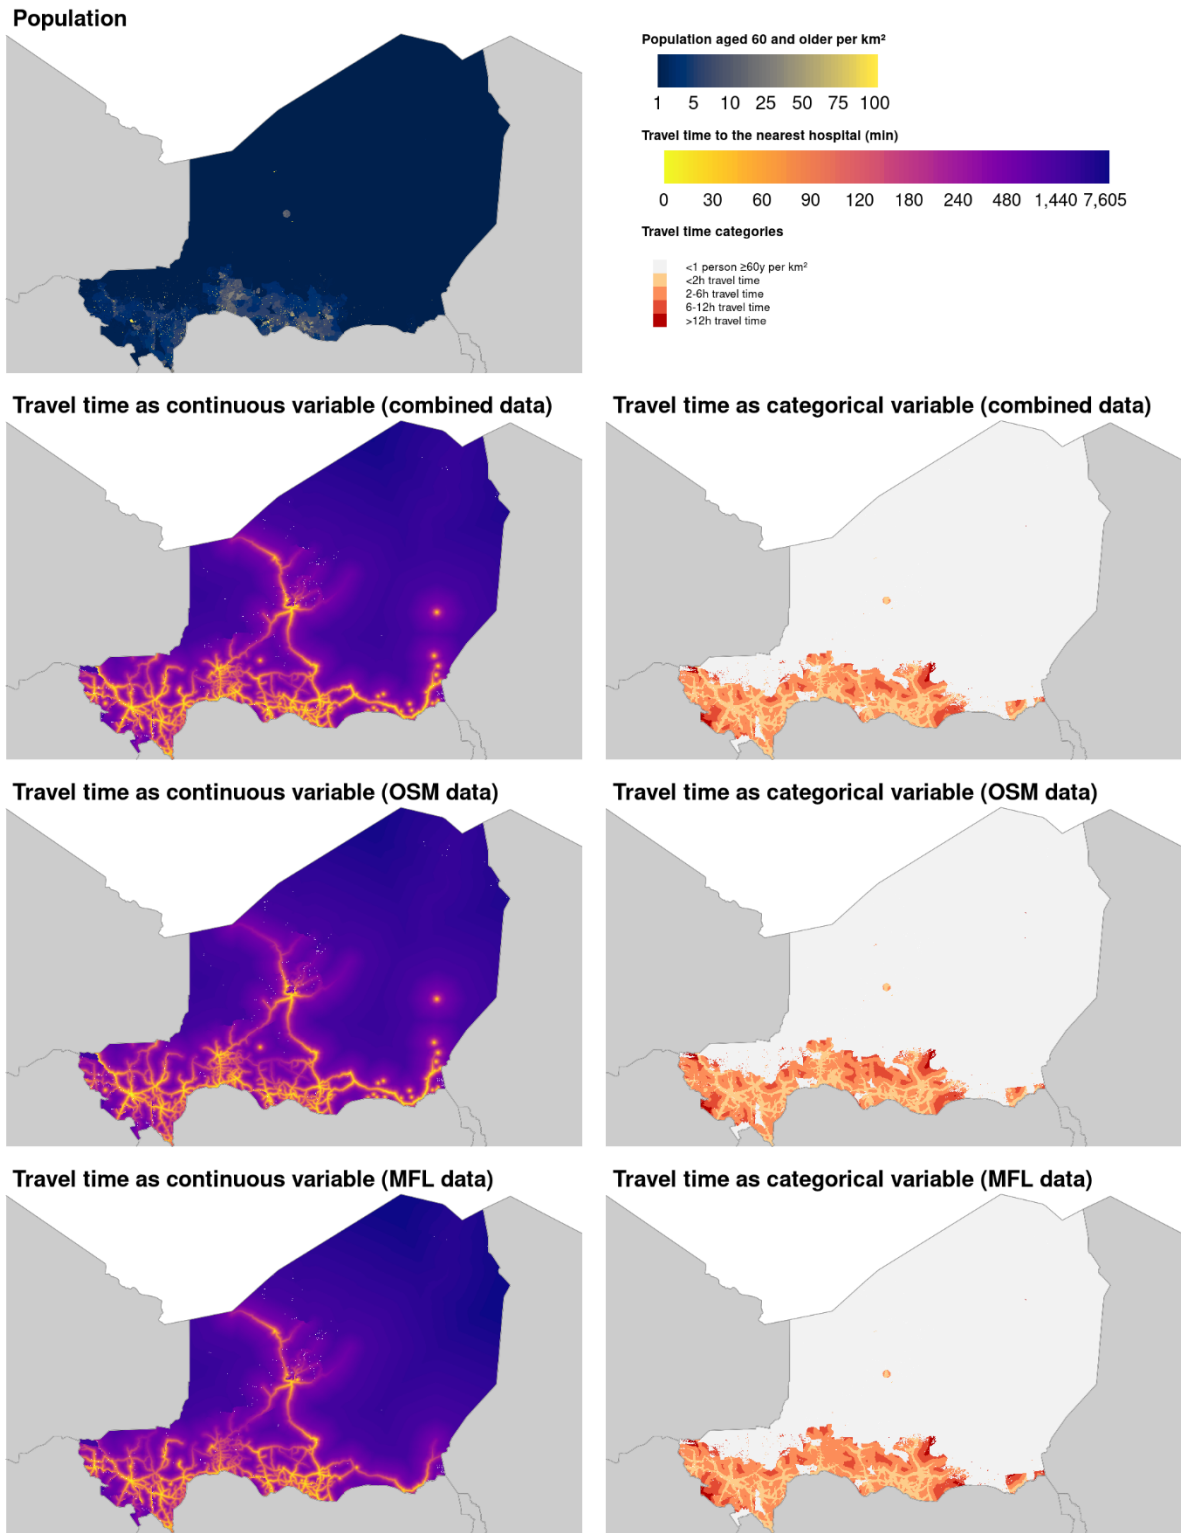

**Figure S36. Nigeria map of travel time to the nearest hospital for adults aged  $\geq 60$  years**

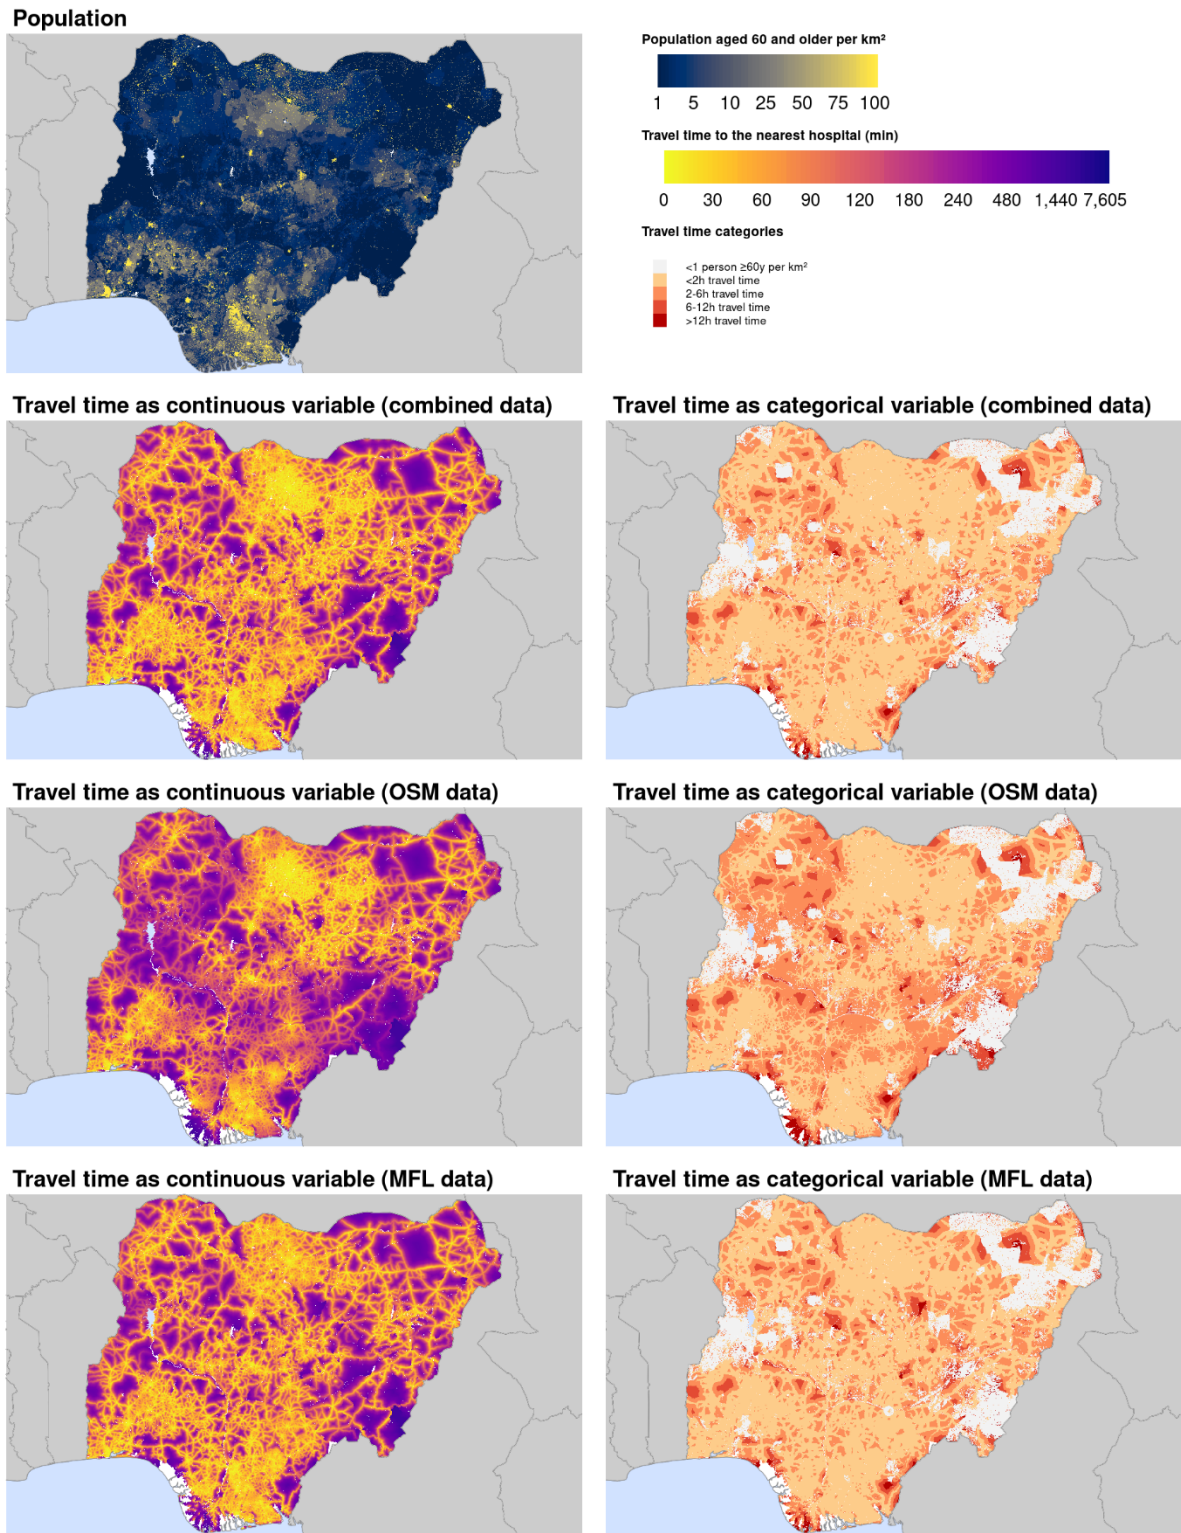

**Figure S37. Republic of the Congo map of travel time to the nearest hospital for adults aged  $\geq 60$  years**

**Population**

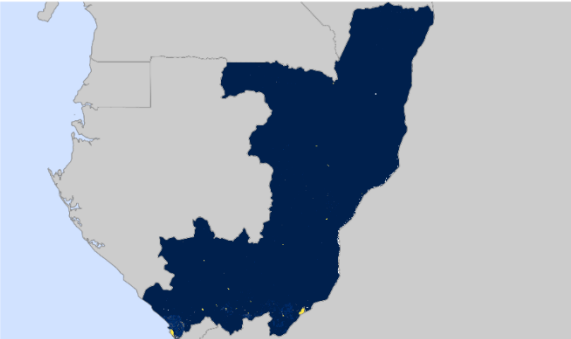

Population aged 60 and older per km<sup>2</sup>

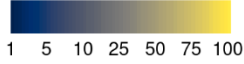

Travel time to the nearest hospital (min)

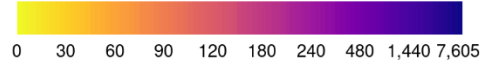

Travel time categories

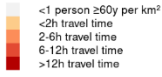

**Travel time as continuous variable (combined data)**

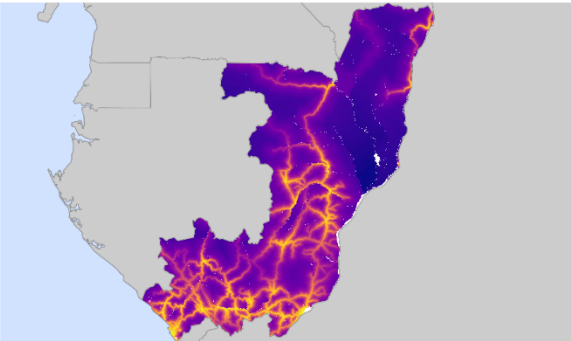

**Travel time as categorical variable (combined data)**

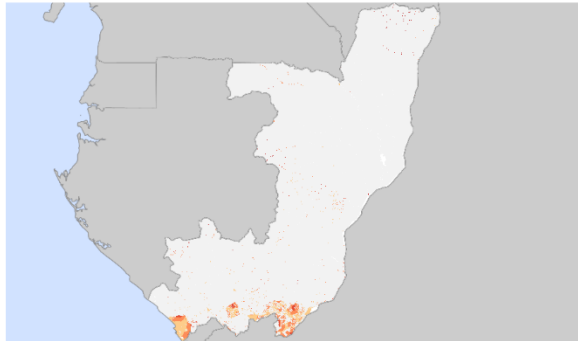

**Travel time as continuous variable (OSM data)**

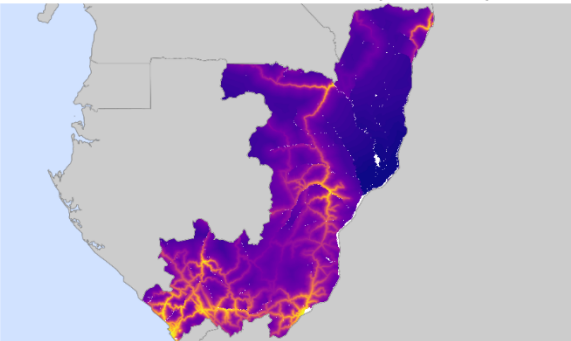

**Travel time as categorical variable (OSM data)**

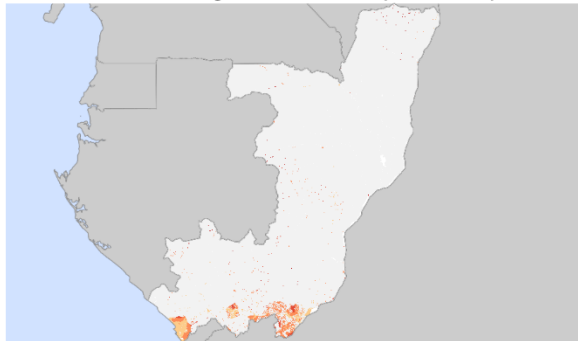

**Travel time as continuous variable (MFL data)**

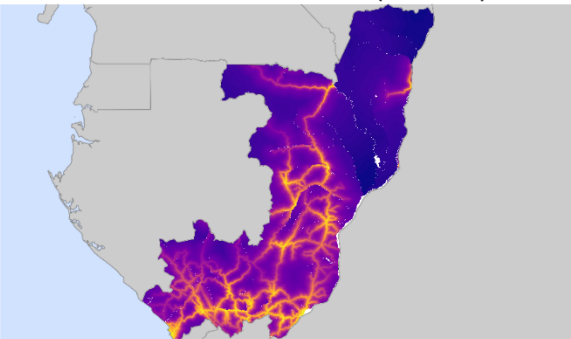

**Travel time as categorical variable (MFL data)**

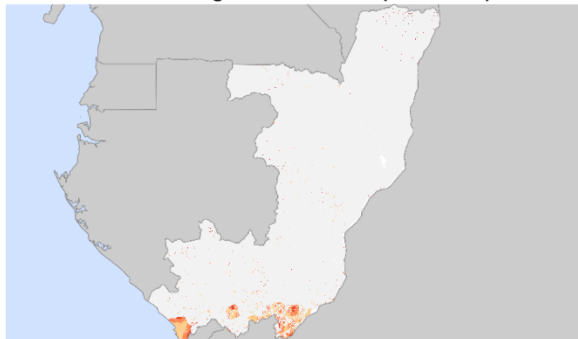

**Figure S38. Rwanda map of travel time to the nearest hospital for adults aged  $\geq 60$  years**

**Population**

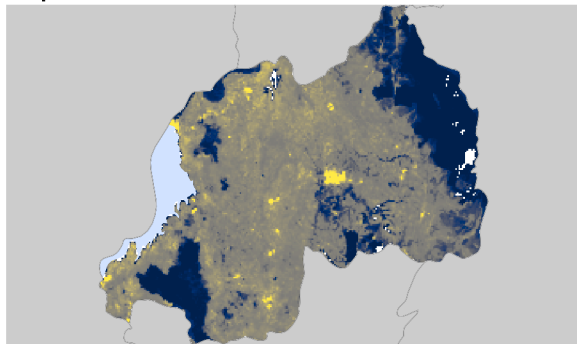

Population aged 60 and older per km<sup>2</sup>

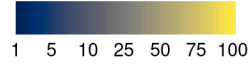

Travel time to the nearest hospital (min)

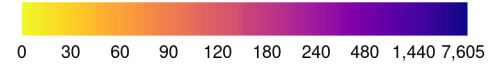

Travel time categories

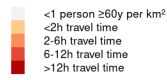

**Travel time as continuous variable (combined data)**

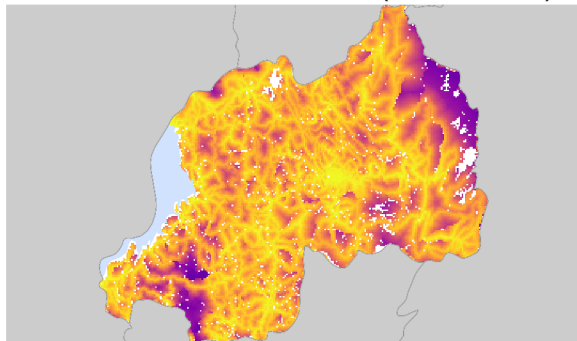

**Travel time as categorical variable (combined data)**

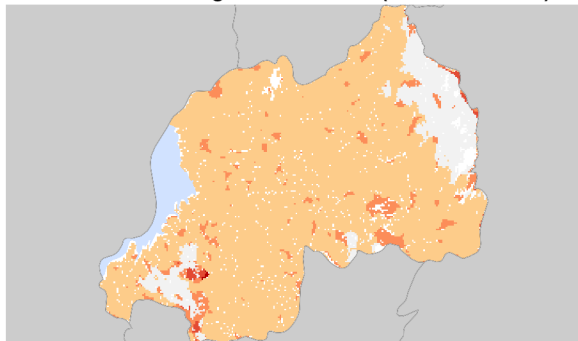

**Travel time as continuous variable (OSM data)**

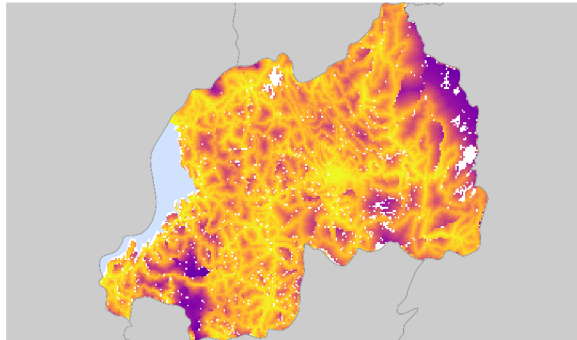

**Travel time as categorical variable (OSM data)**

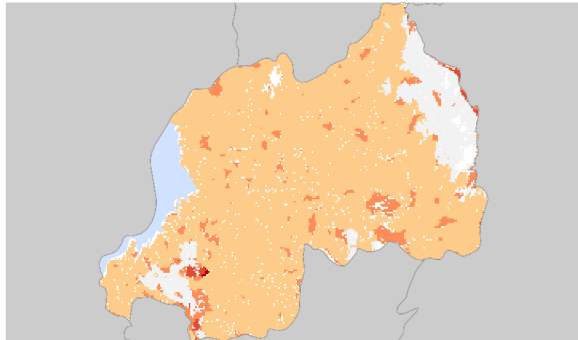

**Travel time as continuous variable (MFL data)**

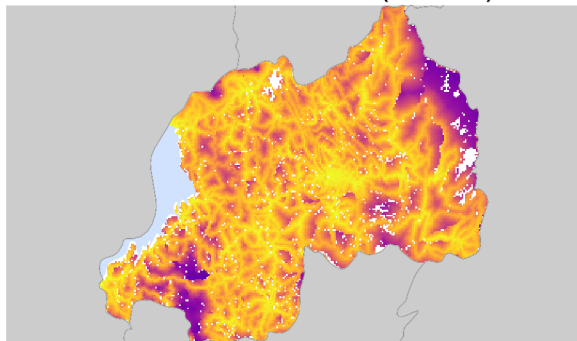

**Travel time as categorical variable (MFL data)**

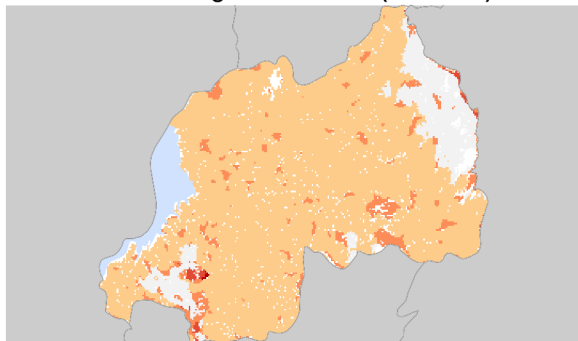

**Figure S39. Senegal map of travel time to the nearest hospital for adults aged  $\geq 60$  years**

**Population**

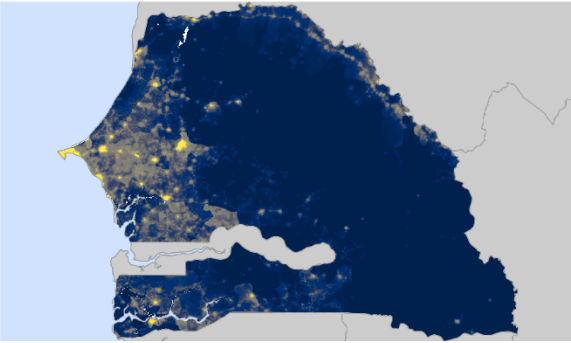

Population aged 60 and older per km<sup>2</sup>

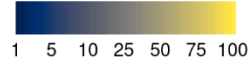

Travel time to the nearest hospital (min)

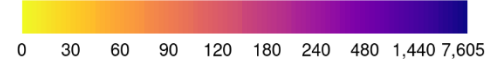

Travel time categories

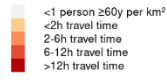

**Travel time as continuous variable (combined data)**

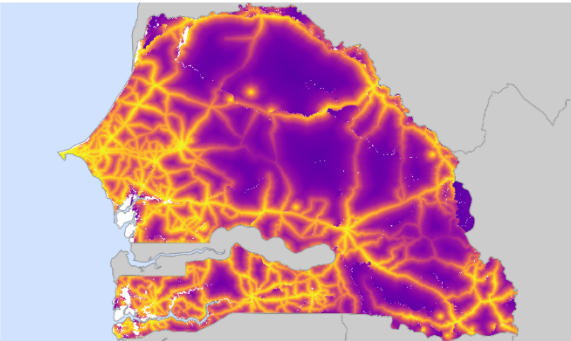

**Travel time as categorical variable (combined data)**

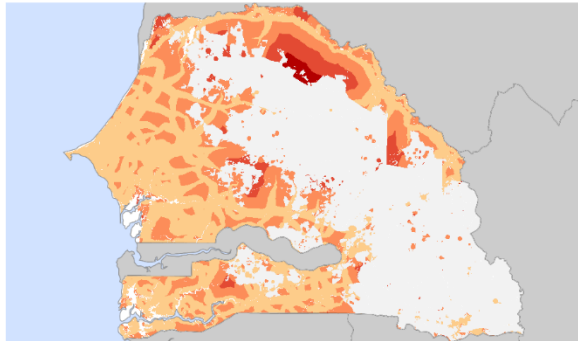

**Travel time as continuous variable (OSM data)**

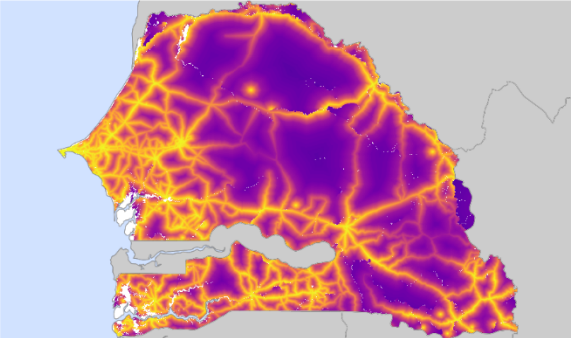

**Travel time as categorical variable (OSM data)**

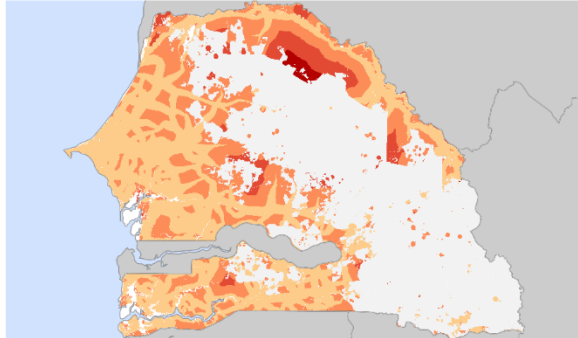

**Travel time as continuous variable (MFL data)**

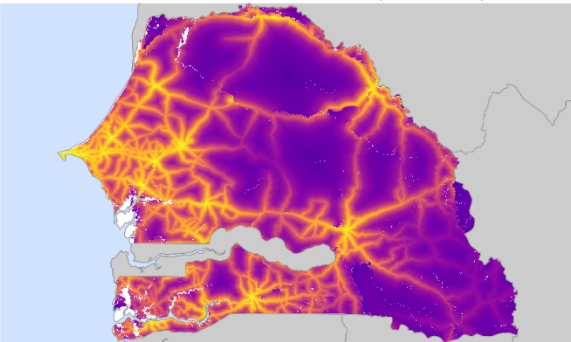

**Travel time as categorical variable (MFL data)**

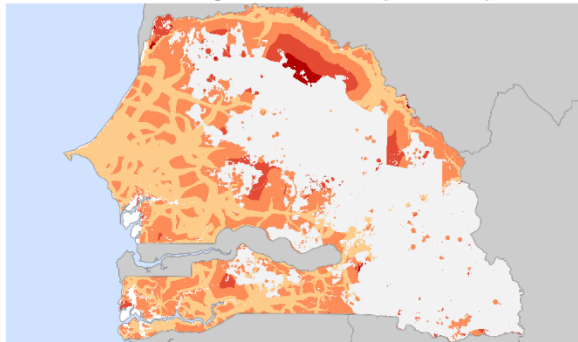



**Figure S40. Sierra Leone map of travel time to the nearest hospital for adults aged  $\geq 60$  years**

**Population**

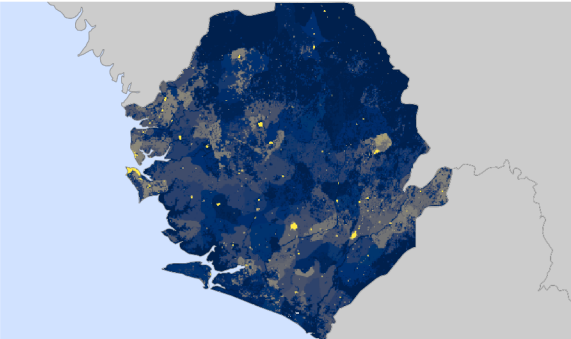

Population aged 60 and older per km<sup>2</sup>

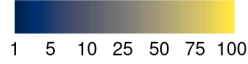

Travel time to the nearest hospital (min)

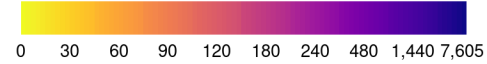

Travel time categories

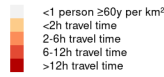

**Travel time as continuous variable (combined data)**

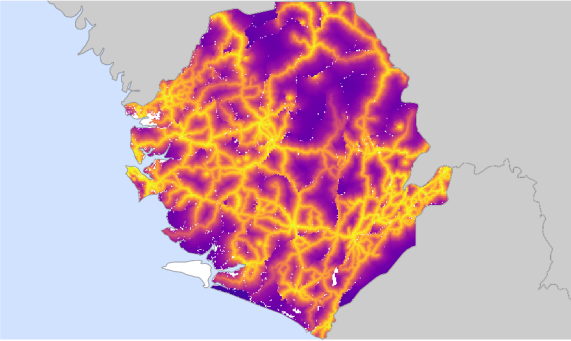

**Travel time as categorical variable (combined data)**

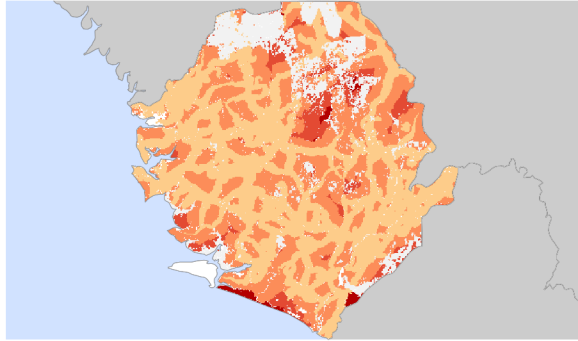

**Travel time as continuous variable (OSM data)**

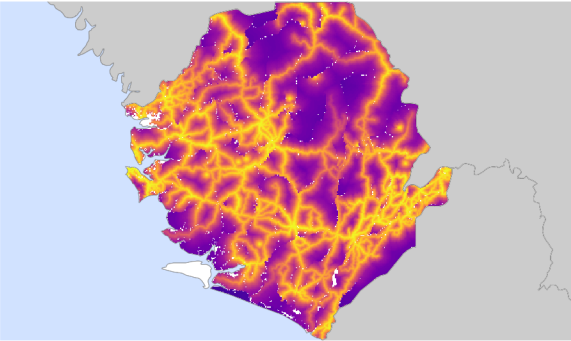

**Travel time as categorical variable (OSM data)**

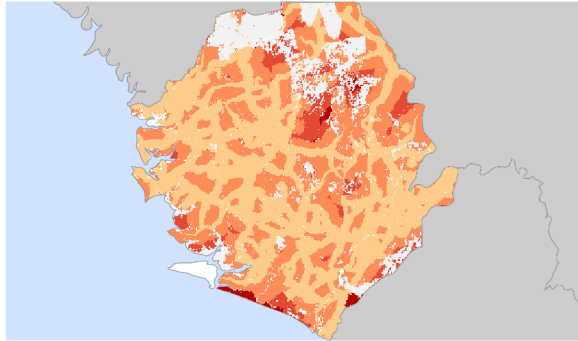

**Travel time as continuous variable (MFL data)**

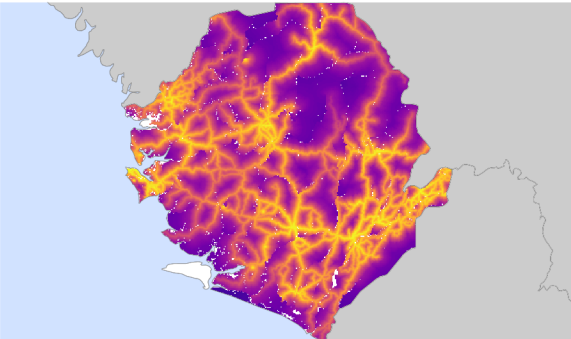

**Travel time as categorical variable (MFL data)**

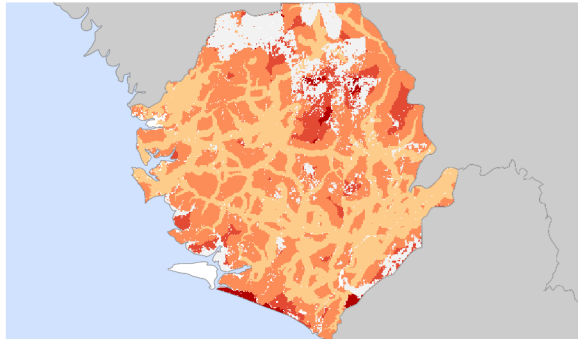

**Figure S41. Somalia map of travel time to the nearest hospital for adults aged  $\geq 60$  years**

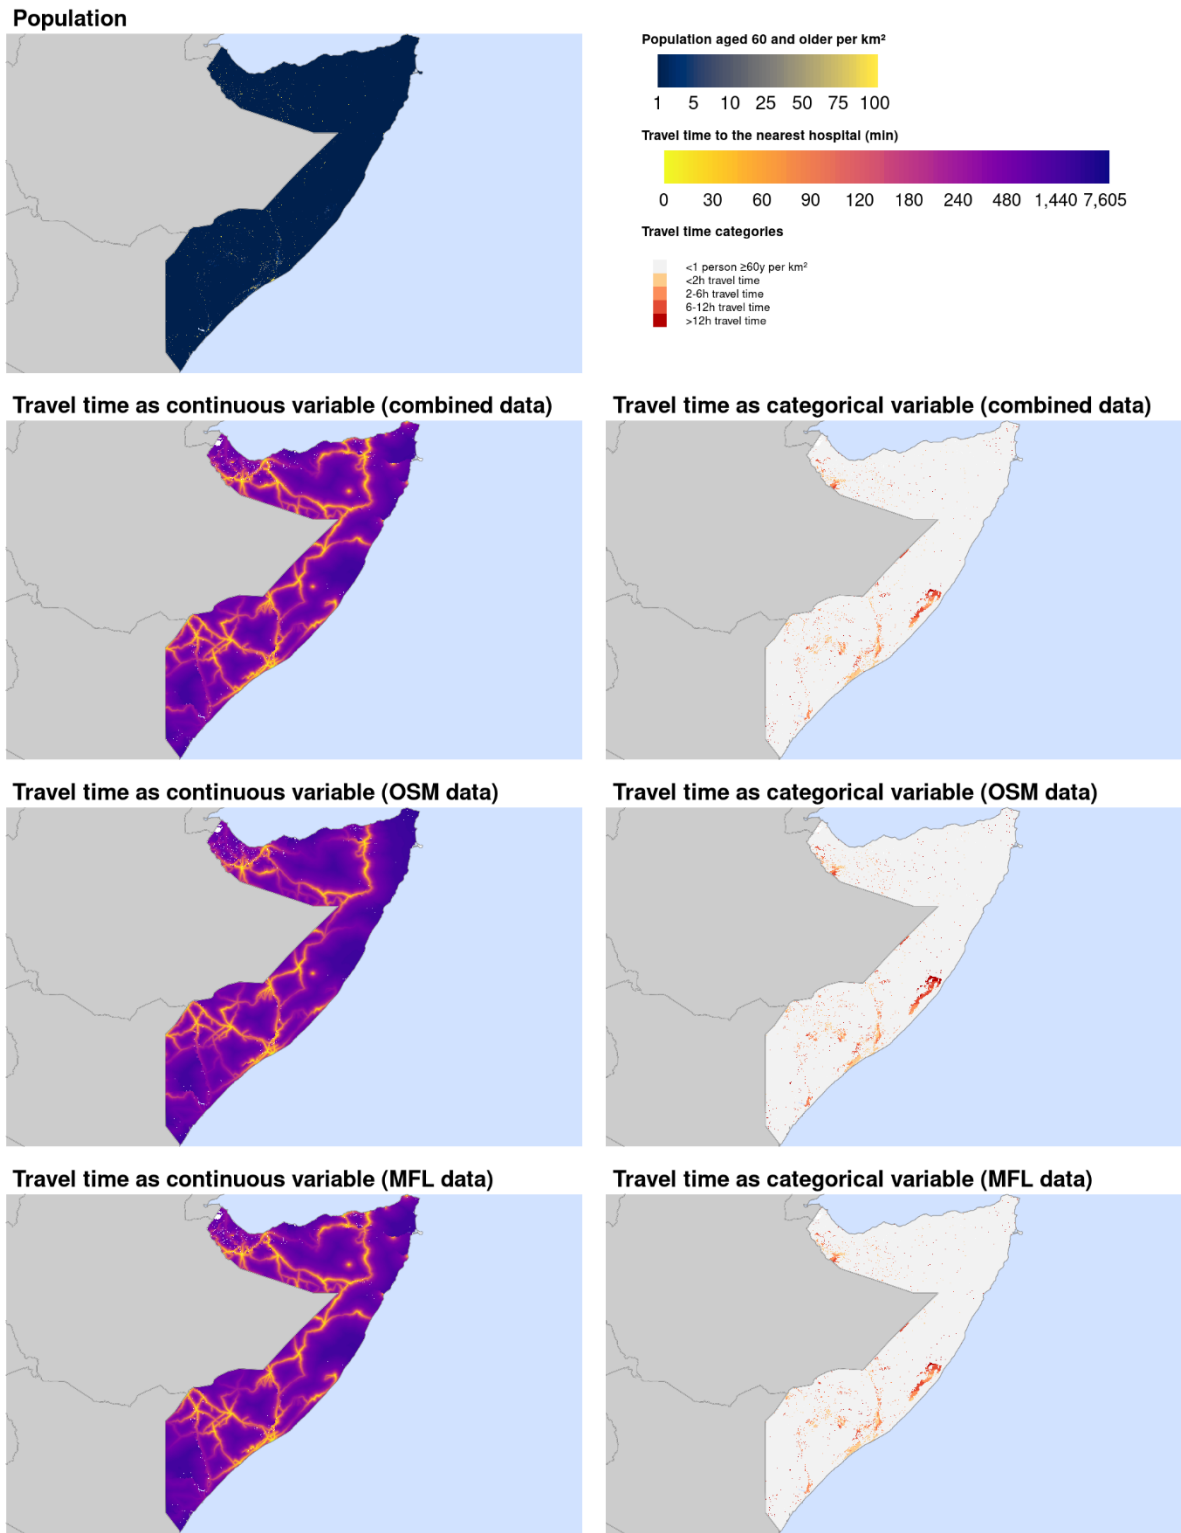

**Figure S42. South Africa map of travel time to the nearest hospital for adults aged  $\geq 60$  years**

**Population**

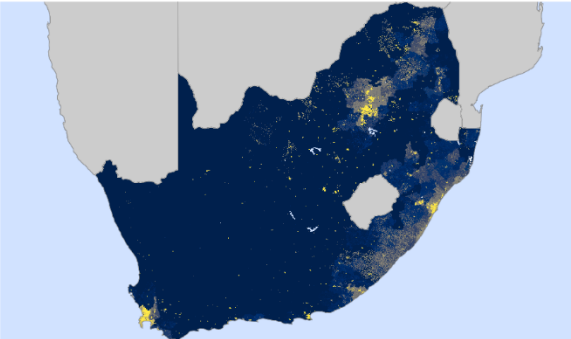

Population aged 60 and older per km<sup>2</sup>



Travel time to the nearest hospital (min)

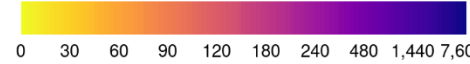

Travel time categories

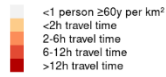

**Travel time as continuous variable (combined data)**

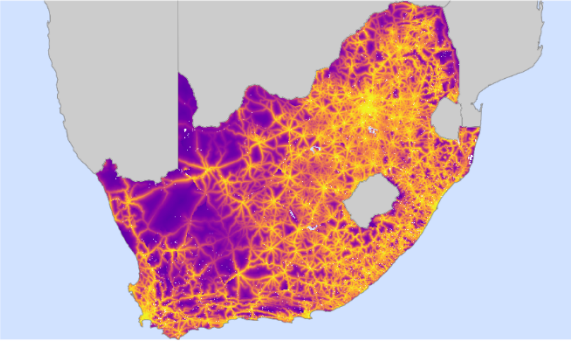

**Travel time as categorical variable (combined data)**

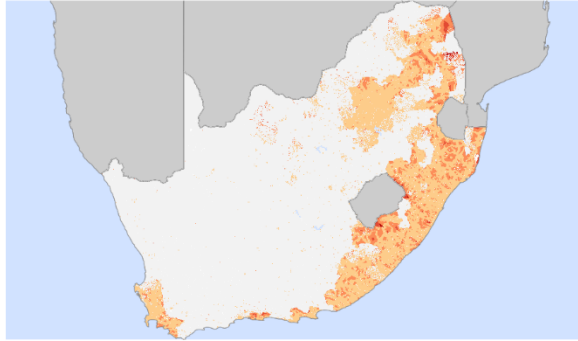

**Travel time as continuous variable (OSM data)**

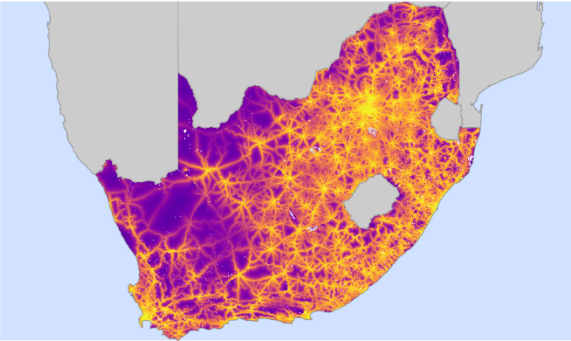

**Travel time as categorical variable (OSM data)**

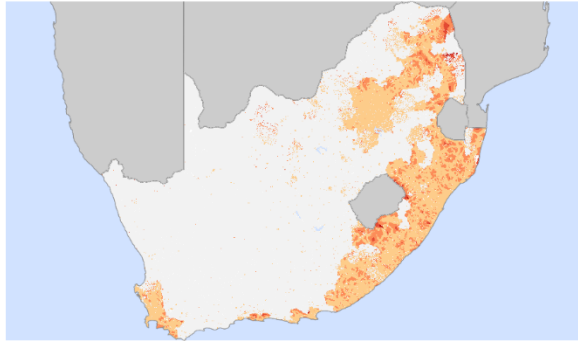

**Travel time as continuous variable (MFL data)**

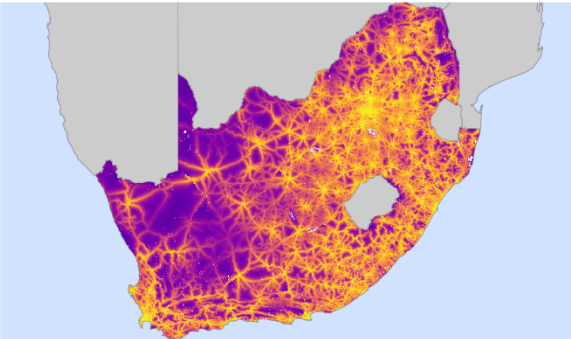

**Travel time as categorical variable (MFL data)**

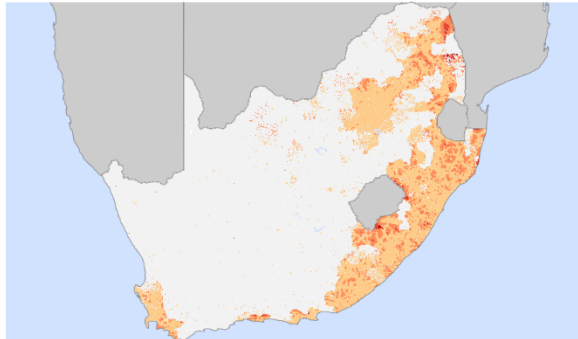

**Figure S43. South Sudan map of travel time to the nearest hospital for adults aged  $\geq 60$  years**

**Population**

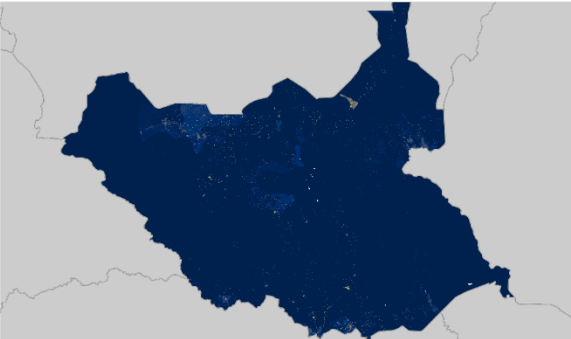

Population aged 60 and older per km<sup>2</sup>



Travel time to the nearest hospital (min)

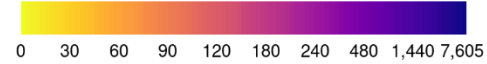

Travel time categories



**Travel time as continuous variable (combined data)**

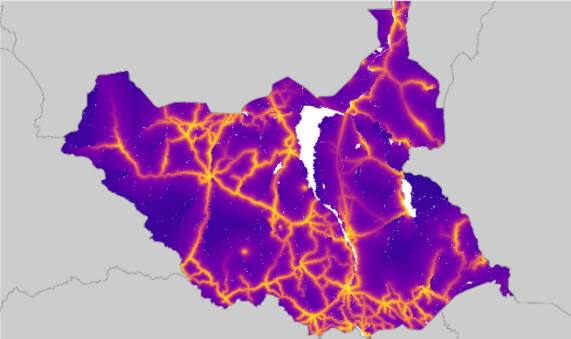

**Travel time as categorical variable (combined data)**

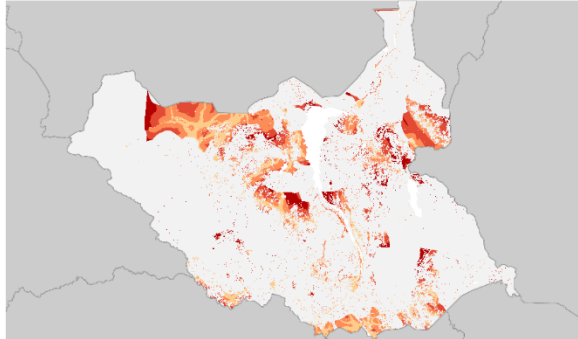

**Travel time as continuous variable (OSM data)**

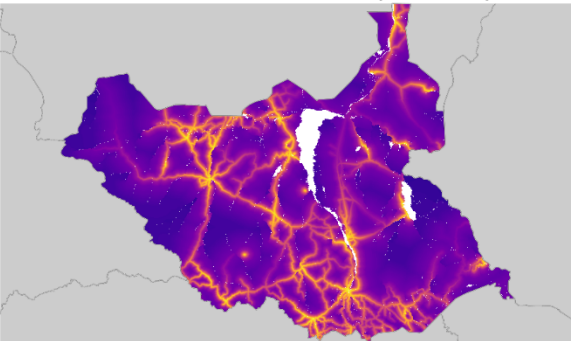

**Travel time as categorical variable (OSM data)**

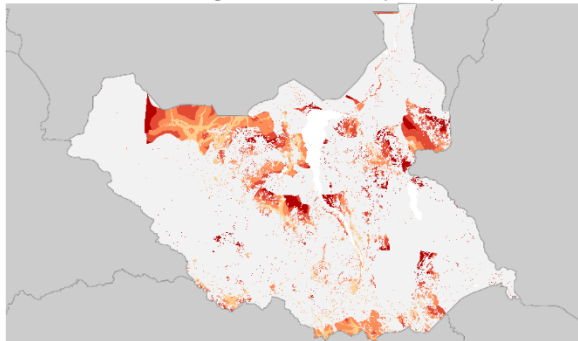

**Travel time as continuous variable (MFL data)**

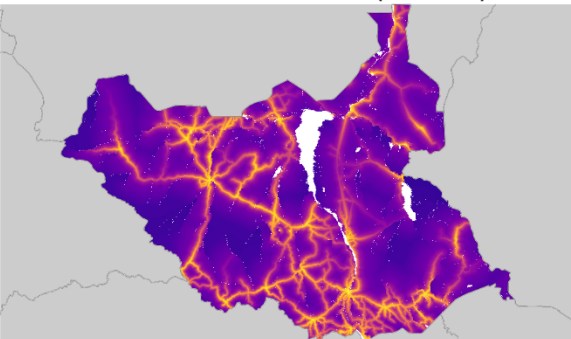

**Travel time as categorical variable (MFL data)**

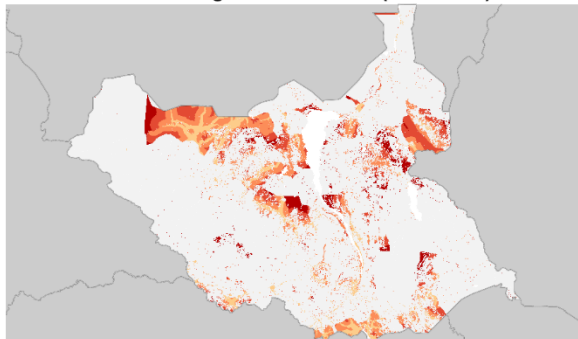

**Figure S44. Sudan map of travel time to the nearest hospital for adults aged  $\geq 60$  years**

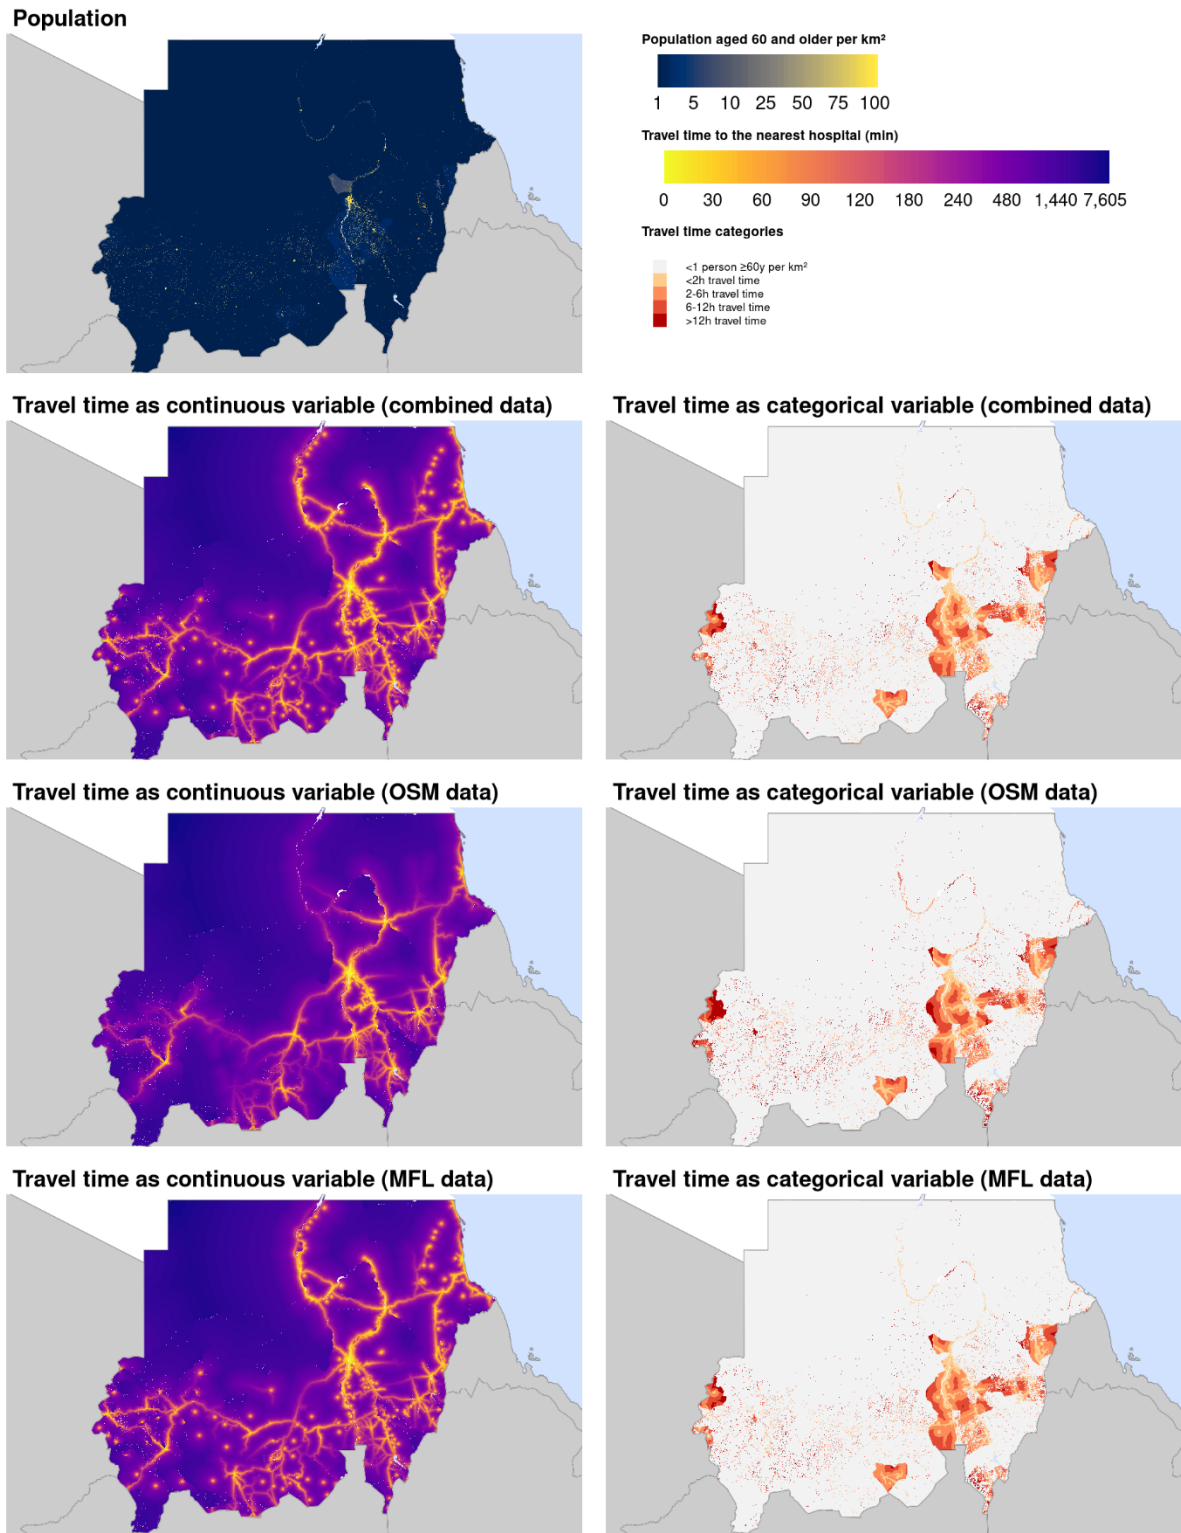

**Figure S45. Tanzania map of travel time to the nearest hospital for adults aged  $\geq 60$  years**

**Population**

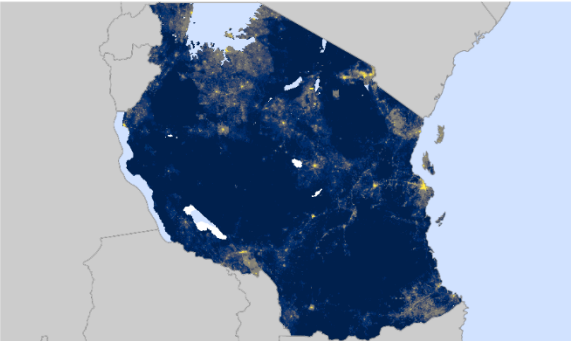

Population aged 60 and older per km<sup>2</sup>

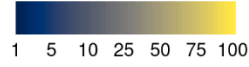

Travel time to the nearest hospital (min)



Travel time categories

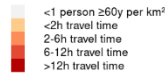

**Travel time as continuous variable (combined data)**

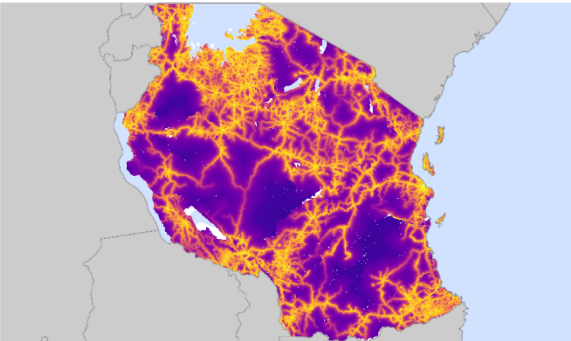

**Travel time as categorical variable (combined data)**

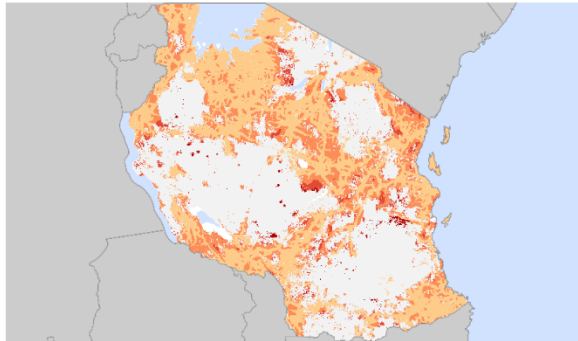

**Travel time as continuous variable (OSM data)**

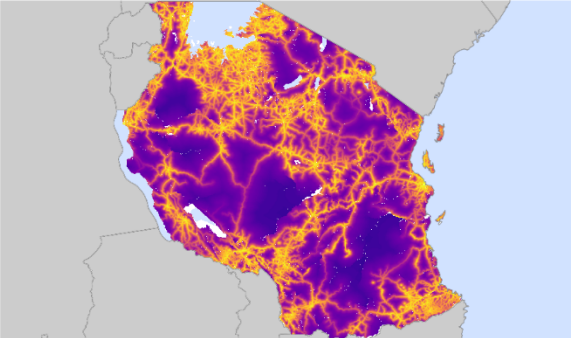

**Travel time as categorical variable (OSM data)**

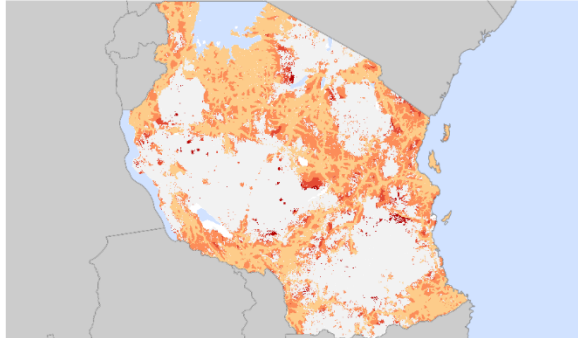

**Travel time as continuous variable (MFL data)**

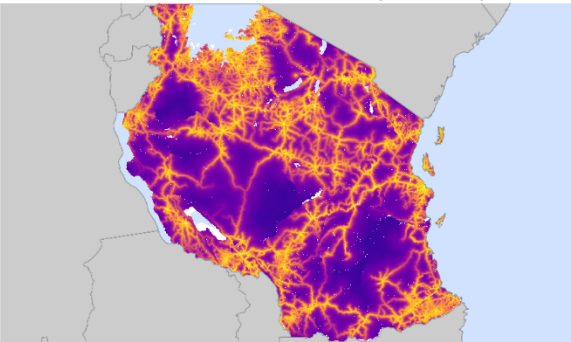

**Travel time as categorical variable (MFL data)**

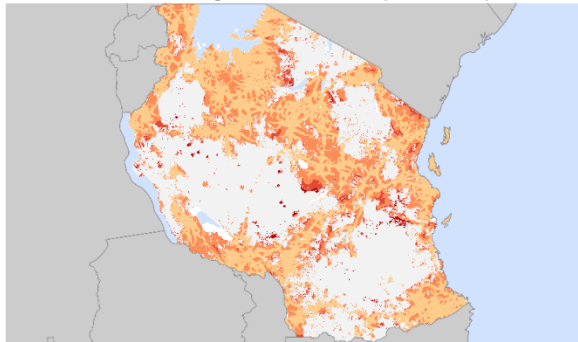

**Figure S46. The Gambia map of travel time to the nearest hospital for adults aged  $\geq 60$  years**

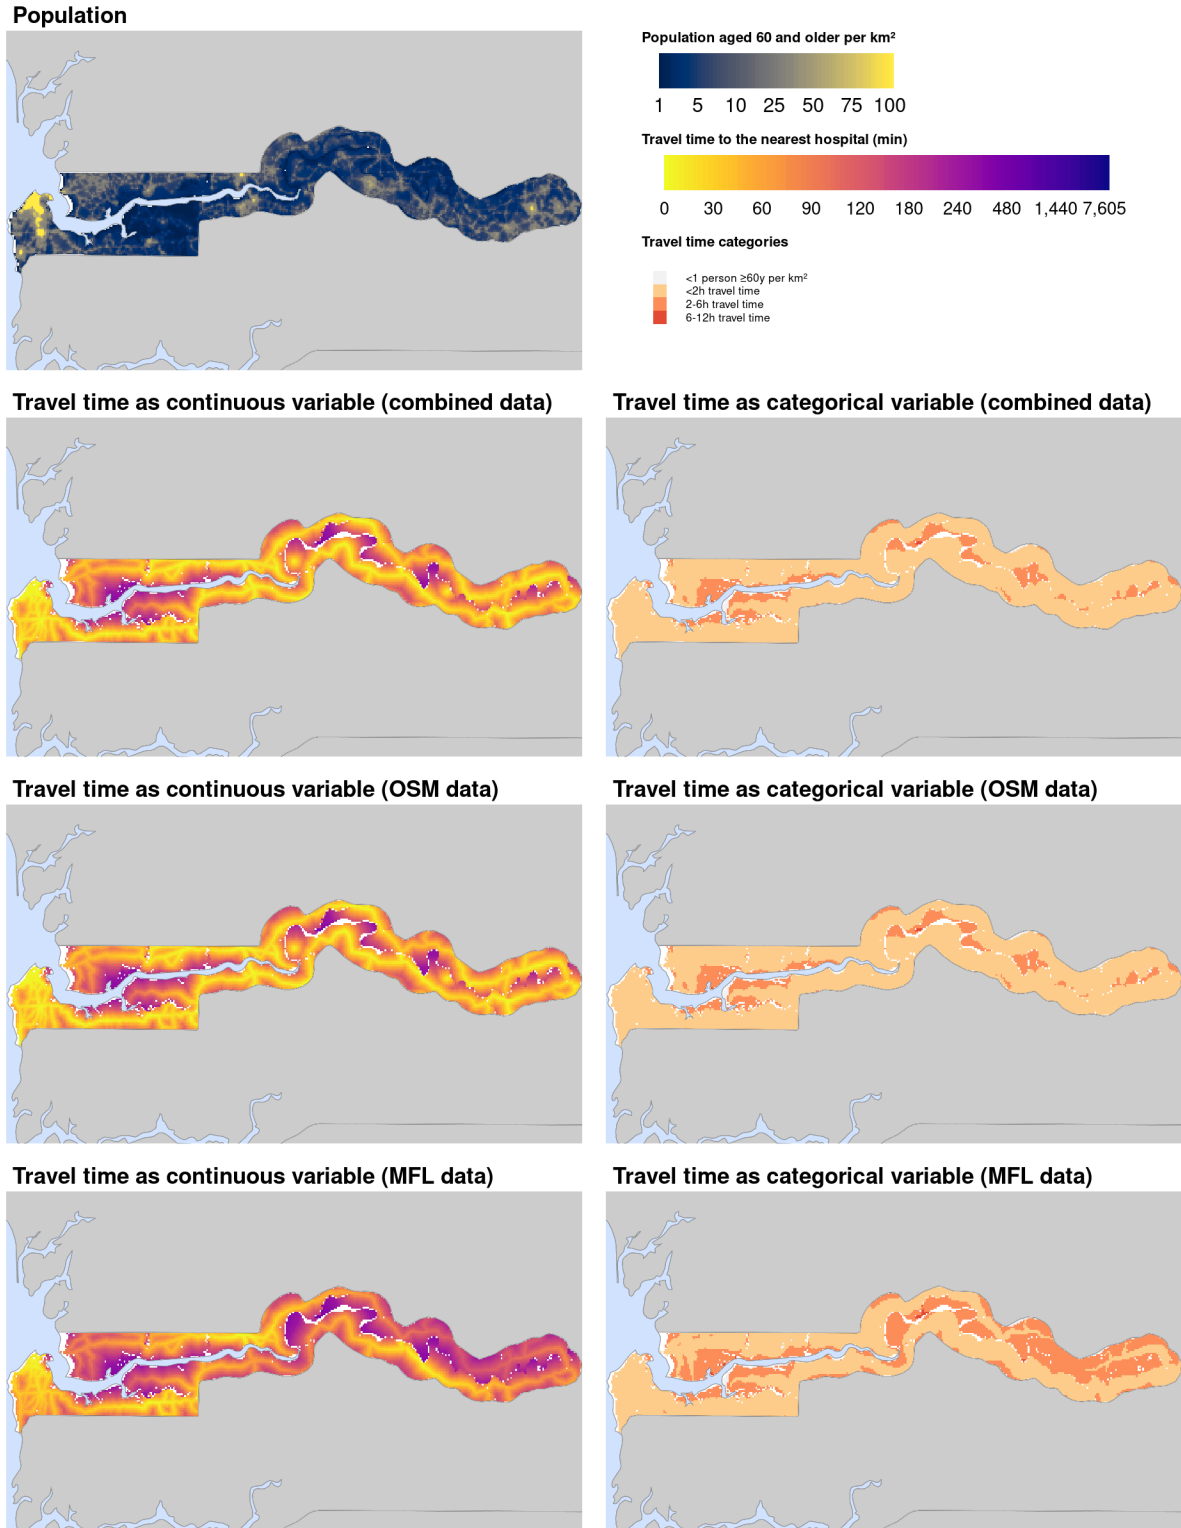

**Figure S47. Togo map of travel time to the nearest hospital for adults aged  $\geq 60$  years**

**Population**

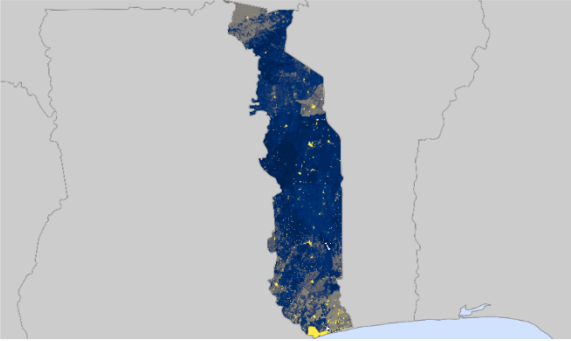

Population aged 60 and older per km<sup>2</sup>

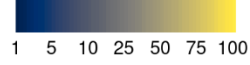

Travel time to the nearest hospital (min)

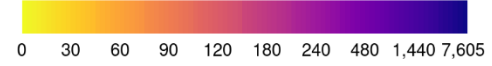

Travel time categories



**Travel time as continuous variable (combined data)**

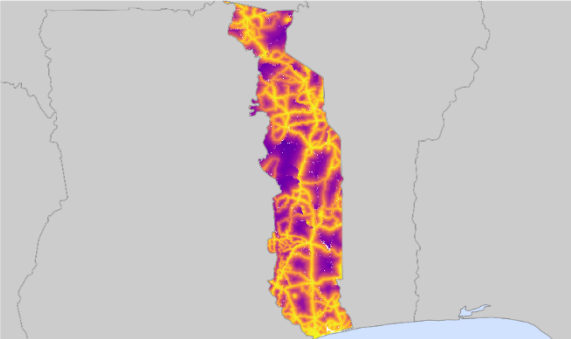

**Travel time as categorical variable (combined data)**

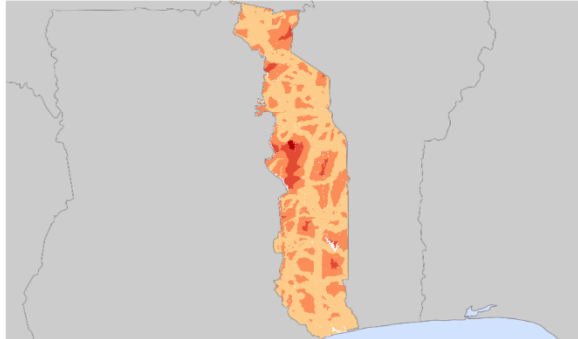

**Travel time as continuous variable (OSM data)**

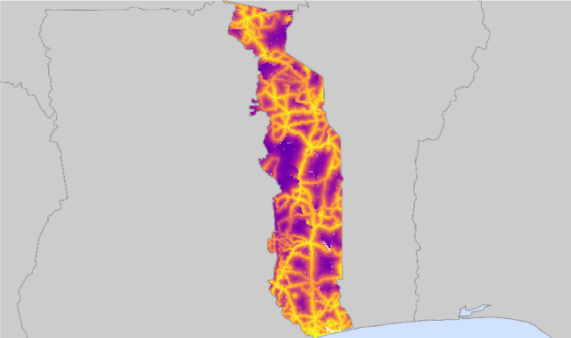

**Travel time as categorical variable (OSM data)**

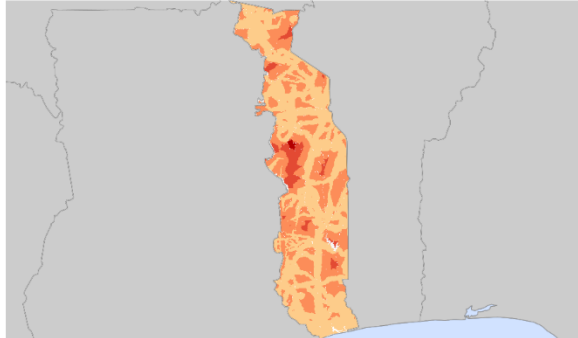

**Travel time as continuous variable (MFL data)**

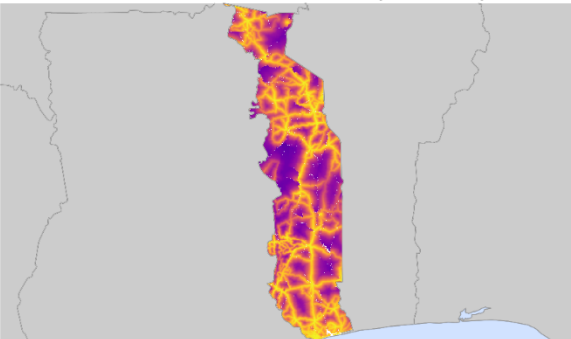

**Travel time as categorical variable (MFL data)**

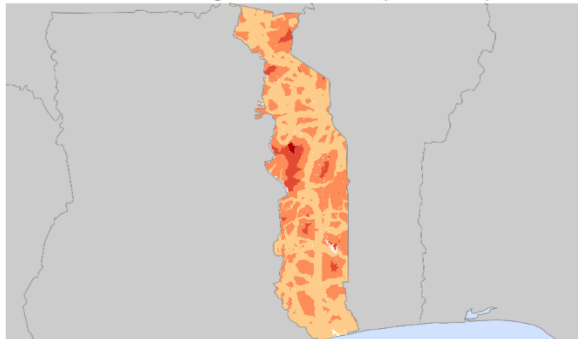



Figure S48. Uganda map of travel time to the nearest hospital for adults aged  $\geq 60$  years

Population

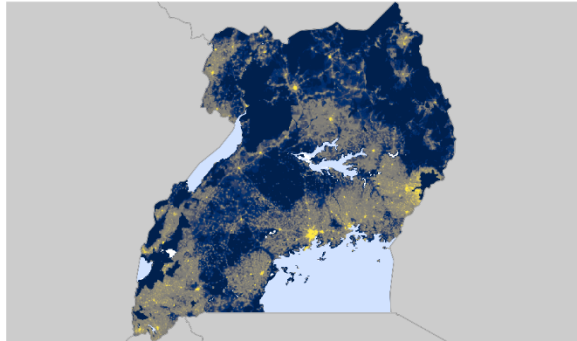

Population aged 60 and older per km<sup>2</sup>



Travel time to the nearest hospital (min)

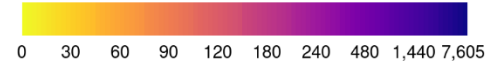

Travel time categories



Travel time as continuous variable (combined data)

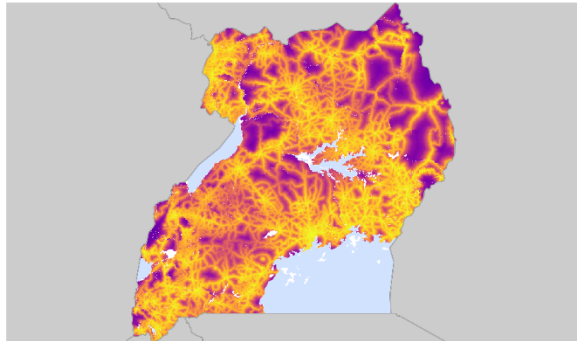

Travel time as categorical variable (combined data)

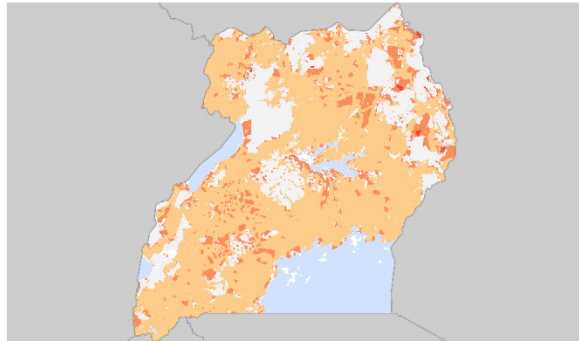

Travel time as continuous variable (OSM data)

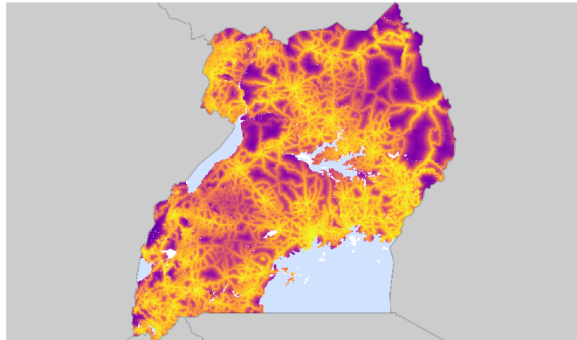

Travel time as categorical variable (OSM data)

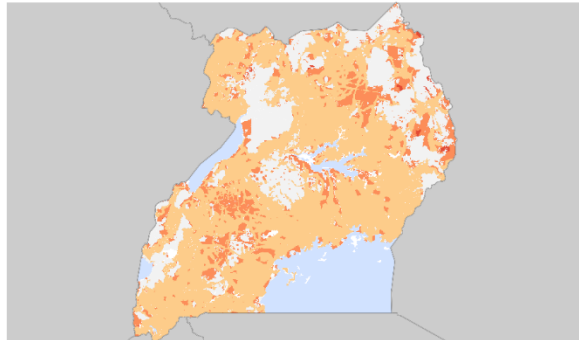

Travel time as continuous variable (MFL data)

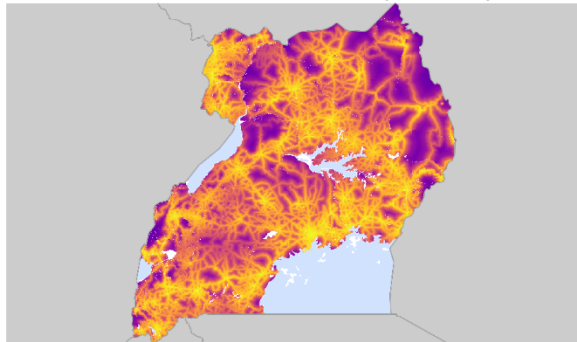

Travel time as categorical variable (MFL data)

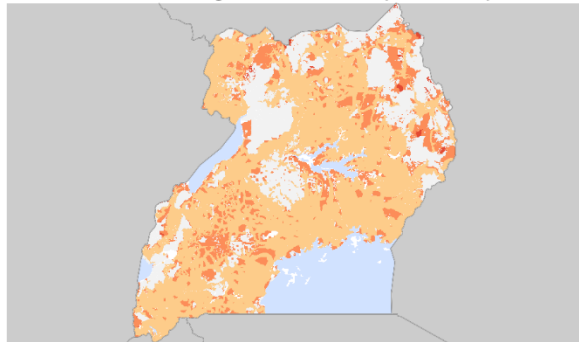

**Figure S49. Zambia map of travel time to the nearest hospital for adults aged  $\geq 60$  years**

**Population**

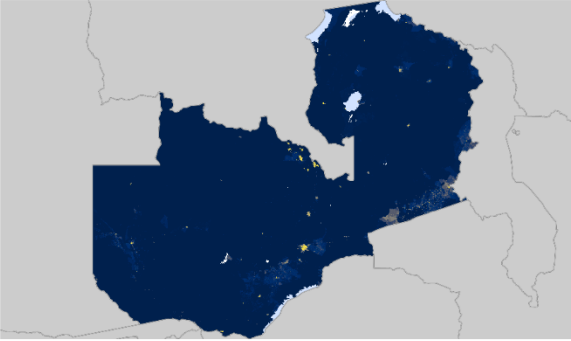

Population aged 60 and older per km<sup>2</sup>

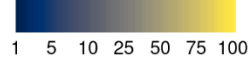

Travel time to the nearest hospital (min)

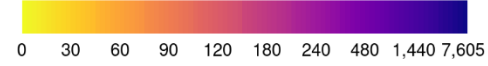

Travel time categories

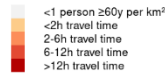

**Travel time as continuous variable (combined data)**

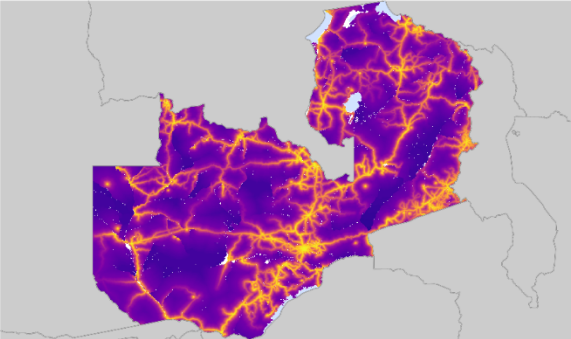

**Travel time as categorical variable (combined data)**

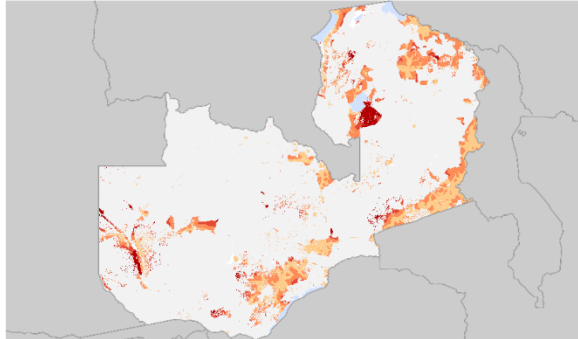

**Travel time as continuous variable (OSM data)**

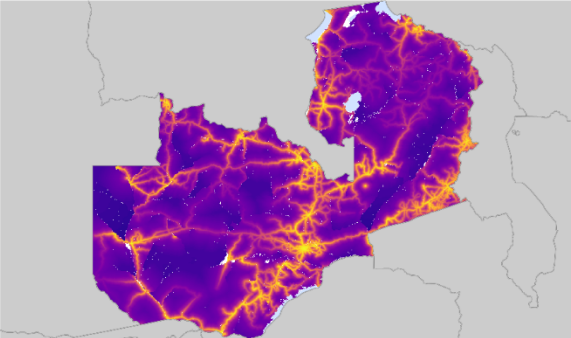

**Travel time as categorical variable (OSM data)**

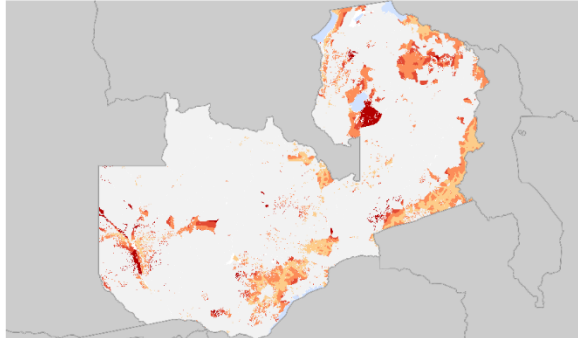

**Travel time as continuous variable (MFL data)**

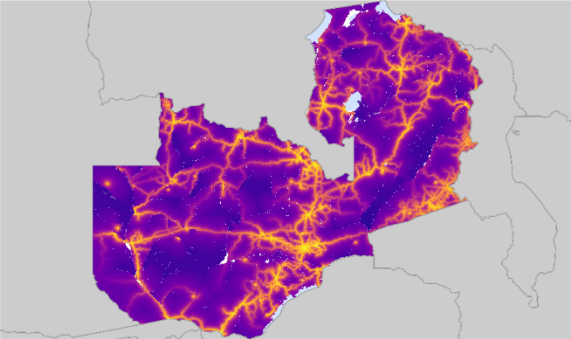

**Travel time as categorical variable (MFL data)**

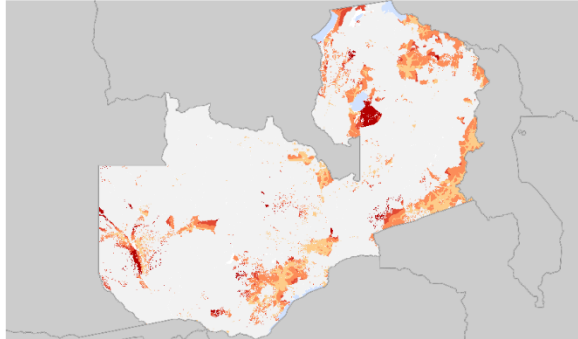

**Figure S50. Zimbabwe map of travel time to the nearest hospital for adults aged  $\geq 60$  years**

**Population**

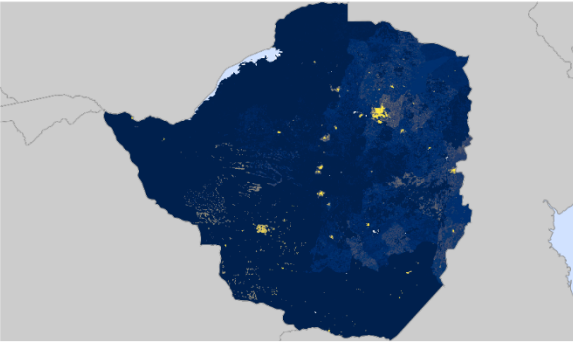

Population aged 60 and older per km<sup>2</sup>



Travel time to the nearest hospital (min)

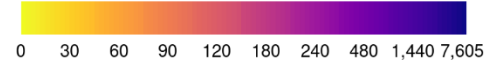

Travel time categories

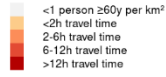

**Travel time as continuous variable (combined data)**

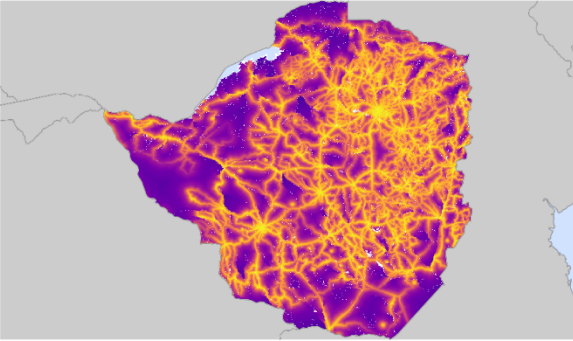

**Travel time as categorical variable (combined data)**

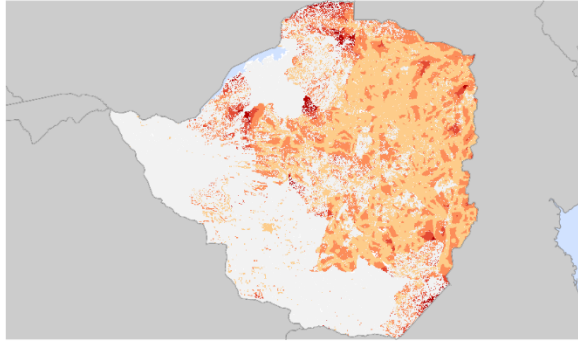

**Travel time as continuous variable (OSM data)**

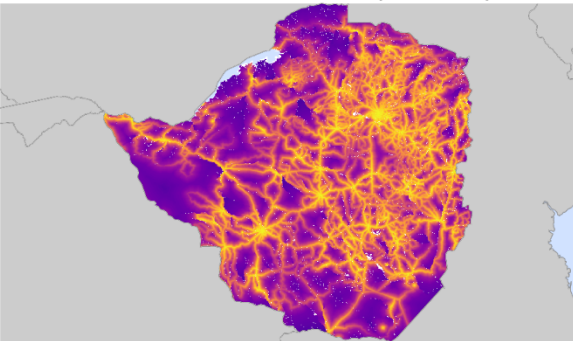

**Travel time as categorical variable (OSM data)**

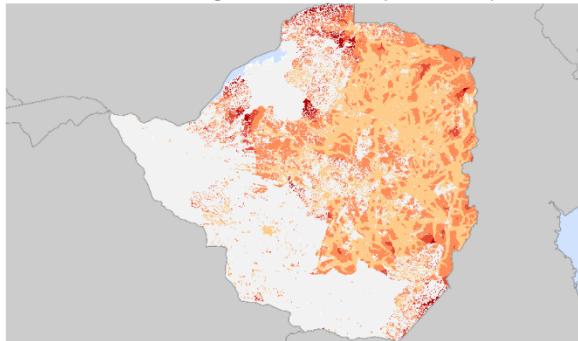

**Travel time as continuous variable (MFL data)**

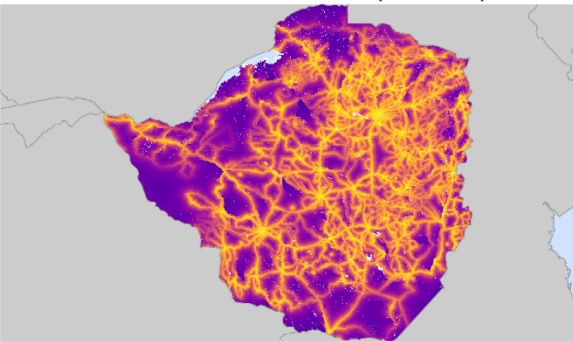

**Travel time as categorical variable (MFL data)**

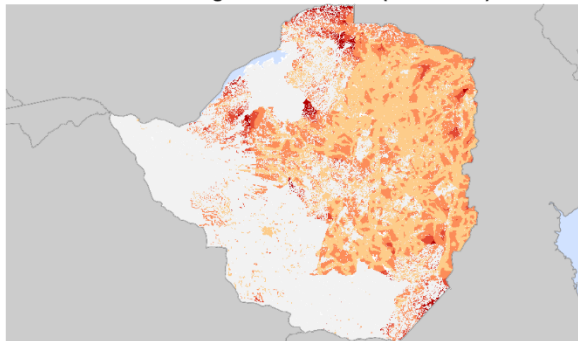

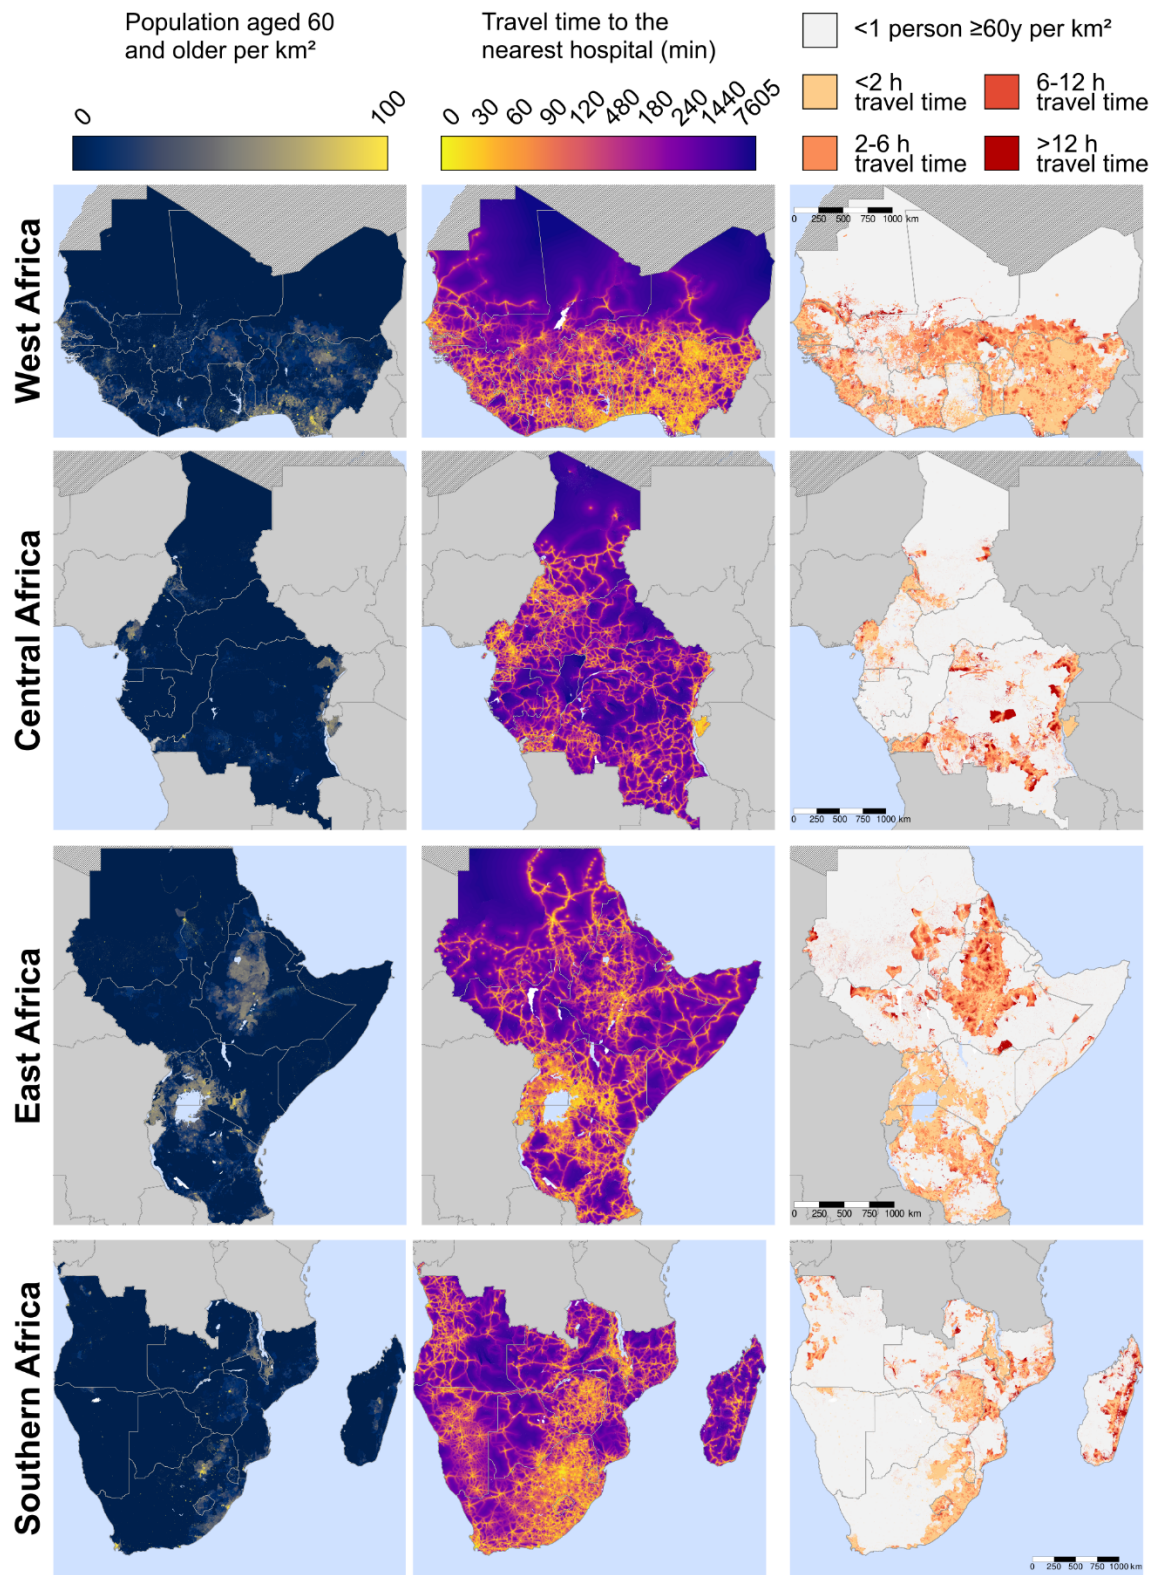

Figure S51. Maps of travel time to the nearest hospital for adults  $\geq 60$  years, by region based on the MFL dataset

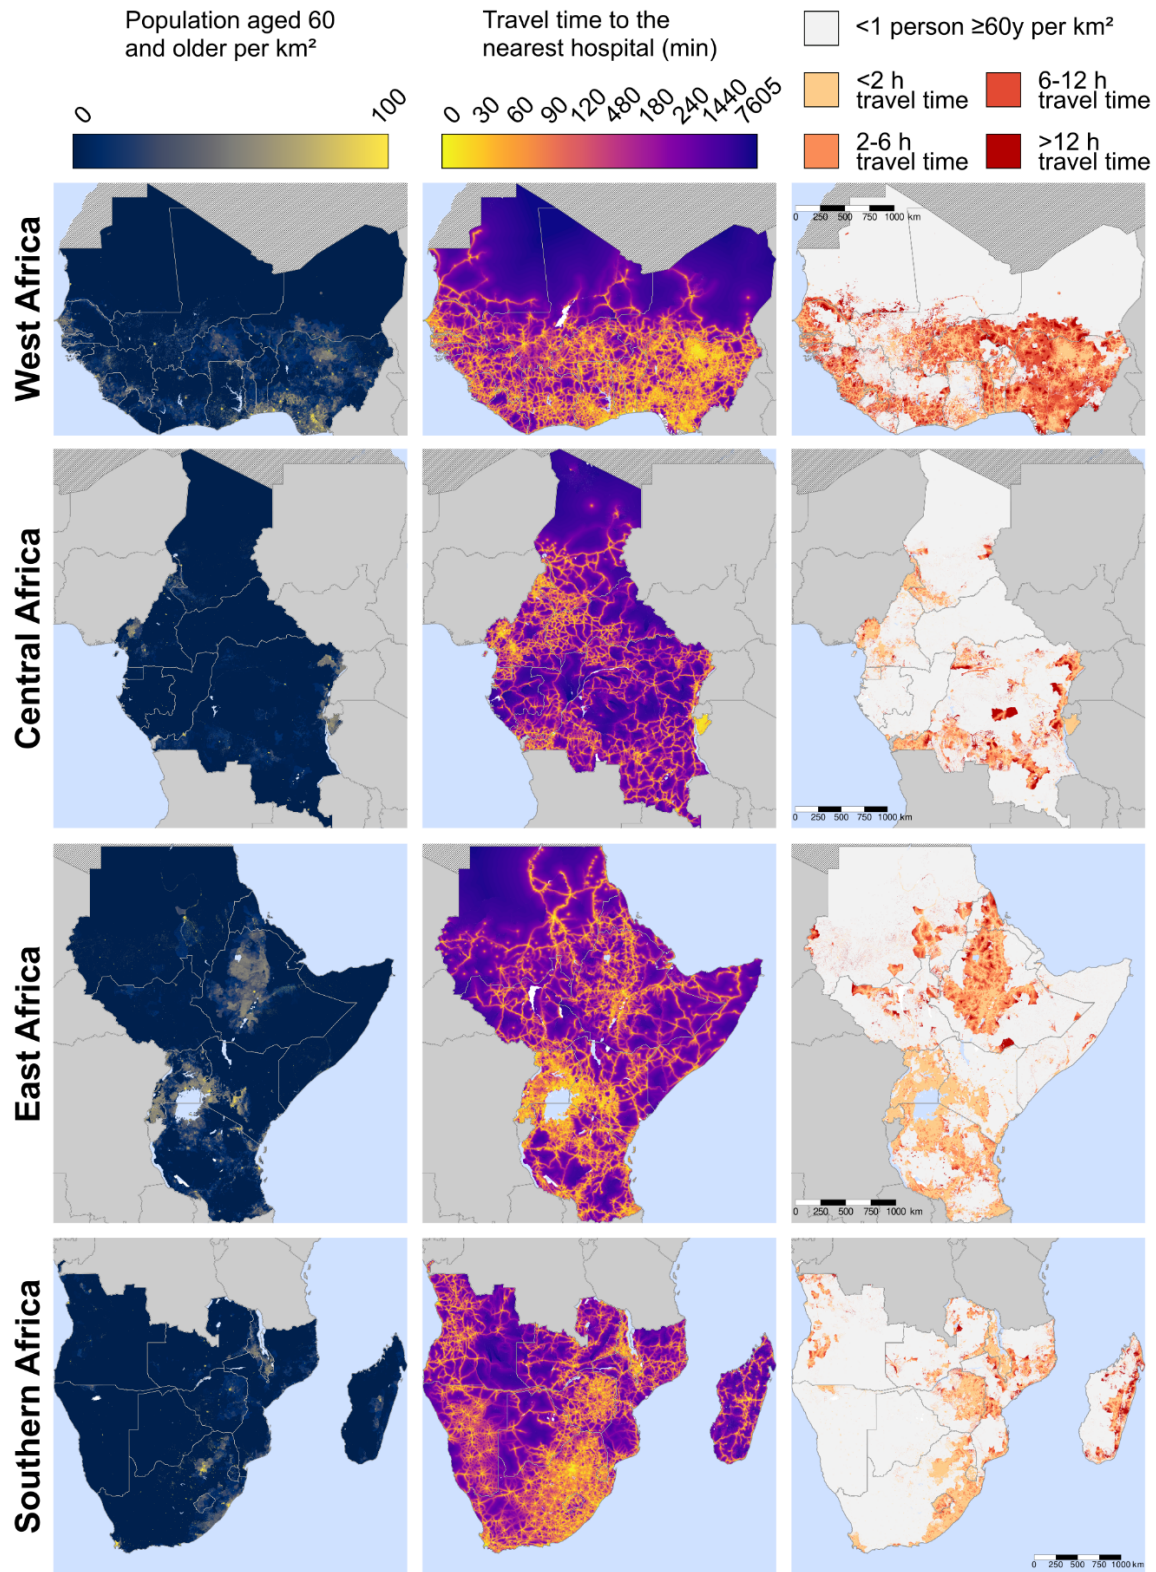

Figure S52. Maps of travel time to the nearest hospital for adults  $\geq 60$  years, by region based on the OSM dataset

**Figure S53. Angola map of travel time to the nearest healthcare facility for adults aged  $\geq 60$  years**

Population

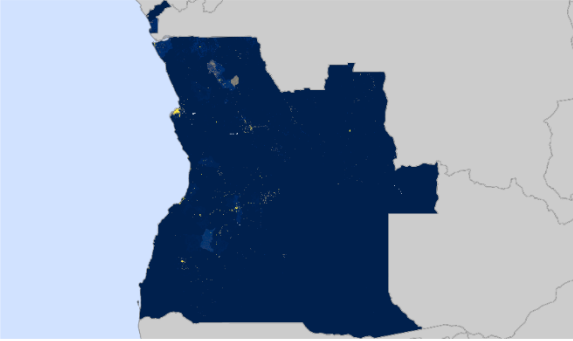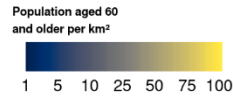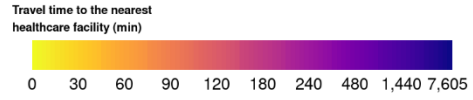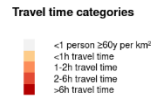

Travel time as continuous variable ( combined data)

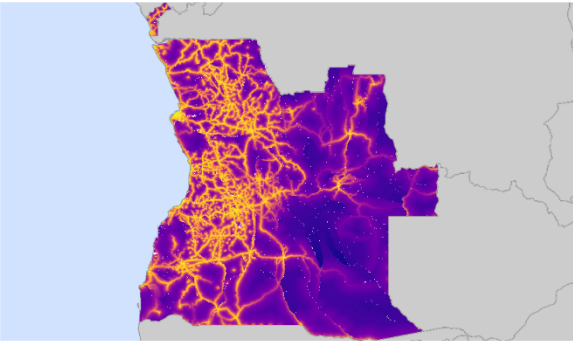

Travel time as categorical variable ( combined data)

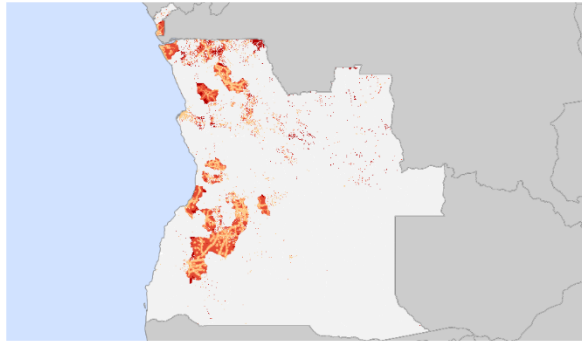

Travel time as continuous variable ( OSM data)

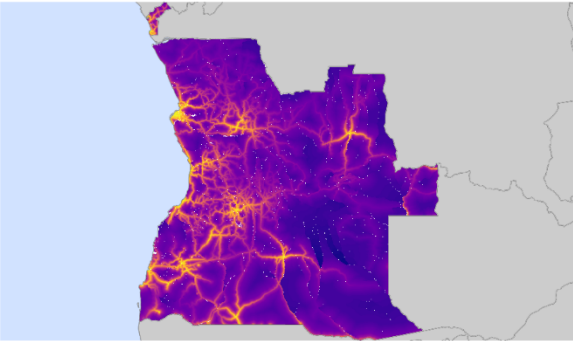

Travel time as categorical variable ( OSM data)

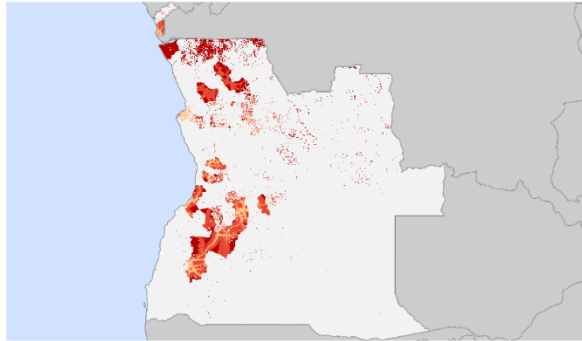

Travel time as continuous variable ( MFL data)

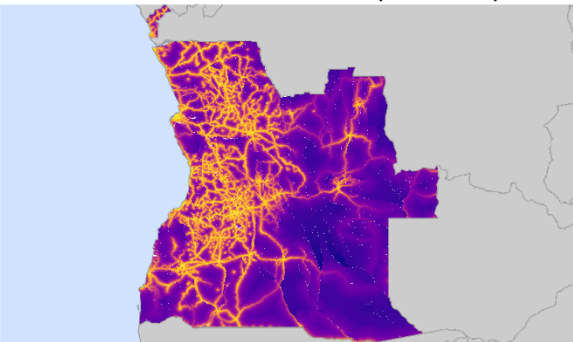

Travel time as categorical variable ( MFL data)

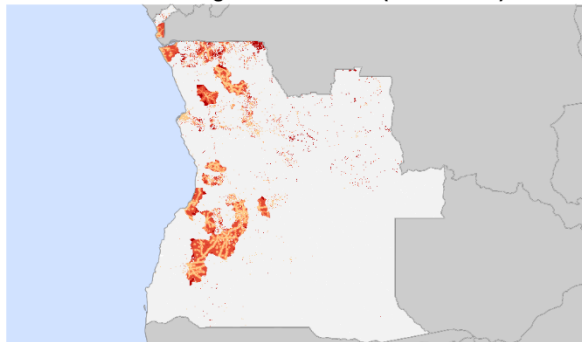

**Figure S54. Benin map of travel time to the nearest healthcare facility for adults aged  $\geq 60$  years**

**Population**

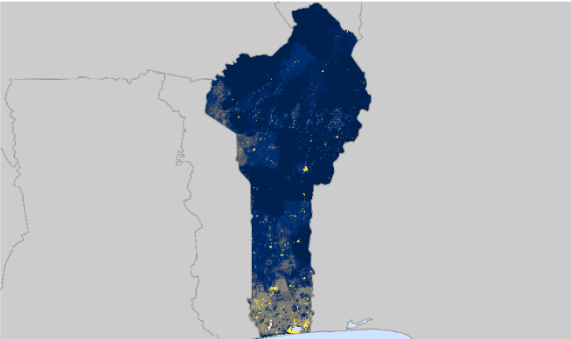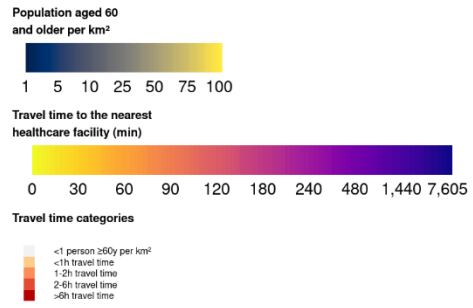

**Travel time as continuous variable ( combined data)**

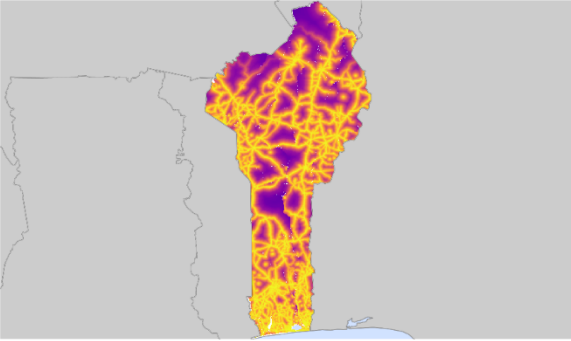

**Travel time as categorical variable ( combined data)**

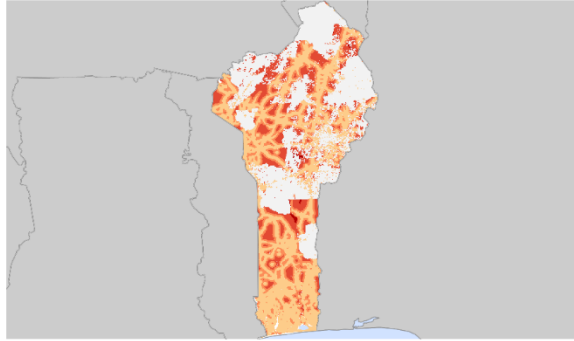

**Travel time as continuous variable ( OSM data)**

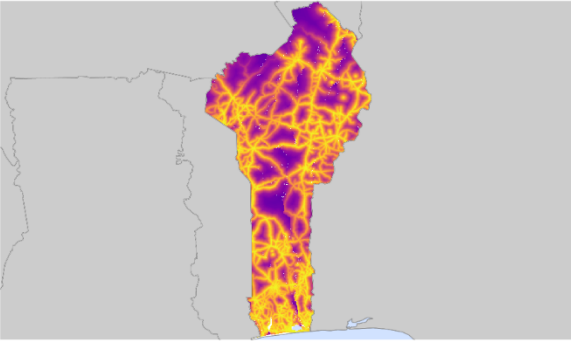

**Travel time as categorical variable ( OSM data)**

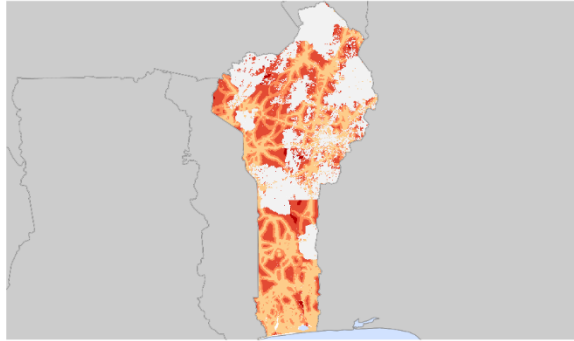

**Travel time as continuous variable ( MFL data)**

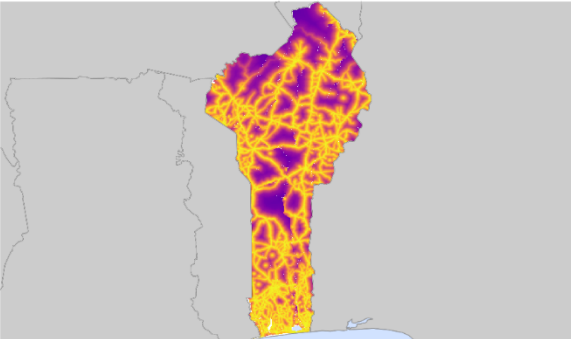

**Travel time as categorical variable ( MFL data)**

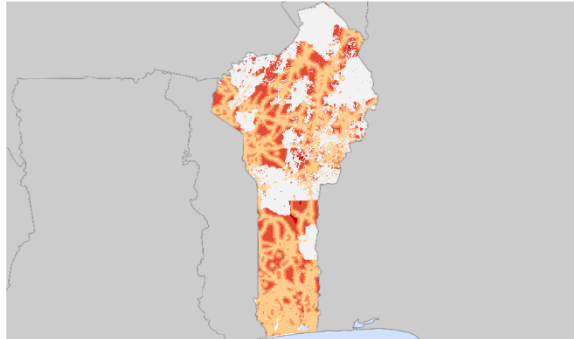

**Figure S55. Botswana map of travel time to the nearest healthcare facility for adults aged  $\geq 60$  years**

**Population**

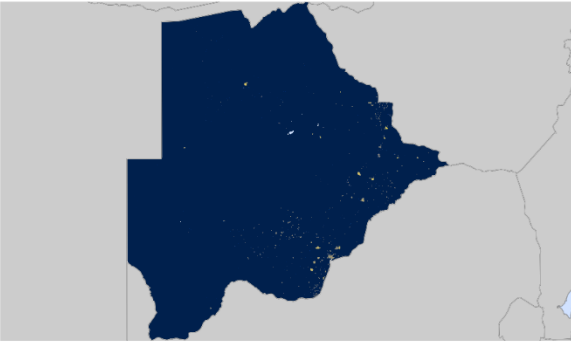

Population aged 60 and older per km<sup>2</sup>

1 5 10 25 50 75 100

Travel time to the nearest healthcare facility (min)

0 30 60 90 120 180 240 480 1,440 7,605

Travel time categories

<1 person ≥60y per km<sup>2</sup>  
 <1h travel time  
 1-2h travel time  
 2-6h travel time  
 >6h travel time

**Travel time as continuous variable ( combined data)**

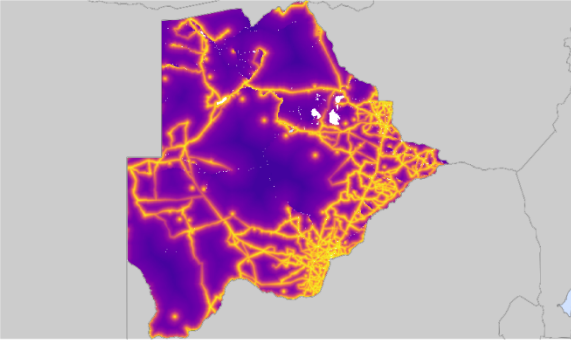

**Travel time as categorical variable ( combined data)**

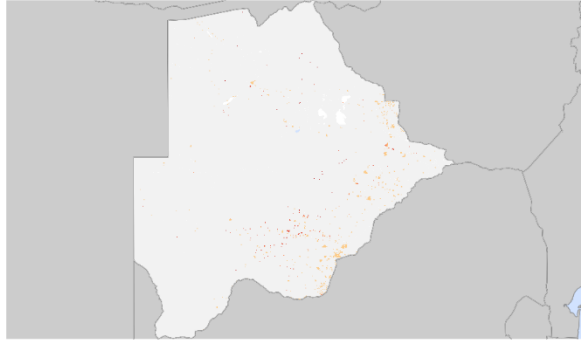

**Travel time as continuous variable ( OSM data)**

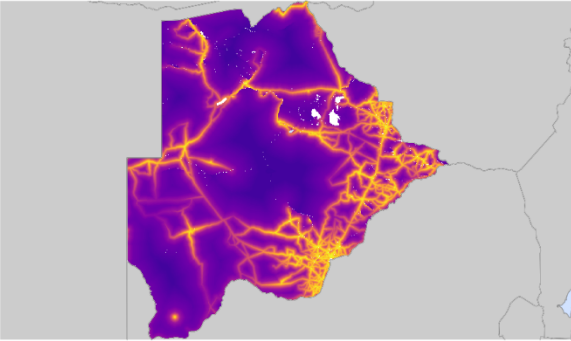

**Travel time as categorical variable ( OSM data)**

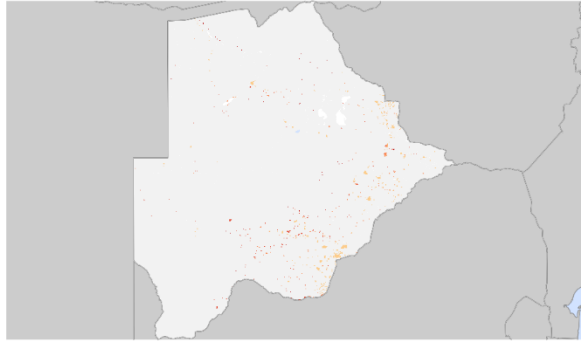

**Travel time as continuous variable ( MFL data)**

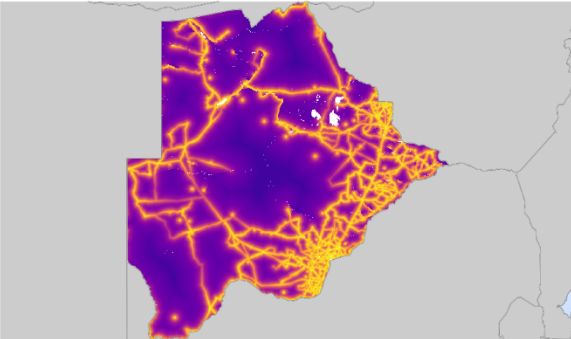

**Travel time as categorical variable ( MFL data)**

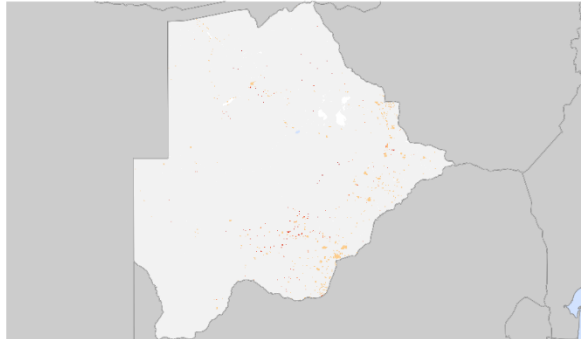



**Figure S56. Burkina Faso map of travel time to the nearest healthcare facility for adults aged  $\geq 60$  years**

**Population**

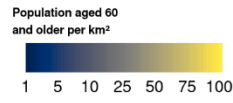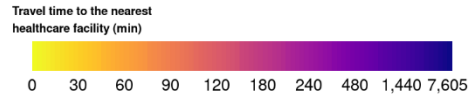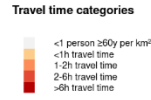

**Travel time as continuous variable ( combined data)**

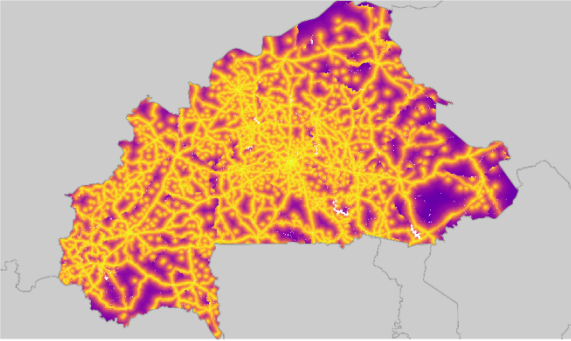

**Travel time as categorical variable ( combined data)**

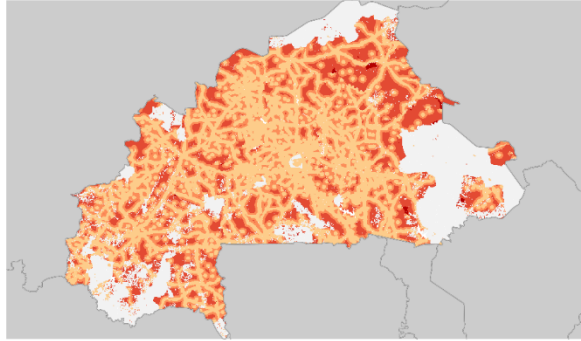

**Travel time as continuous variable ( OSM data)**

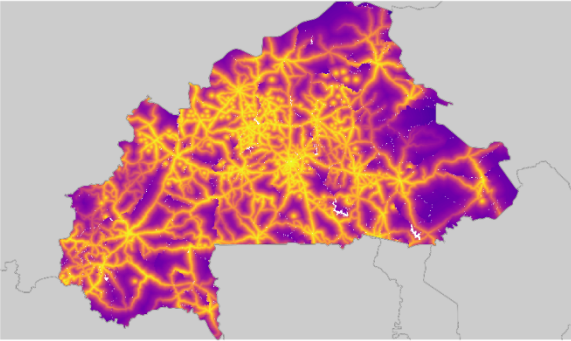

**Travel time as categorical variable ( OSM data)**

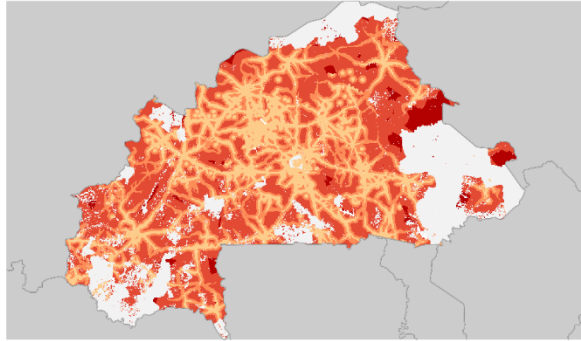

**Travel time as continuous variable ( MFL data)**

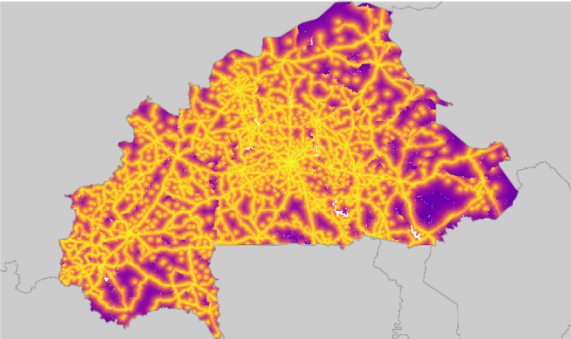

**Travel time as categorical variable ( MFL data)**

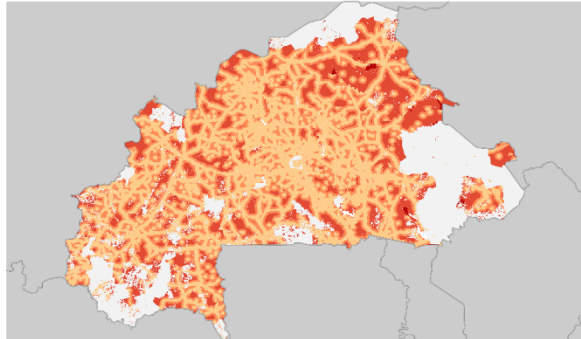

**Figure S57. Burundi map of travel time to the nearest healthcare facility for adults aged  $\geq$  60 years**

**Population**

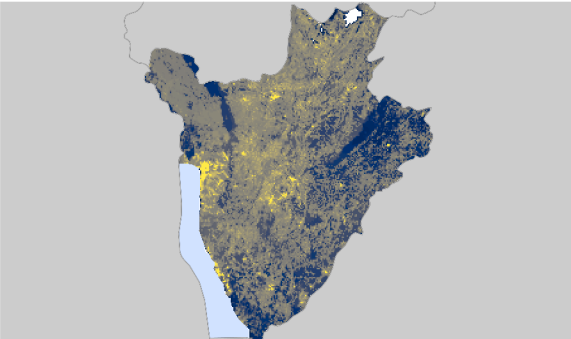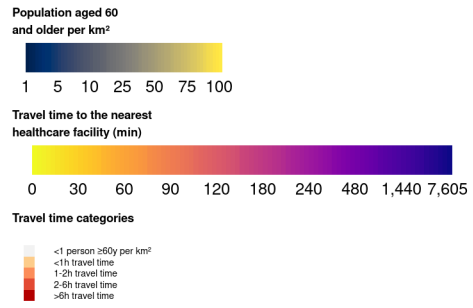

**Travel time as continuous variable ( combined data)**

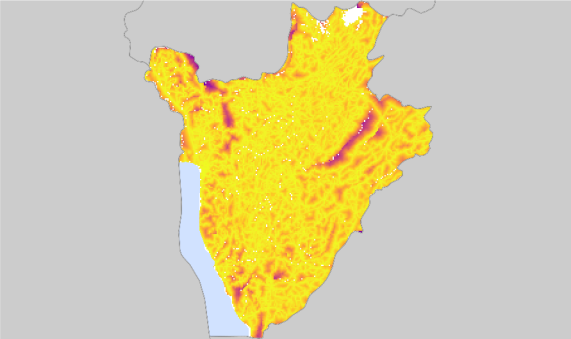

**Travel time as categorical variable ( combined data)**

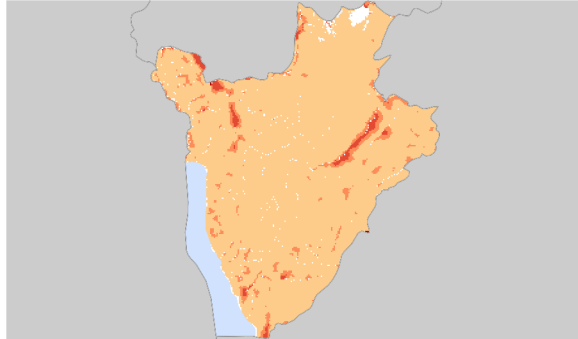

**Travel time as continuous variable ( OSM data)**

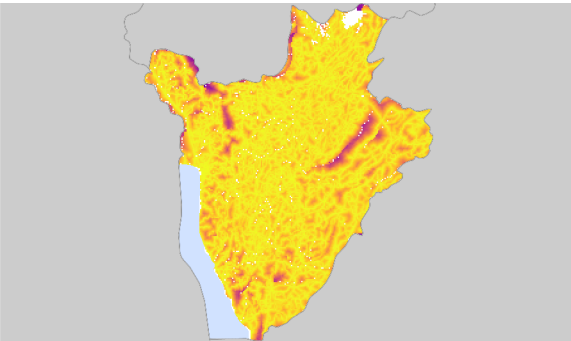

**Travel time as categorical variable ( OSM data)**

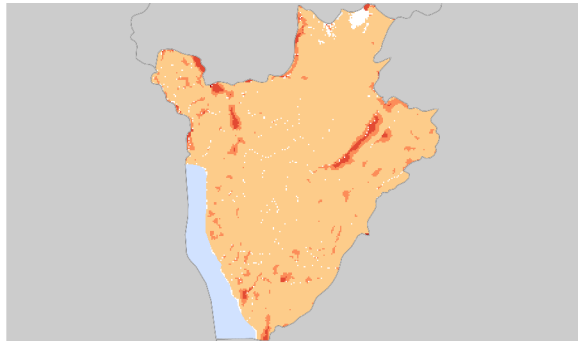

**Travel time as continuous variable ( MFL data)**

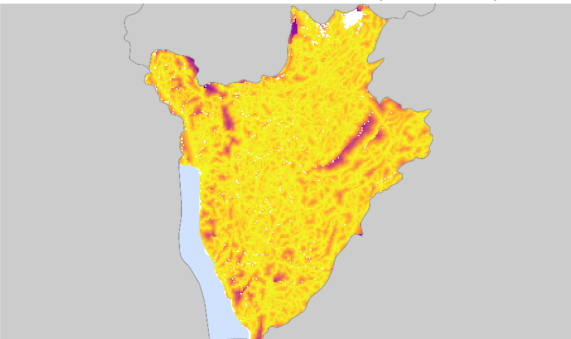

**Travel time as categorical variable ( MFL data)**

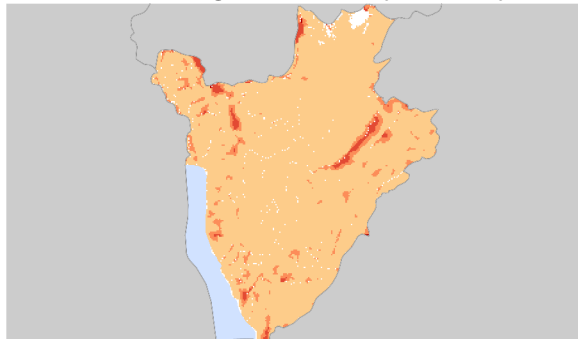

**Figure S58. Cameroon map of travel time to the nearest healthcare facility for adults aged  $\geq 60$  years**

**Population**

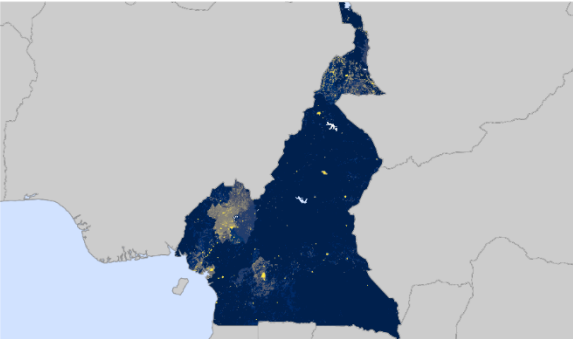

Population aged 60 and older per km<sup>2</sup>

1 5 10 25 50 75 100

Travel time to the nearest healthcare facility (min)

0 30 60 90 120 180 240 480 1,440 7,605

Travel time categories

<1 person ≥60y per km<sup>2</sup>  
 <1h travel time  
 1-2h travel time  
 2-6h travel time  
 >6h travel time

**Travel time as continuous variable ( combined data)**

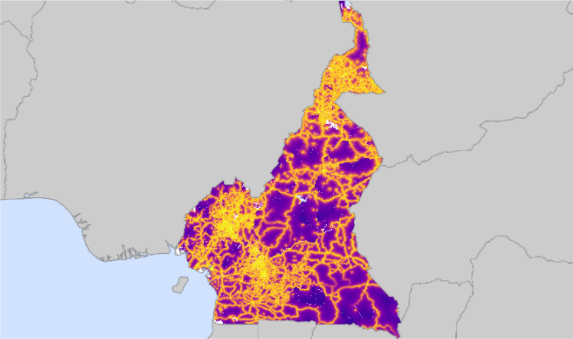

**Travel time as categorical variable ( combined data)**

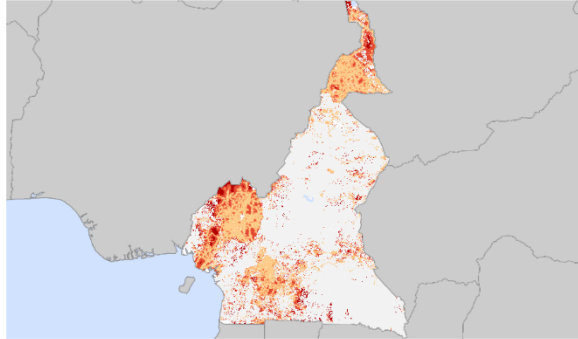

**Travel time as continuous variable ( OSM data)**

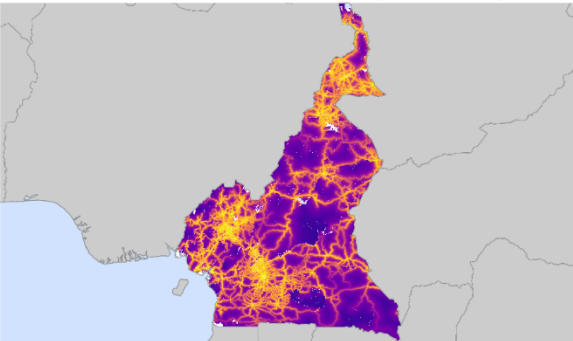

**Travel time as categorical variable ( OSM data)**

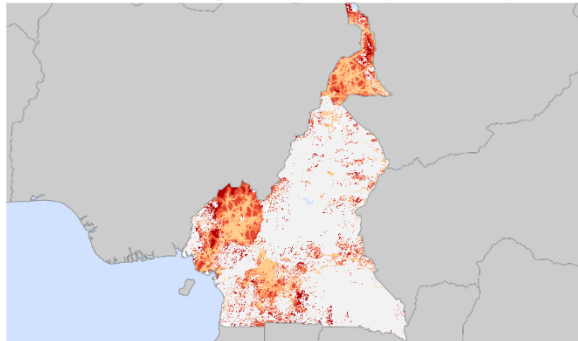

**Travel time as continuous variable ( MFL data)**

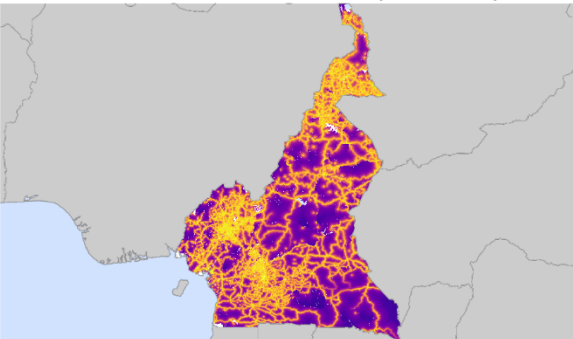

**Travel time as categorical variable ( MFL data)**

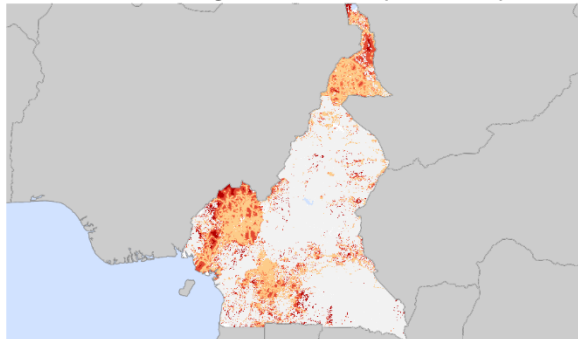

**Figure S59. Central African Republic map of travel time to the nearest healthcare facility for adults aged  $\geq 60$  years**

**Population**

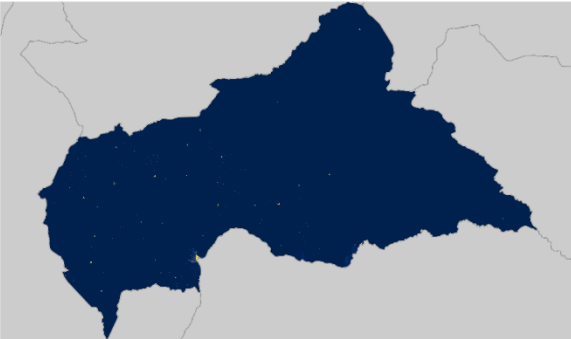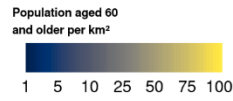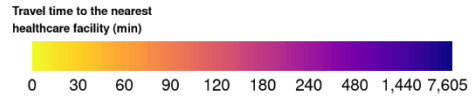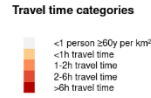

**Travel time as continuous variable ( combined data)**

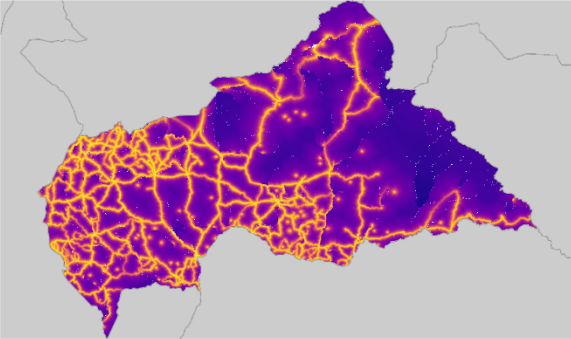

**Travel time as categorical variable ( combined data)**

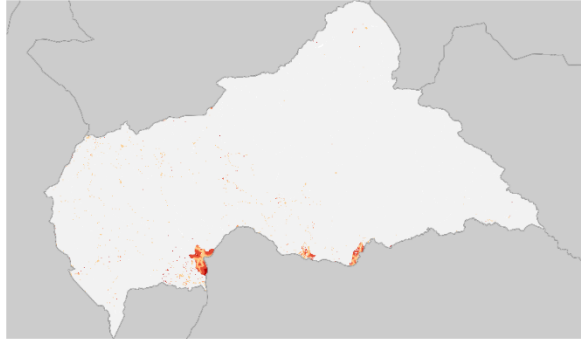

**Travel time as continuous variable ( OSM data)**

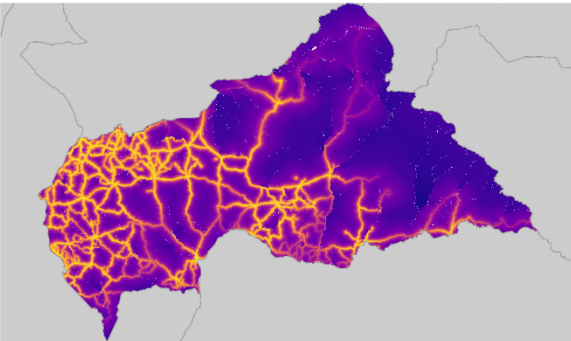

**Travel time as categorical variable ( OSM data)**

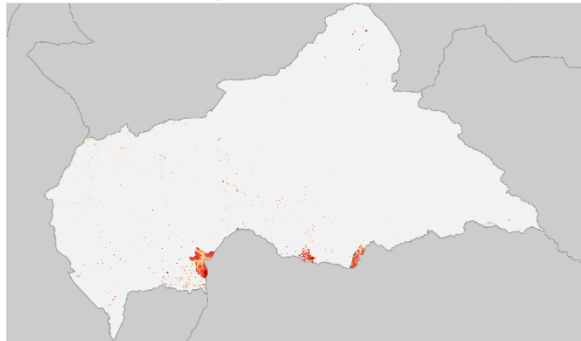

**Travel time as continuous variable ( MFL data)**

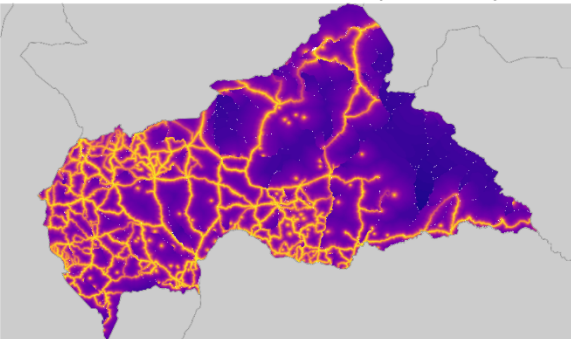

**Travel time as categorical variable ( MFL data)**

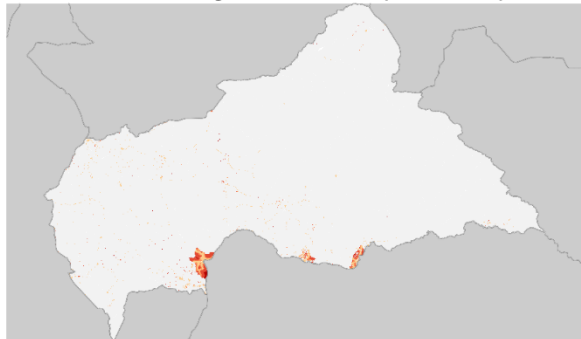

**Figure S60. Chad map of travel time to the nearest healthcare facility for adults aged  $\geq 60$  years**

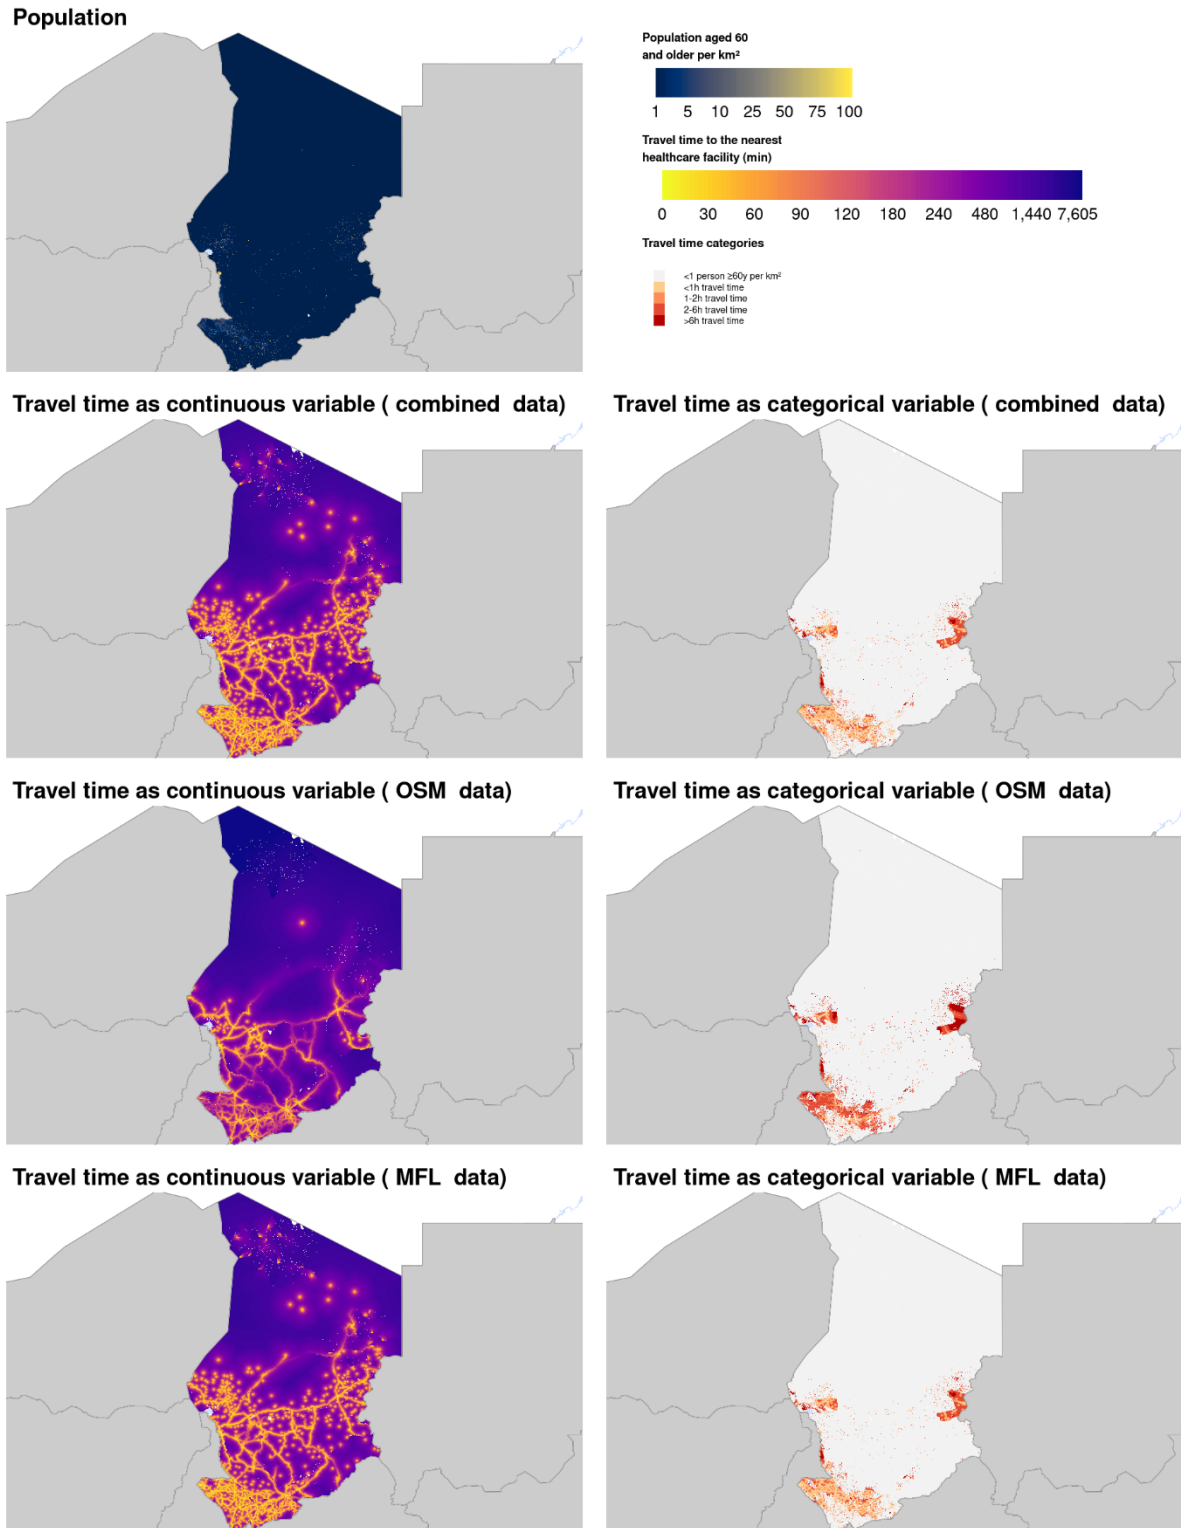

**Figure S61. Djibouti map of travel time to the nearest healthcare facility for adults aged  $\geq 60$  years**

**Population**

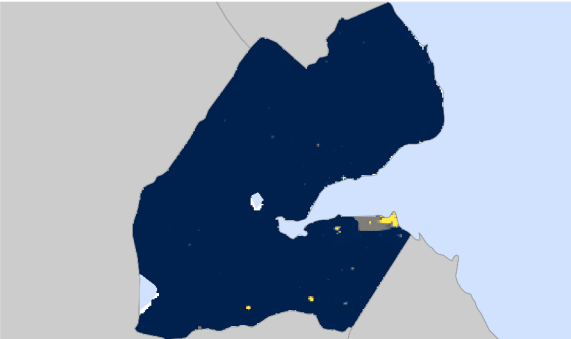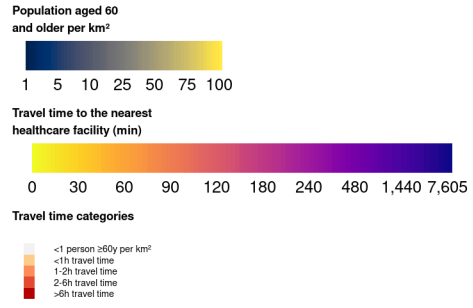

**Travel time as continuous variable ( combined data)**

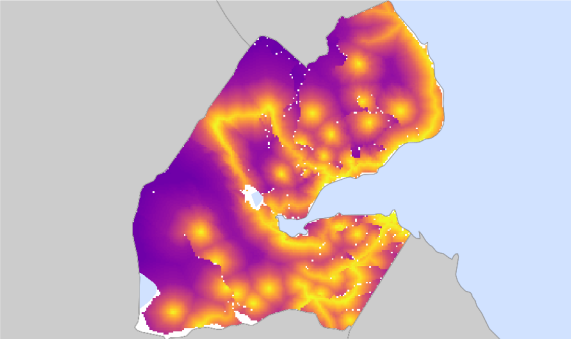

**Travel time as categorical variable ( combined data)**

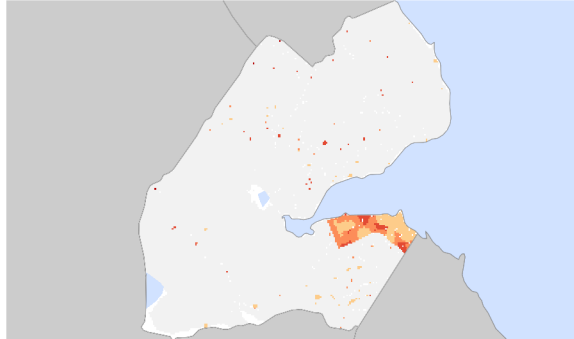

**Travel time as continuous variable ( OSM data)**

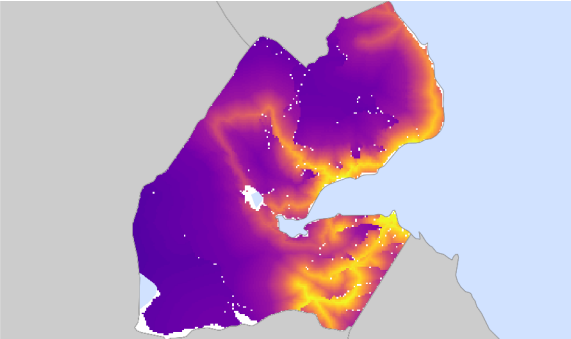

**Travel time as categorical variable ( OSM data)**

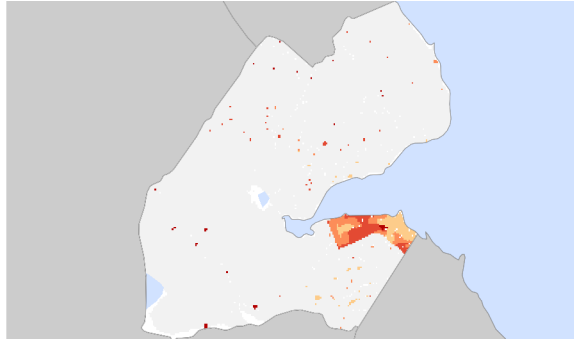

**Travel time as continuous variable ( MFL data)**

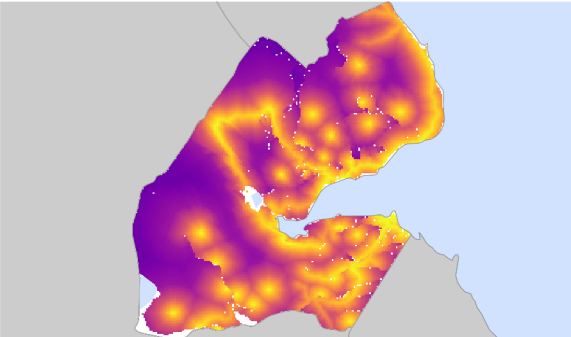

**Travel time as categorical variable ( MFL data)**

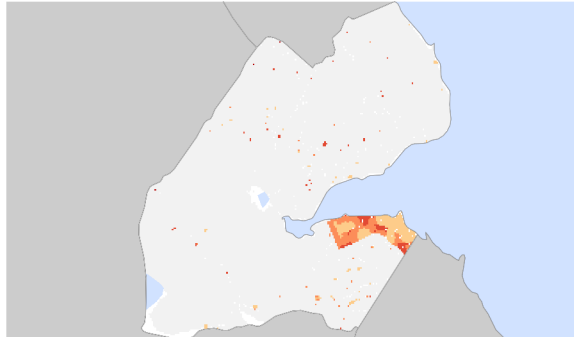

**Figure S62. DRC map of travel time to the nearest healthcare facility for adults aged  $\geq 60$  years**

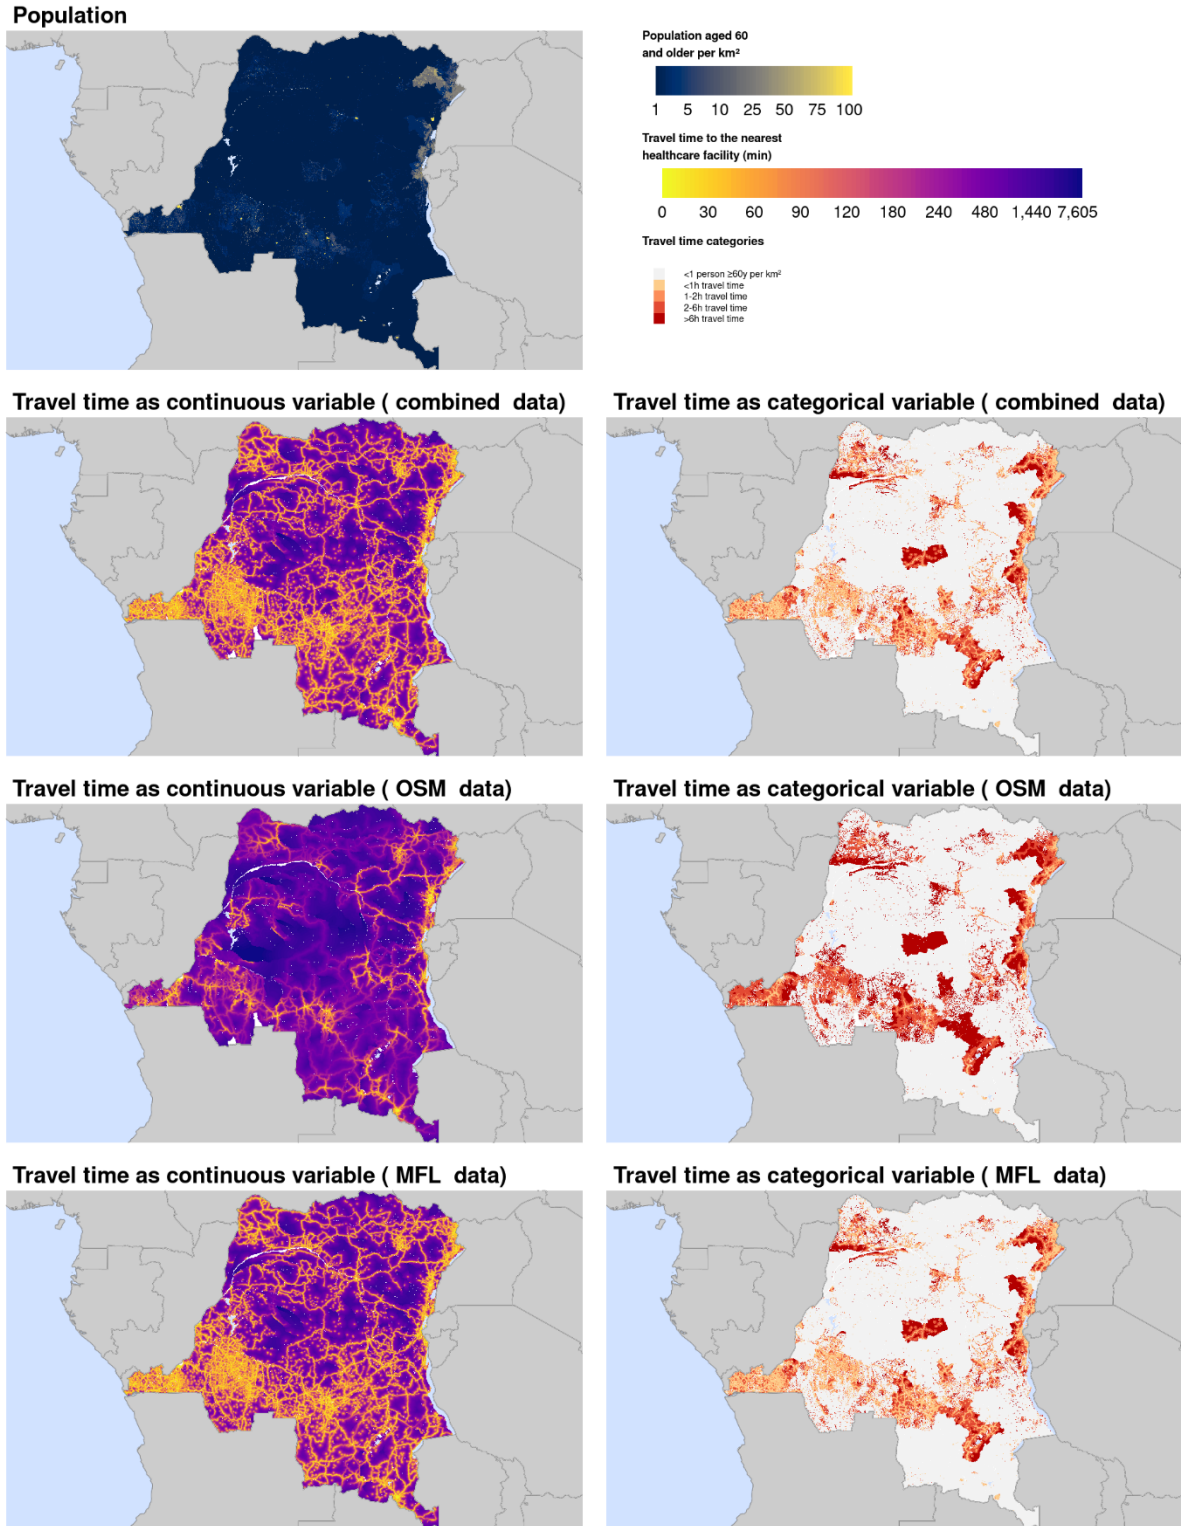

**Figure S63. Equatorial Guinea map of travel time to the nearest healthcare facility for adults aged  $\geq 60$  years**

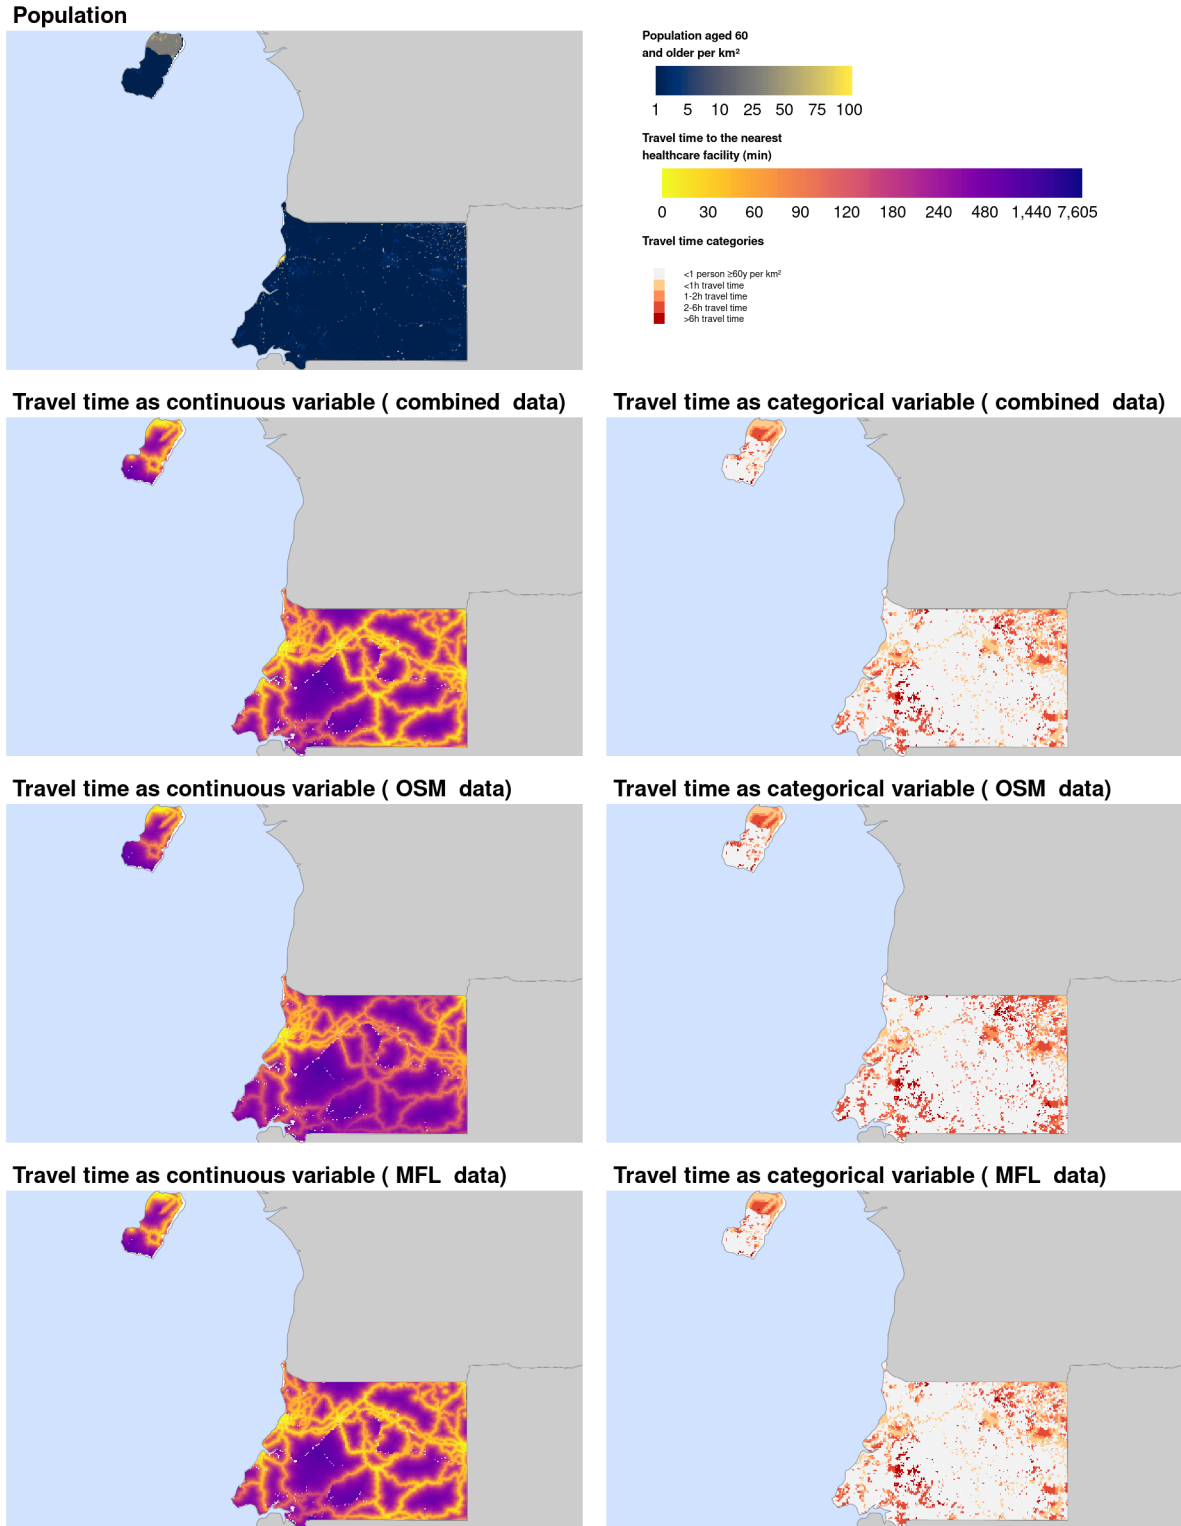



**Figure S64. Eritrea map of travel time to the nearest healthcare facility for adults aged  $\geq 60$  years**

**Population**

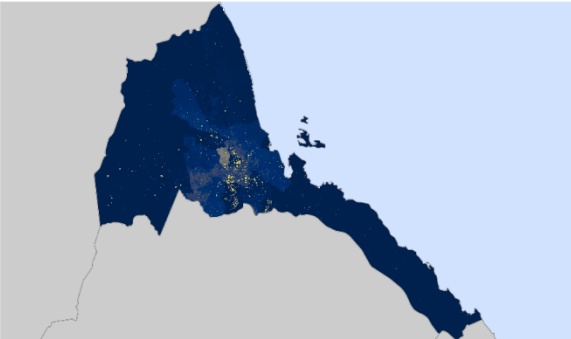

Population aged 60 and older per km<sup>2</sup>

1 5 10 25 50 75 100

Travel time to the nearest healthcare facility (min)

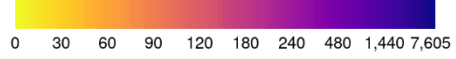

Travel time categories

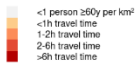

**Travel time as continuous variable ( combined data)**

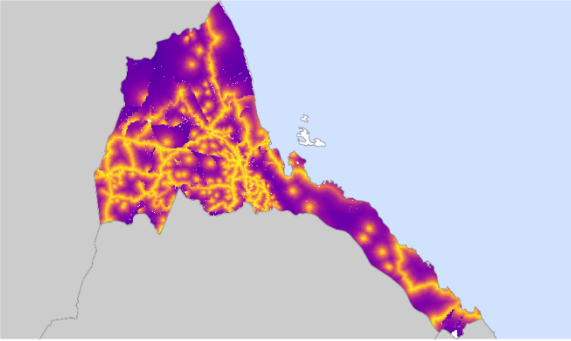

**Travel time as categorical variable ( combined data)**

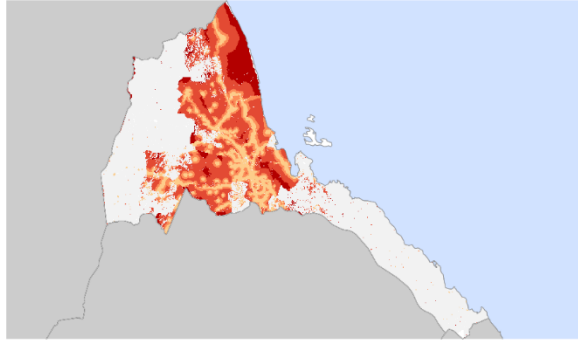

**Travel time as continuous variable ( OSM data)**

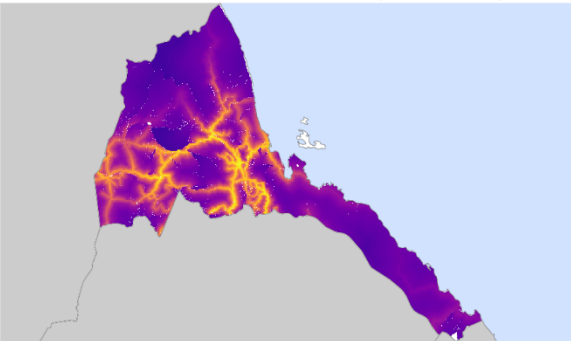

**Travel time as categorical variable ( OSM data)**

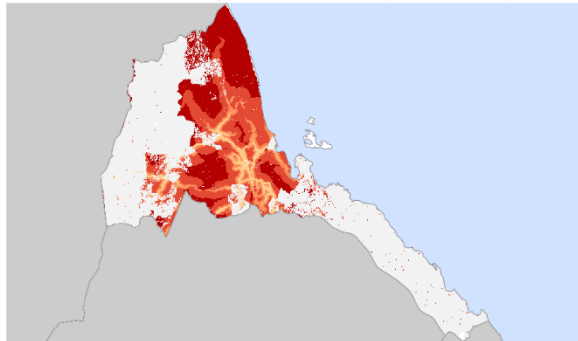

**Travel time as continuous variable ( MFL data)**

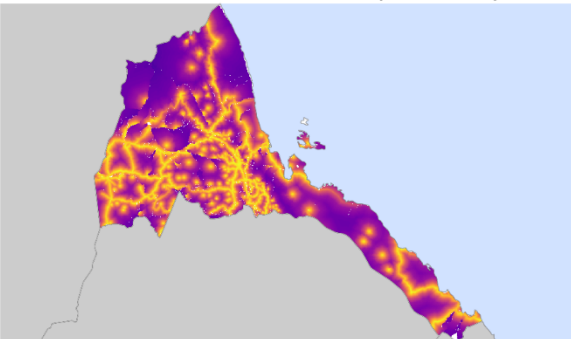

**Travel time as categorical variable ( MFL data)**

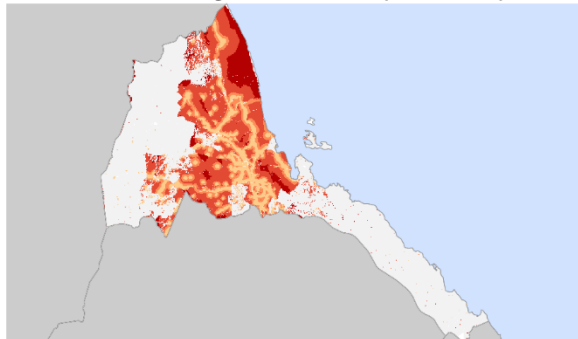

**Figure S65. eSwatini map of travel time to the nearest healthcare facility for adults aged  $\geq 60$  years**

**Population**

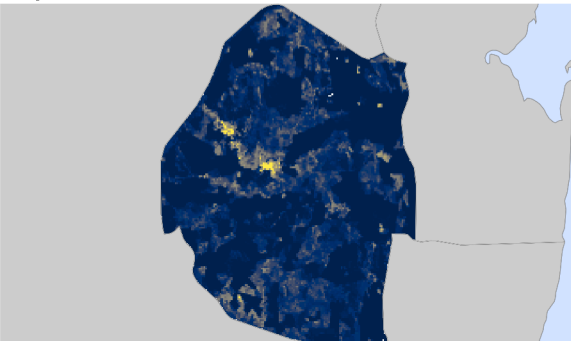

**Travel time as continuous variable ( combined data)**

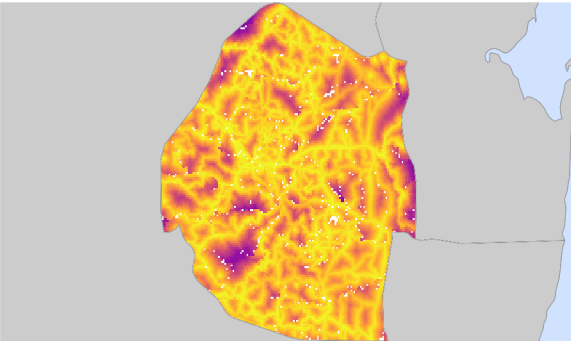

**Travel time as categorical variable ( combined data)**

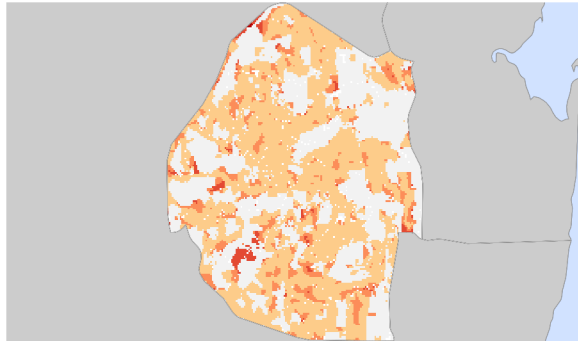

**Travel time as continuous variable ( OSM data)**

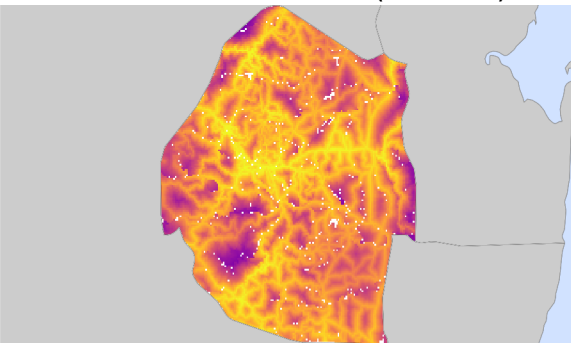

**Travel time as categorical variable ( OSM data)**

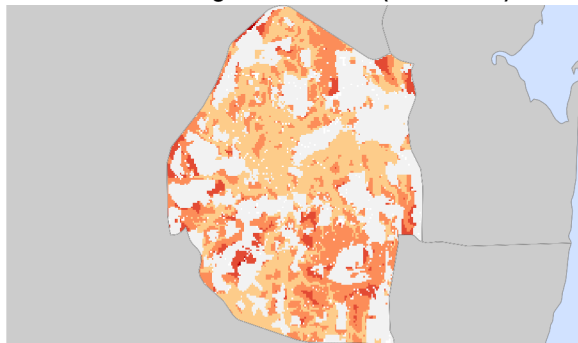

**Travel time as continuous variable ( MFL data)**

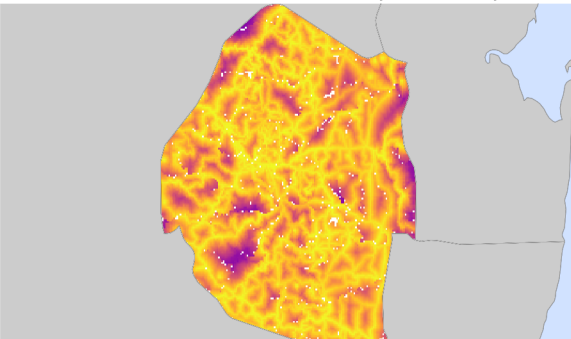

**Travel time as categorical variable ( MFL data)**

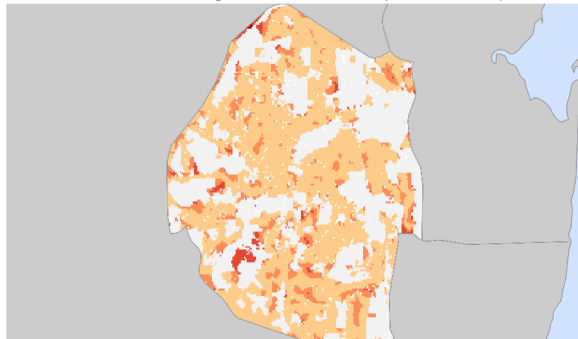

**Figure S66. Ethiopia map of travel time to the nearest healthcare facility for adults aged  $\geq 60$  years**

**Population**

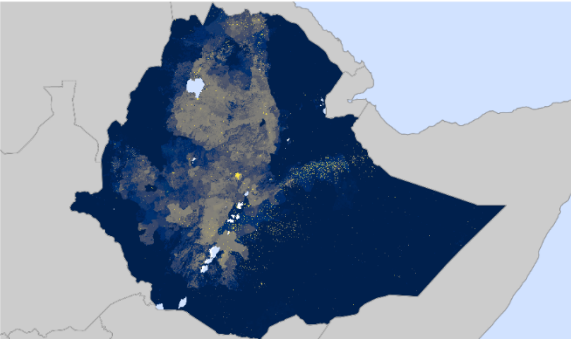

Population aged 60 and older per km<sup>2</sup>

1 5 10 25 50 75 100

Travel time to the nearest healthcare facility (min)

0 30 60 90 120 180 240 480 1,440 7,605

Travel time categories

<1 person ≥60y per km<sup>2</sup>  
 <1h travel time  
 1-2h travel time  
 2-6h travel time  
 >6h travel time

**Travel time as continuous variable ( combined data)**

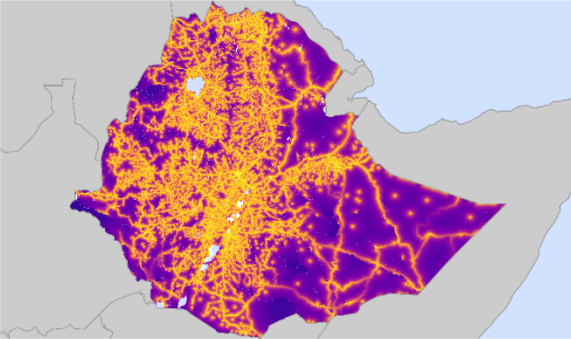

**Travel time as categorical variable ( combined data)**

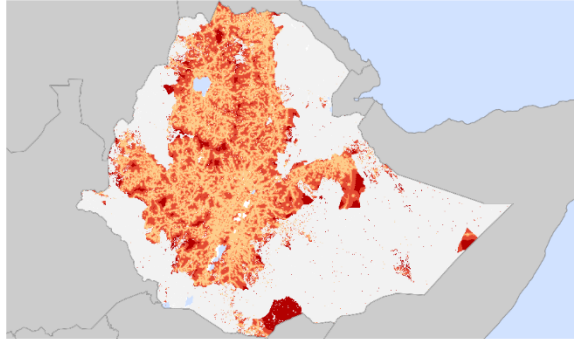

**Travel time as continuous variable ( OSM data)**

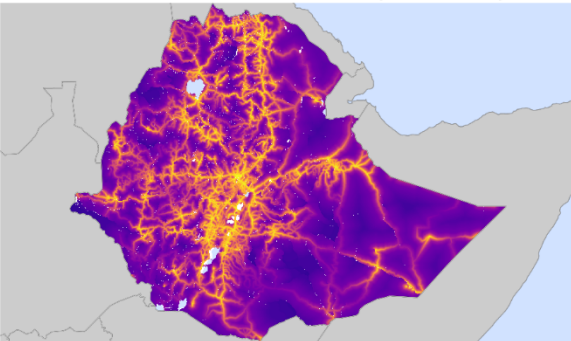

**Travel time as categorical variable ( OSM data)**

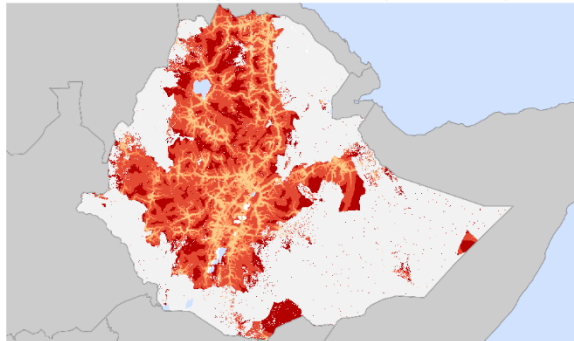

**Travel time as continuous variable ( MFL data)**

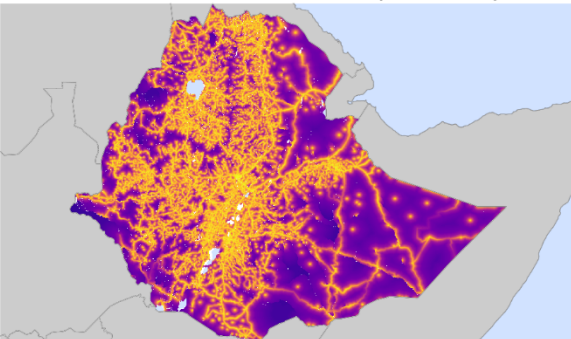

**Travel time as categorical variable ( MFL data)**

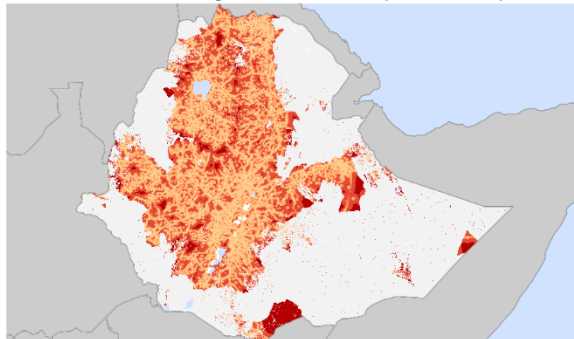

**Figure S67. Gabon map of travel time to the nearest healthcare facility for adults aged  $\geq 60$  years**

**Population**

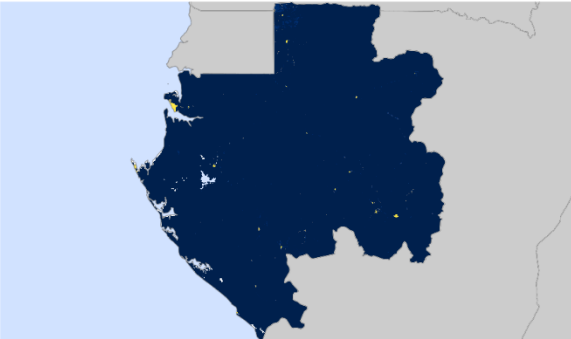

**Travel time as continuous variable ( combined data)**

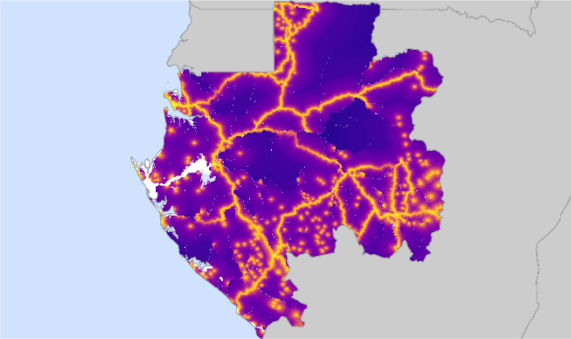

**Travel time as categorical variable ( combined data)**

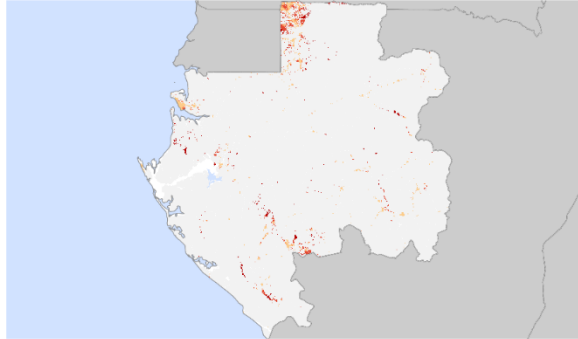

**Travel time as continuous variable ( OSM data)**

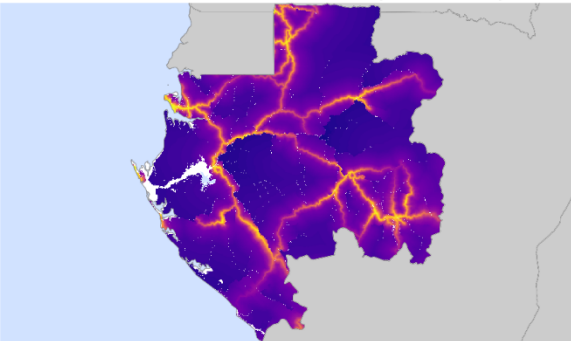

**Travel time as categorical variable ( OSM data)**

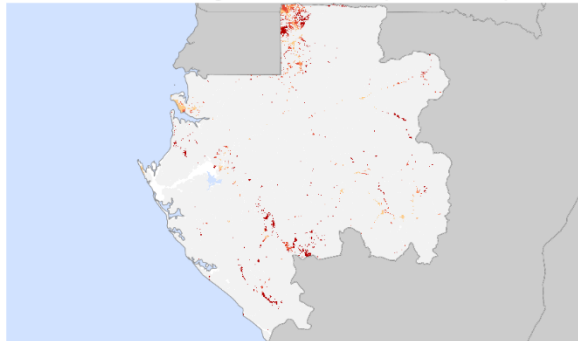

**Travel time as continuous variable ( MFL data)**

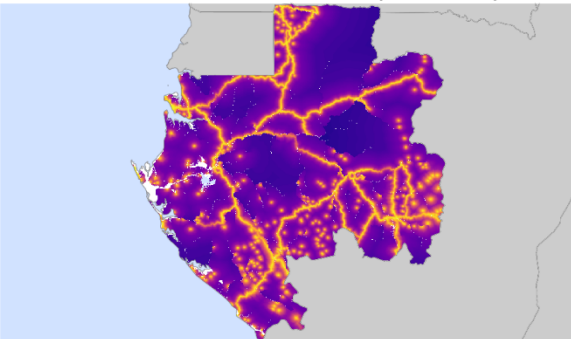

**Travel time as categorical variable ( MFL data)**

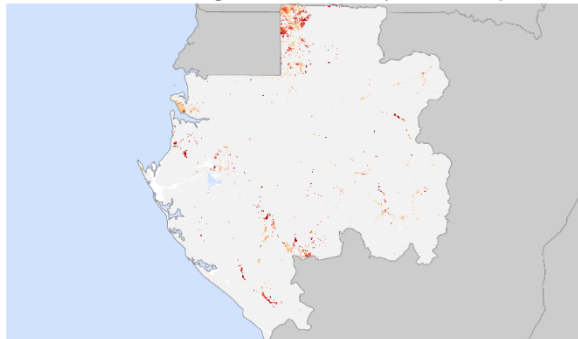

**Figure S68. Ghana map of travel time to the nearest healthcare facility for adults aged  $\geq 60$  years**

**Population**

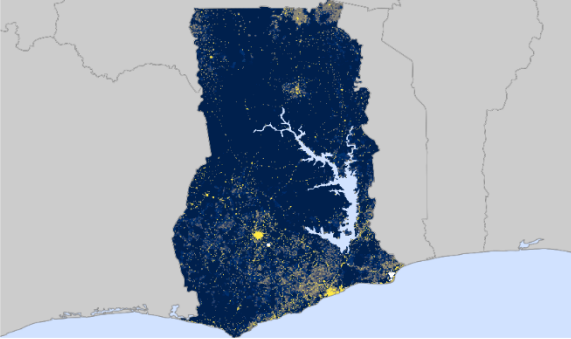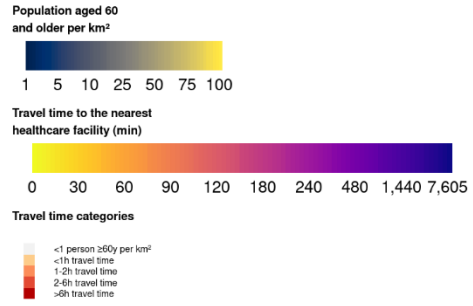

**Travel time as continuous variable ( combined data)**

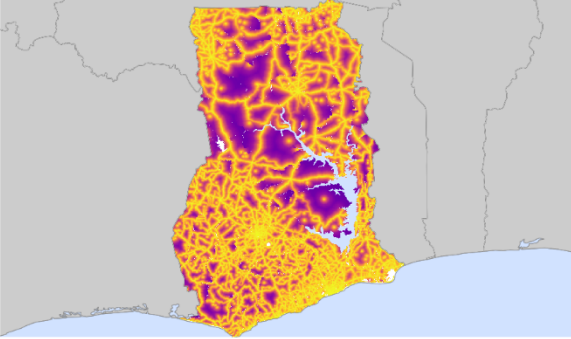

**Travel time as categorical variable ( combined data)**

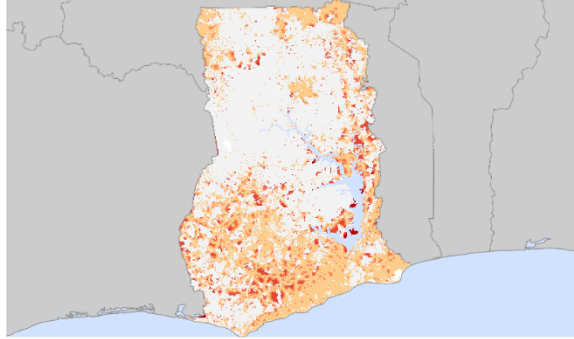

**Travel time as continuous variable ( OSM data)**

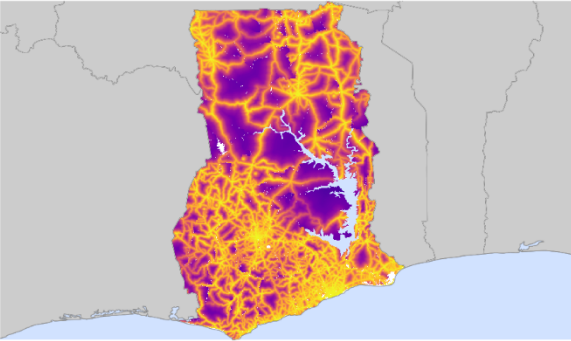

**Travel time as categorical variable ( OSM data)**

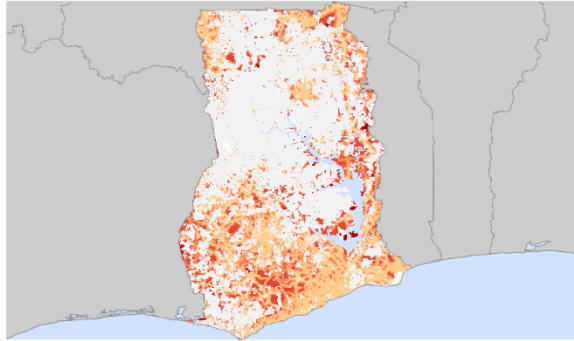

**Travel time as continuous variable ( MFL data)**

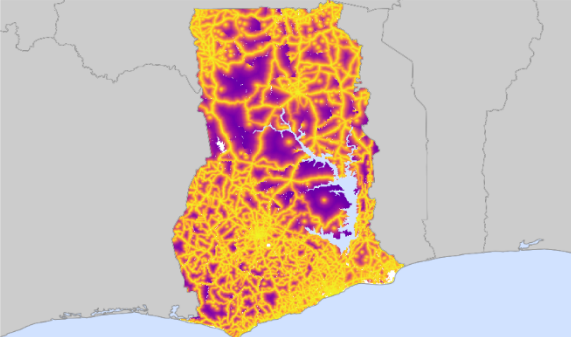

**Travel time as categorical variable ( MFL data)**

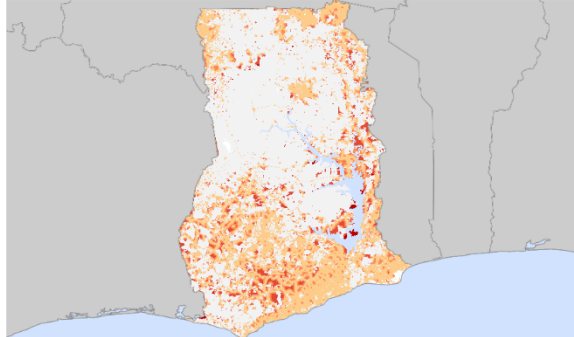

**Figure S69. Guinea map of travel time to the nearest healthcare facility for adults aged  $\geq 60$  years**

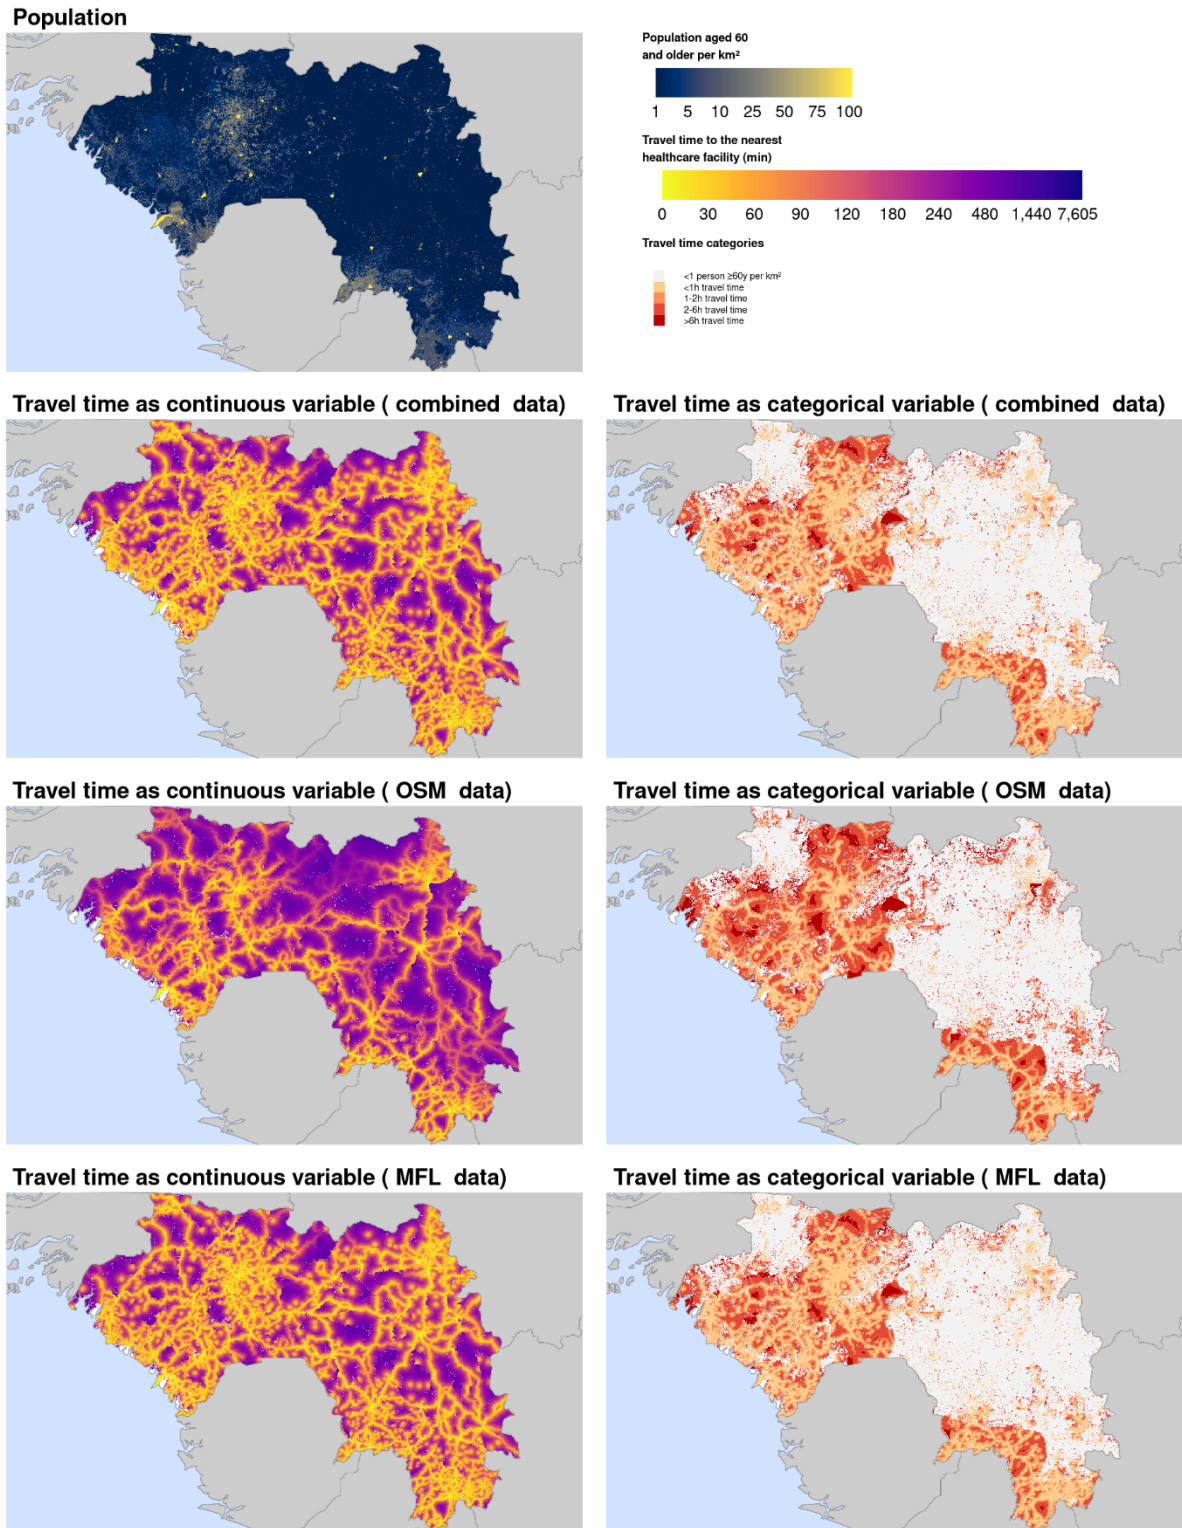

**Figure S70. Guinea-Bissau map of travel time to the nearest healthcare facility for adults aged  $\geq 60$  years**

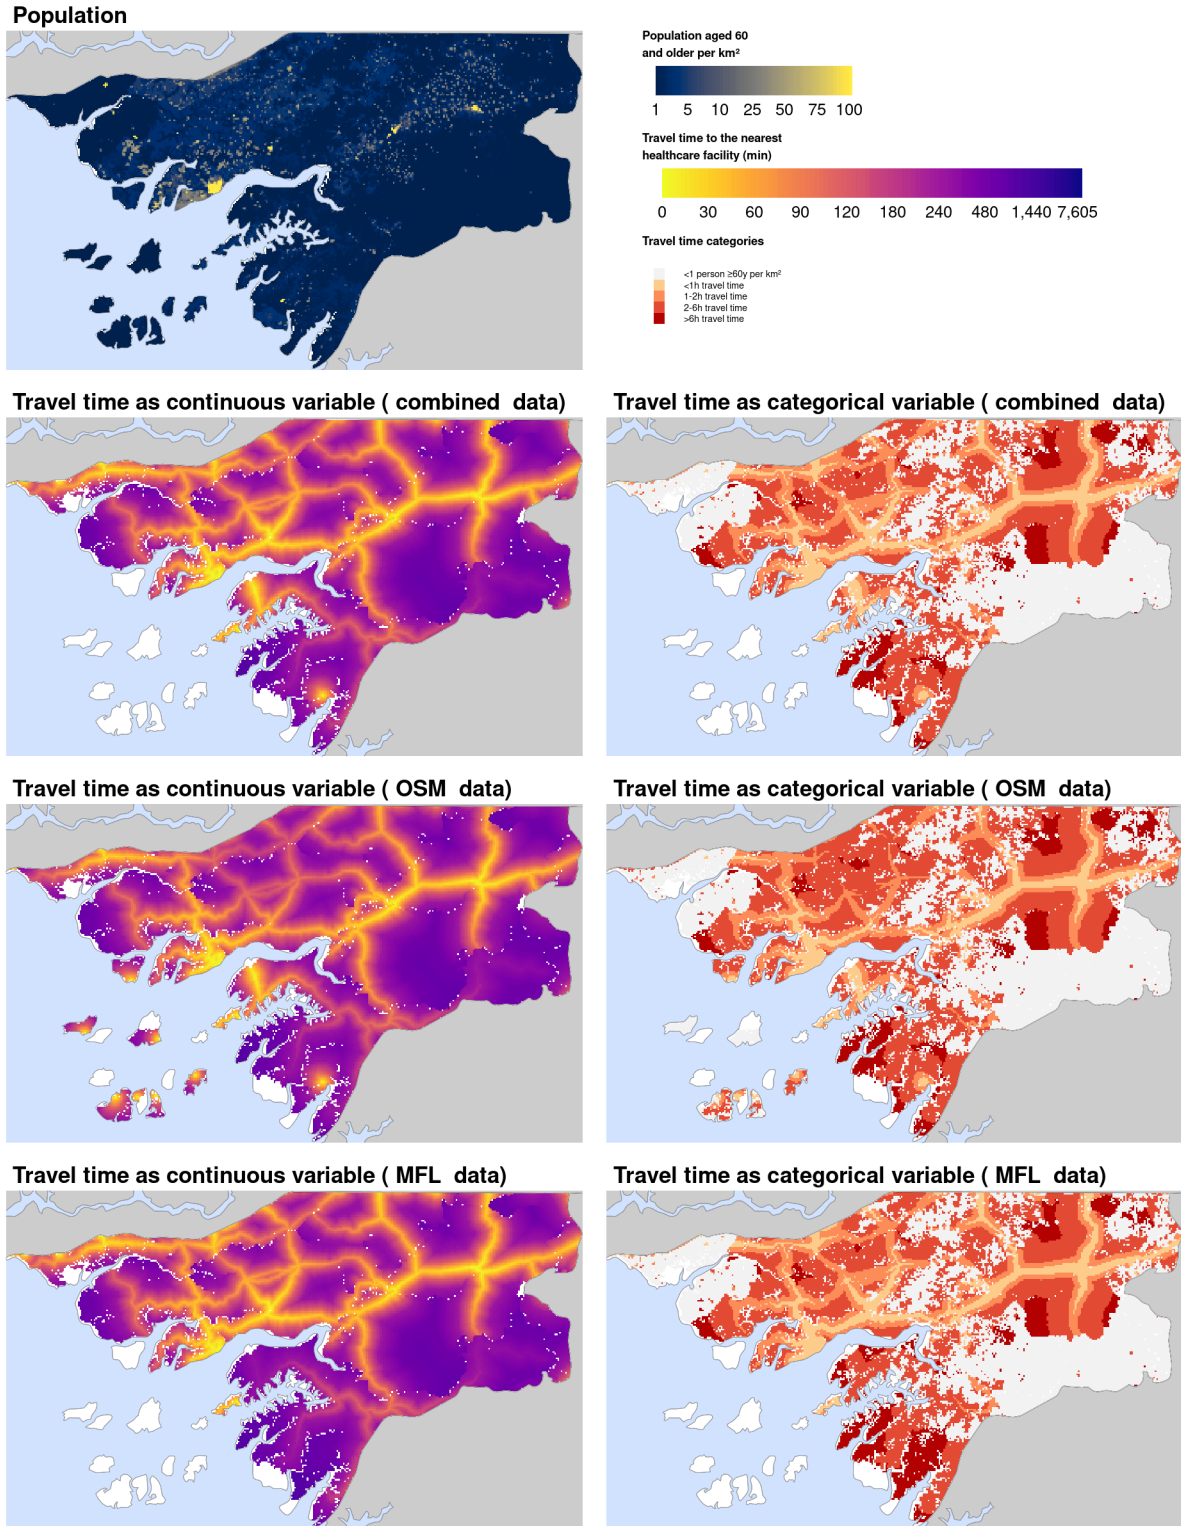

**Figure S71. Ivory Coast map of travel time to the nearest healthcare facility for adults aged  $\geq 60$  years**

**Population**

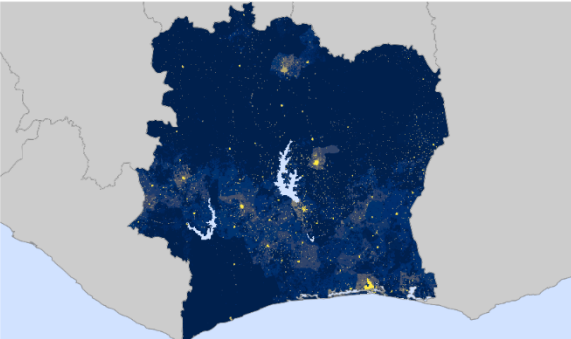

**Population aged 60 and older per km<sup>2</sup>**

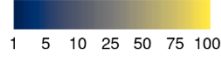

**Travel time to the nearest healthcare facility (min)**

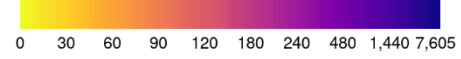

**Travel time categories**

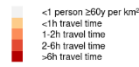

**Travel time as continuous variable ( combined data)**

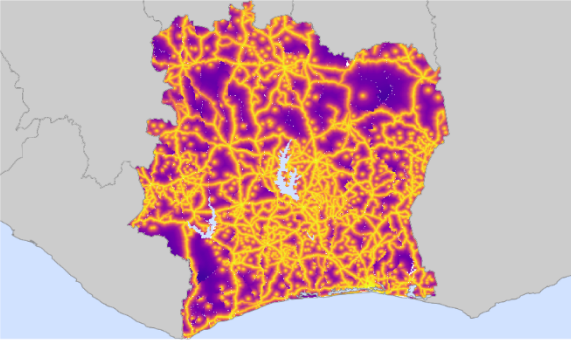

**Travel time as categorical variable ( combined data)**

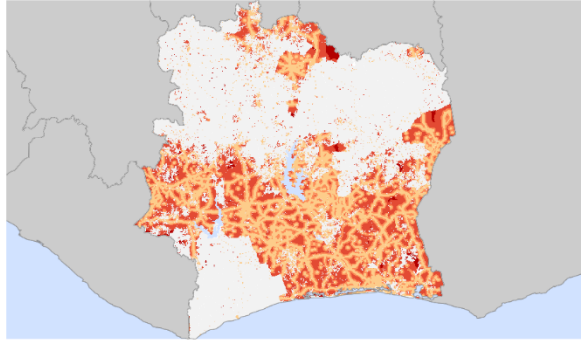

**Travel time as continuous variable ( OSM data)**

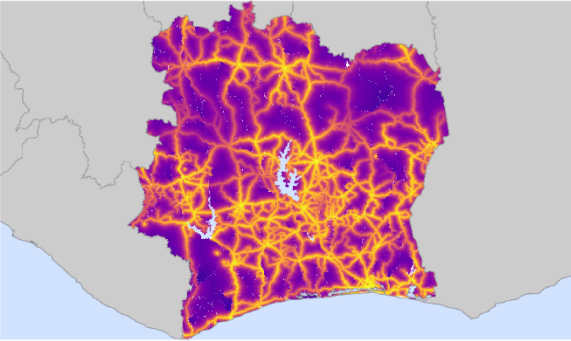

**Travel time as categorical variable ( OSM data)**

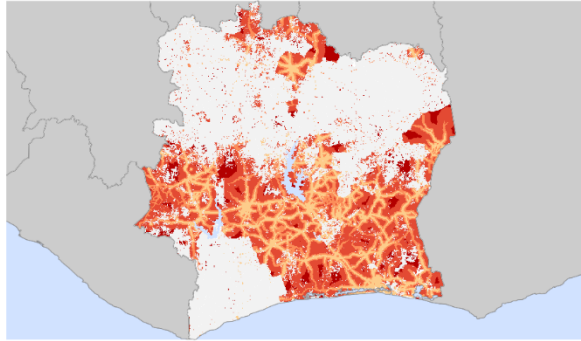

**Travel time as continuous variable ( MFL data)**

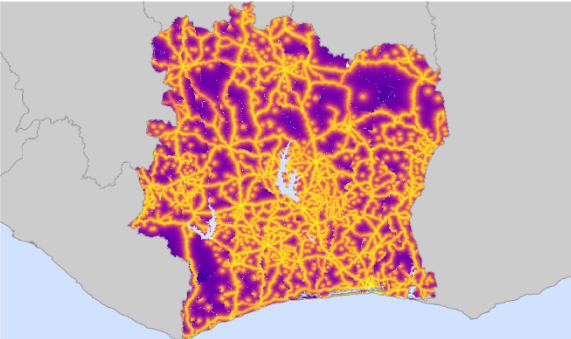

**Travel time as categorical variable ( MFL data)**

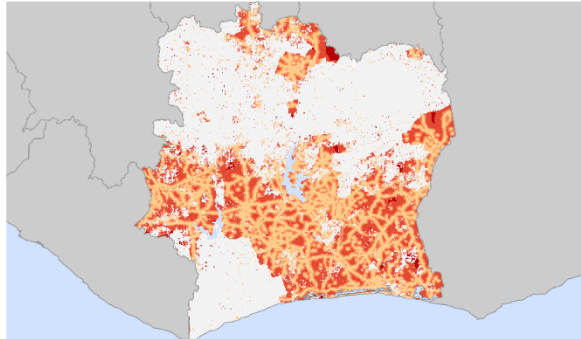



**Figure S72. Kenya map of travel time to the nearest healthcare facility for adults aged  $\geq 60$  years**

**Population**

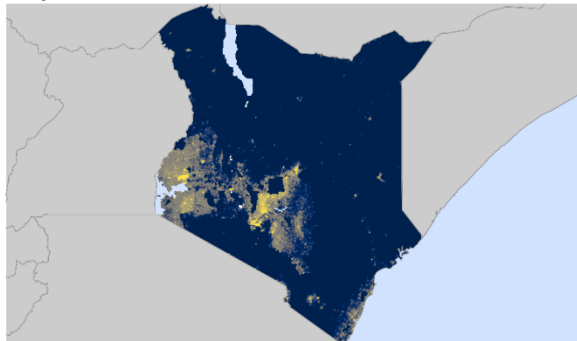

Population aged 60 and older per km<sup>2</sup>

1 5 10 25 50 75 100

Travel time to the nearest healthcare facility (min)

0 30 60 90 120 180 240 480 1,440 7,605

Travel time categories

- <1 person ≥60y per km<sup>2</sup>
- <1h travel time
- 1-2h travel time
- 2-6h travel time
- >6h travel time

**Travel time as continuous variable ( combined data)**

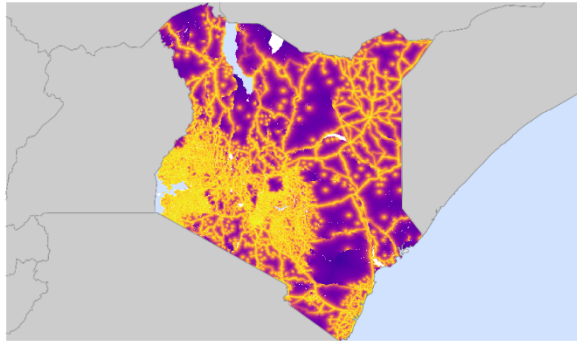

**Travel time as categorical variable ( combined data)**

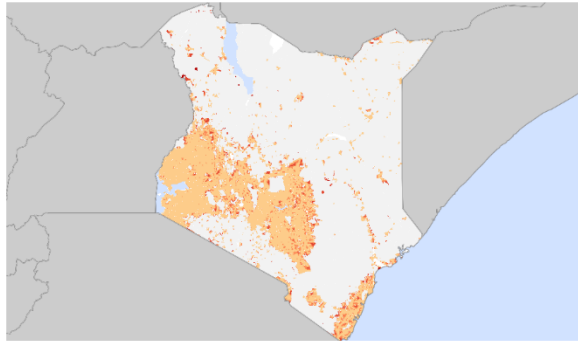

**Travel time as continuous variable ( OSM data)**

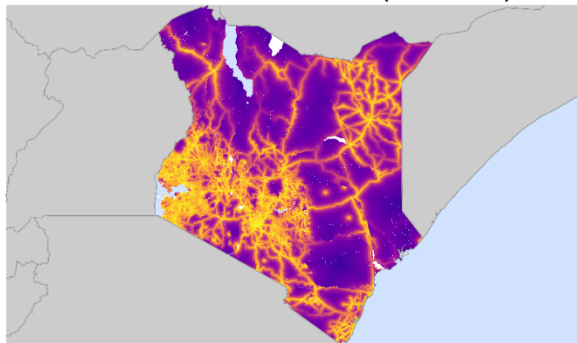

**Travel time as categorical variable ( OSM data)**

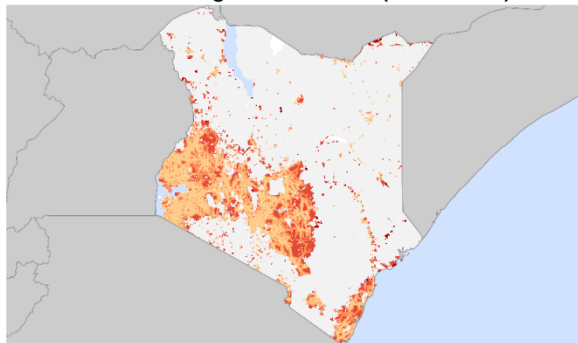

**Travel time as continuous variable ( MFL data)**

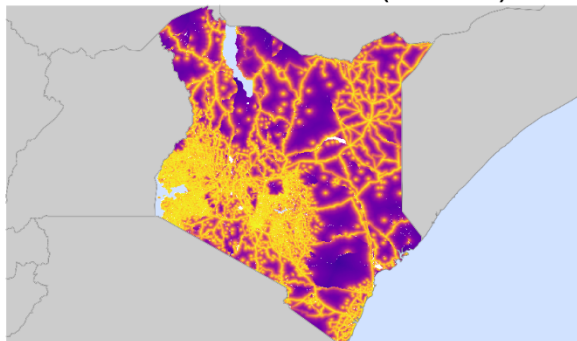

**Travel time as categorical variable ( MFL data)**

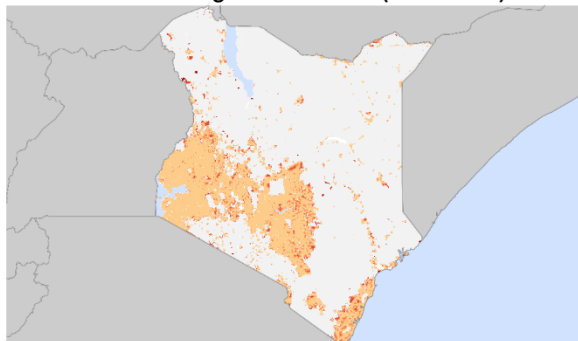

**Figure S73. Lesotho map of travel time to the nearest healthcare facility for adults aged  $\geq$  60 years**

**Population**

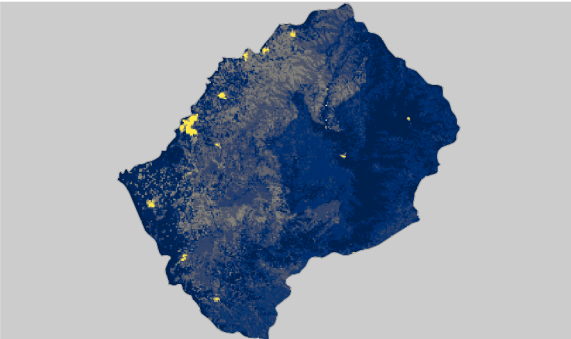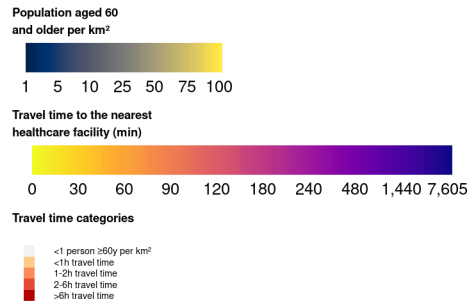

**Travel time as continuous variable ( combined data)**

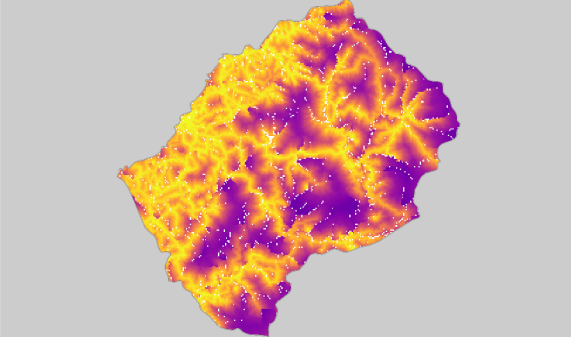

**Travel time as categorical variable ( combined data)**

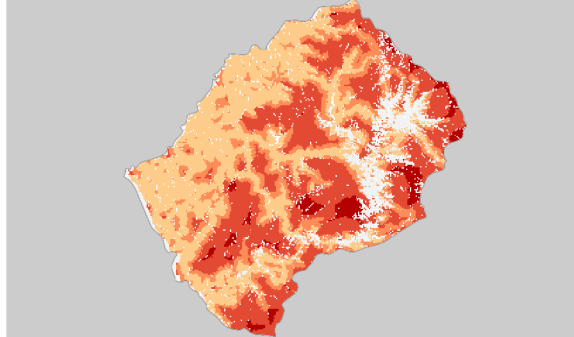

**Travel time as continuous variable ( OSM data)**

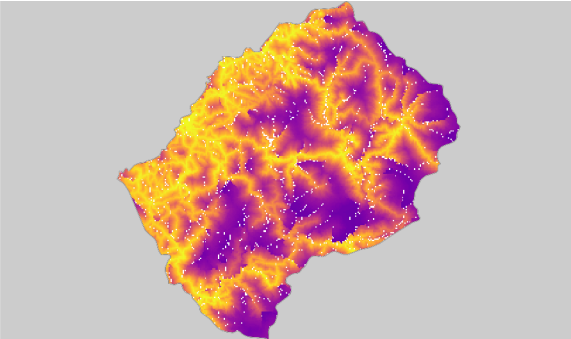

**Travel time as categorical variable ( OSM data)**

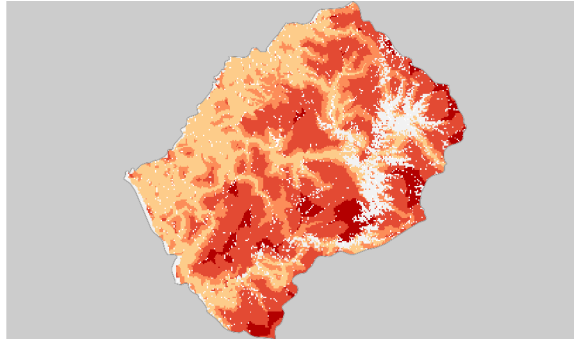

**Travel time as continuous variable ( MFL data)**

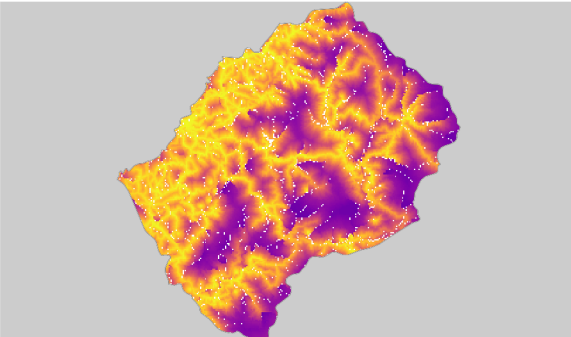

**Travel time as categorical variable ( MFL data)**

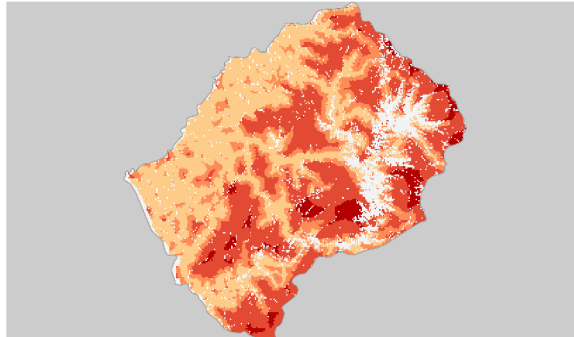

**Figure S74. Liberia map of travel time to the nearest healthcare facility for adults aged  $\geq 60$  years**

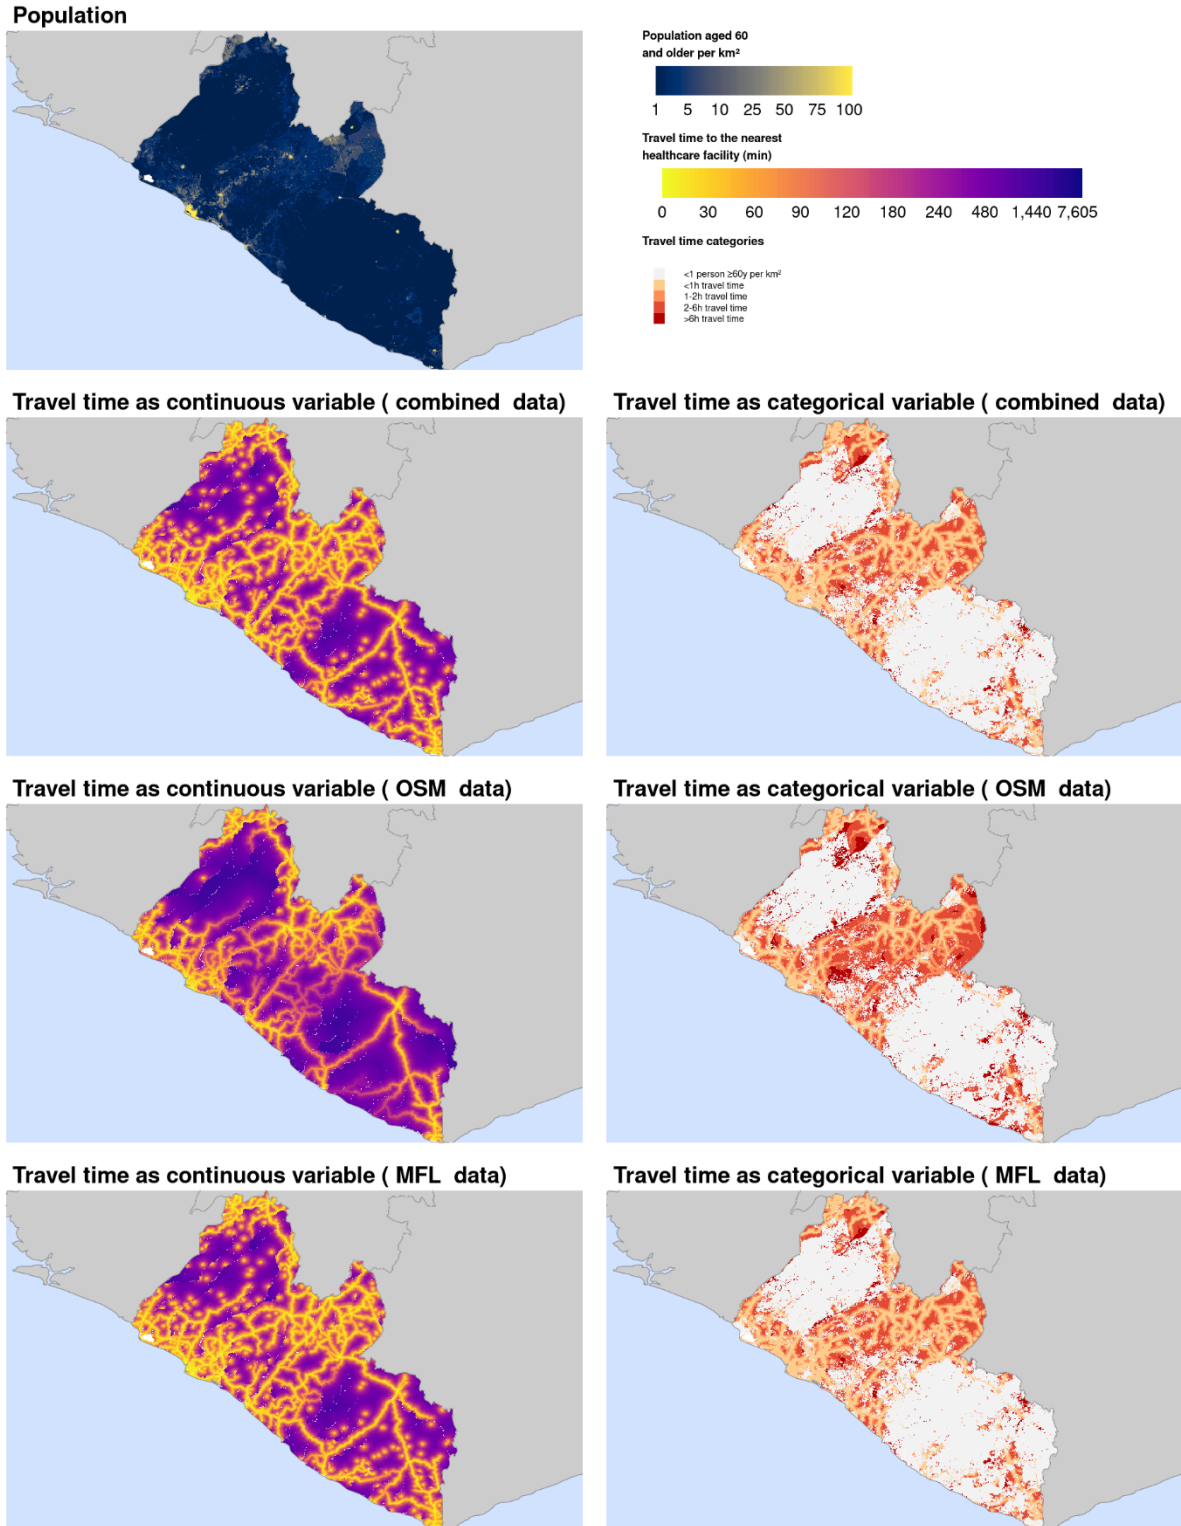

**Figure S75. Madagascar map of travel time to the nearest healthcare facility for adults aged  $\geq 60$  years**

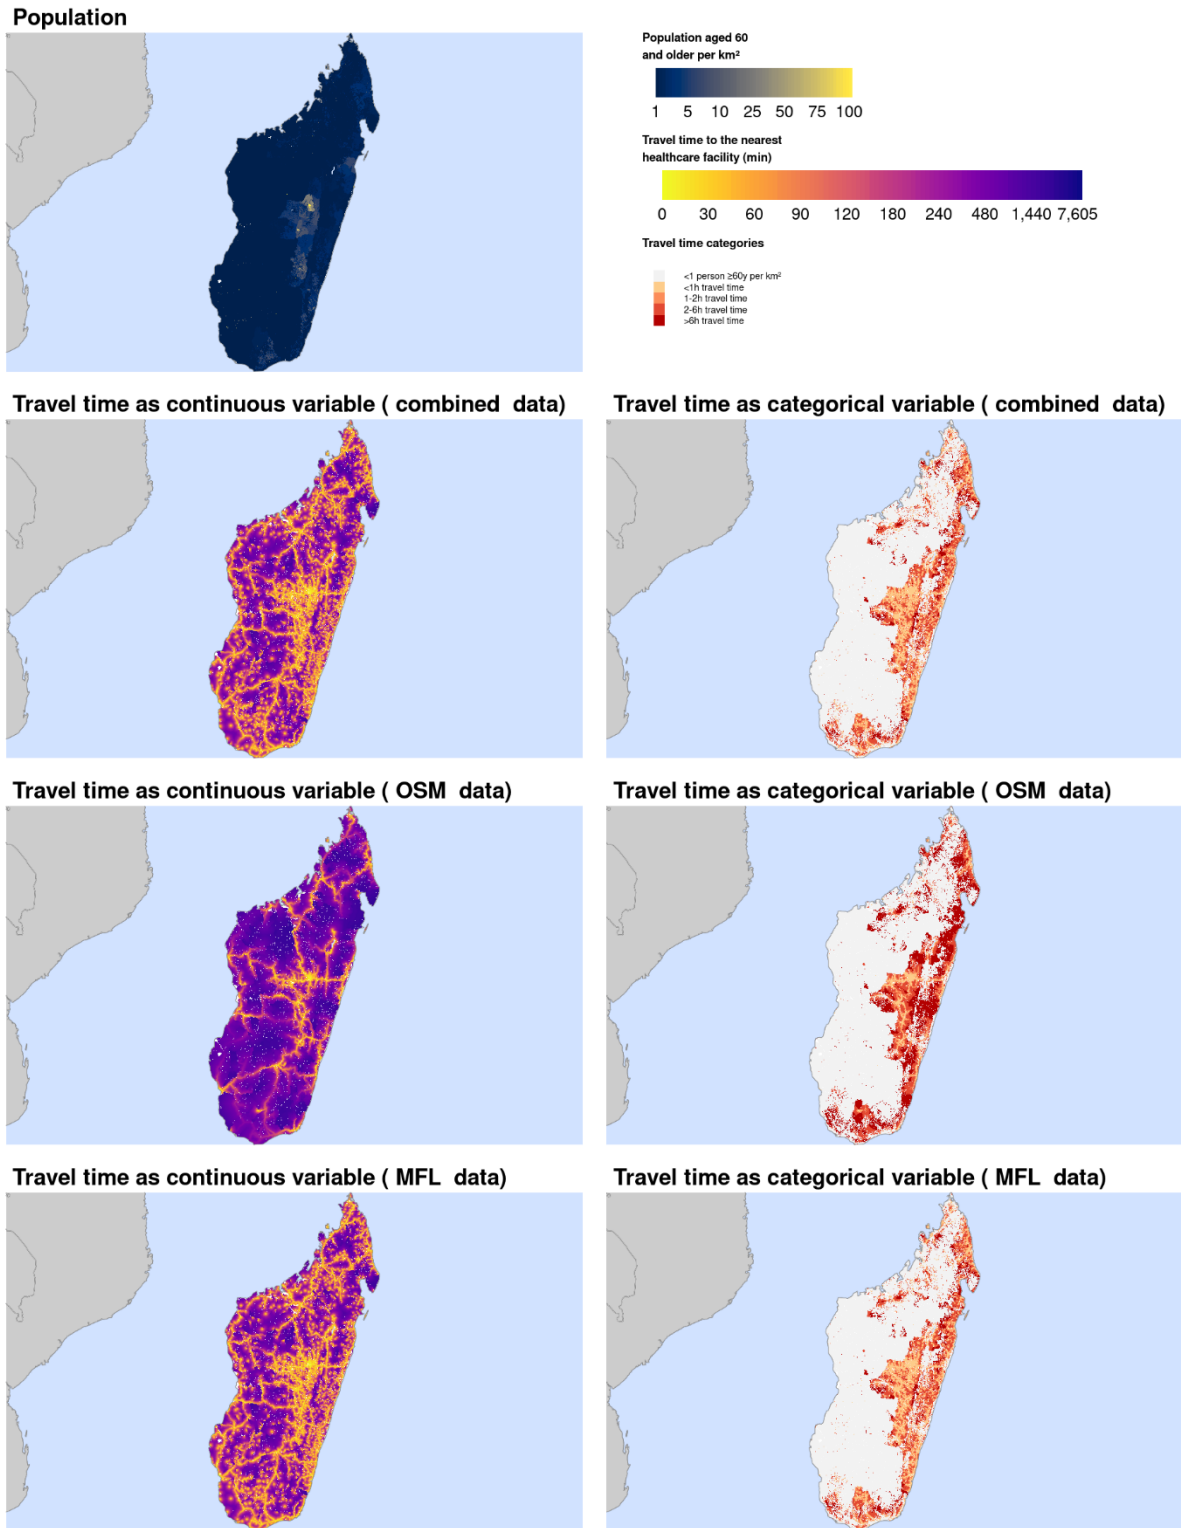

**Figure S76. Malawi map of travel time to the nearest healthcare facility for adults aged  $\geq 60$  years**

**Population**

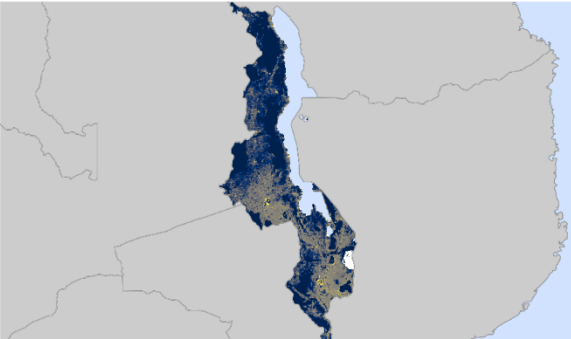

**Travel time as continuous variable ( combined data)**

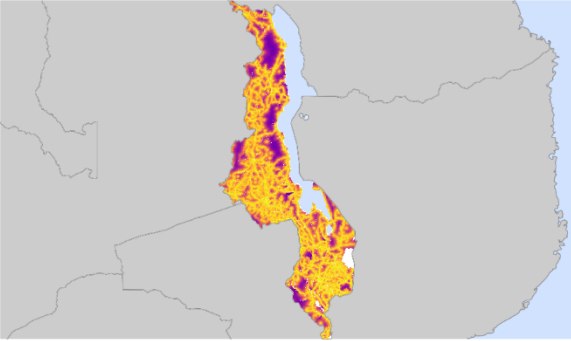

**Travel time as categorical variable ( combined data)**

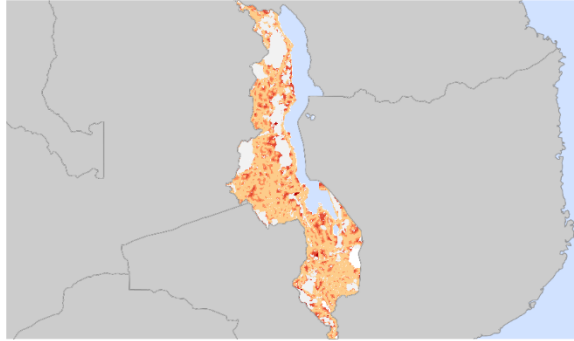

**Travel time as continuous variable ( OSM data)**

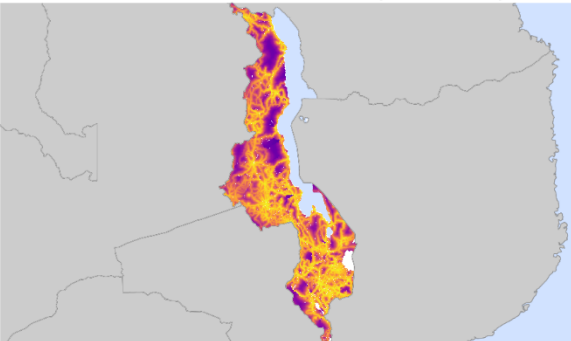

**Travel time as categorical variable ( OSM data)**

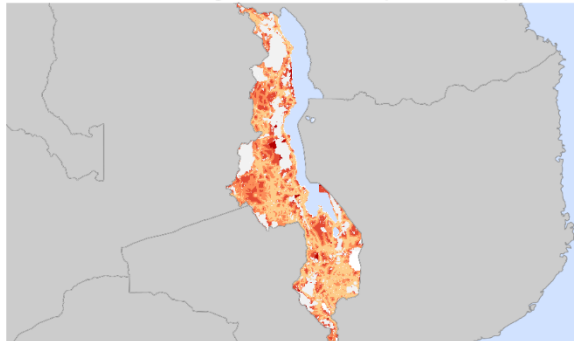

**Travel time as continuous variable ( MFL data)**

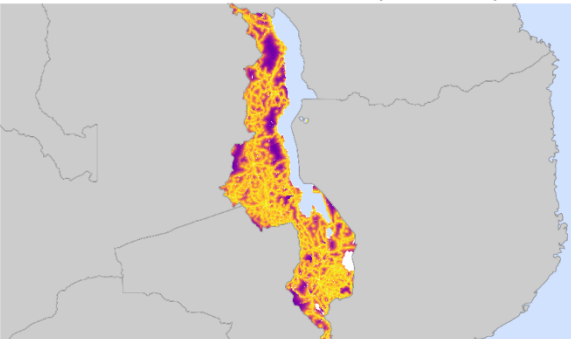

**Travel time as categorical variable ( MFL data)**

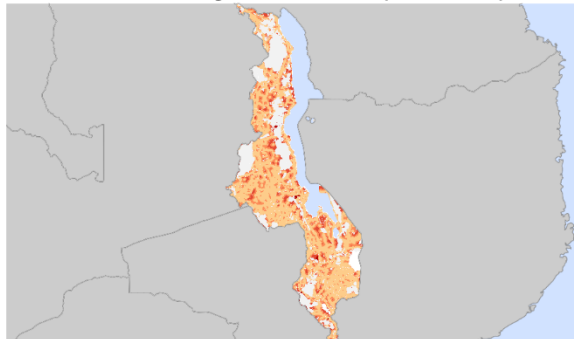

**Figure S77. Mali map of travel time to the nearest healthcare facility for adults aged  $\geq 60$  years**

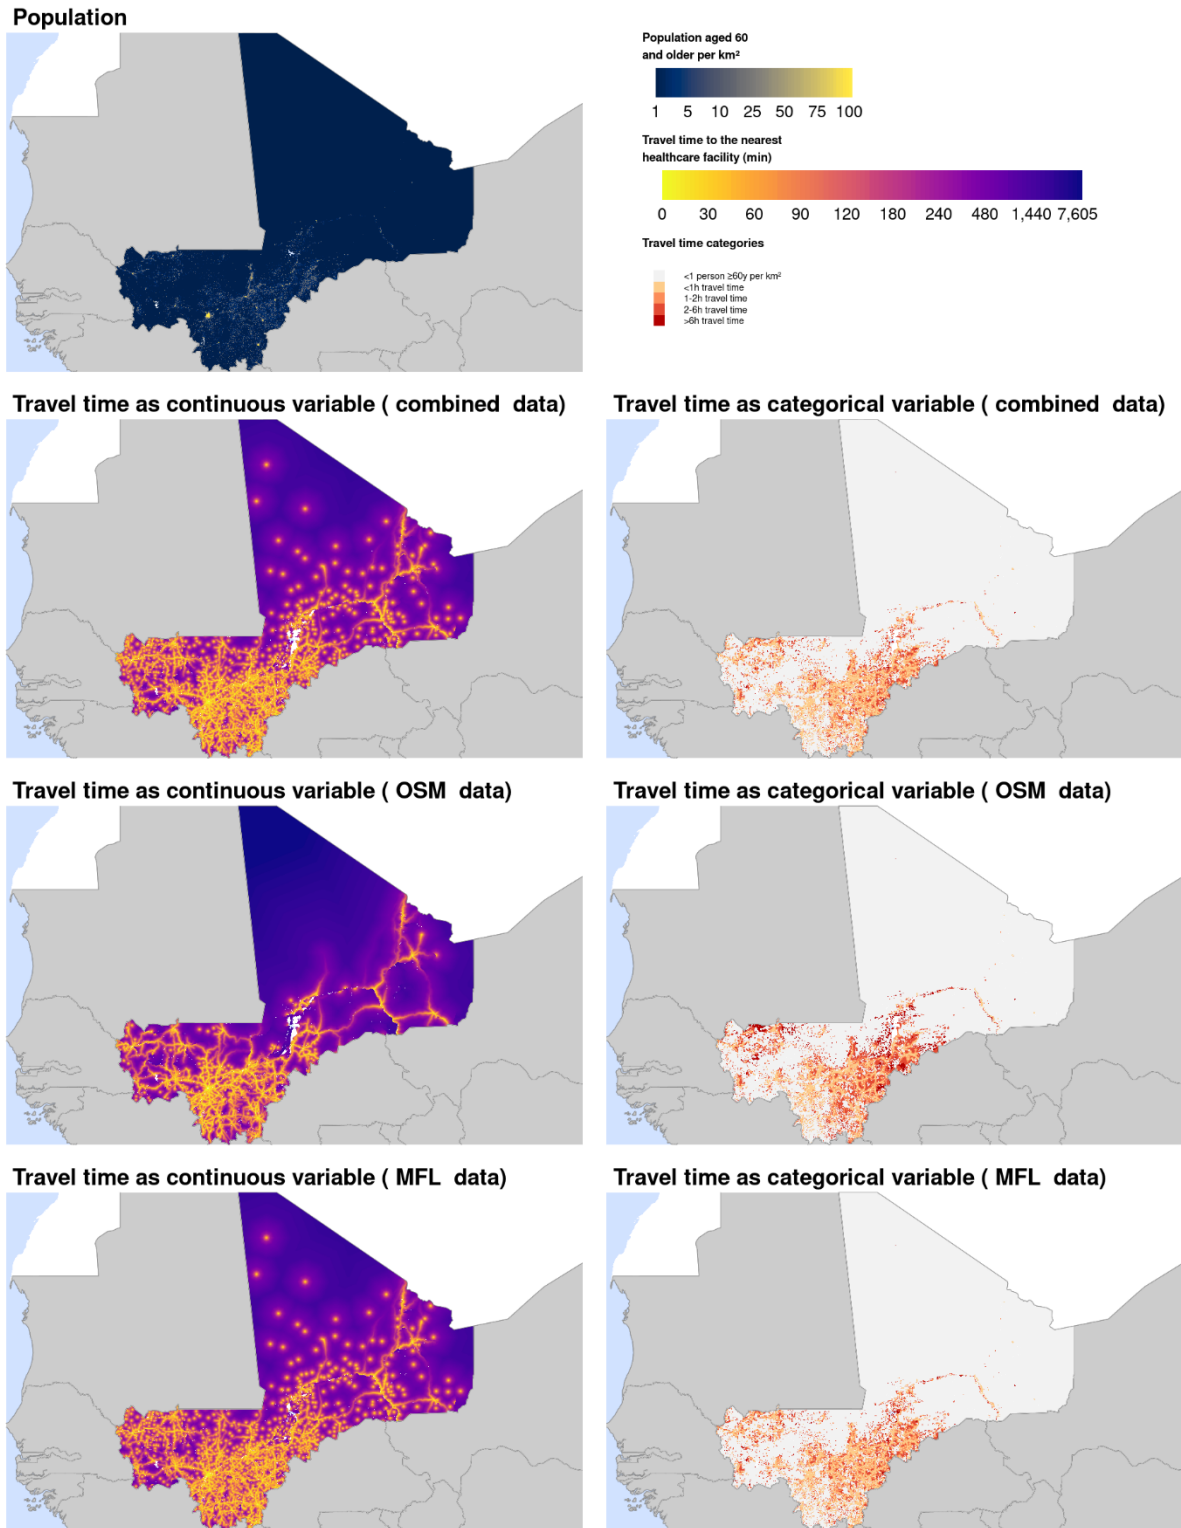

**Figure S78. Mauritania map of travel time to the nearest healthcare facility for adults aged  $\geq 60$  years**

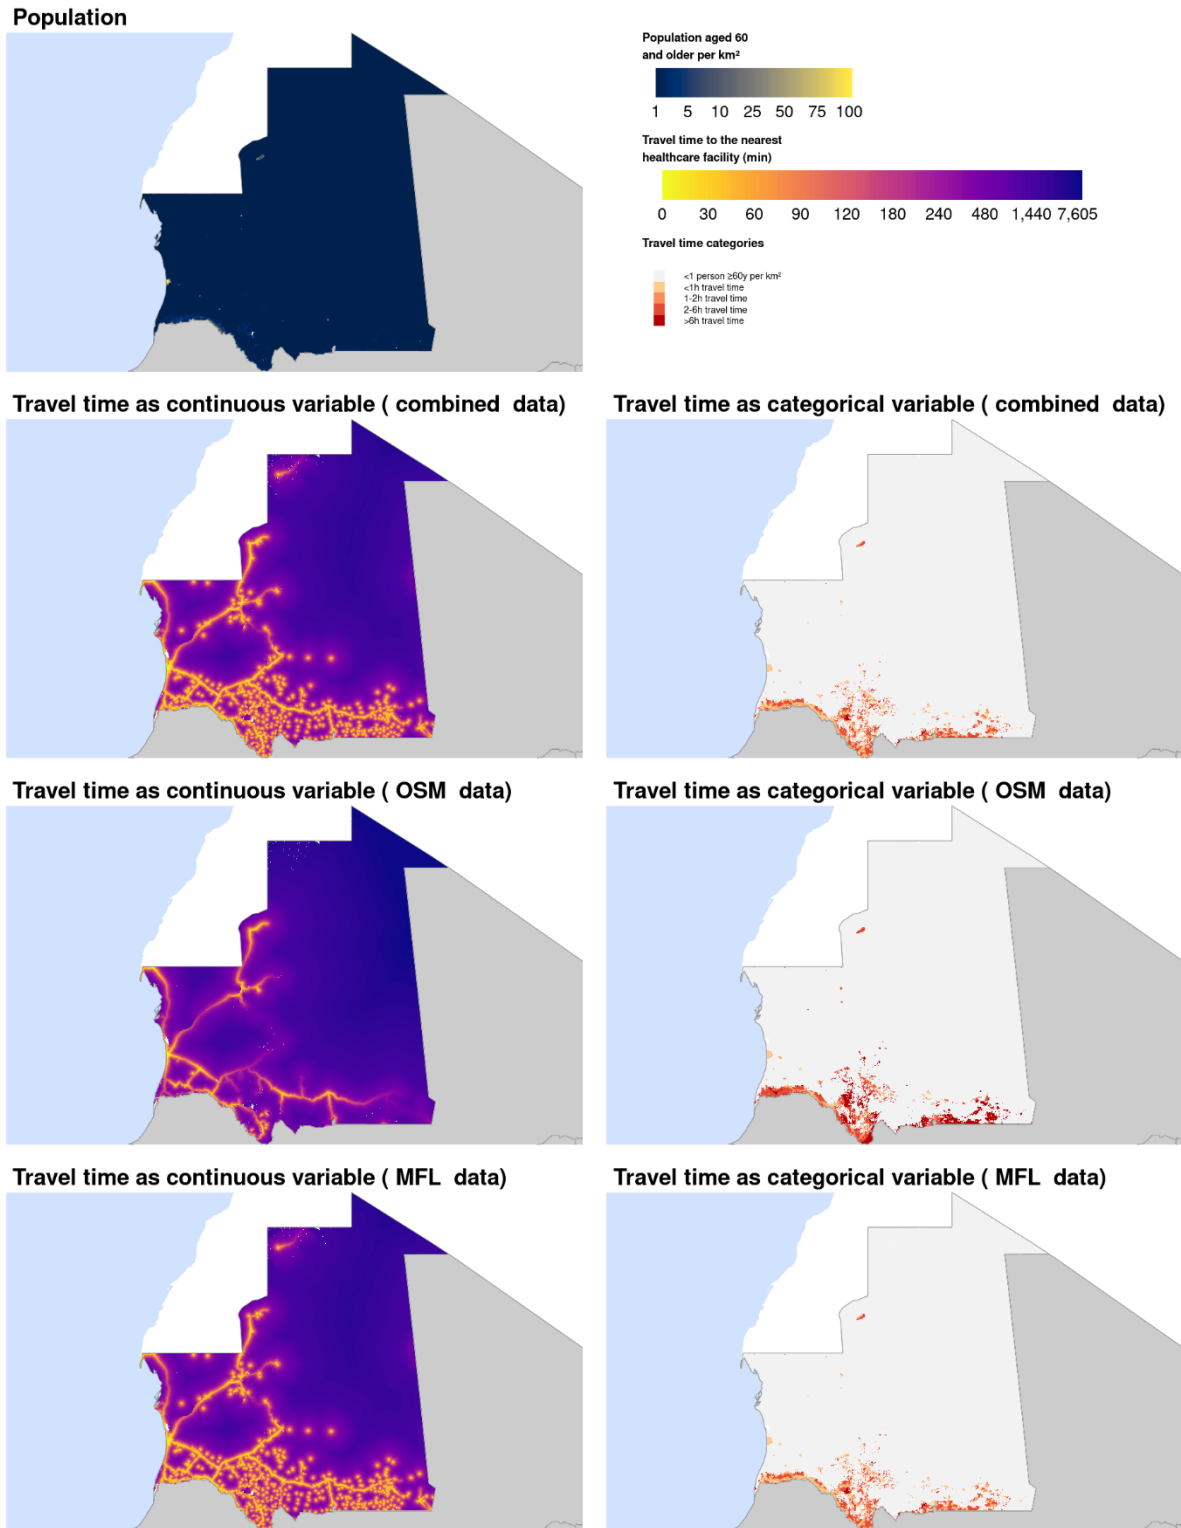

**Figure S79. Mozambique map of travel time to the nearest healthcare facility for adults aged  $\geq 60$  years**

**Population**

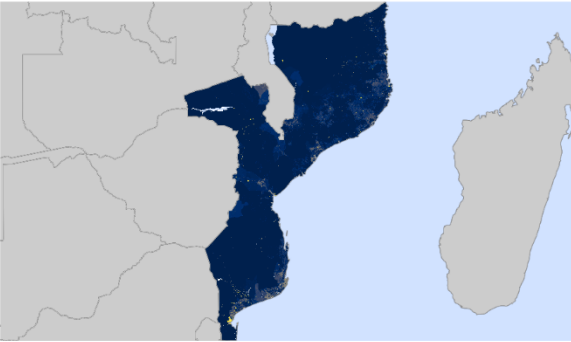

Population aged 60 and older per km<sup>2</sup>

1 5 10 25 50 75 100

Travel time to the nearest healthcare facility (min)

0 30 60 90 120 180 240 480 1,440 7,605

Travel time categories

<1 person 250y per km<sup>2</sup>  
 <1h travel time  
 1-2h travel time  
 2-6h travel time  
 >6h travel time

**Travel time as continuous variable ( combined data)**

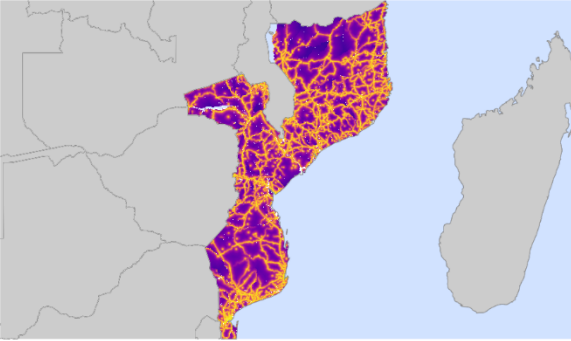

**Travel time as categorical variable ( combined data)**

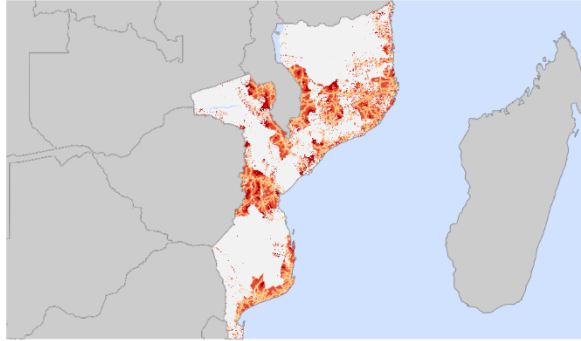

**Travel time as continuous variable ( OSM data)**

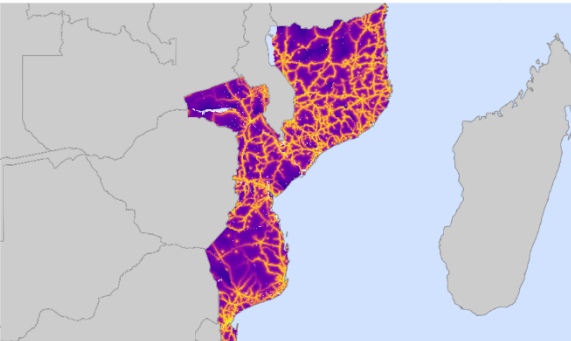

**Travel time as categorical variable ( OSM data)**

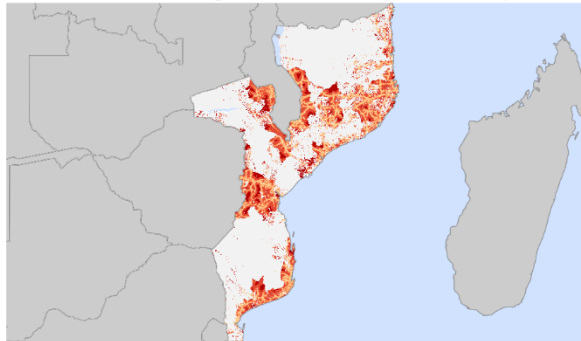

**Travel time as continuous variable ( MFL data)**

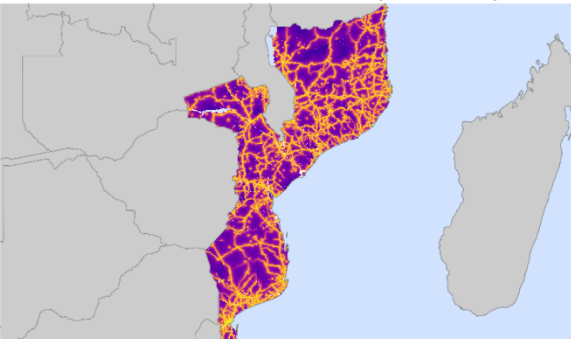

**Travel time as categorical variable ( MFL data)**

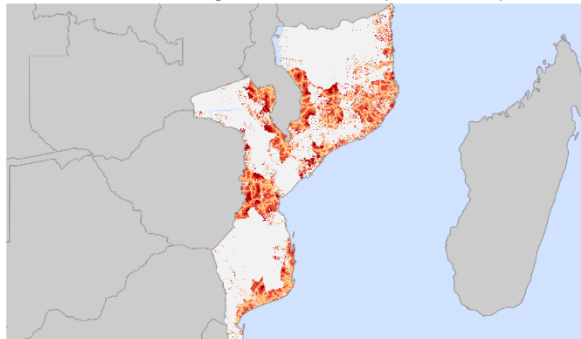



**Figure S80. Namibia map of travel time to the nearest healthcare facility for adults aged  $\geq 60$  years**

**Population**

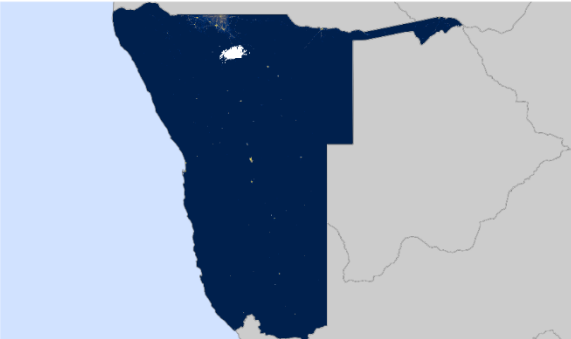

**Population aged 60 and older per km<sup>2</sup>**

1 5 10 25 50 75 100

**Travel time to the nearest healthcare facility (min)**

0 30 60 90 120 180 240 480 1,440 7,605

**Travel time categories**

<1 person ≥60y per km<sup>2</sup>  
 <1h travel time  
 1-2h travel time  
 2-6h travel time  
 >6h travel time

**Travel time as continuous variable ( combined data)**

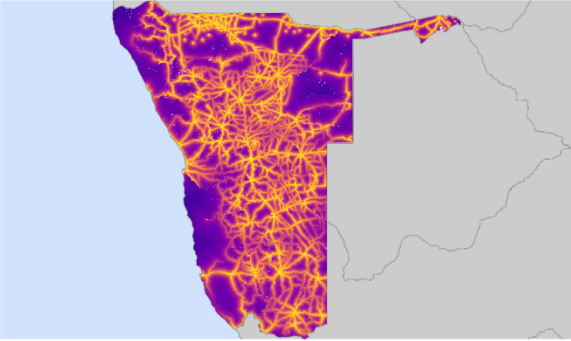

**Travel time as categorical variable ( combined data)**

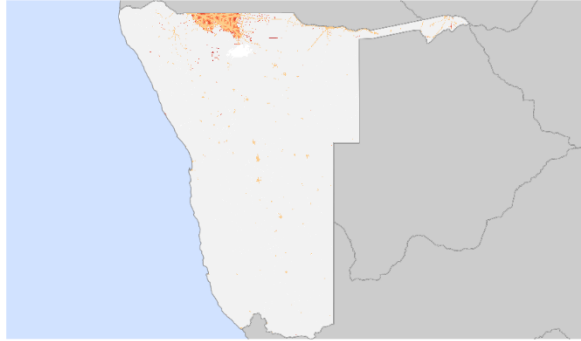

**Travel time as continuous variable ( OSM data)**

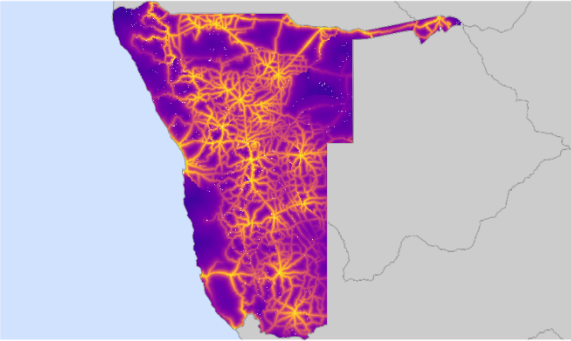

**Travel time as categorical variable ( OSM data)**

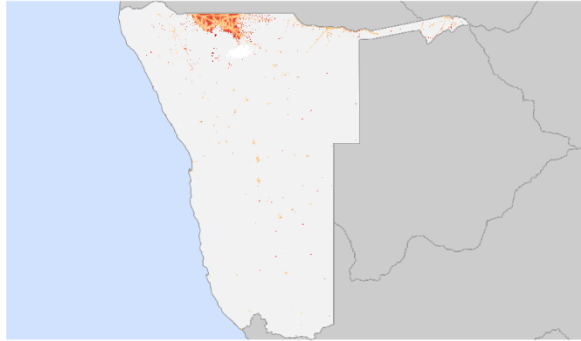

**Travel time as continuous variable ( MFL data)**

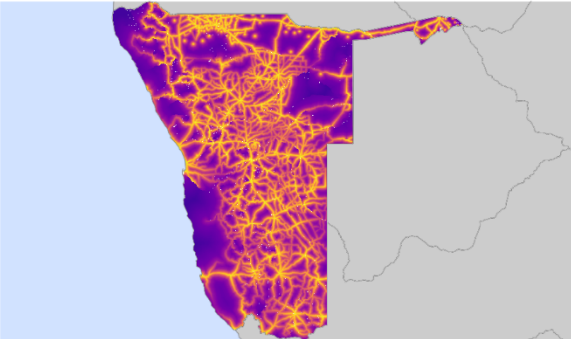

**Travel time as categorical variable ( MFL data)**

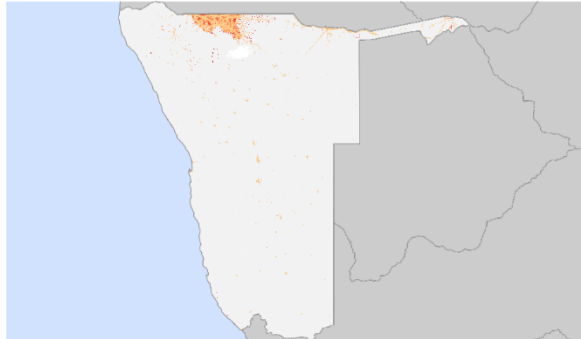

**Figure S81. Niger map of travel time to the nearest healthcare facility for adults aged  $\geq 60$  years**

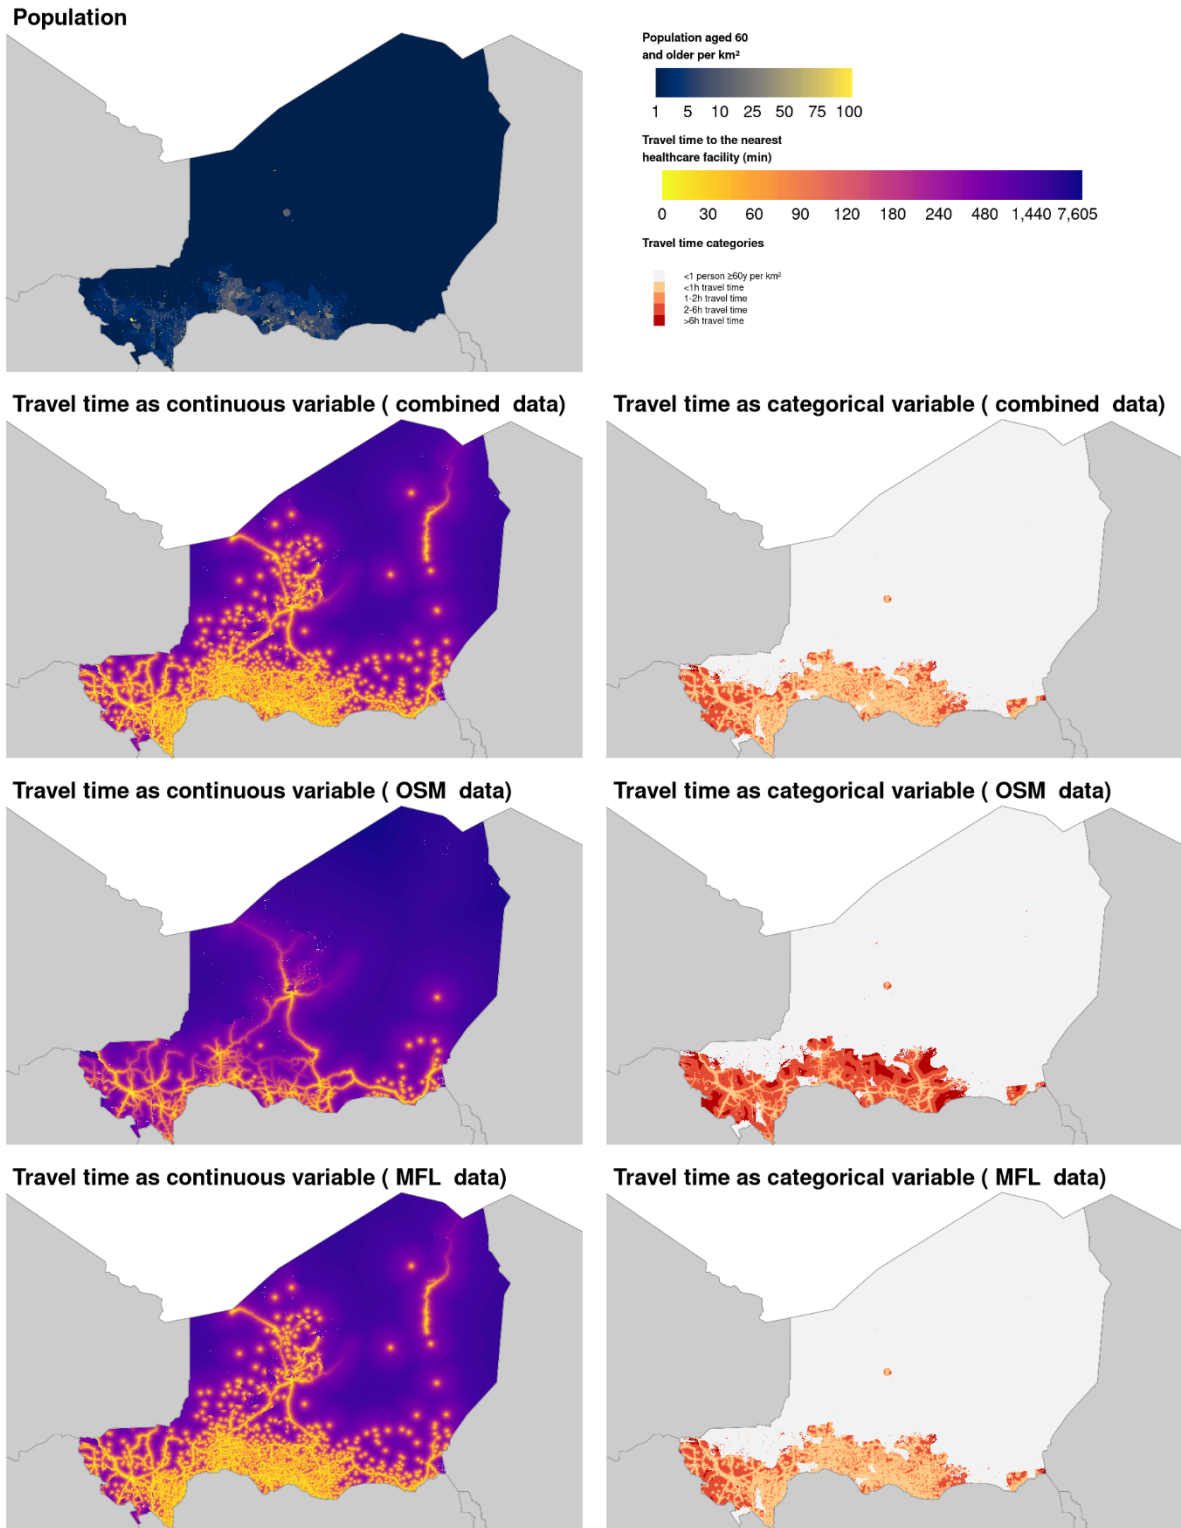

**Figure S82. Nigeria map of travel time to the nearest healthcare facility for adults aged  $\geq 60$  years**

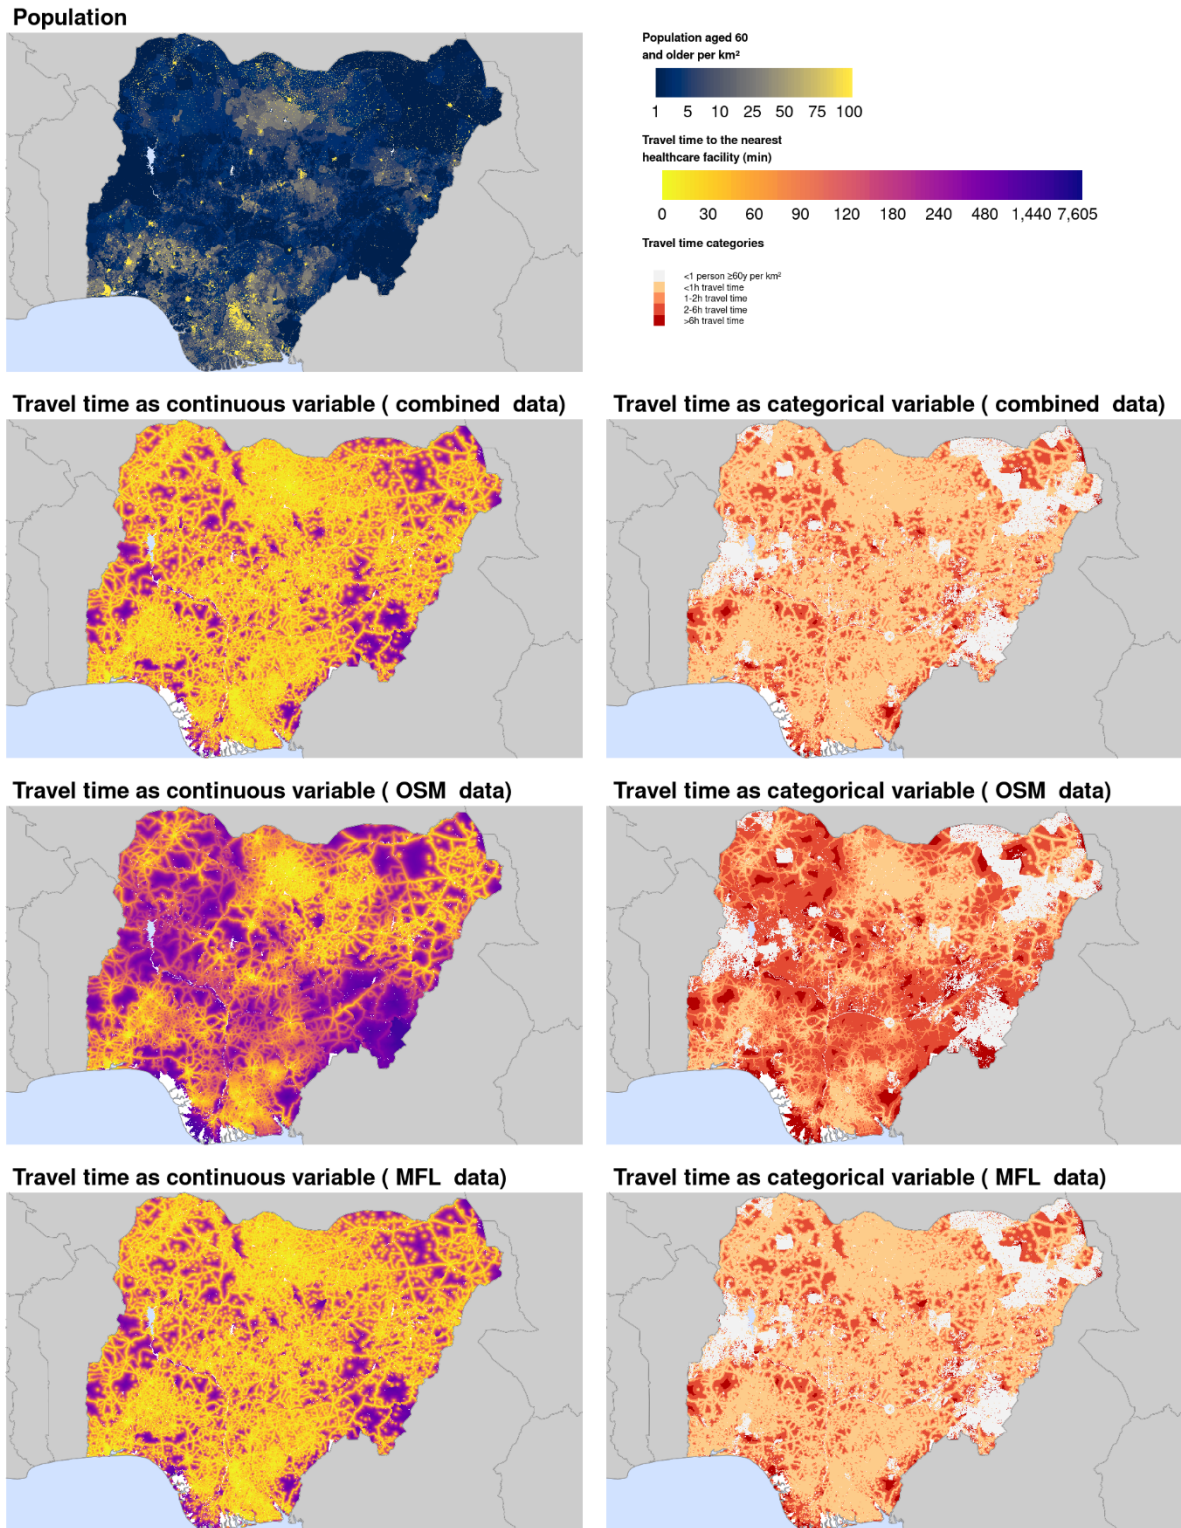

**Figure S83. Republic of the Congo map of travel time to the nearest healthcare facility for adults aged  $\geq 60$  years**

**Population**

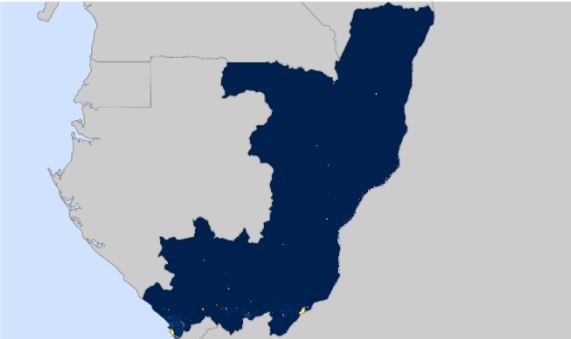

**Travel time as continuous variable ( combined data)**

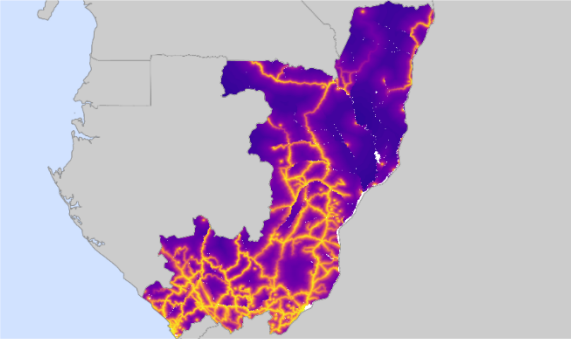

**Travel time as categorical variable ( combined data)**

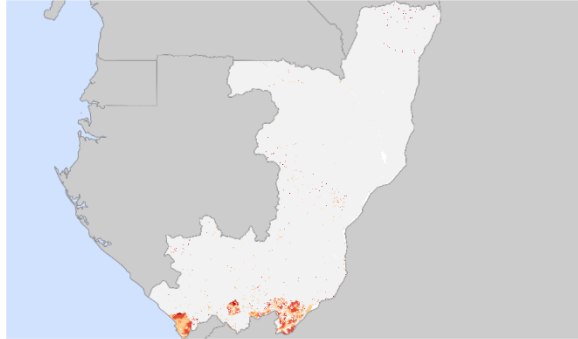

**Travel time as continuous variable ( OSM data)**

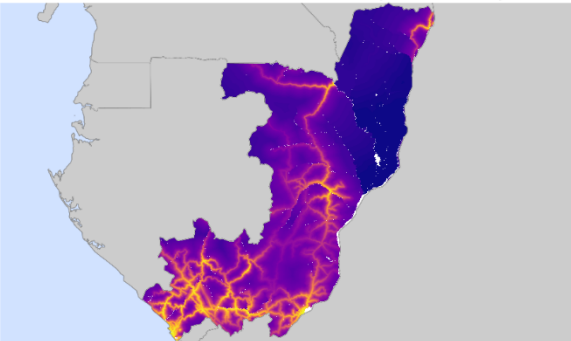

**Travel time as categorical variable ( OSM data)**

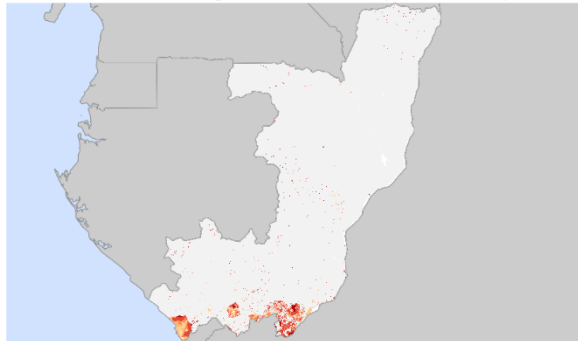

**Travel time as continuous variable ( MFL data)**

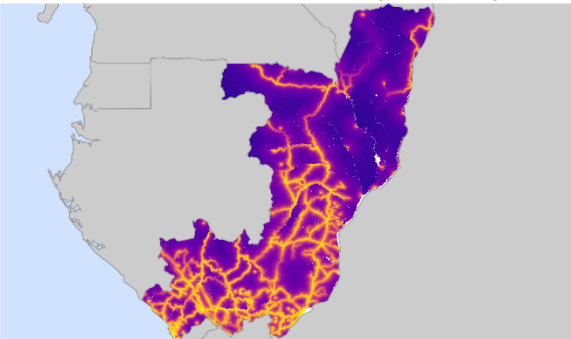

**Travel time as categorical variable ( MFL data)**

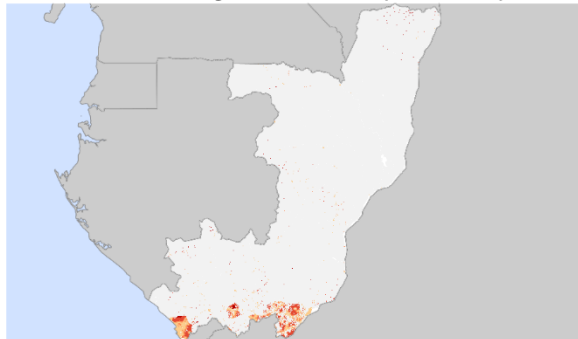

**Figure S84. Rwanda map of travel time to the nearest healthcare facility for adults aged  $\geq 60$  years**

**Population**

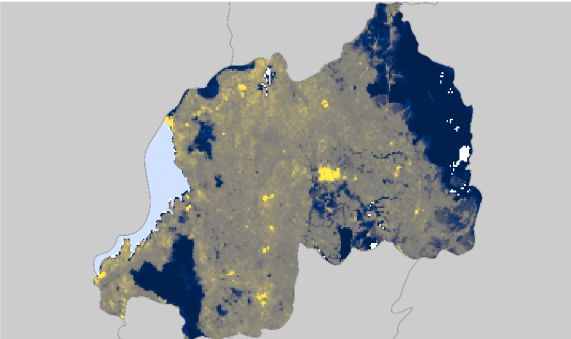

**Travel time as continuous variable ( combined data)**

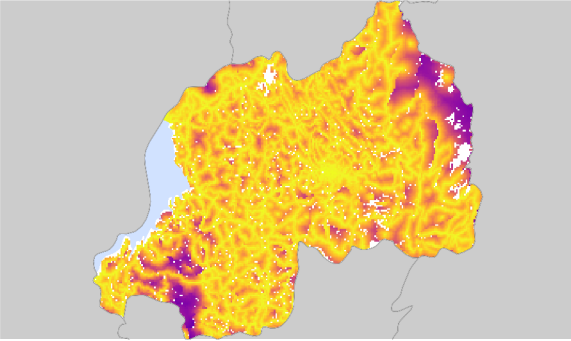

**Travel time as categorical variable ( combined data)**

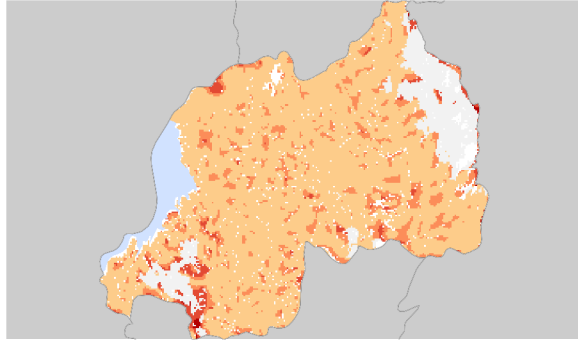

**Travel time as continuous variable ( OSM data)**

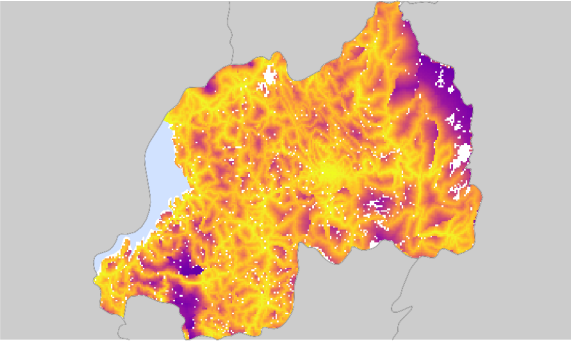

**Travel time as categorical variable ( OSM data)**

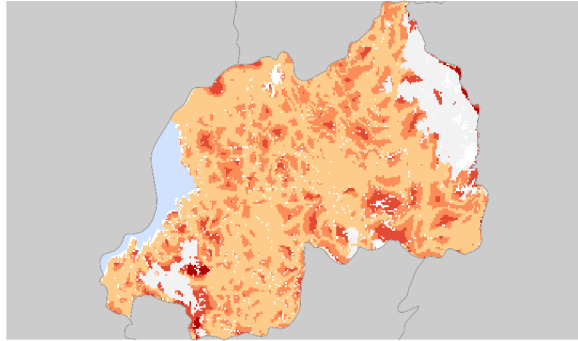

**Travel time as continuous variable ( MFL data)**

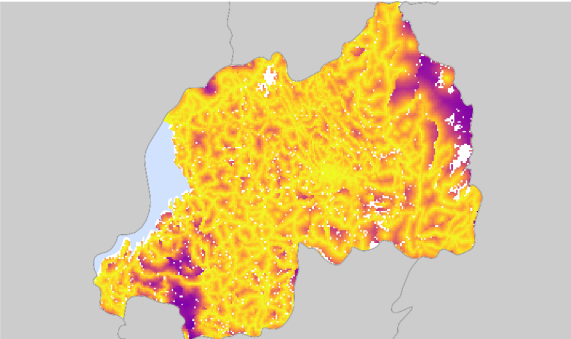

**Travel time as categorical variable ( MFL data)**

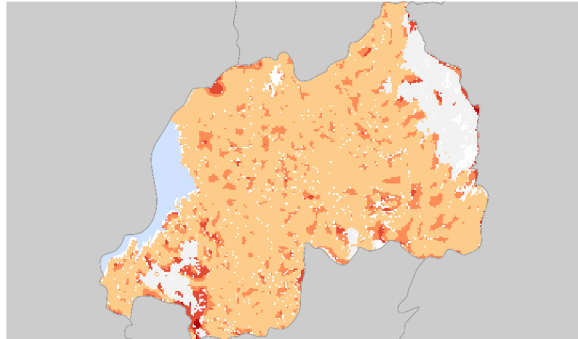

**Figure S85. Senegal map of travel time to the nearest healthcare facility for adults aged  $\geq 60$  years**

**Population**

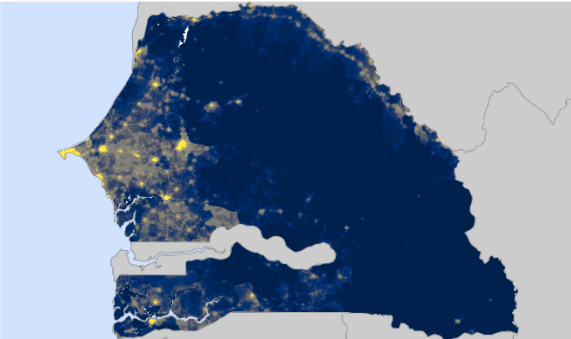

**Travel time as continuous variable ( combined data)**

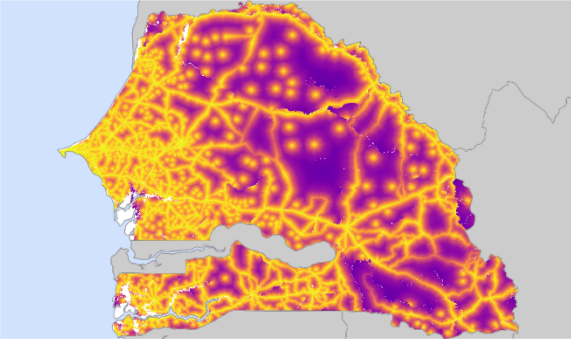

**Travel time as categorical variable ( combined data)**

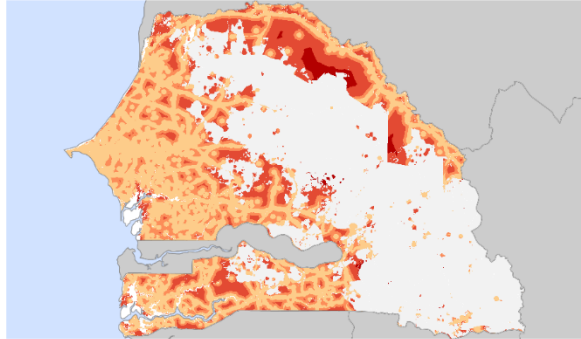

**Travel time as continuous variable ( OSM data)**

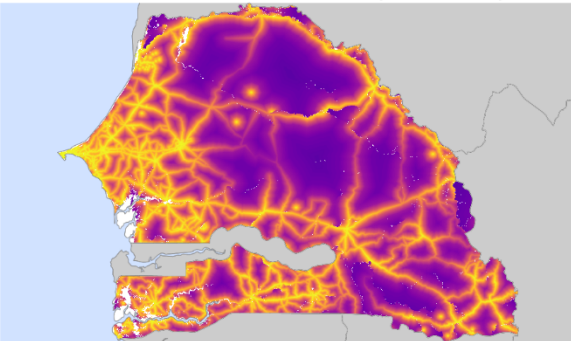

**Travel time as categorical variable ( OSM data)**

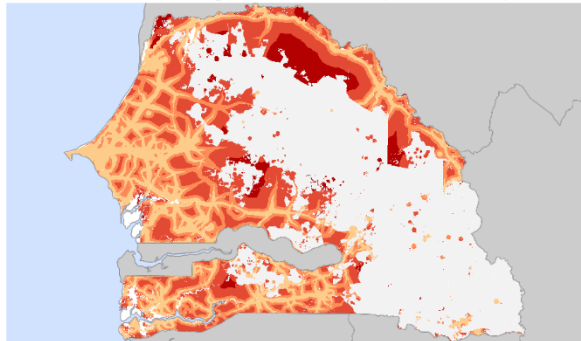

**Travel time as continuous variable ( MFL data)**

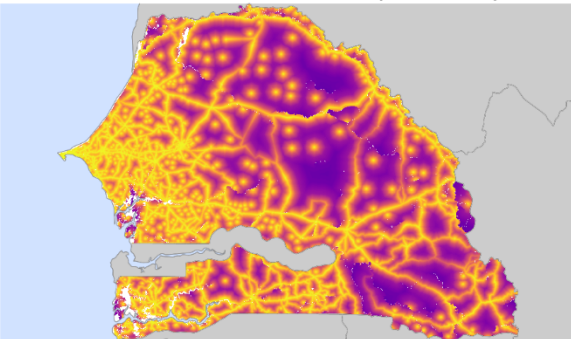

**Travel time as categorical variable ( MFL data)**

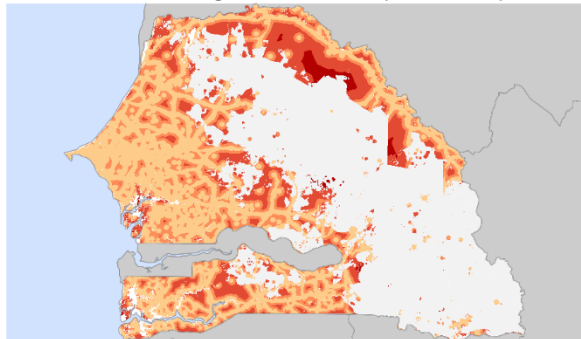

**Figure S86. Sierra Leone map of travel time to the nearest healthcare facility for adults aged  $\geq 60$  years**

**Population**

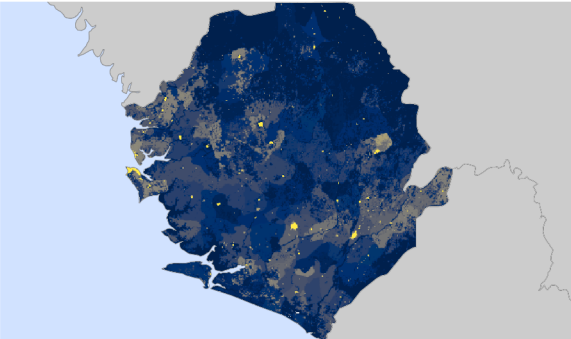

Population aged 60 and older per km<sup>2</sup>

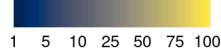

Travel time to the nearest healthcare facility (min)

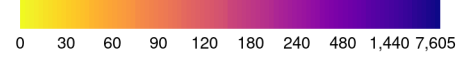

Travel time categories

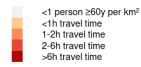

**Travel time as continuous variable ( combined data)**

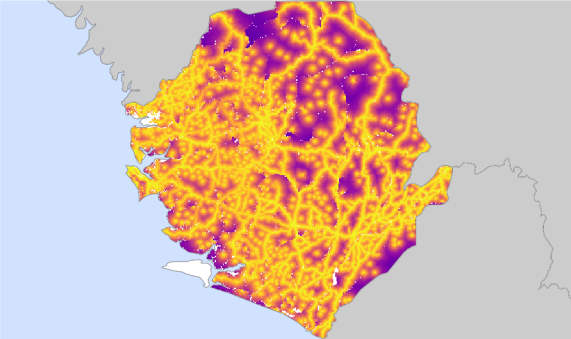

**Travel time as categorical variable ( combined data)**

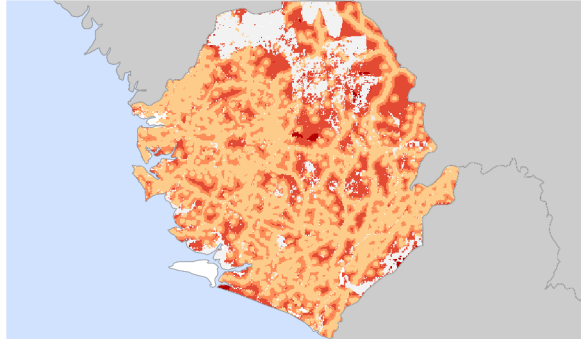

**Travel time as continuous variable ( OSM data)**

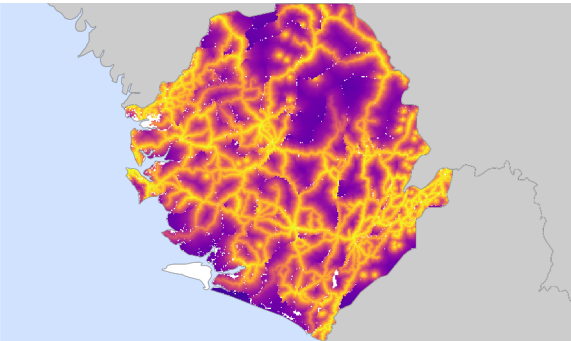

**Travel time as categorical variable ( OSM data)**

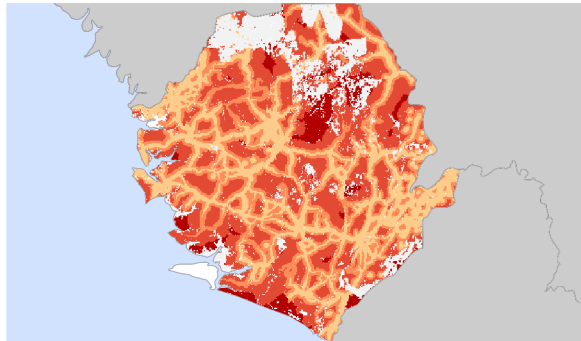

**Travel time as continuous variable ( MFL data)**

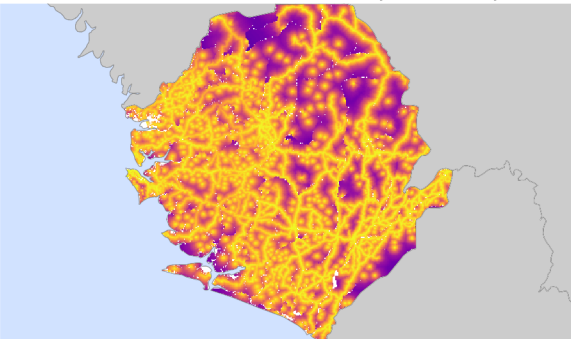

**Travel time as categorical variable ( MFL data)**

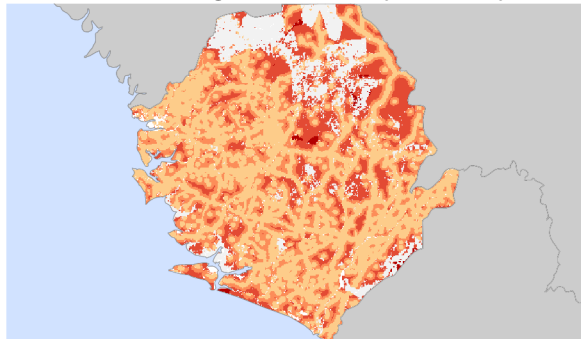

**Figure S87. Somalia map of travel time to the nearest healthcare facility for adults aged  $\geq 60$  years**

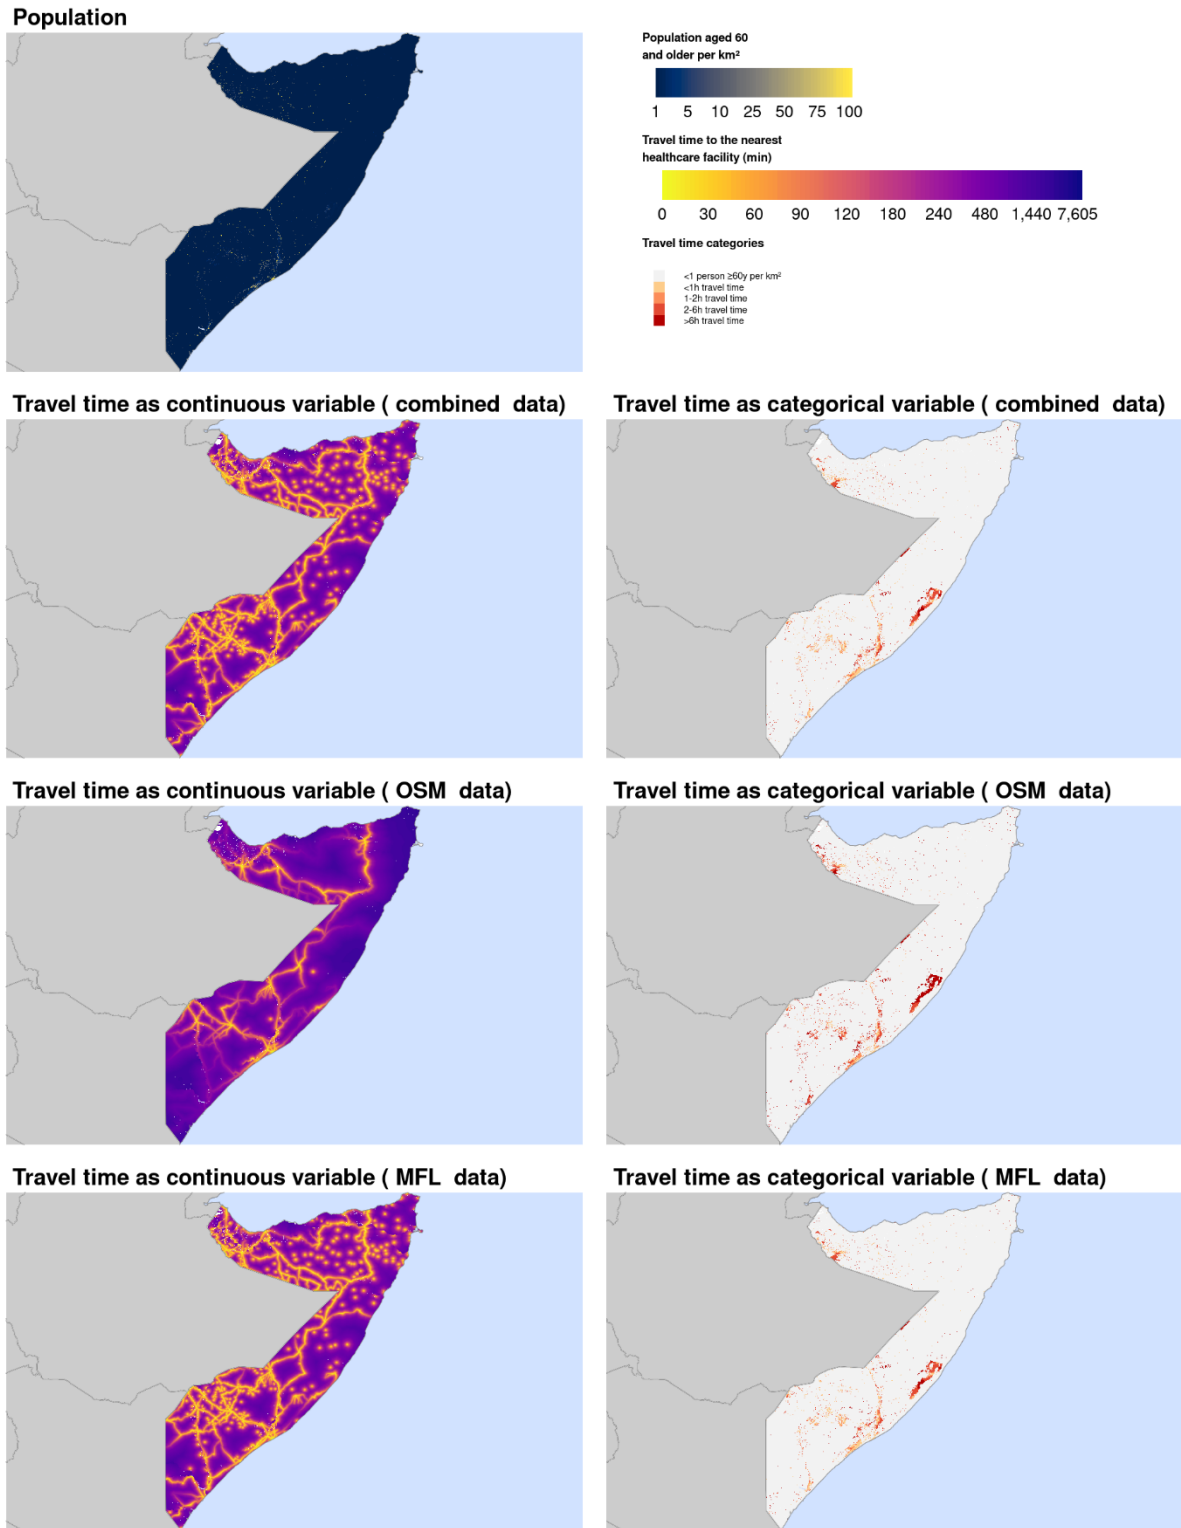



**Figure S88. South Africa map of travel time to the nearest healthcare facility for adults aged  $\geq 60$  years**

**Population**

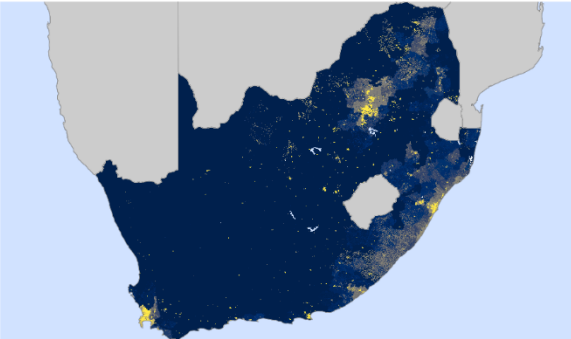

Population aged 60 and older per km<sup>2</sup>

1 5 10 25 50 75 100

Travel time to the nearest healthcare facility (min)

0 30 60 90 120 180 240 480 1,440 7,605

Travel time categories

- <1 person ≥60y per km<sup>2</sup>
- <1h travel time
- 1-2h travel time
- 2-6h travel time
- >6h travel time

**Travel time as continuous variable ( combined data)**

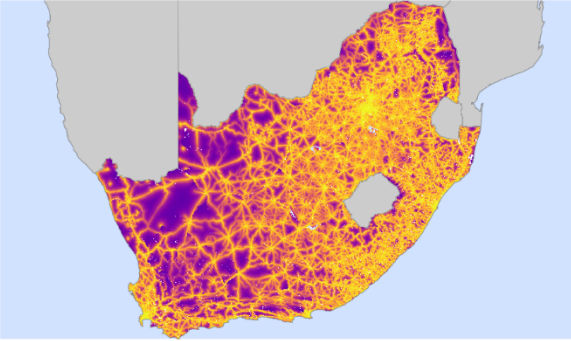

**Travel time as categorical variable ( combined data)**

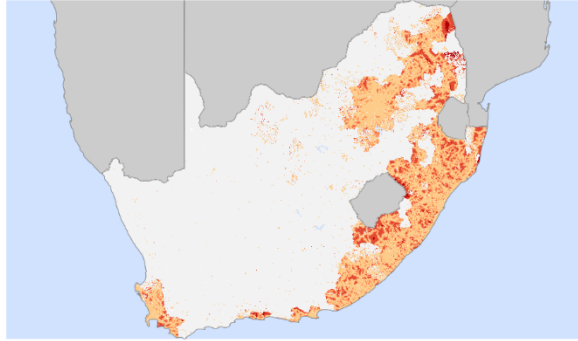

**Travel time as continuous variable ( OSM data)**

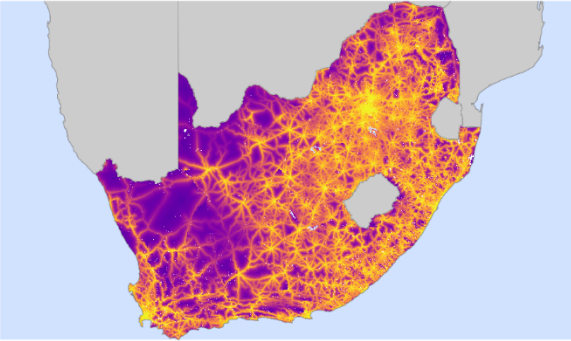

**Travel time as categorical variable ( OSM data)**

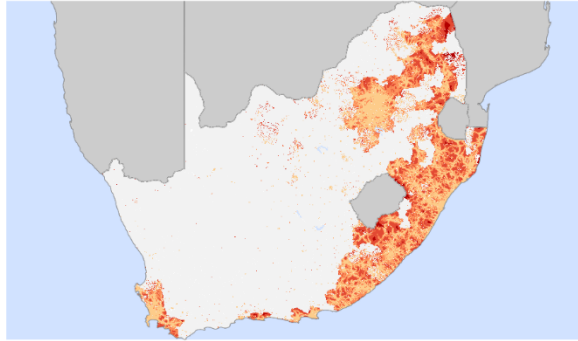

**Travel time as continuous variable ( MFL data)**

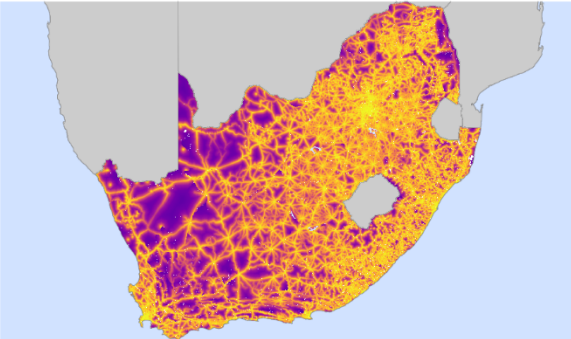

**Travel time as categorical variable ( MFL data)**

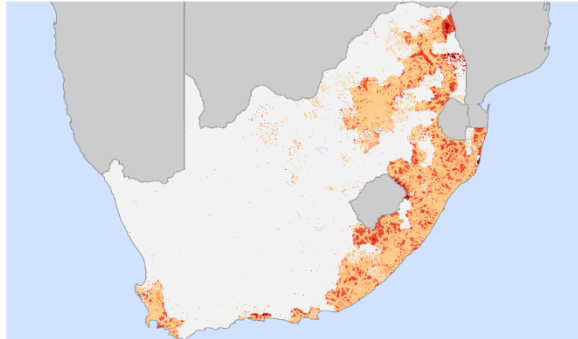

**Figure S89. South Sudan map of travel time to the nearest healthcare facility for adults aged  $\geq 60$  years**

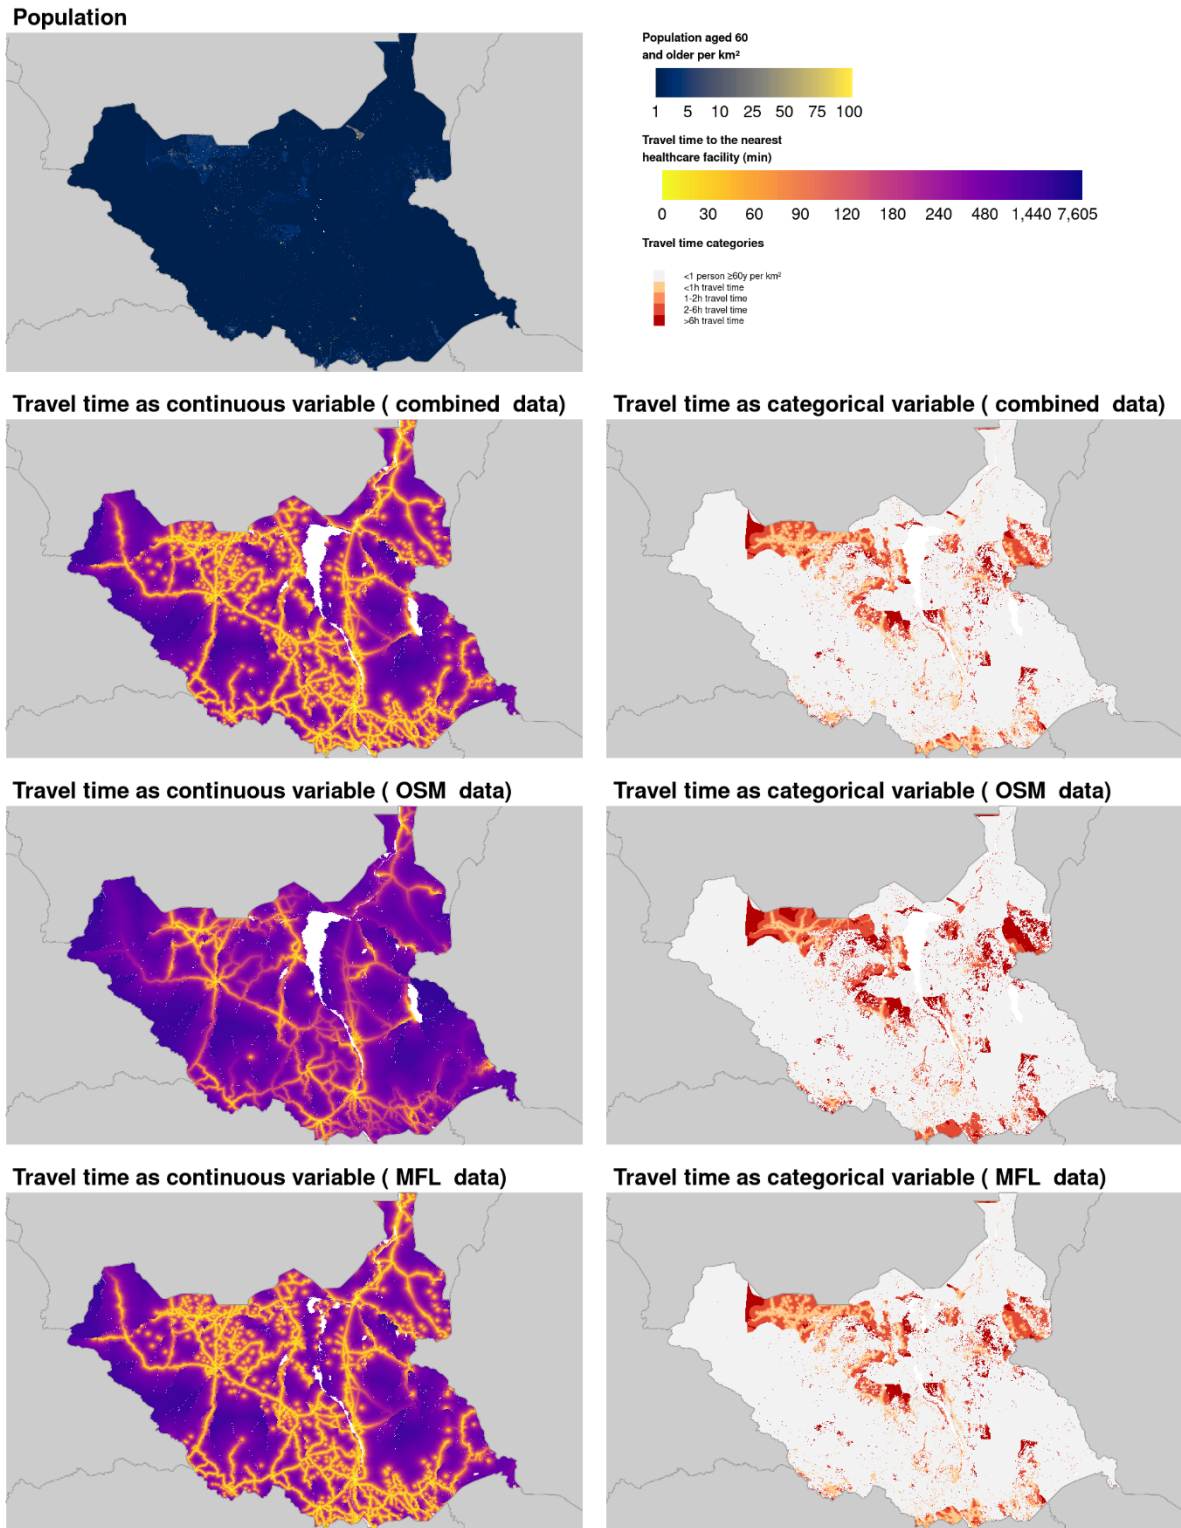

**Figure S90. Sudan map of travel time to the nearest healthcare facility for adults aged  $\geq 60$  years**

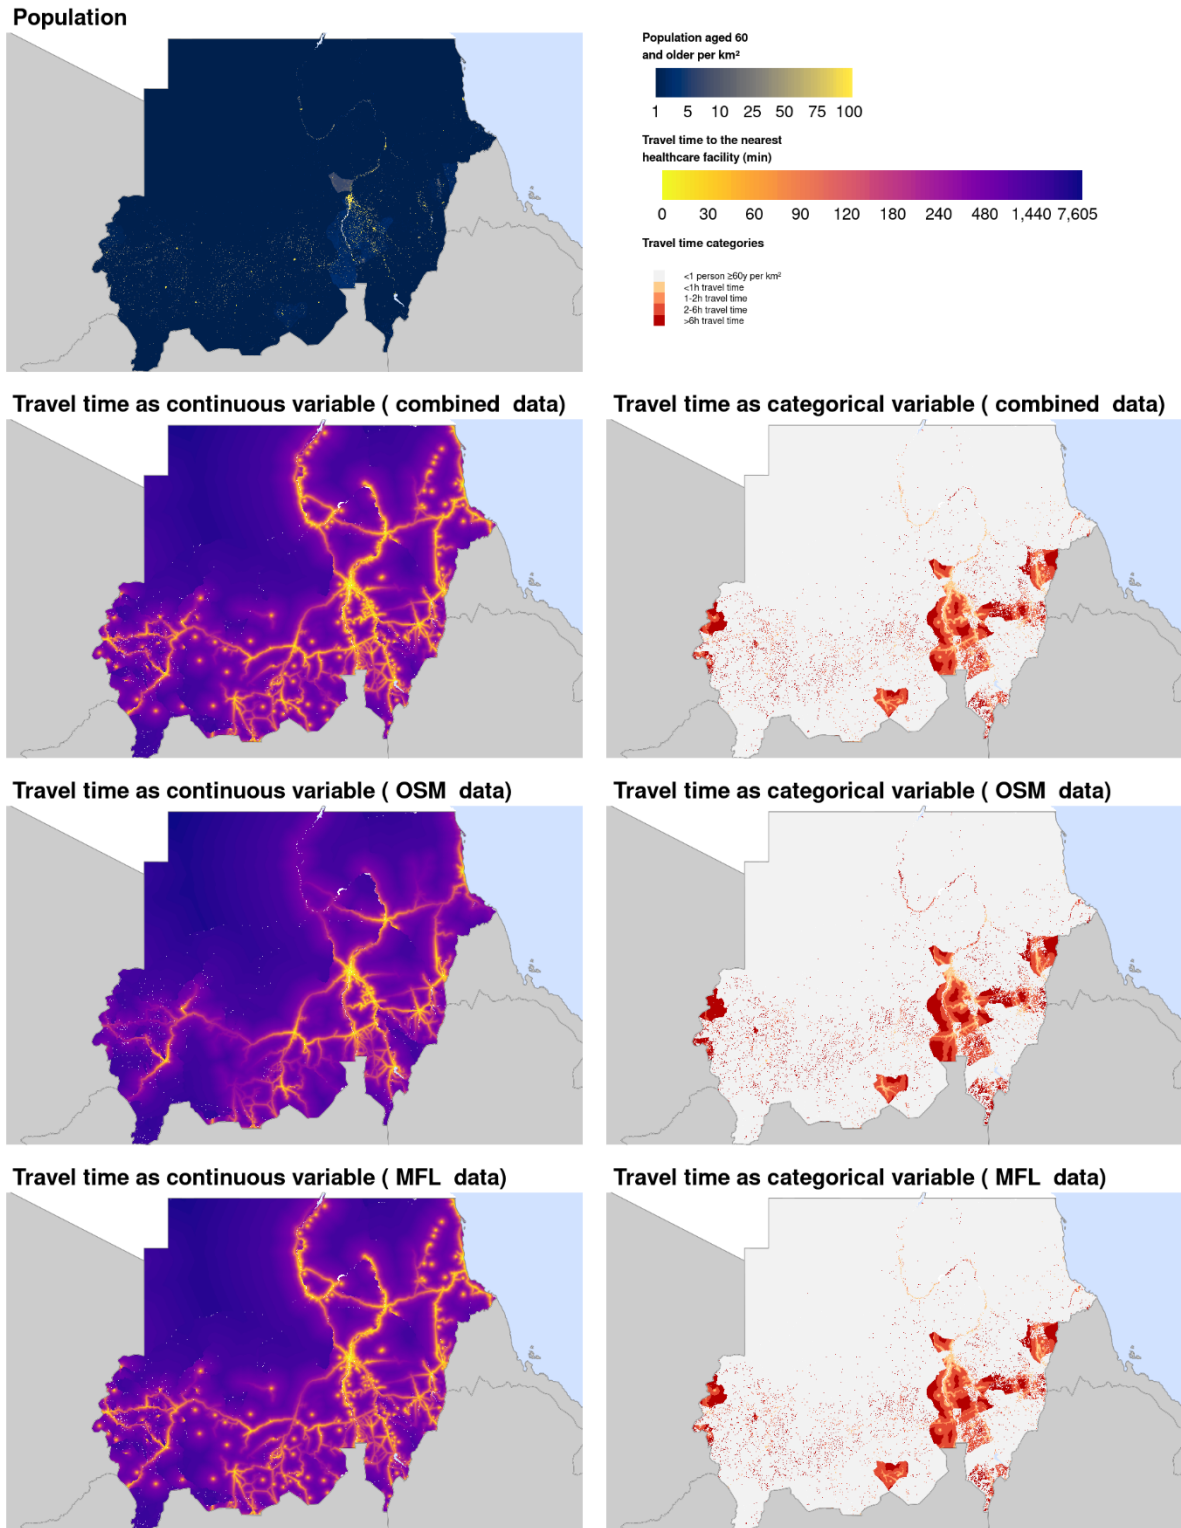

**Figure S91. Tanzania map of travel time to the nearest healthcare facility for adults aged  $\geq 60$  years**

**Population**

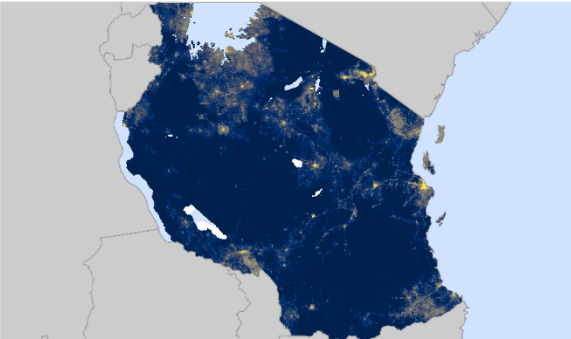

**Travel time as continuous variable ( combined data)**

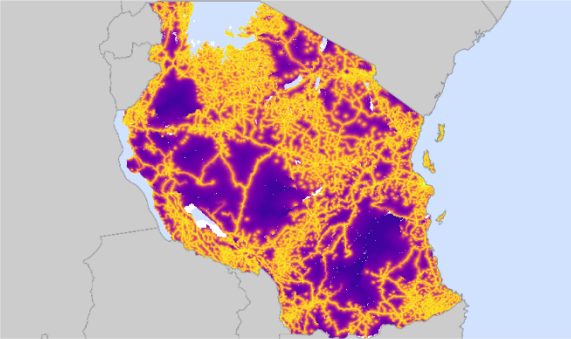

**Travel time as categorical variable ( combined data)**

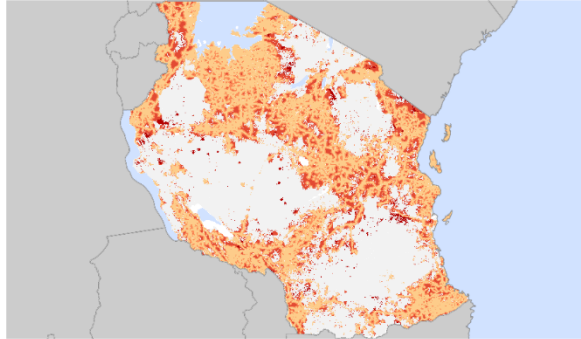

**Travel time as continuous variable ( OSM data)**

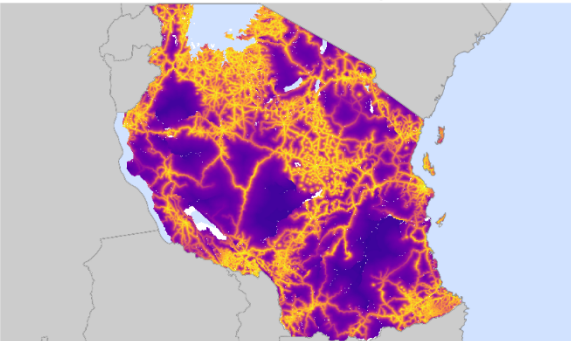

**Travel time as categorical variable ( OSM data)**

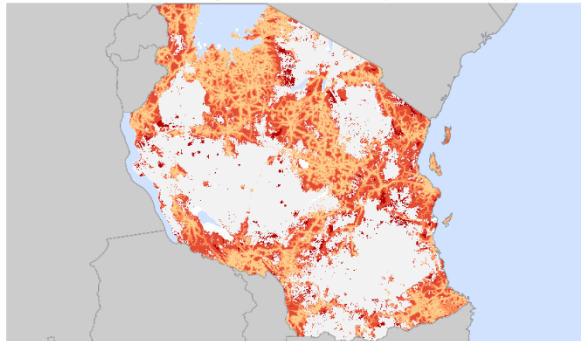

**Travel time as continuous variable ( MFL data)**

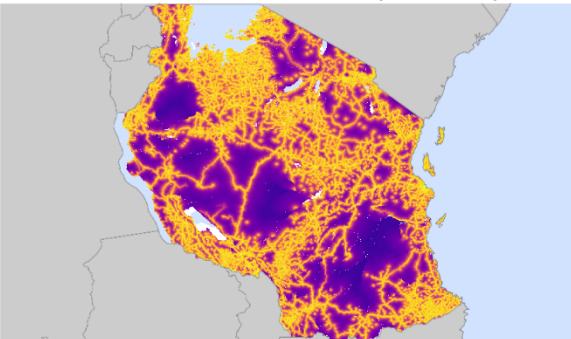

**Travel time as categorical variable ( MFL data)**

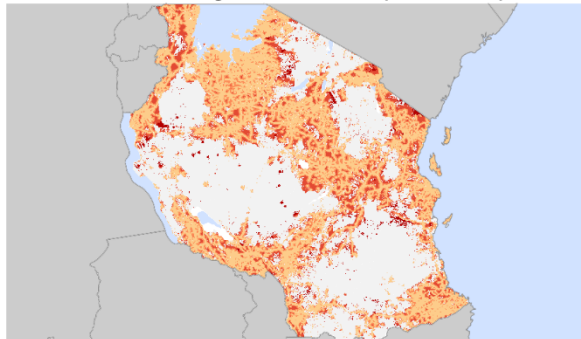

**Figure S92. The Gambia map of travel time to the nearest healthcare facility for adults aged  $\geq 60$  years**

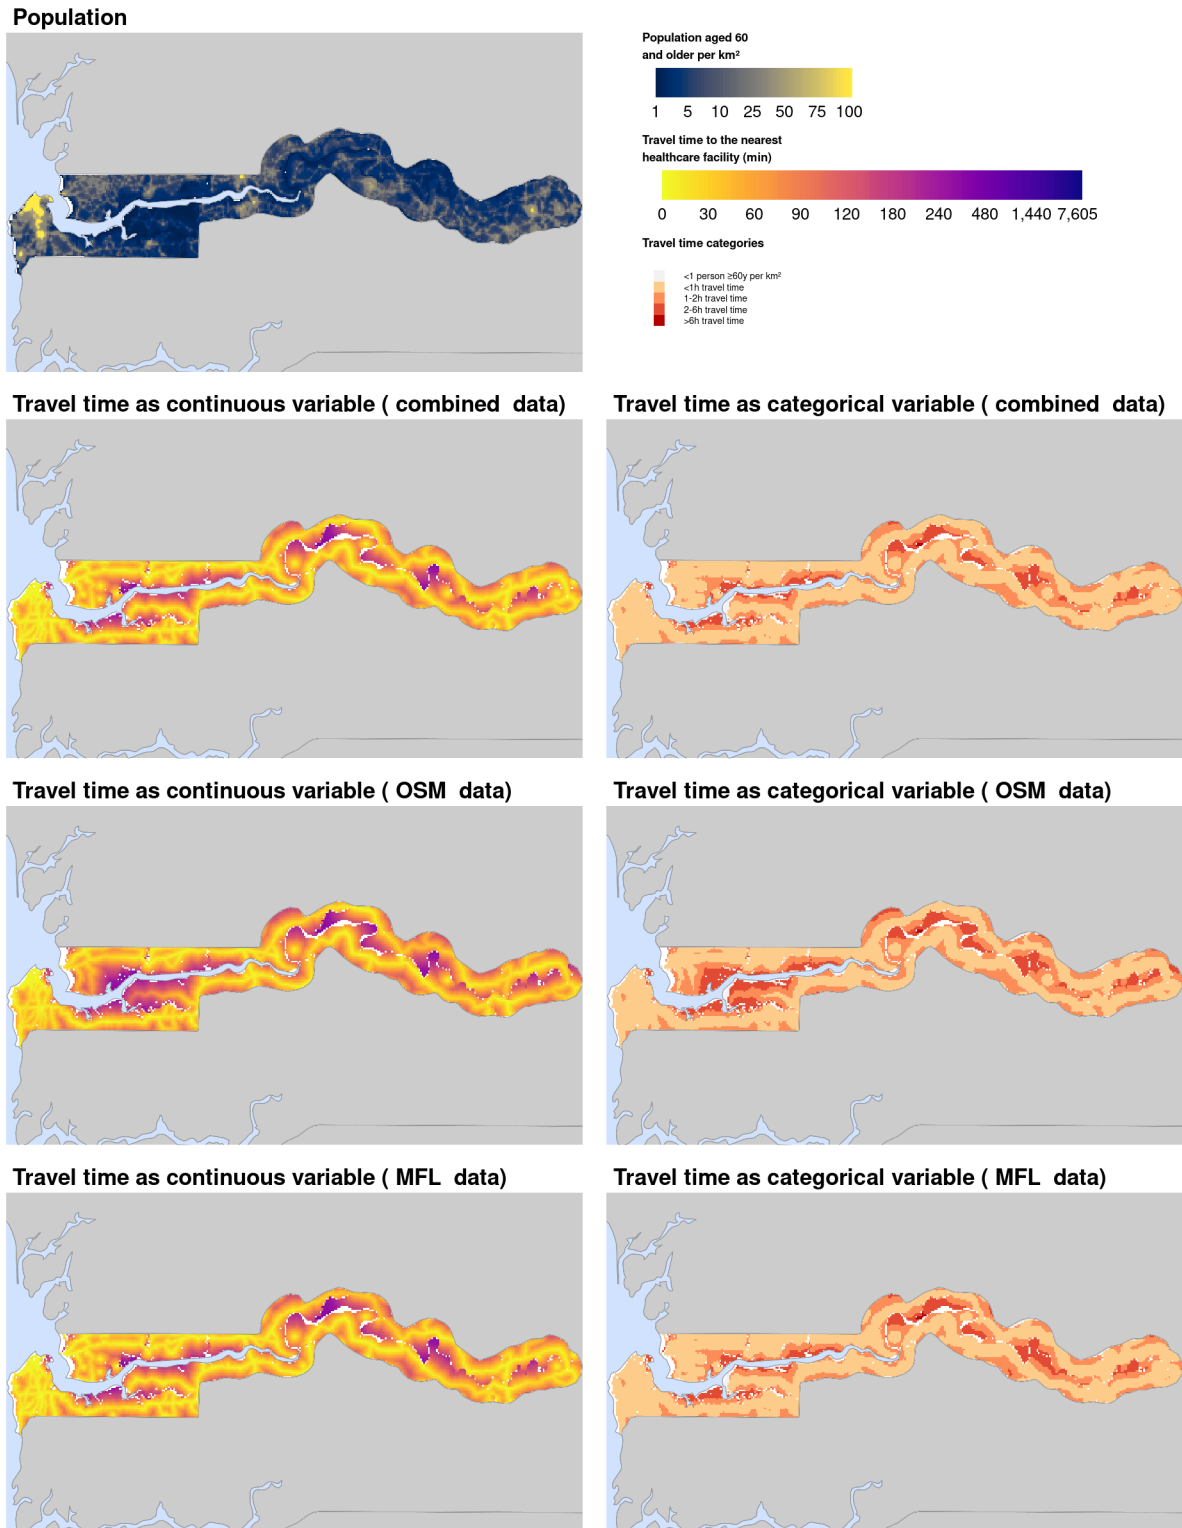

**Figure S93. Togo map of travel time to the nearest healthcare facility for adults aged  $\geq 60$  years**

**Population**

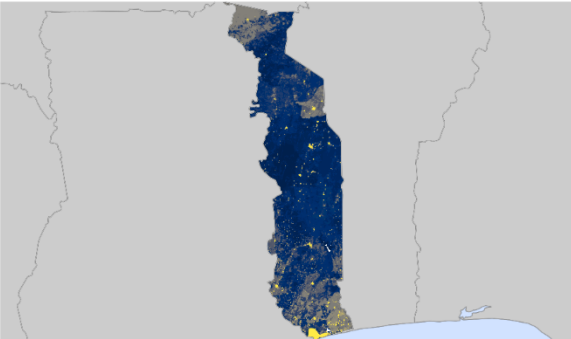

Population aged 60 and older per km<sup>2</sup>

1 5 10 25 50 75 100

Travel time to the nearest healthcare facility (min)

0 30 60 90 120 180 240 480 1,440 7,605

Travel time categories

- <1 person ≥60y per km<sup>2</sup>
- <1h travel time
- 1-2h travel time
- 2-6h travel time
- >6h travel time

**Travel time as continuous variable ( combined data)**

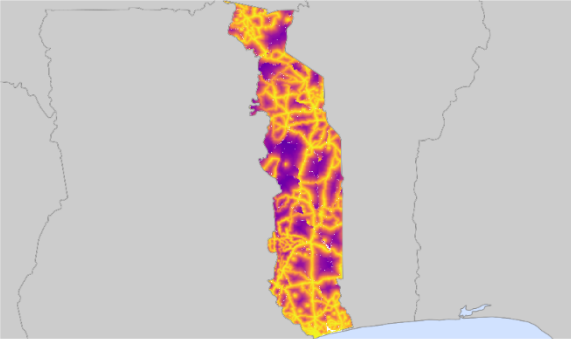

**Travel time as categorical variable ( combined data)**

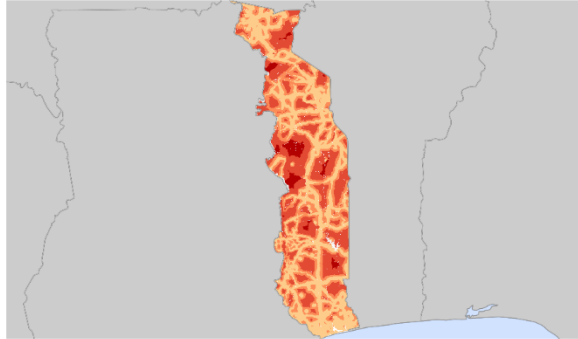

**Travel time as continuous variable ( OSM data)**

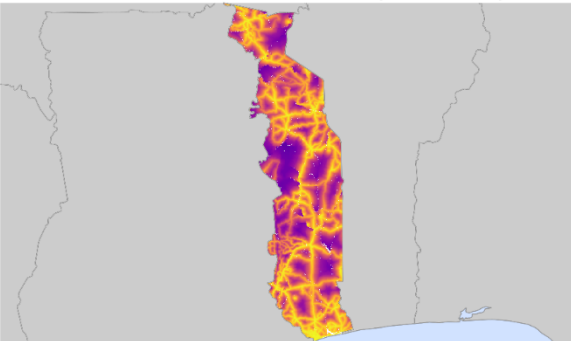

**Travel time as categorical variable ( OSM data)**

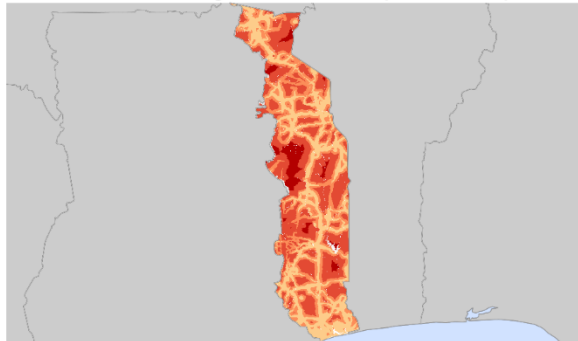

**Travel time as continuous variable ( MFL data)**

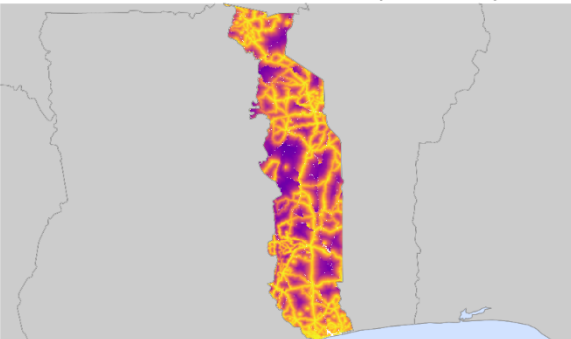

**Travel time as categorical variable ( MFL data)**

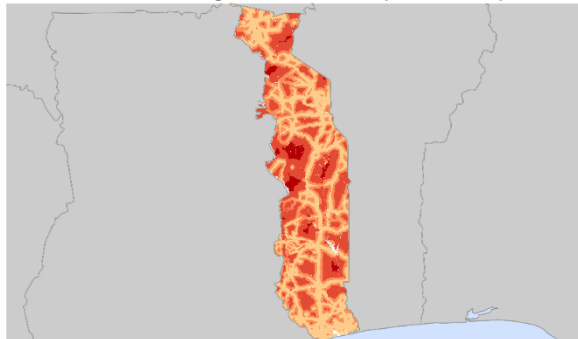

**Figure S94. Uganda map of travel time to the nearest healthcare facility for adults aged  $\geq 60$  years**

**Population**

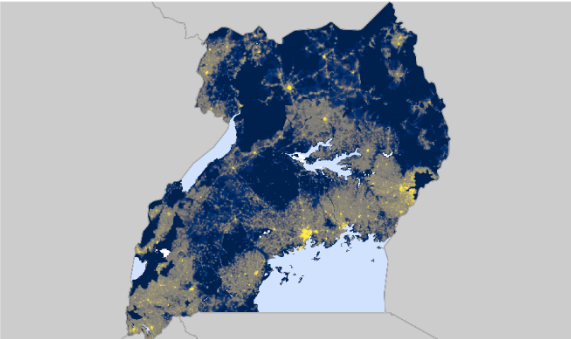

**Travel time as continuous variable ( combined data)**

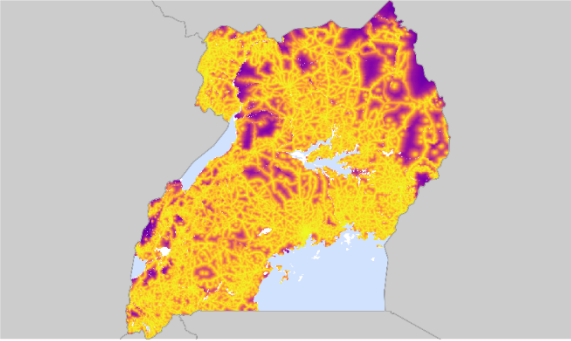

**Travel time as categorical variable ( combined data)**

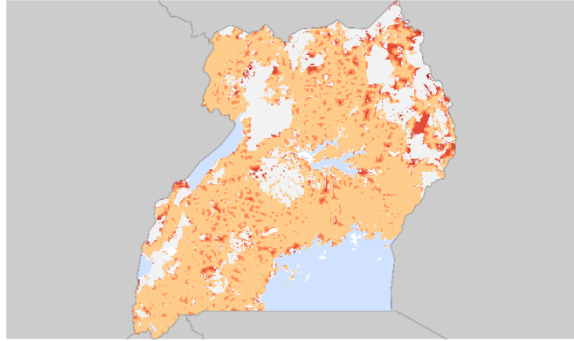

**Travel time as continuous variable ( OSM data)**

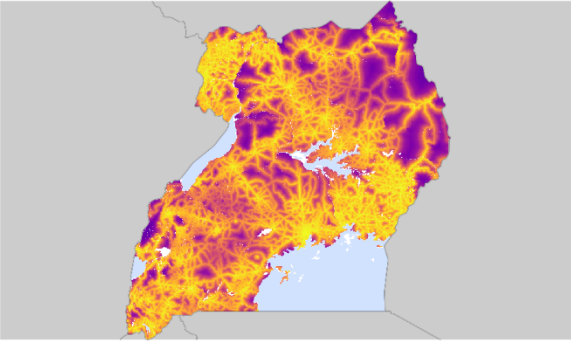

**Travel time as categorical variable ( OSM data)**

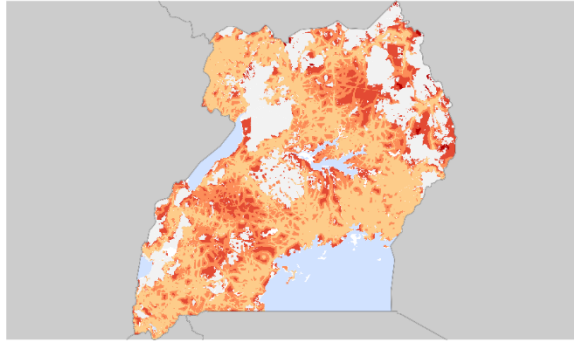

**Travel time as continuous variable ( MFL data)**

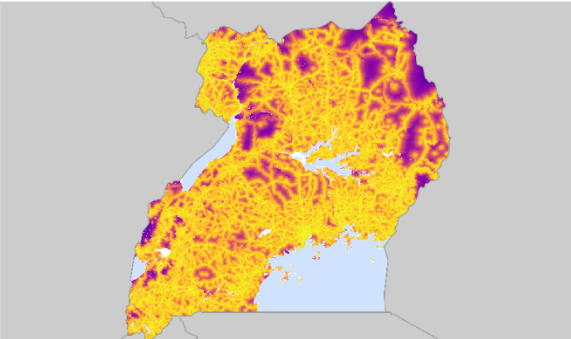

**Travel time as categorical variable ( MFL data)**

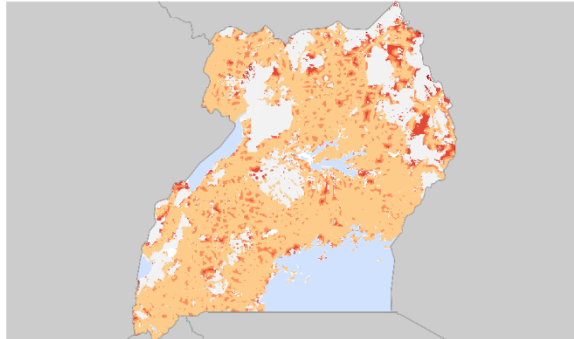

**Figure S95. Zambia map of travel time to the nearest healthcare facility for adults aged  $\geq 60$  years**

**Population**

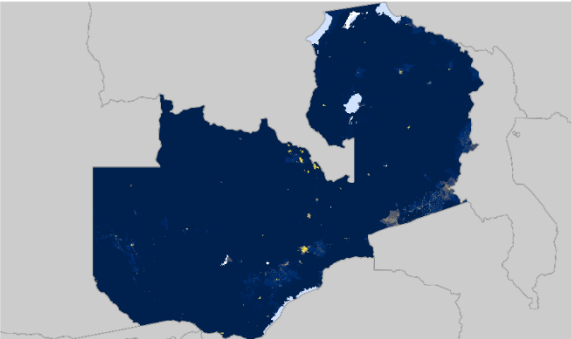

**Travel time as continuous variable ( combined data)**

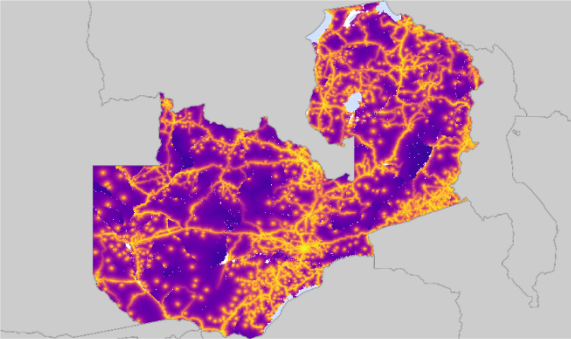

**Travel time as categorical variable ( combined data)**

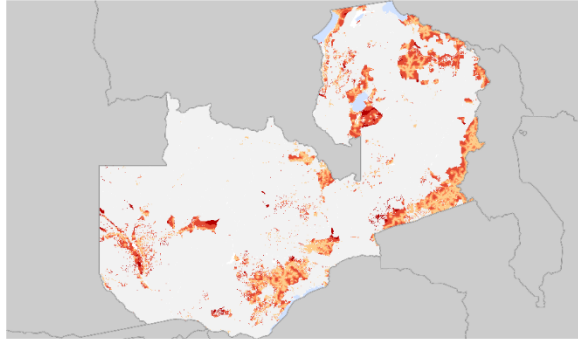

**Travel time as continuous variable ( OSM data)**

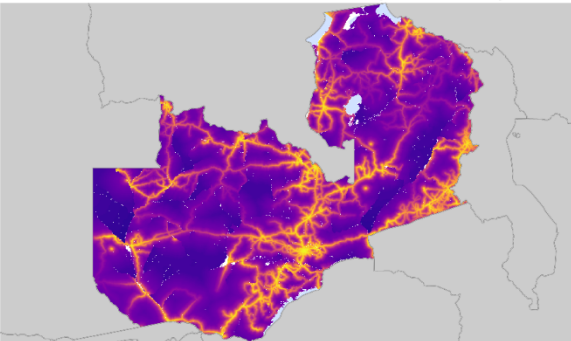

**Travel time as categorical variable ( OSM data)**

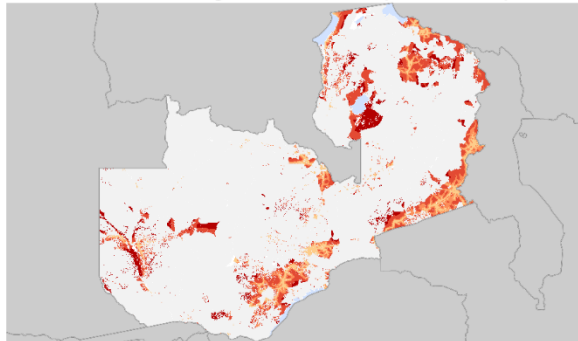

**Travel time as continuous variable ( MFL data)**

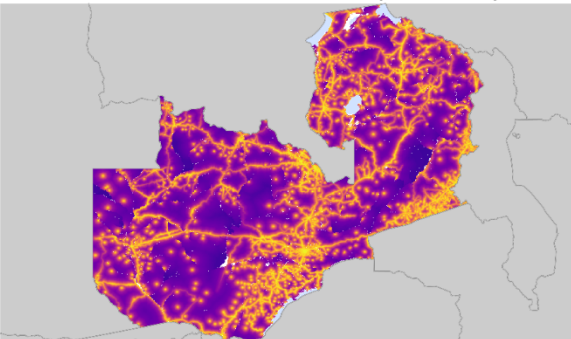

**Travel time as categorical variable ( MFL data)**

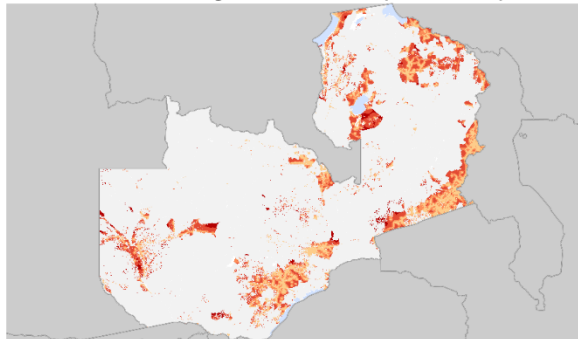



**Figure S96. Zimbabwe map of travel time to the nearest healthcare facility for adults aged  $\geq 60$  years**

**Population**

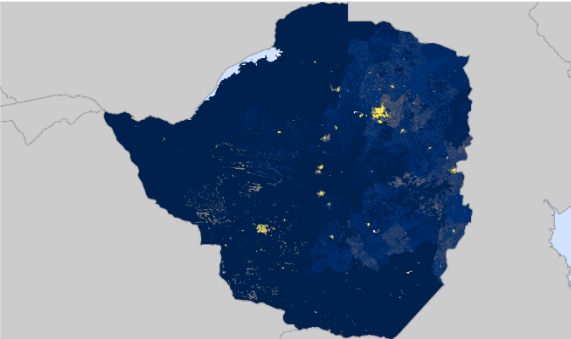

**Travel time as continuous variable ( combined data)**

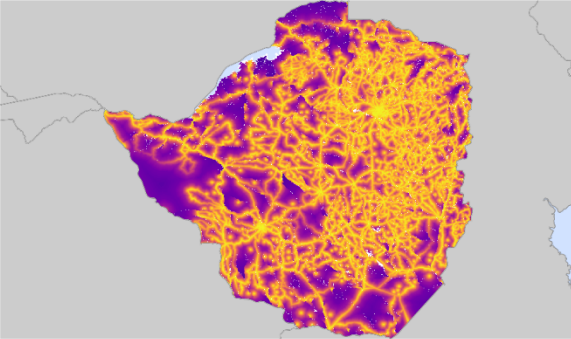

**Travel time as categorical variable ( combined data)**

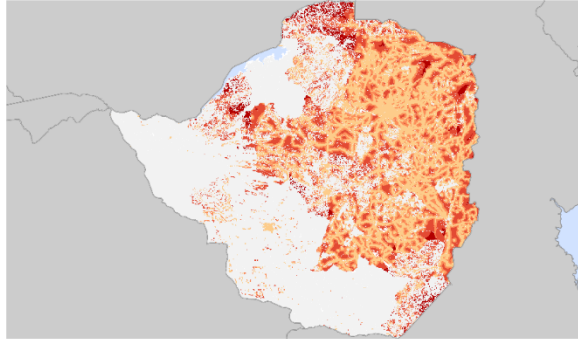

**Travel time as continuous variable ( OSM data)**

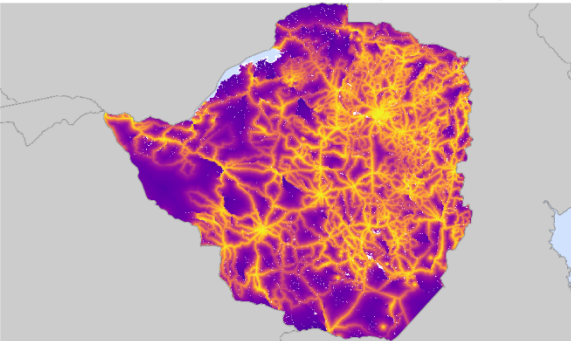

**Travel time as categorical variable ( OSM data)**

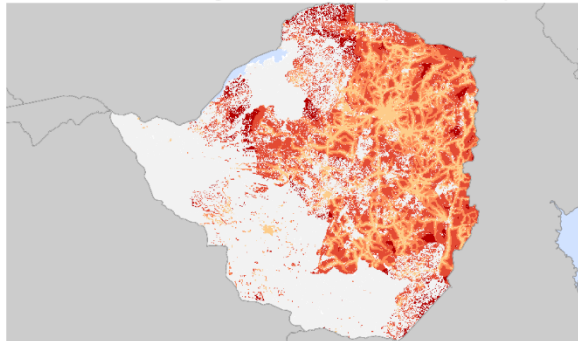

**Travel time as continuous variable ( MFL data)**

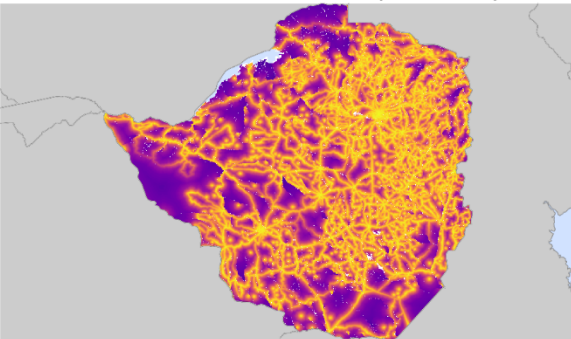

**Travel time as categorical variable ( MFL data)**

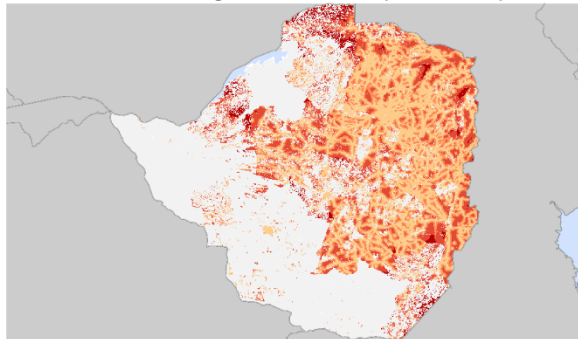

**Figure S97. Maps of travel time to the nearest healthcare facility for adults  $\geq 60$  years, by region based on the MFL dataset**

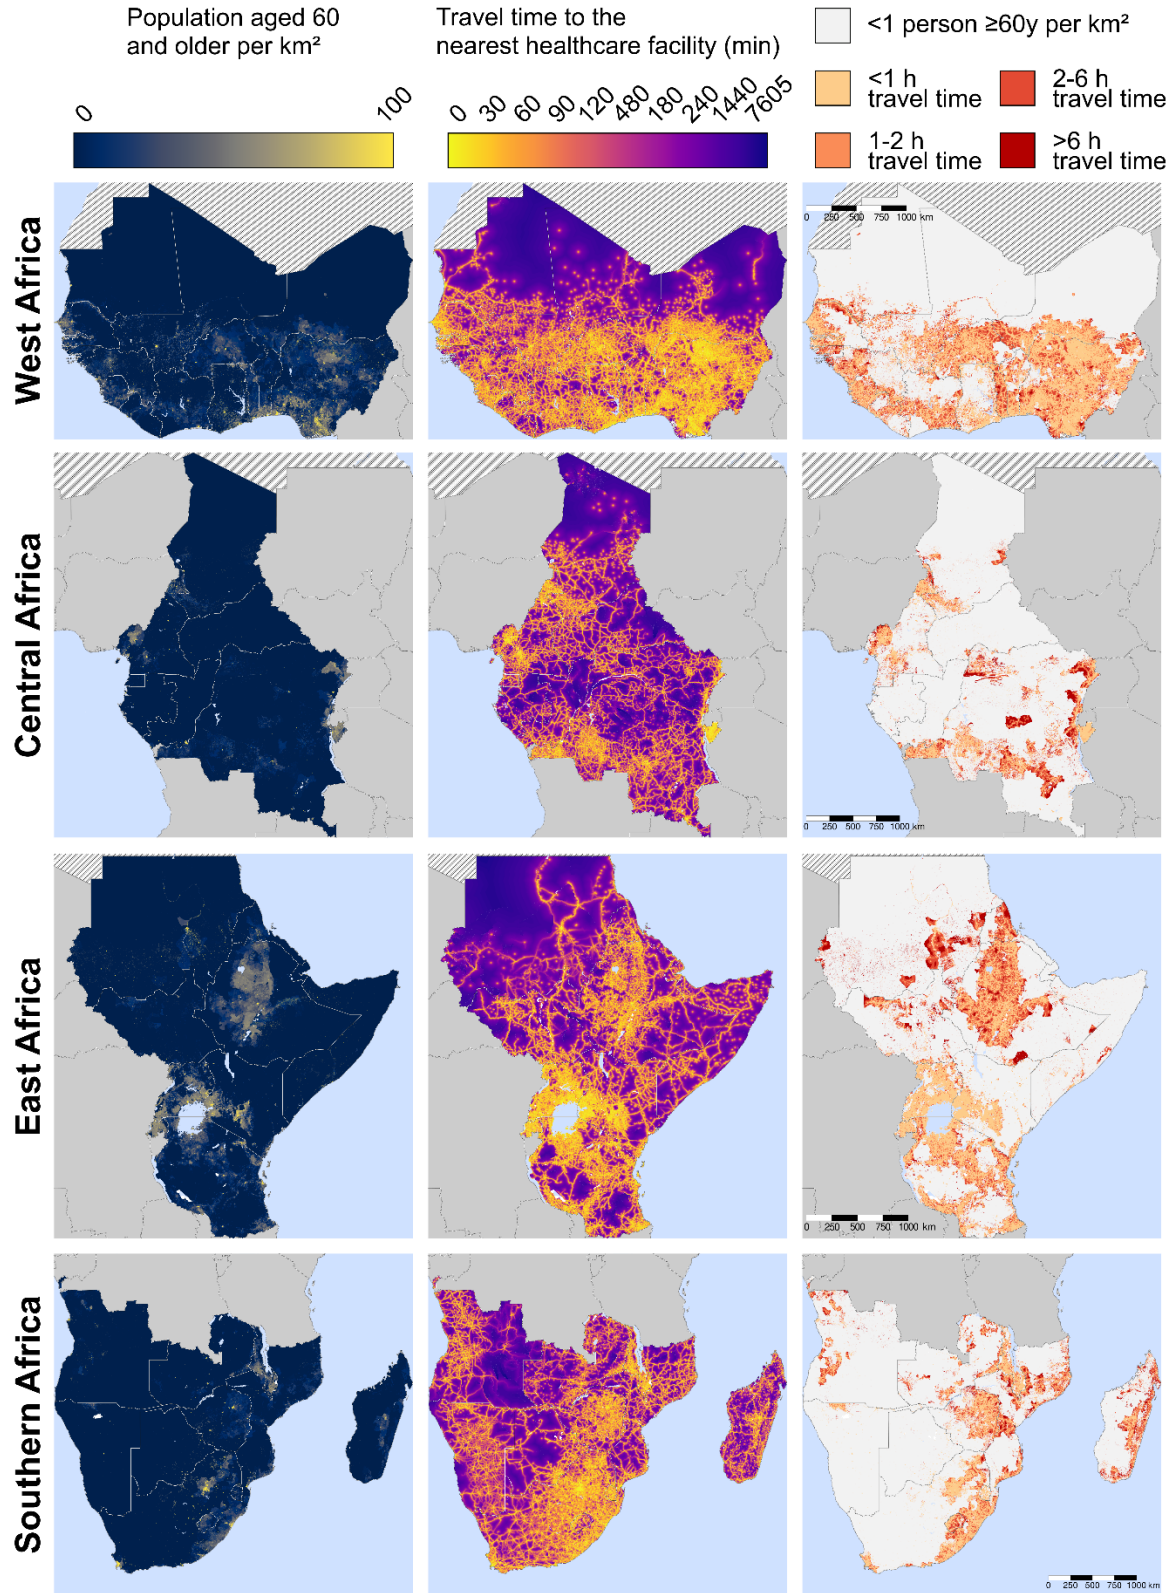

**Figure S98. Maps of travel time to the nearest healthcare facility for adults  $\geq 60$  years, by region based on the OSM dataset**

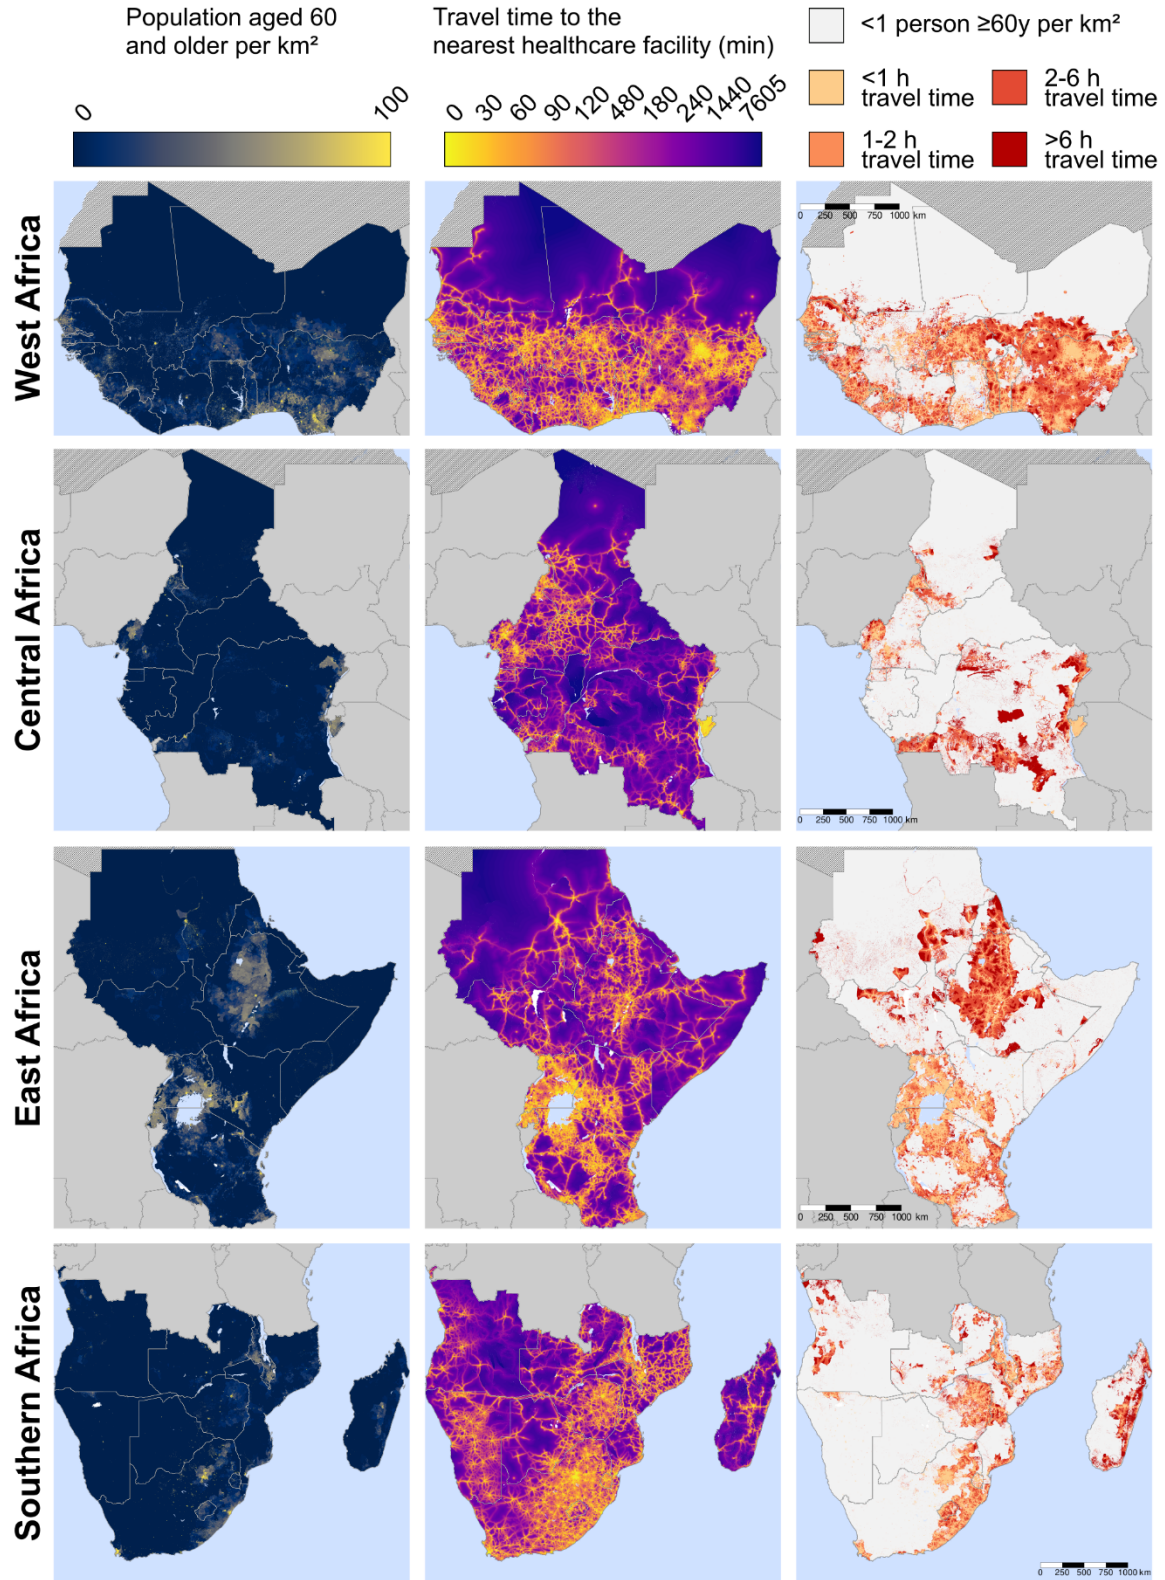

Figure S99. Location of healthcare facilities in OSM and MFL data for Angola

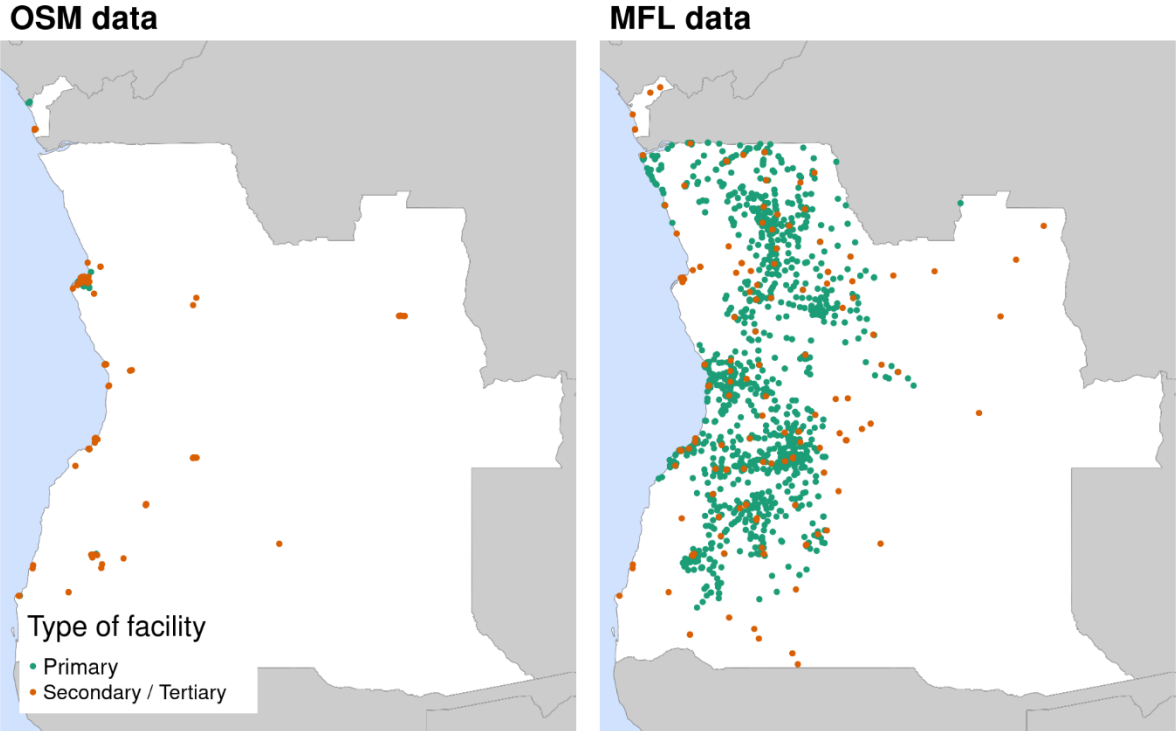

Figure S100. Location of healthcare facilities in OSM and MFL data for Benin

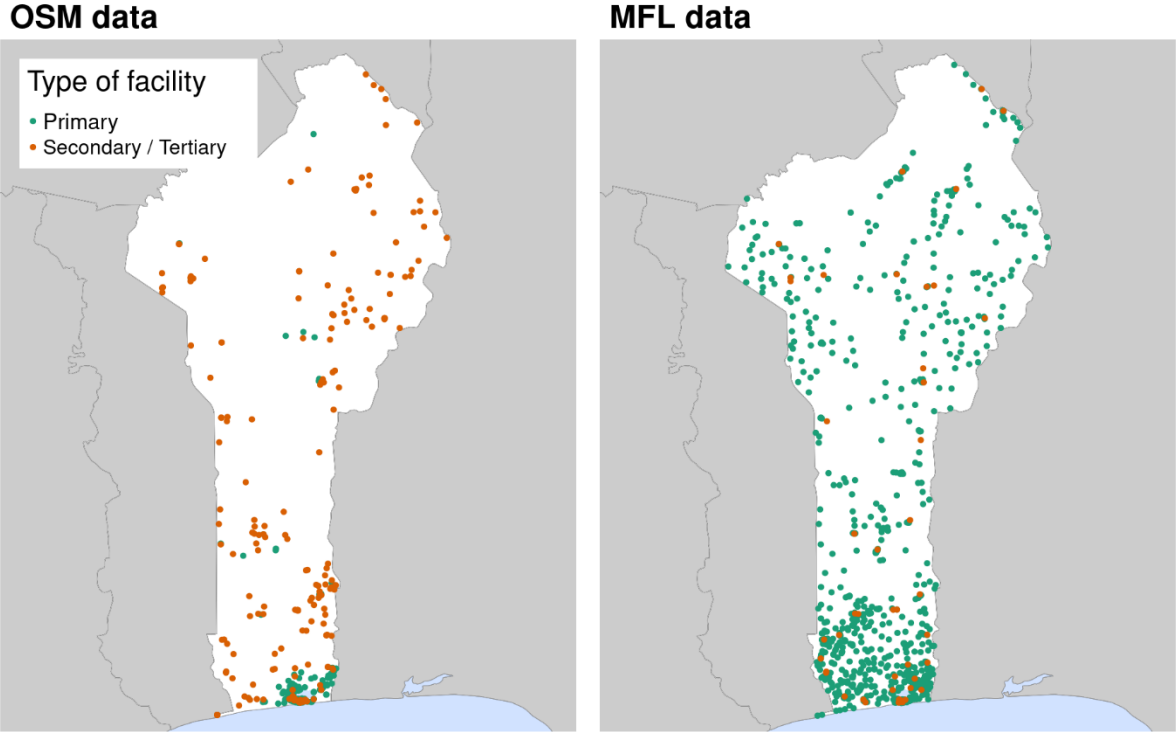

Figure S101. Location of healthcare facilities in OSM and MFL data for Botswana

OSM data

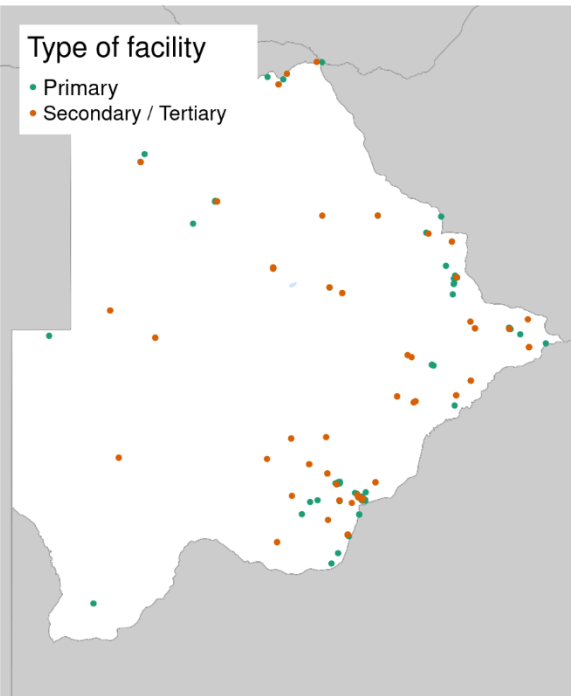

MFL data

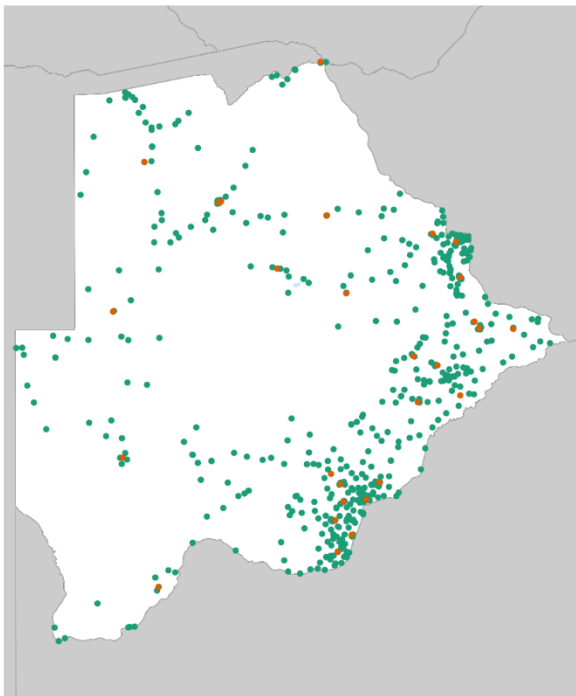

Figure S102. Location of healthcare facilities in OSM and MFL data for Burkina Faso

OSM data

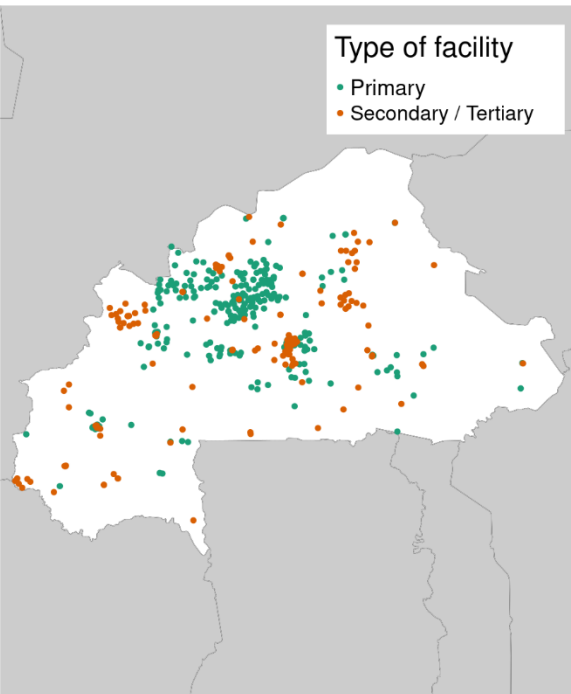

MFL data

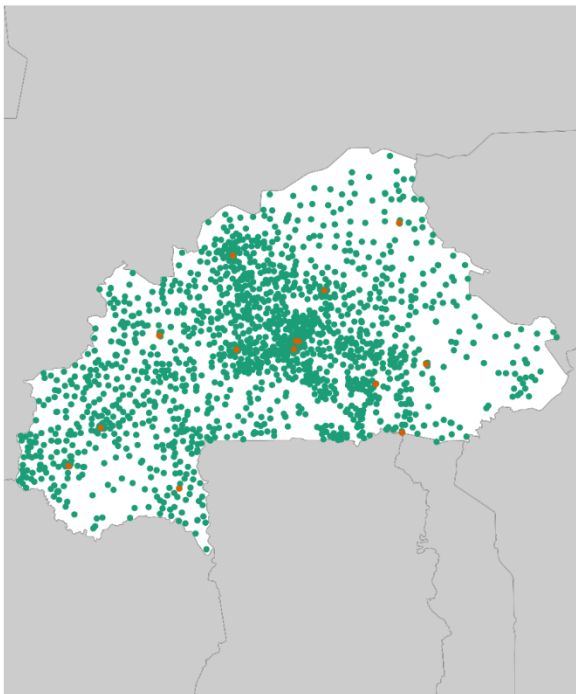

Figure S103. Location of healthcare facilities in OSM and MFL data for Burundi

OSM data

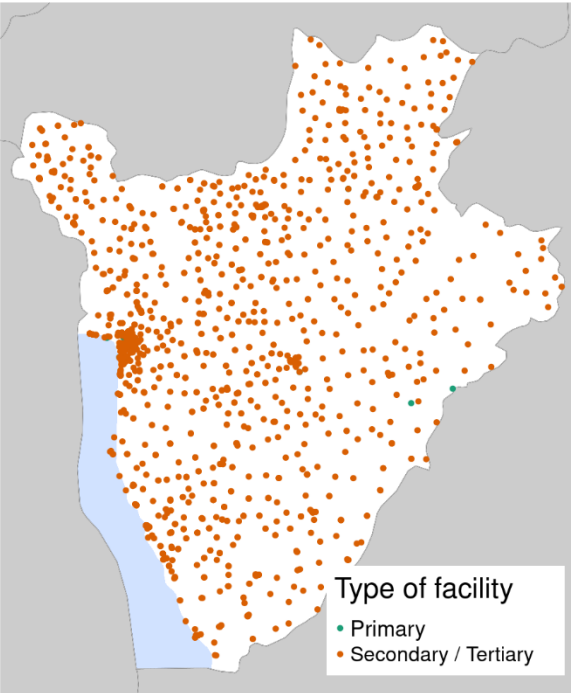

MFL data

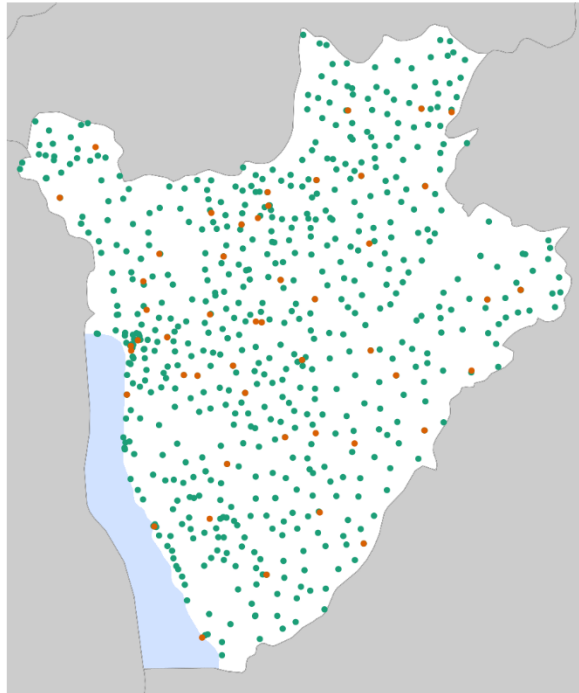

Figure S104. Location of healthcare facilities in OSM and MFL data for Cameroon

OSM data

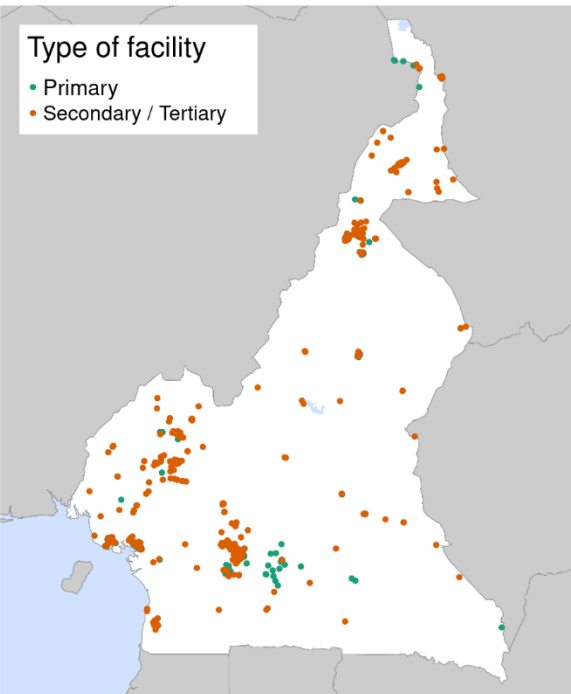

MFL data

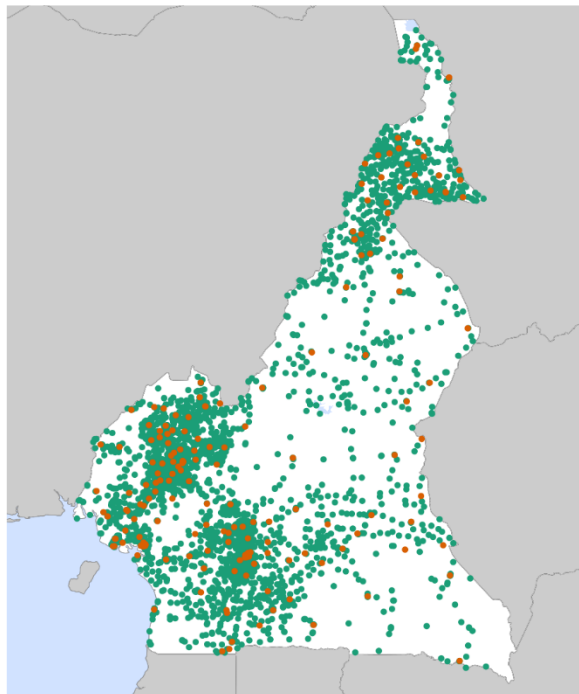

Figure S105. Location of healthcare facilities in OSM and MFL data for Central African Republic

OSM data

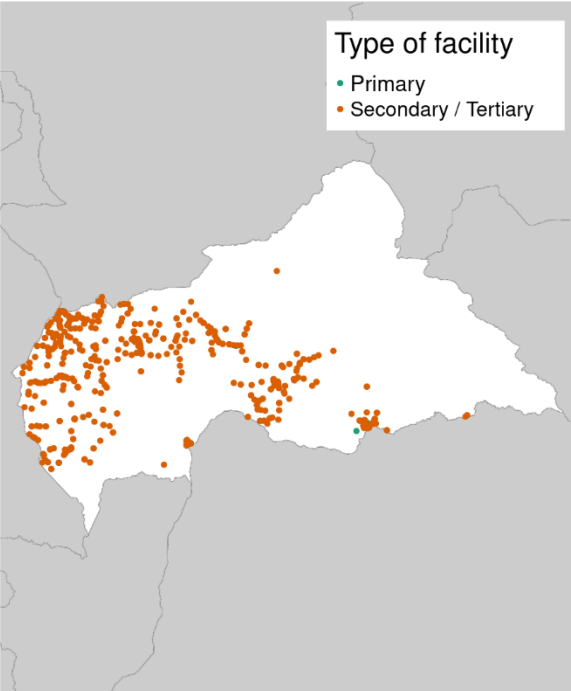

MFL data

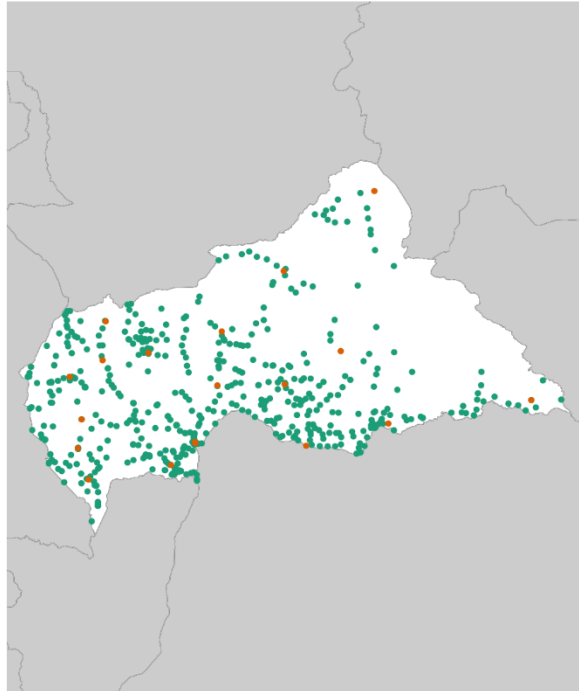

Figure S106. Location of healthcare facilities in OSM and MFL data for Chad

OSM data

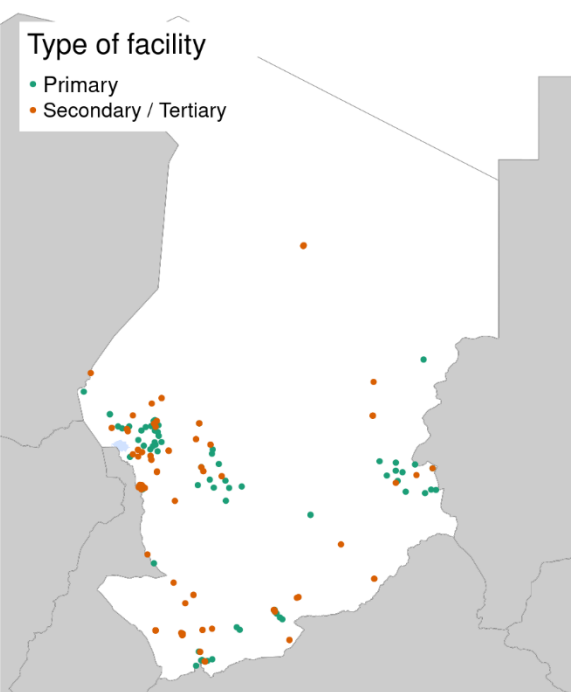

MFL data

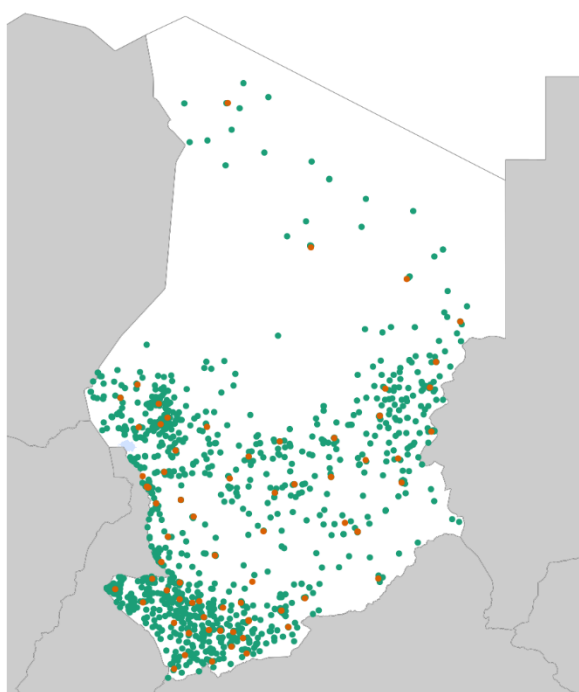

Figure S107. Location of healthcare facilities in OSM and MFL data for Djibouti

OSM data

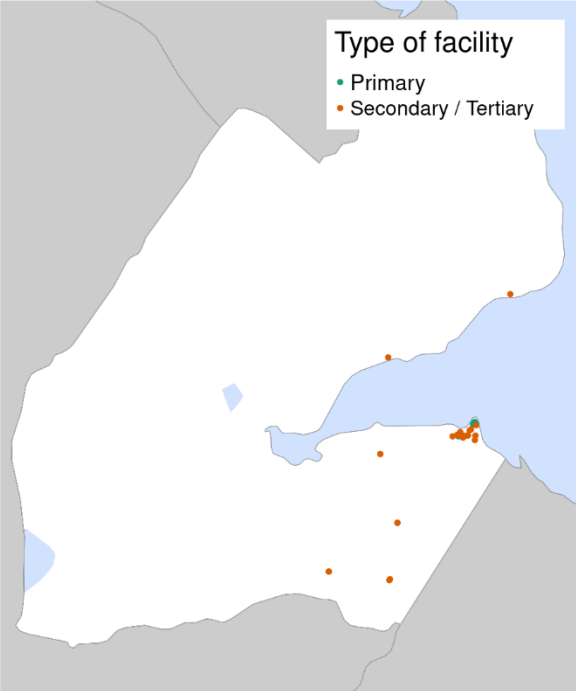

MFL data

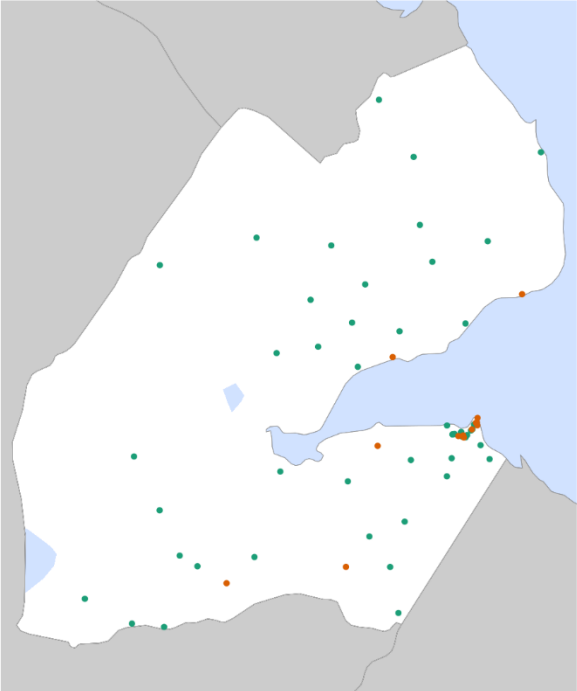

Figure S108. Location of healthcare facilities in OSM and MFL data for DRC

OSM data

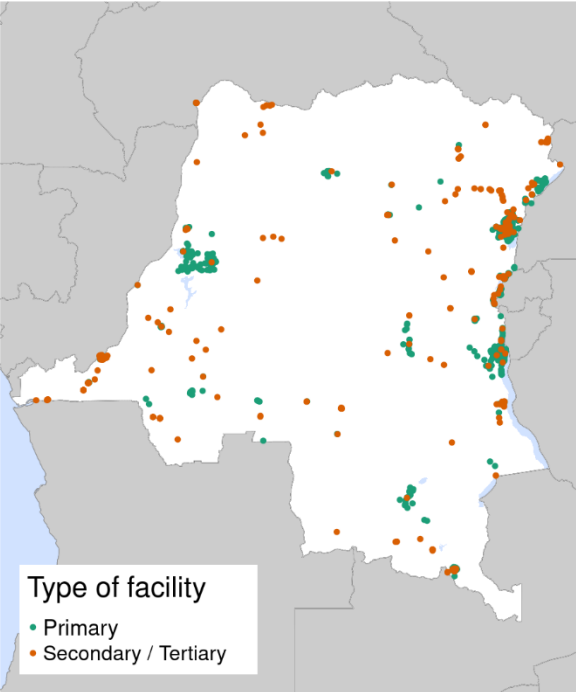

MFL data

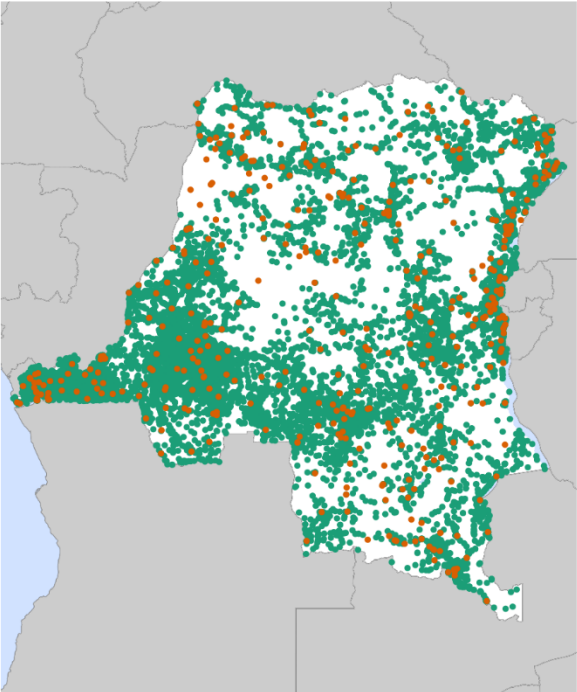



Figure S109. Location of healthcare facilities in OSM and MFL data for Equatorial Guinea

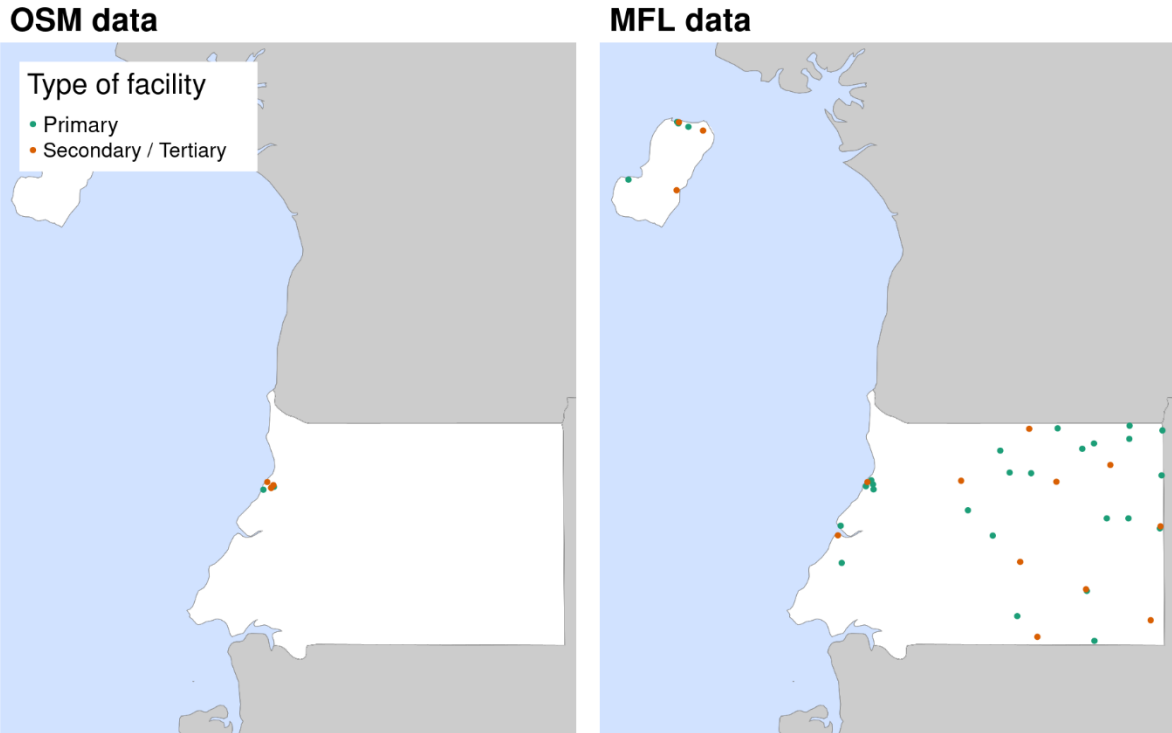

Figure S110. Location of healthcare facilities in OSM and MFL data for Eritrea

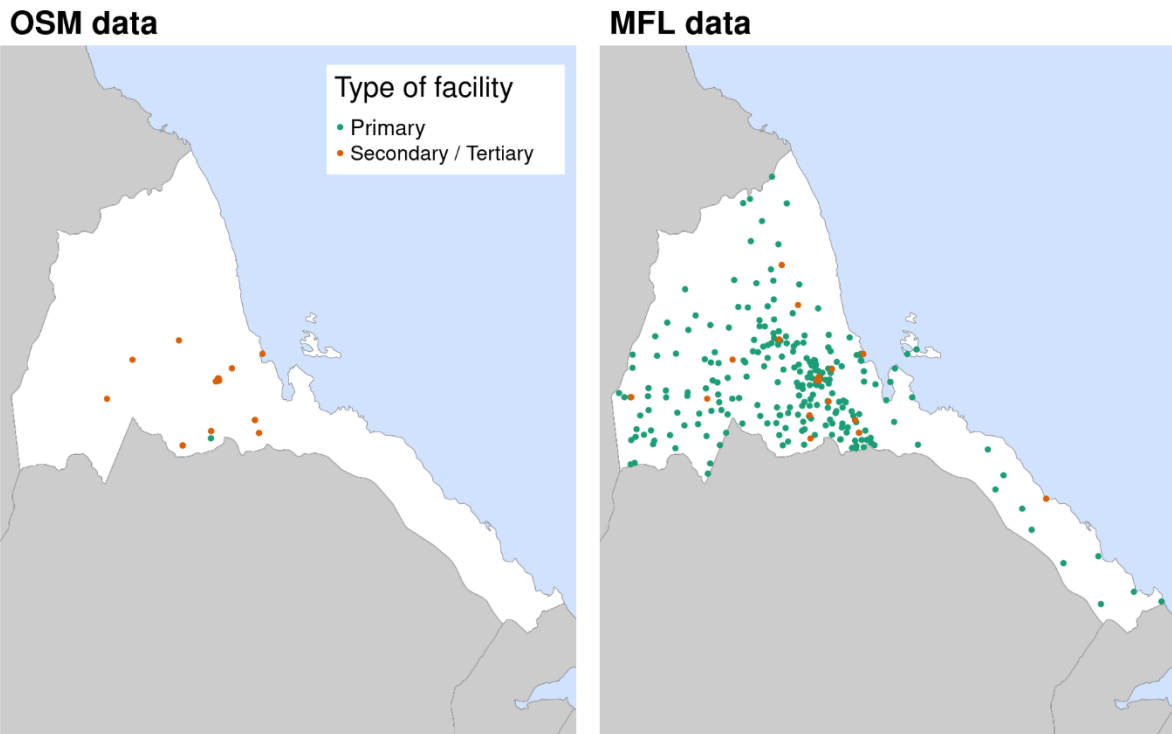

Figure S111. Location of healthcare facilities in OSM and MFL data for eSwatini

OSM data

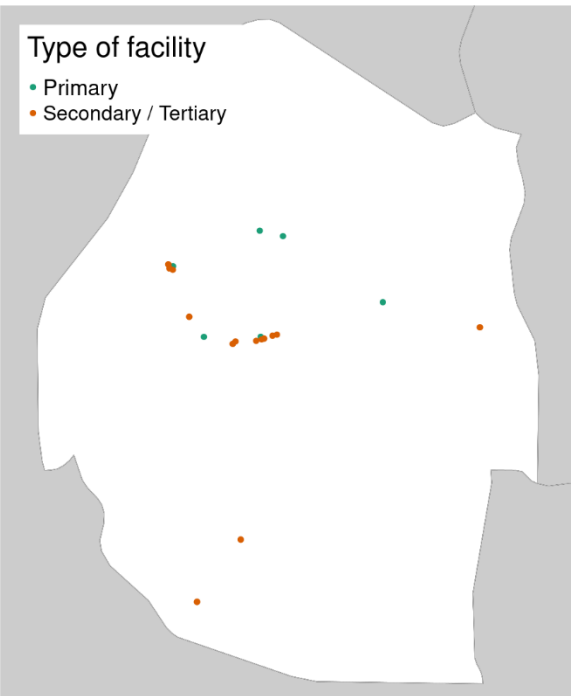

MFL data

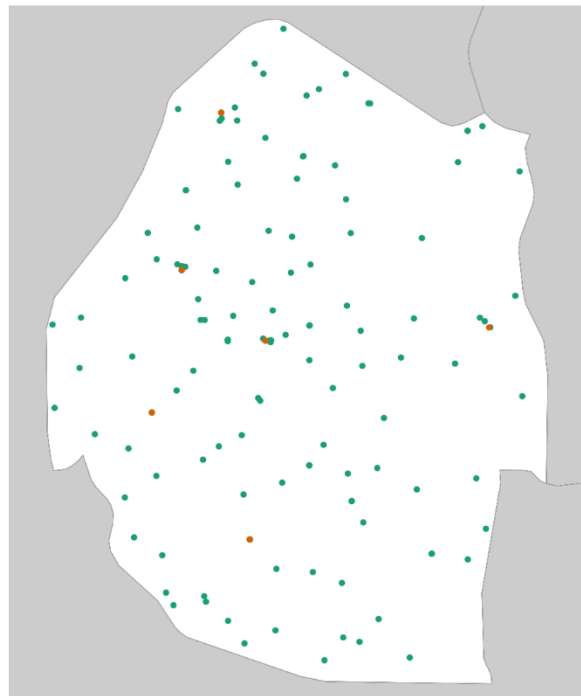

Figure S112. Location of healthcare facilities in OSM and MFL data for Ethiopia

OSM data

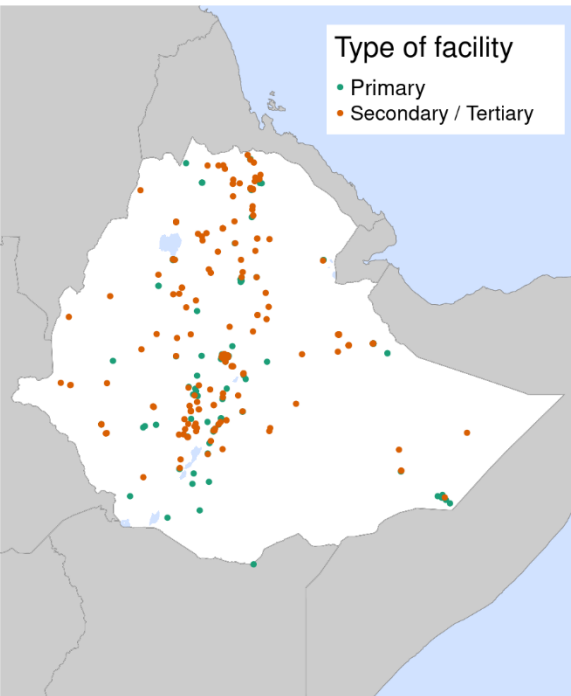

MFL data

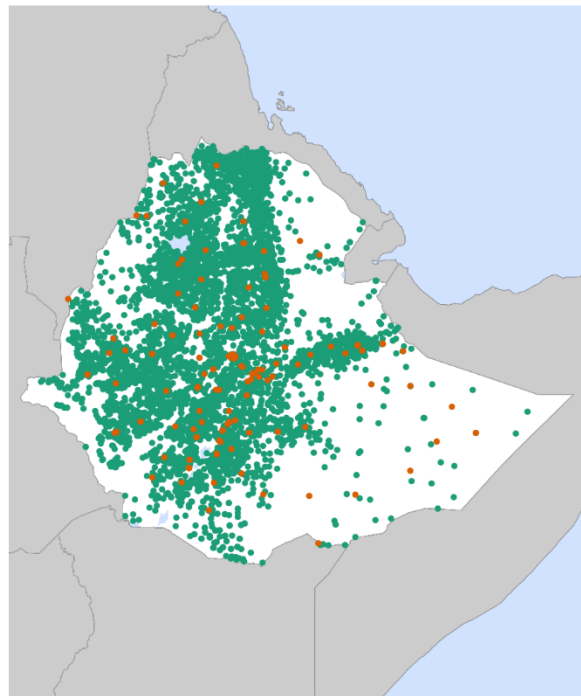

Figure S113. Location of healthcare facilities in OSM and MFL data for Gabon

OSM data

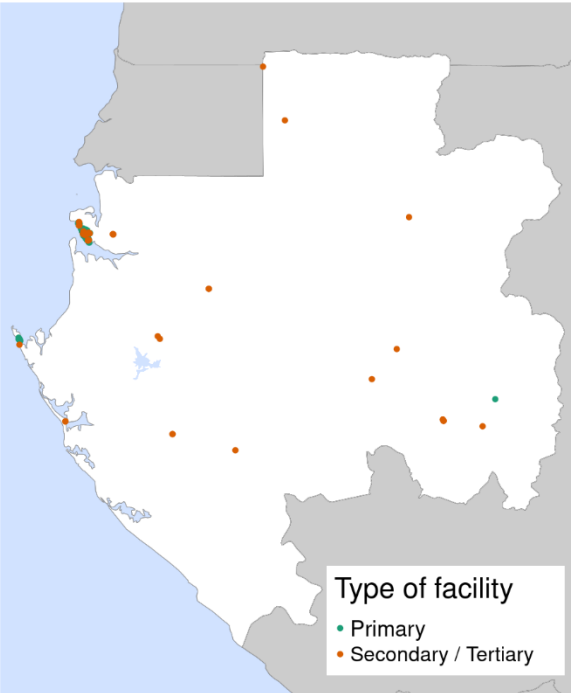

MFL data

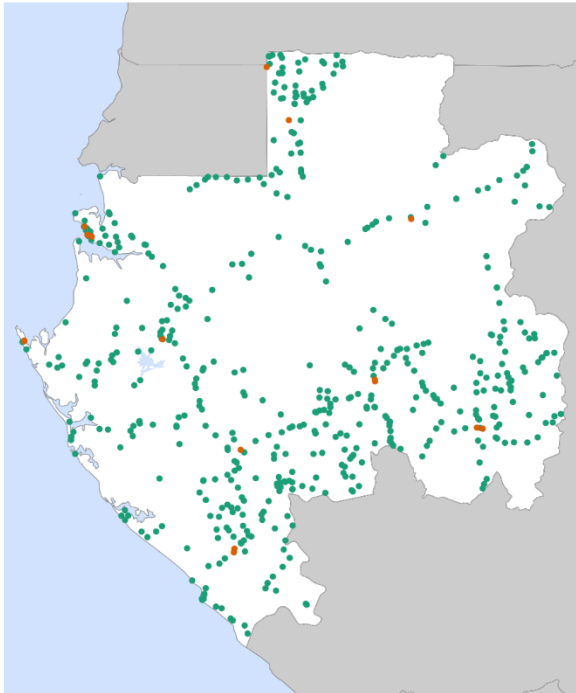

Figure S114. Location of healthcare facilities in OSM and MFL data for Ghana

OSM data

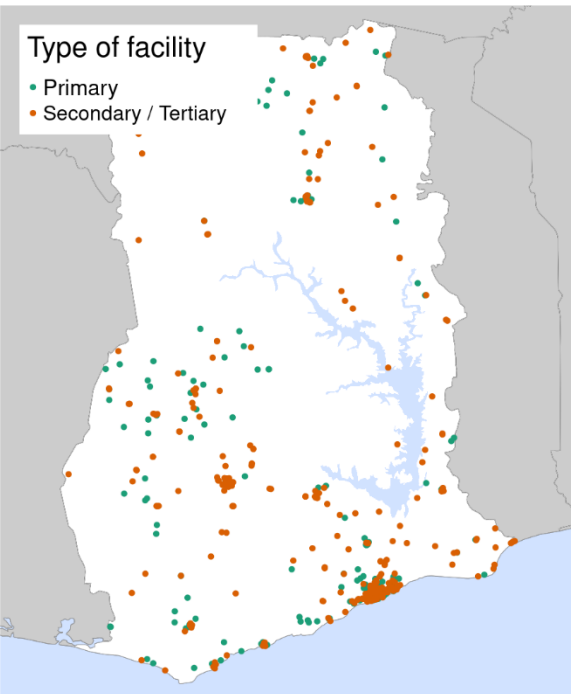

MFL data

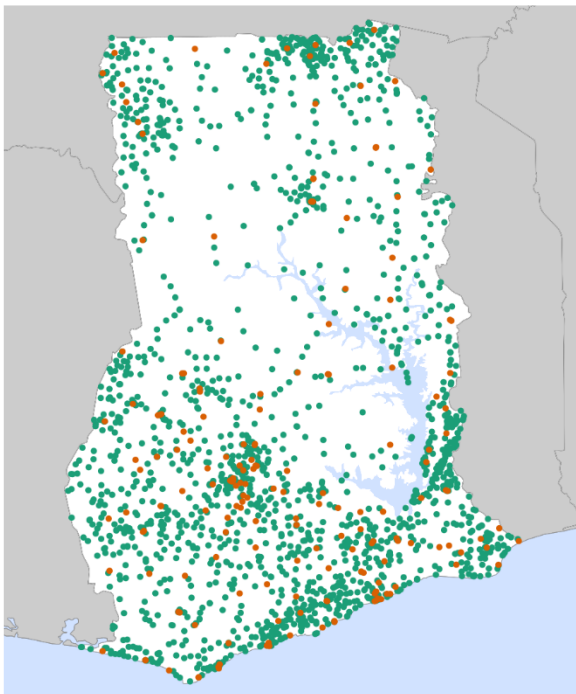

Figure S115. Location of healthcare facilities in OSM and MFL data for Guinea

OSM data

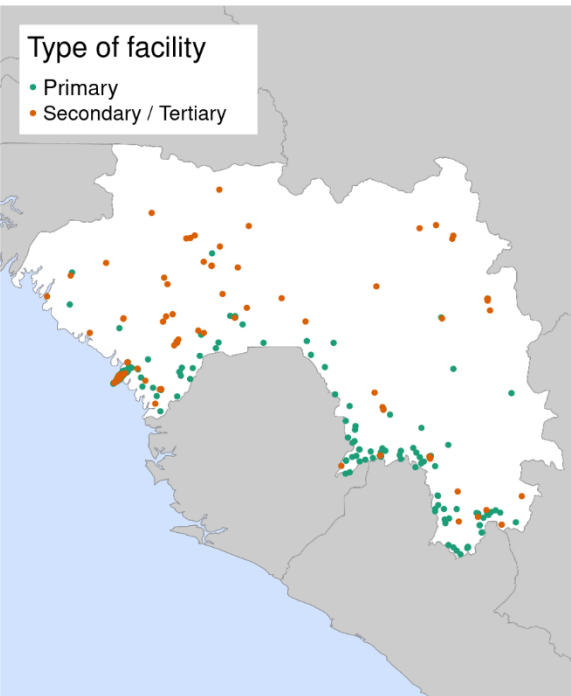

MFL data

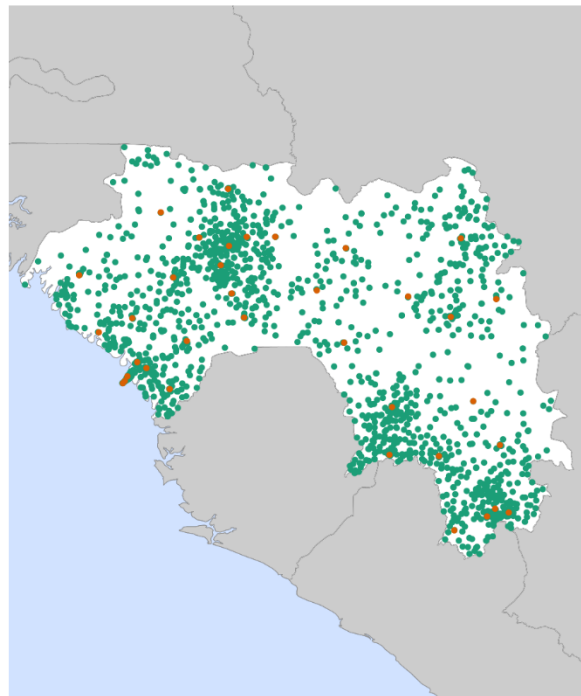

Figure S116. Location of healthcare facilities in OSM and MFL data for Guinea-Bissau

OSM data

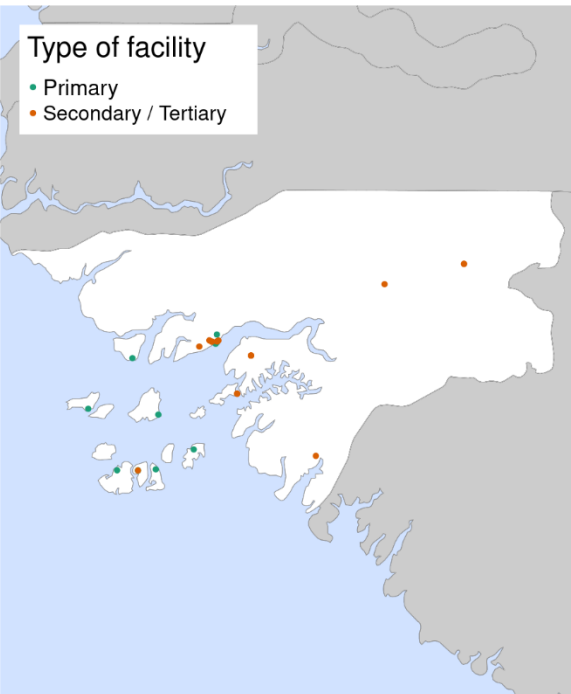

MFL data

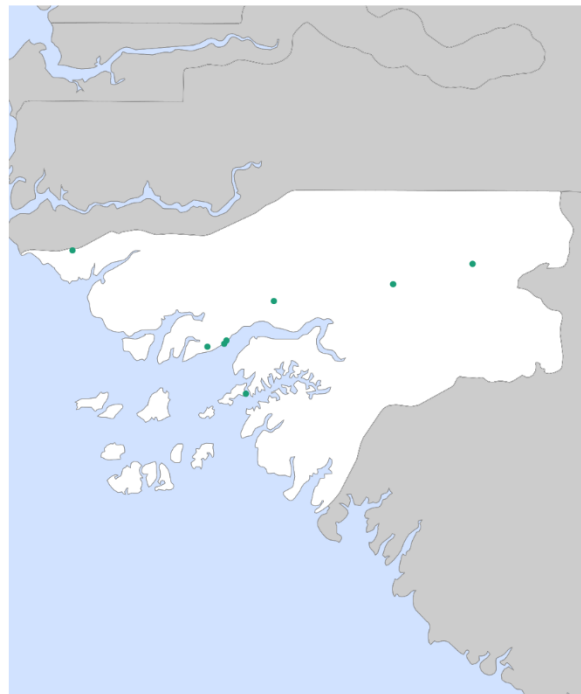

Figure S117. Location of healthcare facilities in OSM and MFL data for Ivory Coast

OSM data

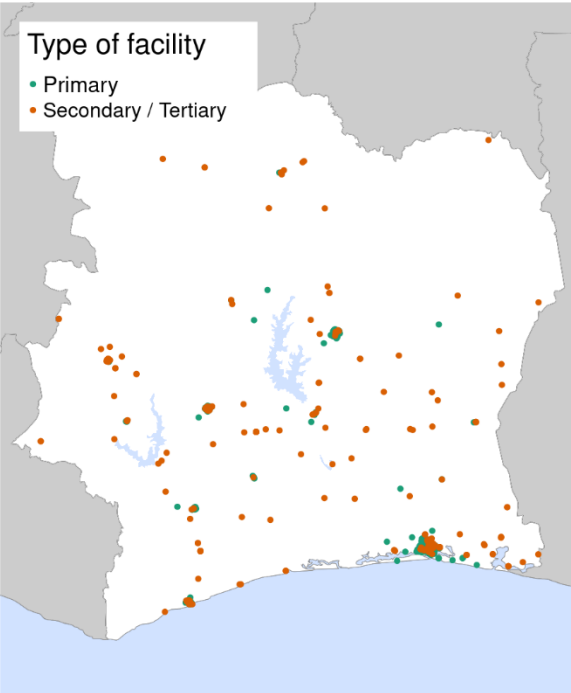

MFL data

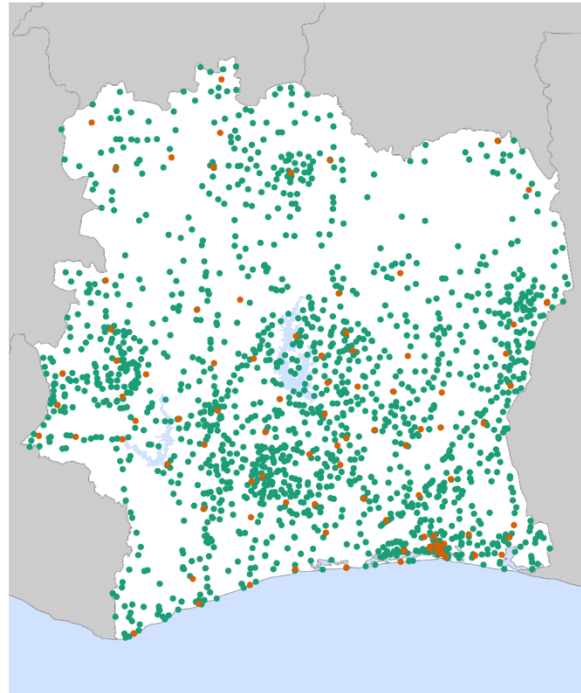

Figure S118. Location of healthcare facilities in OSM and MFL data for Kenya

OSM data

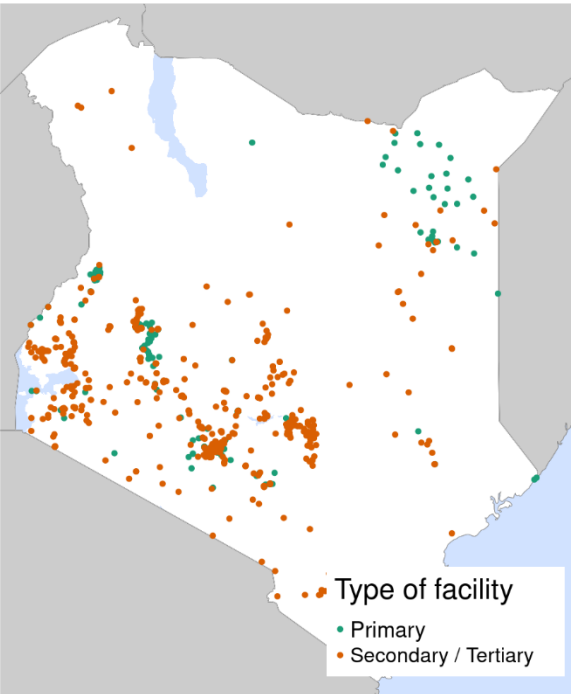

MFL data

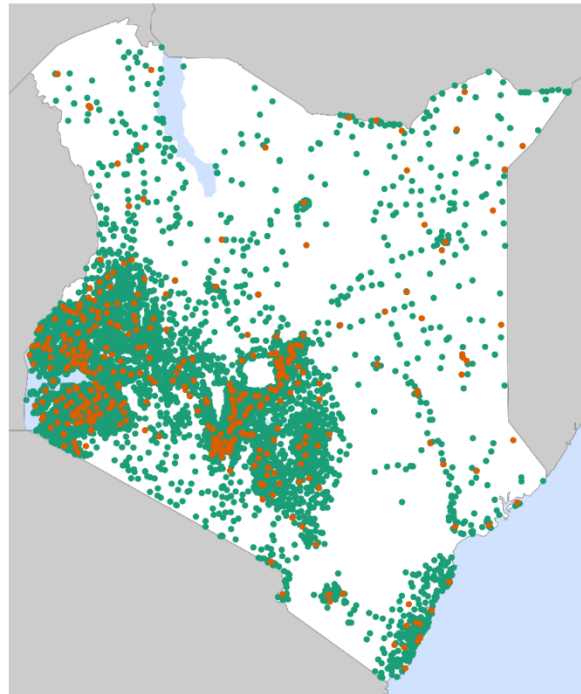

Figure S119. Location of healthcare facilities in OSM and MFL data for Lesotho

OSM data

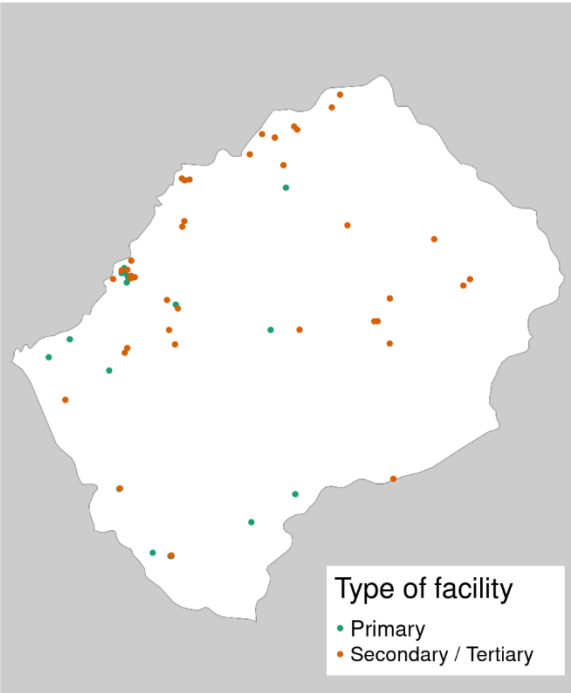

MFL data

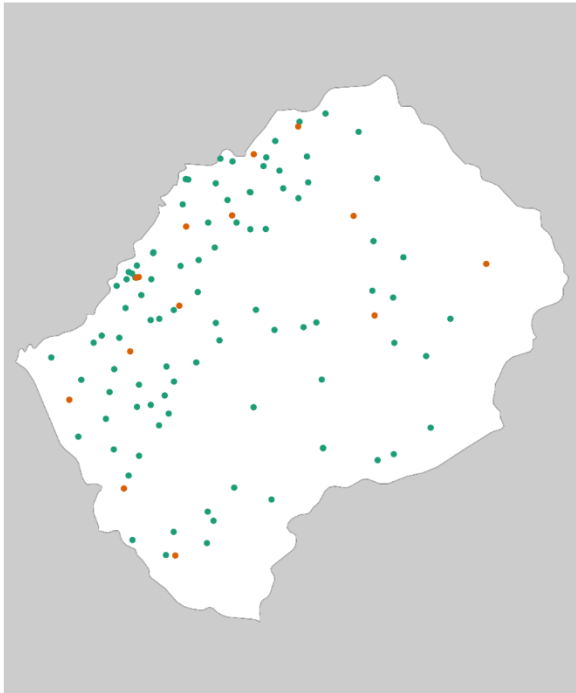

Figure S120. Location of healthcare facilities in OSM and MFL data for Liberia

OSM data

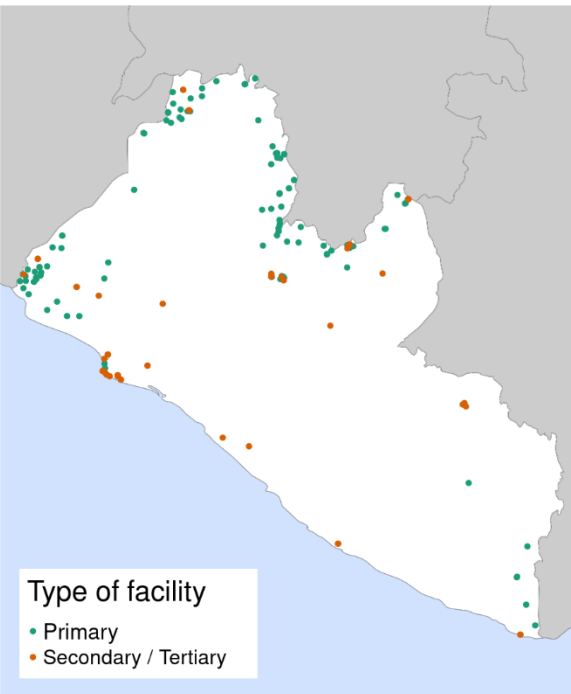

MFL data

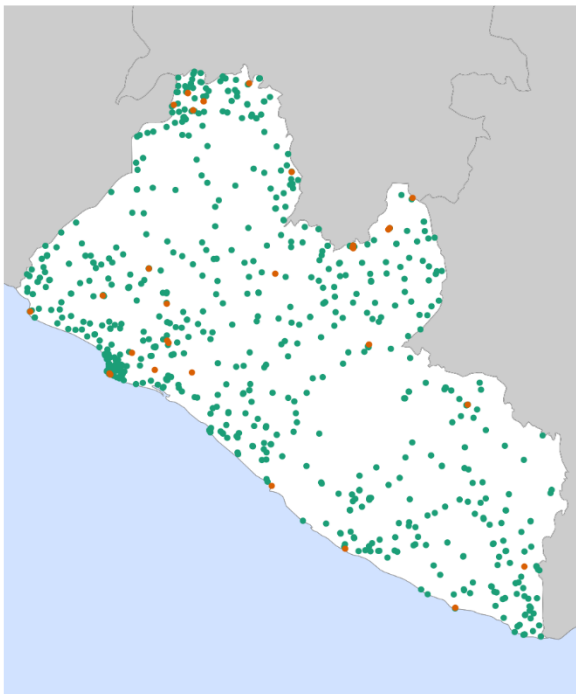

Figure S121. Location of healthcare facilities in OSM and MFL data for Madagascar

OSM data

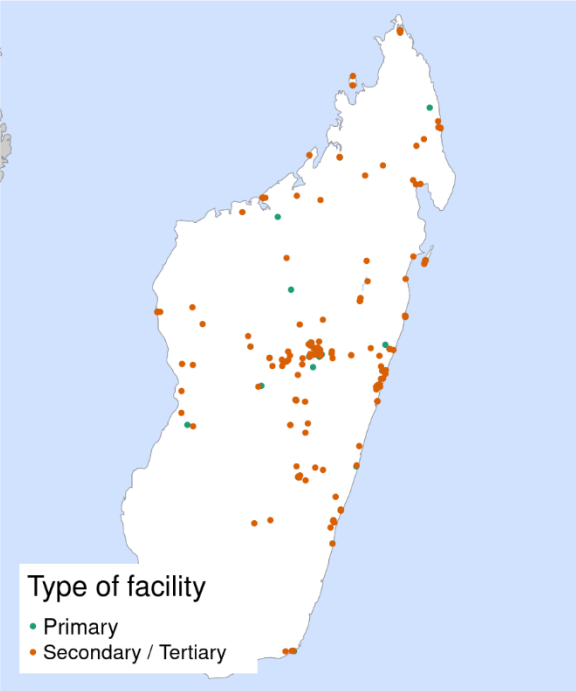

MFL data

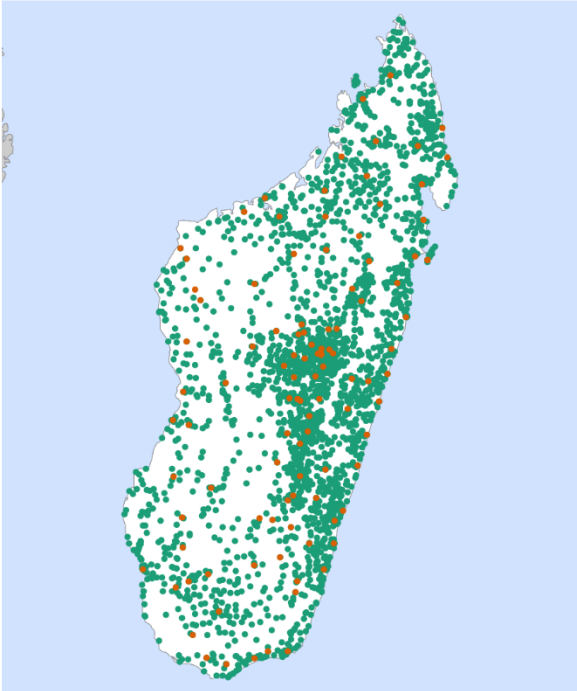

Figure S122. Location of healthcare facilities in OSM and MFL data for Malawi

OSM data

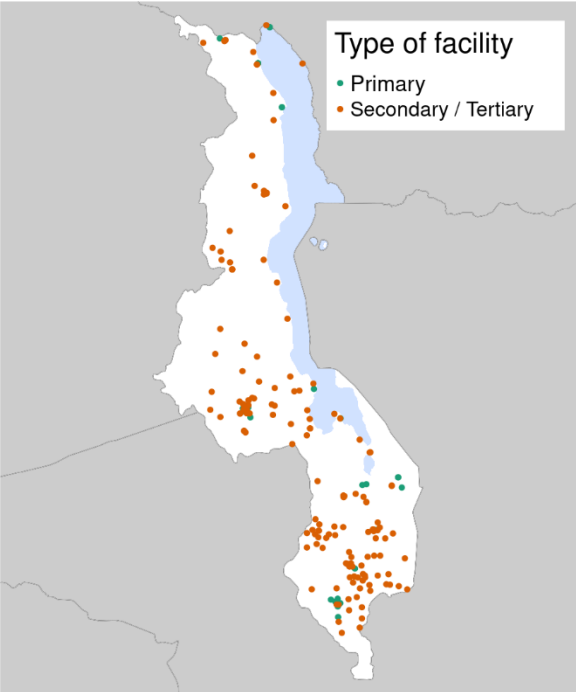

MFL data

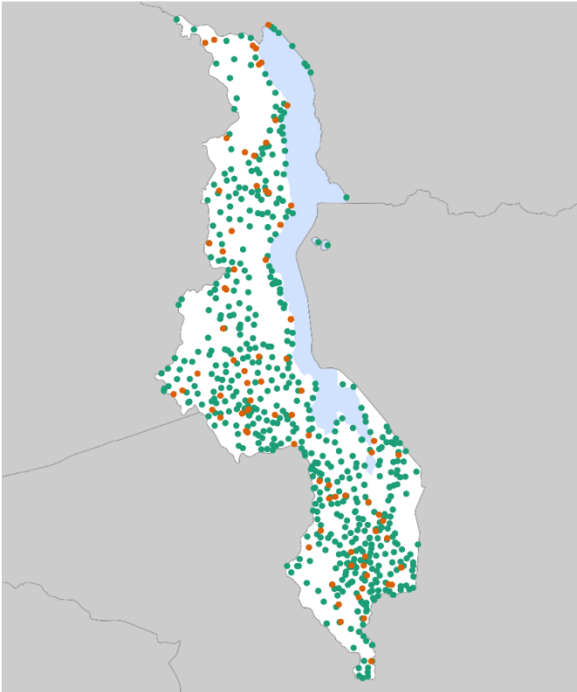

Figure S123. Location of healthcare facilities in OSM and MFL data for Mali

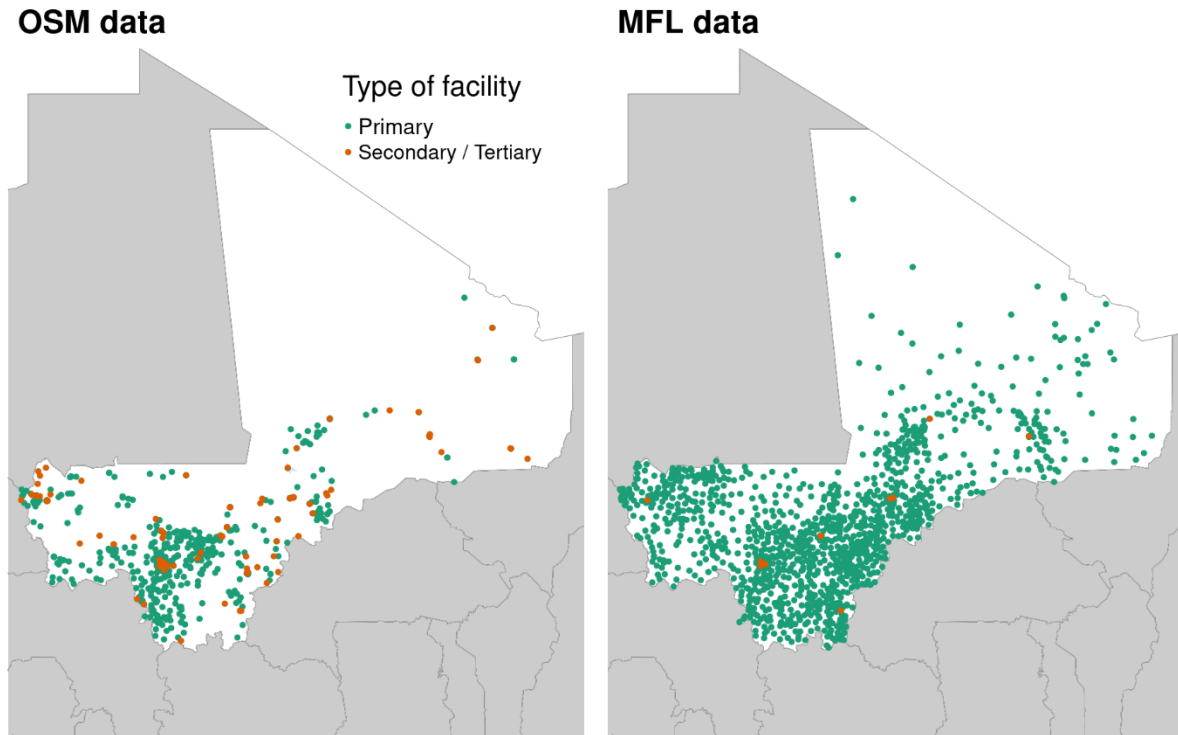

Figure S124. Location of healthcare facilities in OSM and MFL data for Mauritania

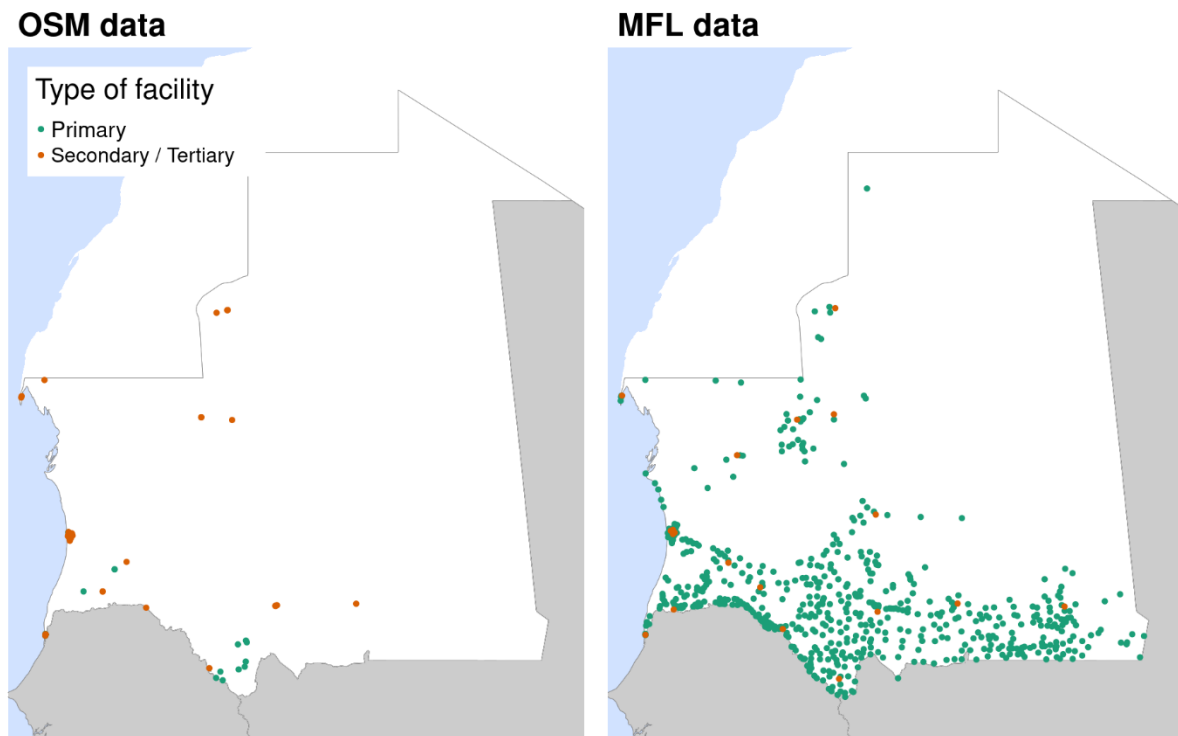



Figure S125. Location of healthcare facilities in OSM and MFL data for Mozambique

OSM data

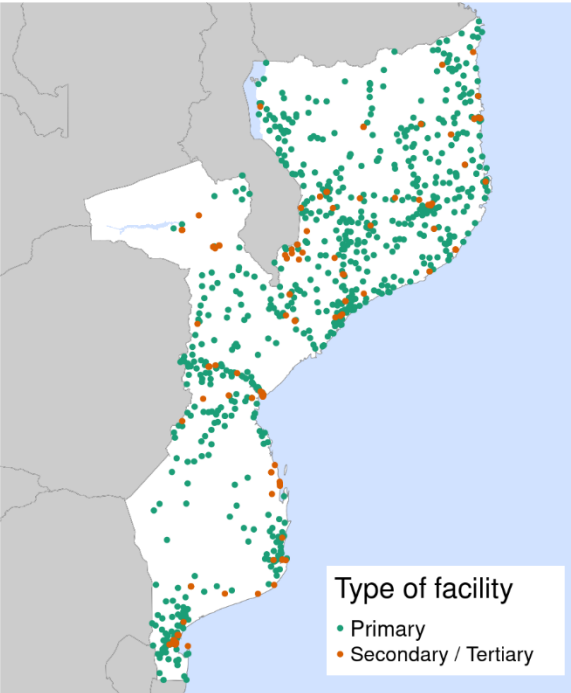

MFL data

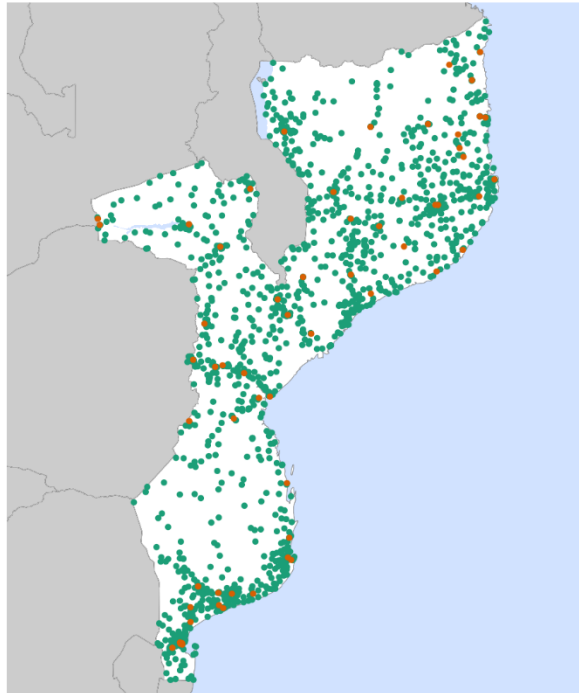

Figure S126. Location of healthcare facilities in OSM and MFL data for Namibia

OSM data

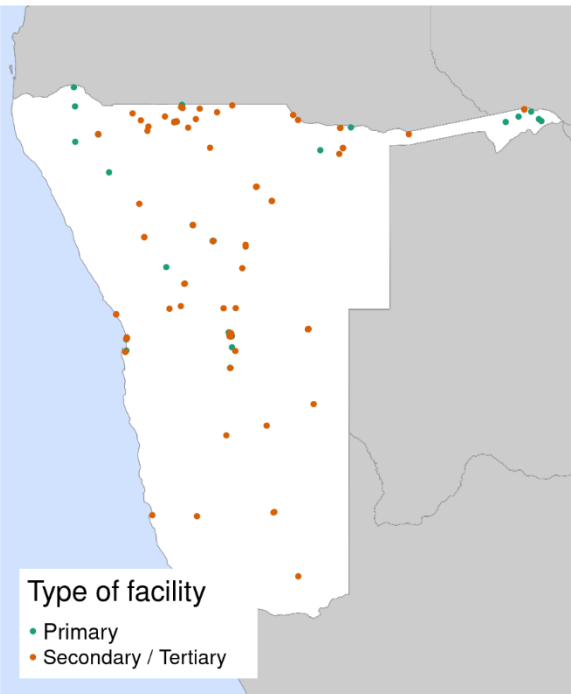

MFL data

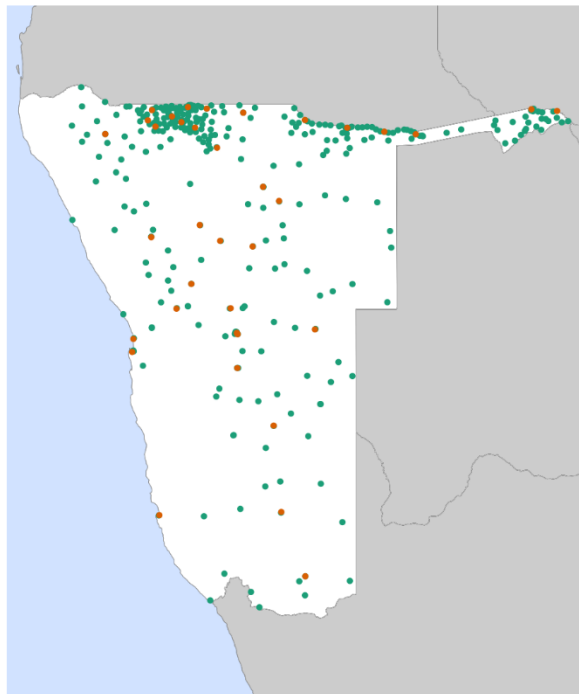

Figure S127. Location of healthcare facilities in OSM and MFL data for Niger

OSM data

MFL data

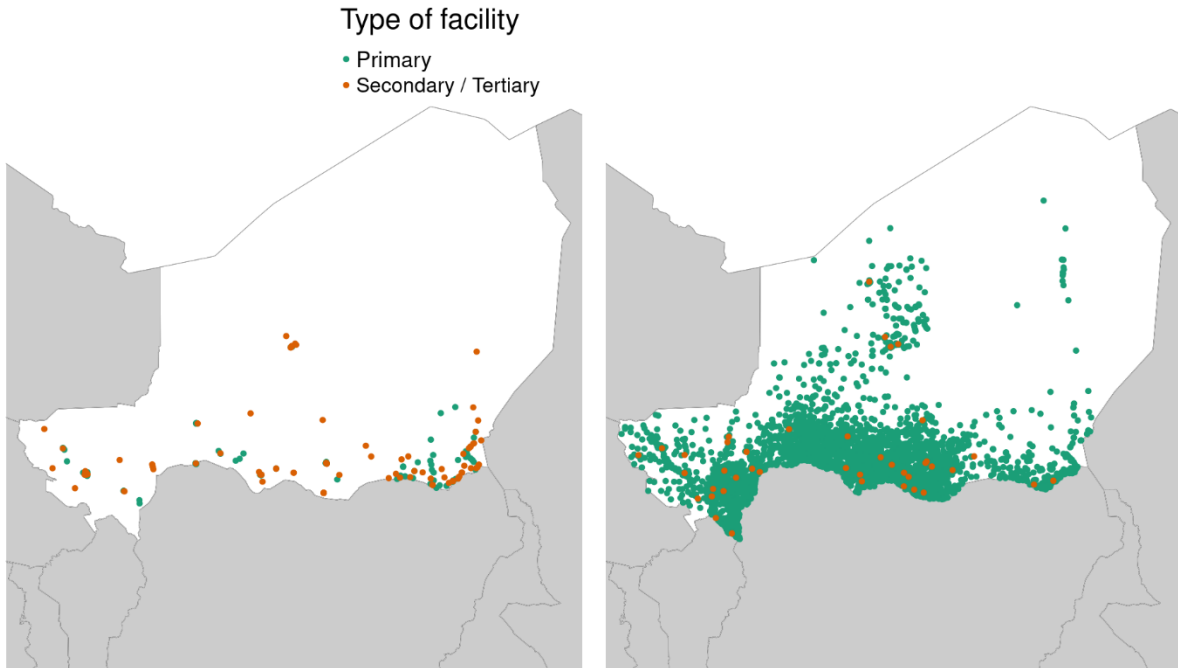

Figure S128. Location of healthcare facilities in OSM and MFL data for Nigeria

OSM data

MFL data

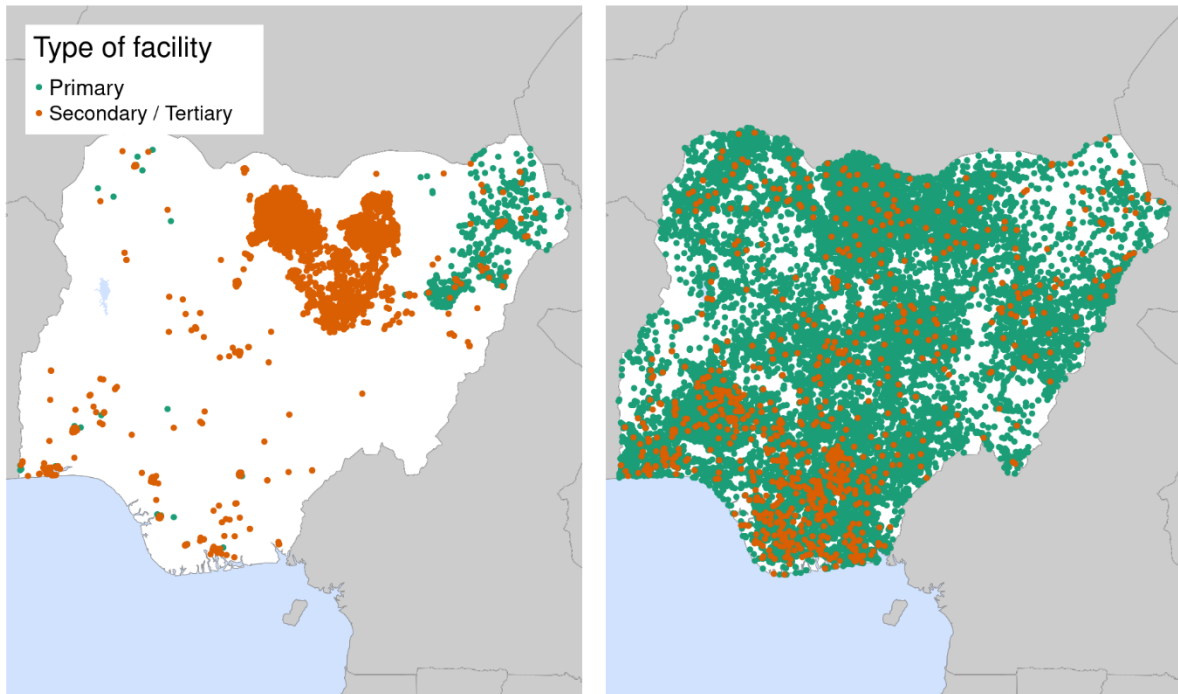

Figure S129. Location of healthcare facilities in OSM and MFL data for Republic of the Congo

OSM data

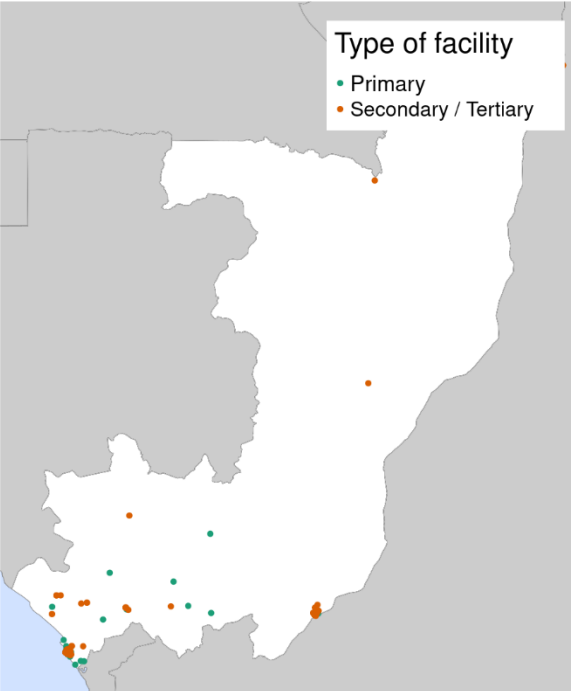

MFL data

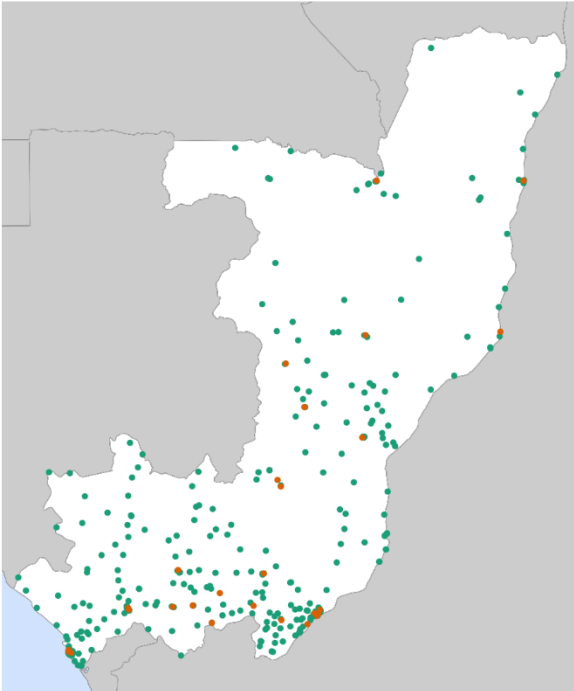

Figure S130. Location of healthcare facilities in OSM and MFL data for Rwanda

OSM data

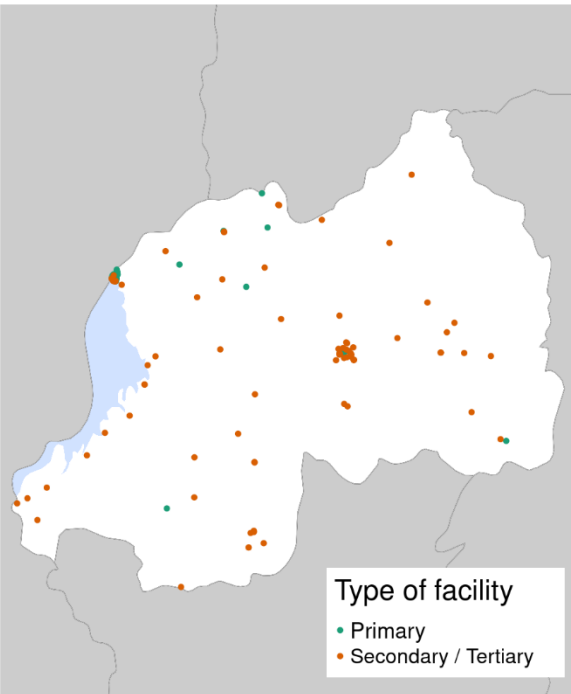

MFL data

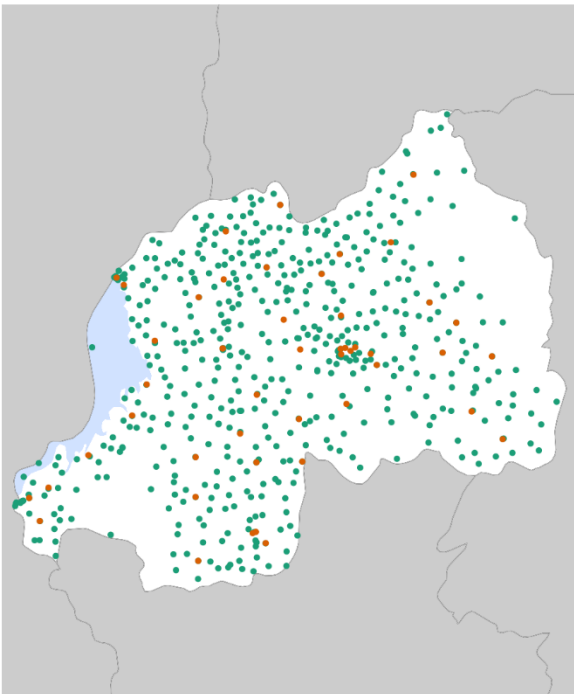

Figure S131. Location of healthcare facilities in OSM and MFL data for Senegal

OSM data

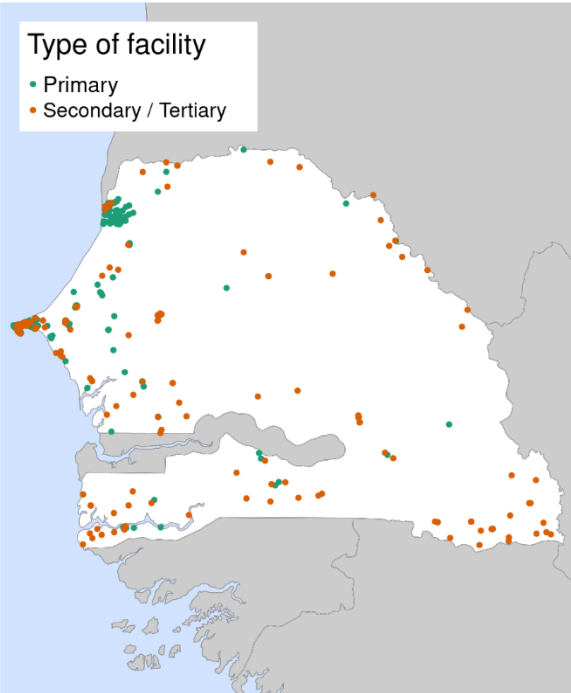

MFL data

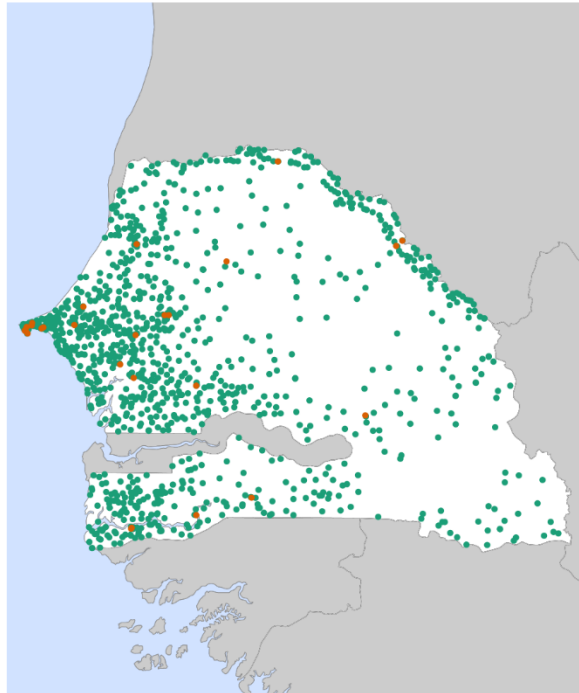

Figure S132. Location of healthcare facilities in OSM and MFL data for Sierra Leone

OSM data

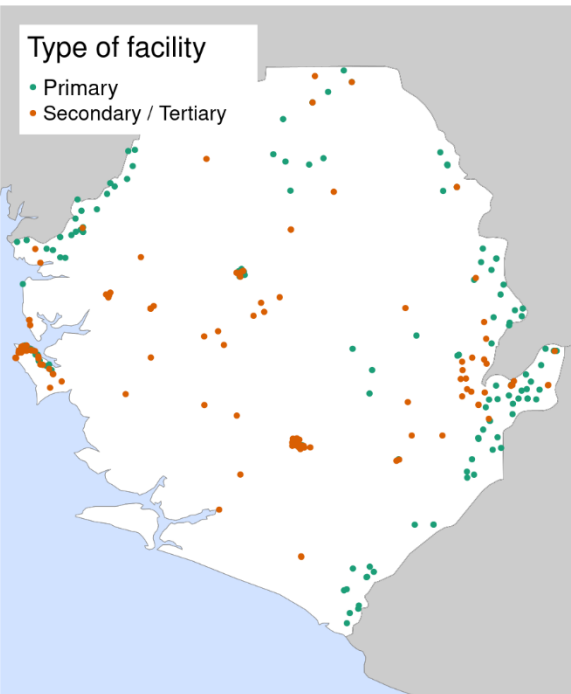

MFL data

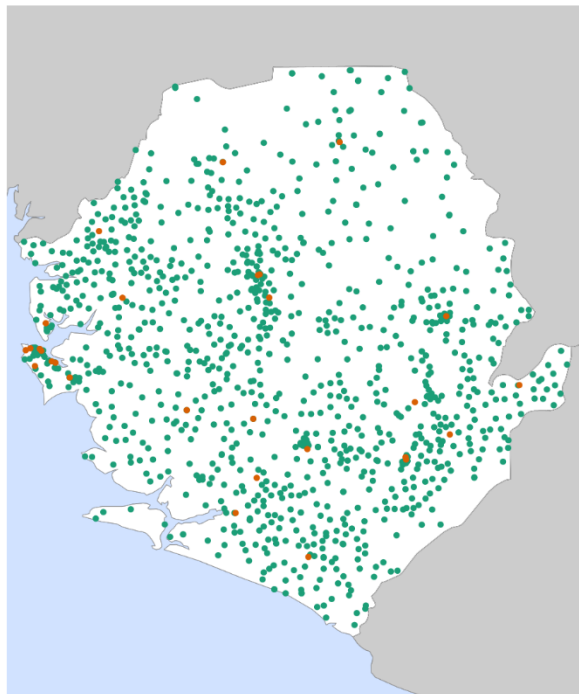

Figure S133. Location of healthcare facilities in OSM and MFL data for Somalia

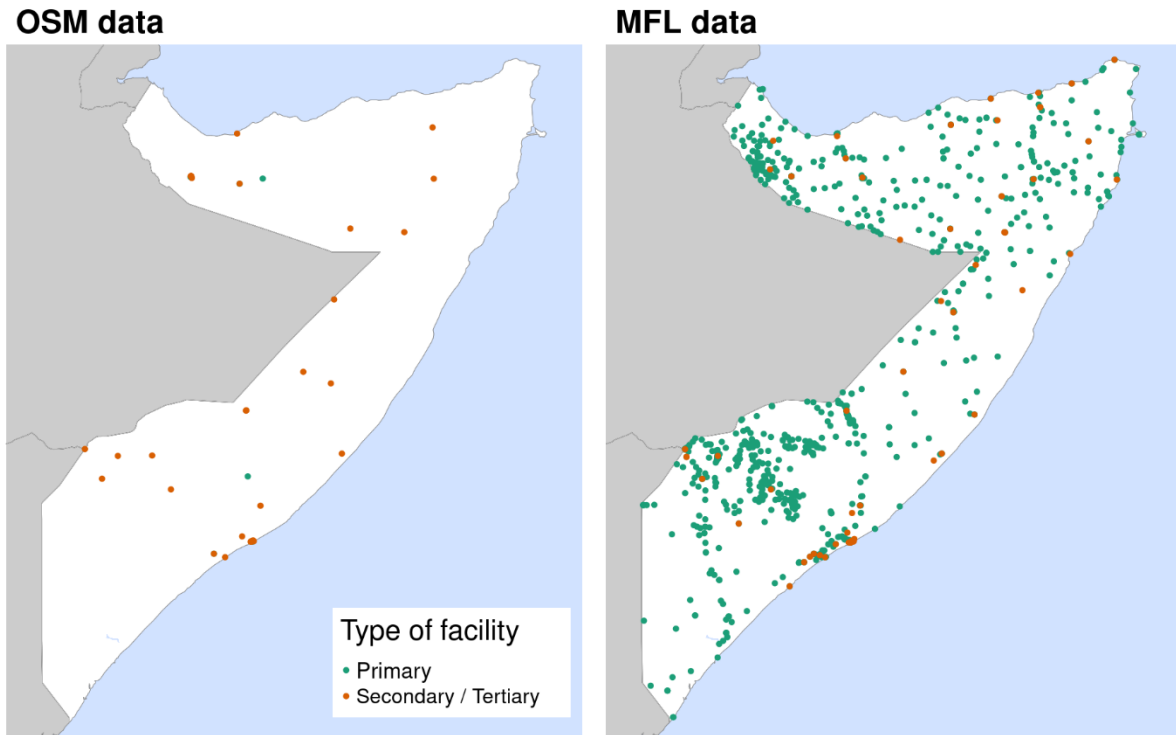

Figure S134. Location of healthcare facilities in OSM and MFL data for South Africa

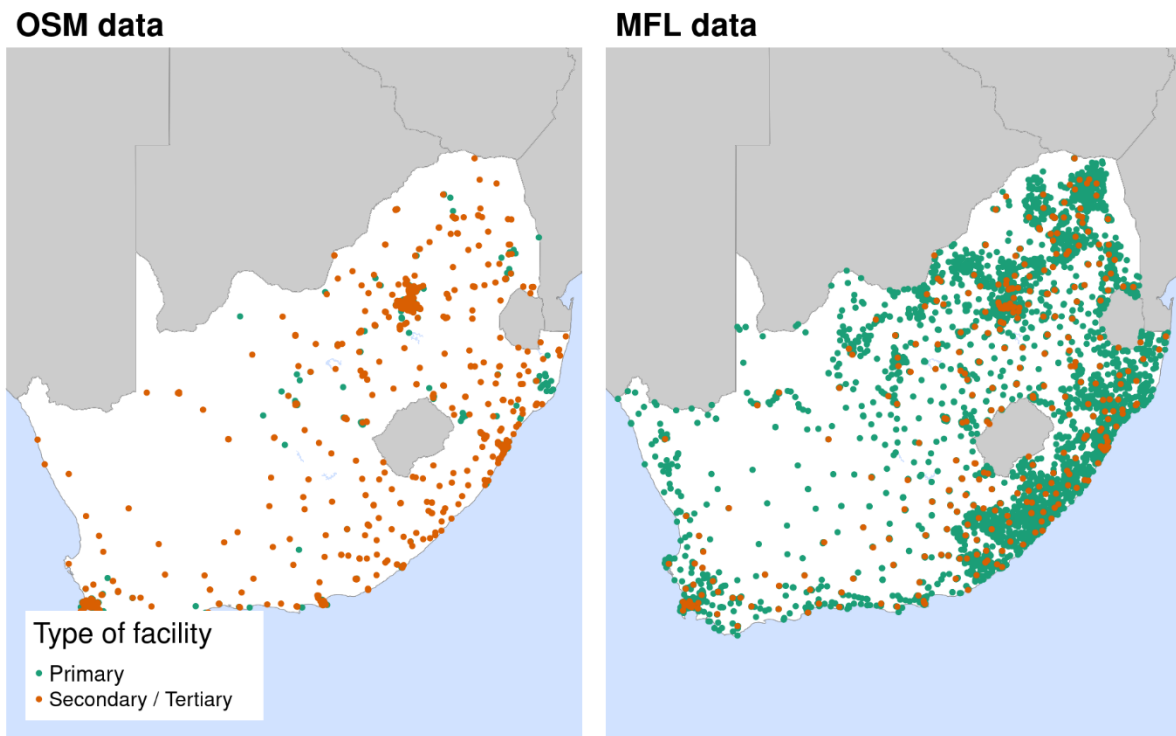

Figure S135. Location of healthcare facilities in OSM and MFL data for South Sudan

**OSM data**

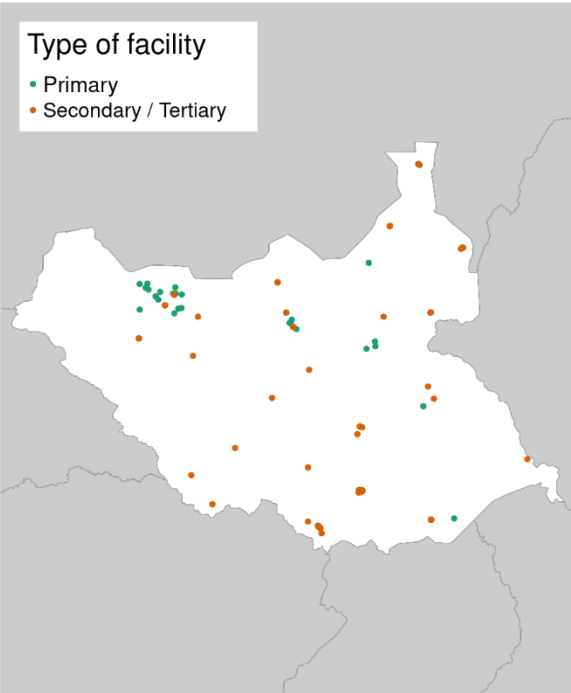

**MFL data**

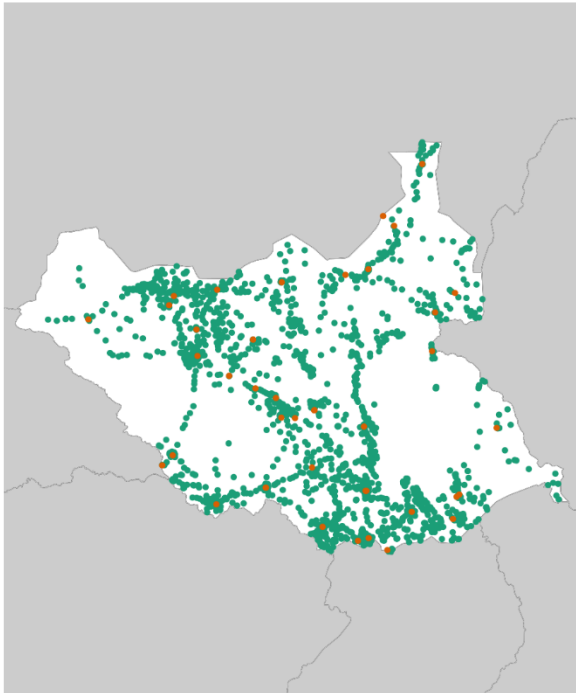

Figure S136. Location of healthcare facilities in OSM and MFL data for Sudan

**OSM data**

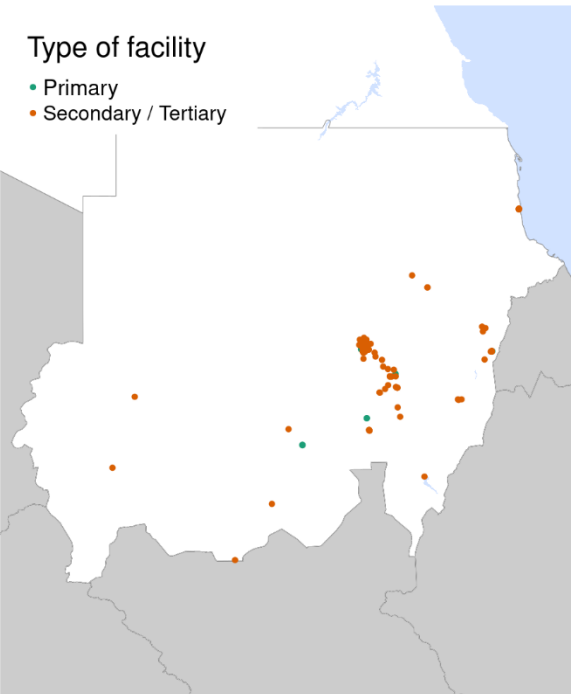

**MFL data**

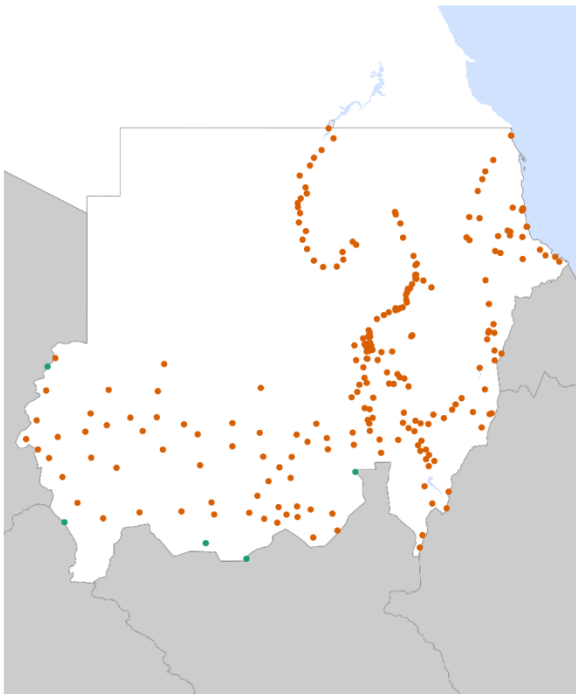

Figure S137. Location of healthcare facilities in OSM and MFL data for Tanzania

OSM data

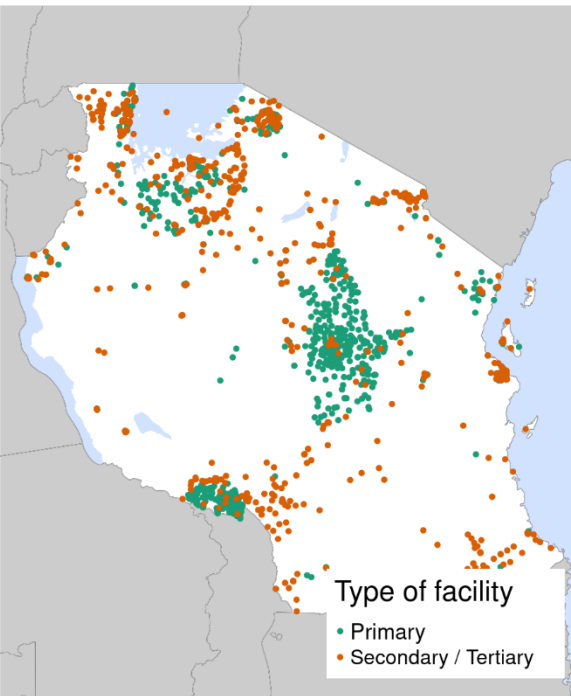

MFL data

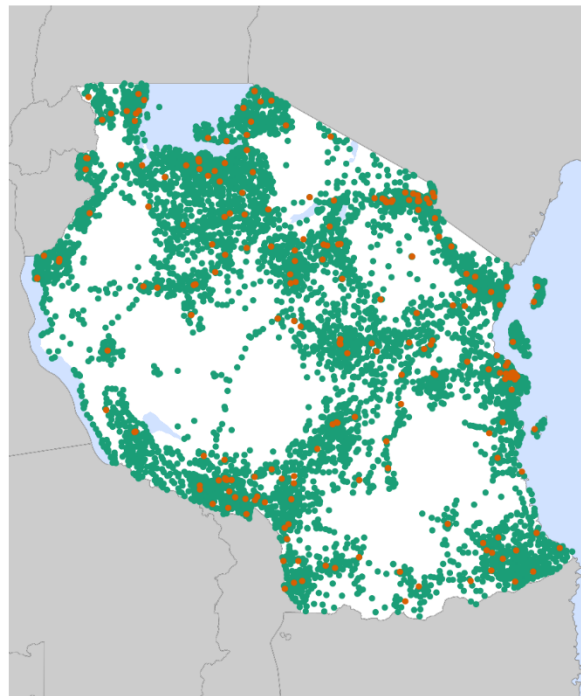

Figure S138. Location of healthcare facilities in OSM and MFL data for The Gambia

OSM data

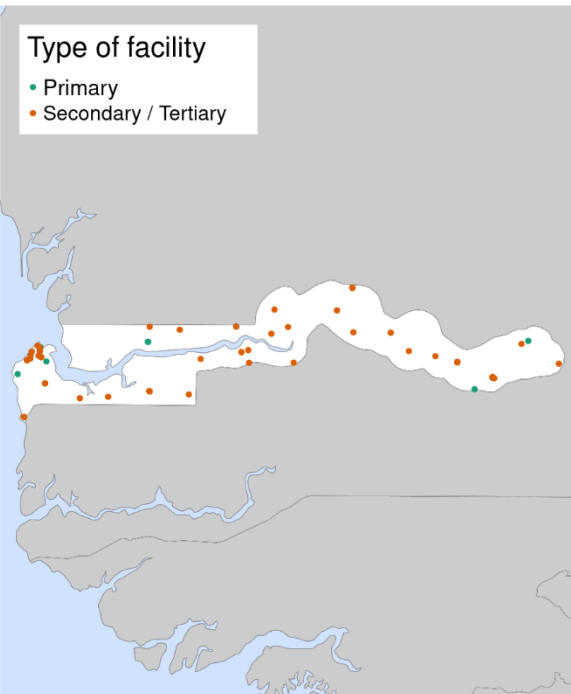

MFL data

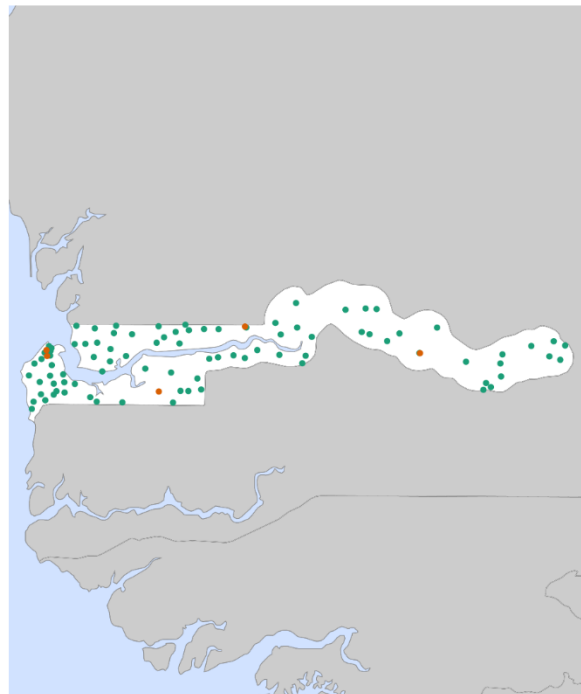

Figure S139. Location of healthcare facilities in OSM and MFL data for Togo

**OSM data**

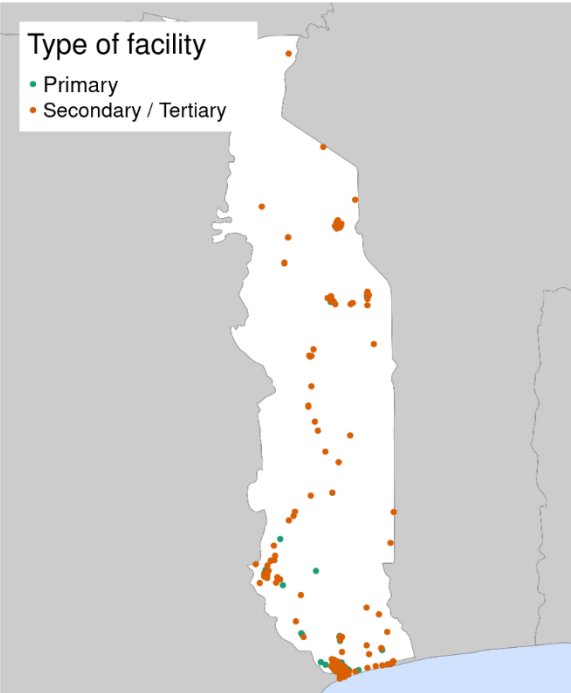

**MFL data**

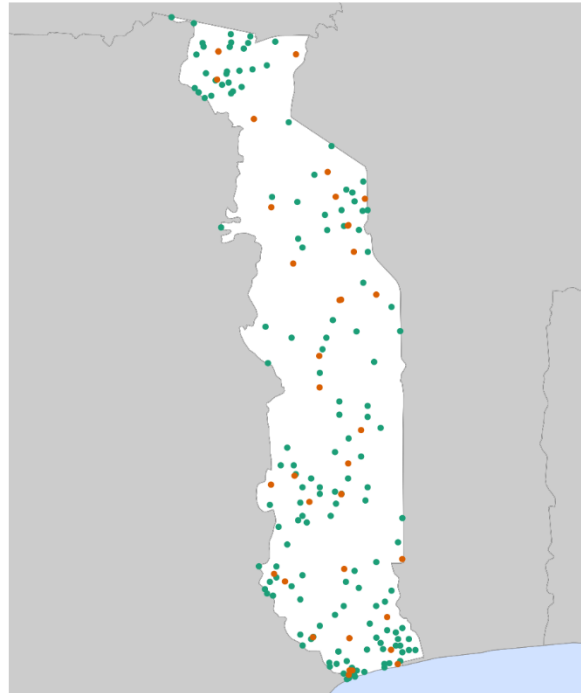

Figure S140. Location of healthcare facilities in OSM and MFL data for Uganda

**OSM data**

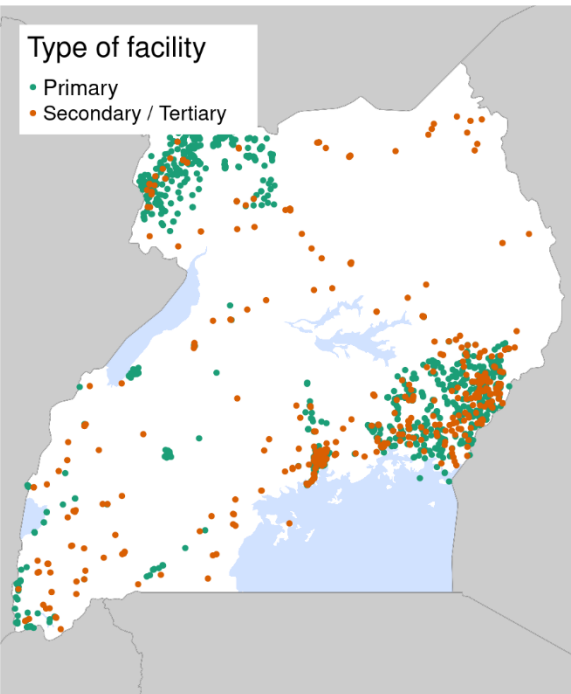

**MFL data**

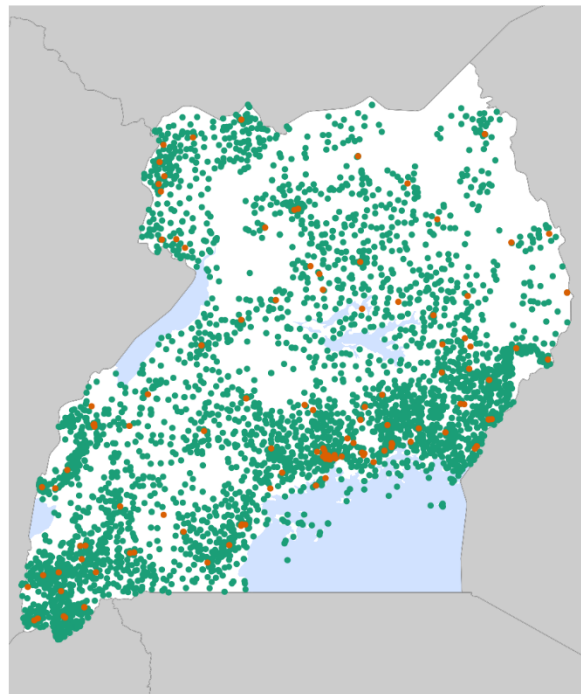



Figure S141. Location of healthcare facilities in OSM and MFL data for Zambia

OSM data

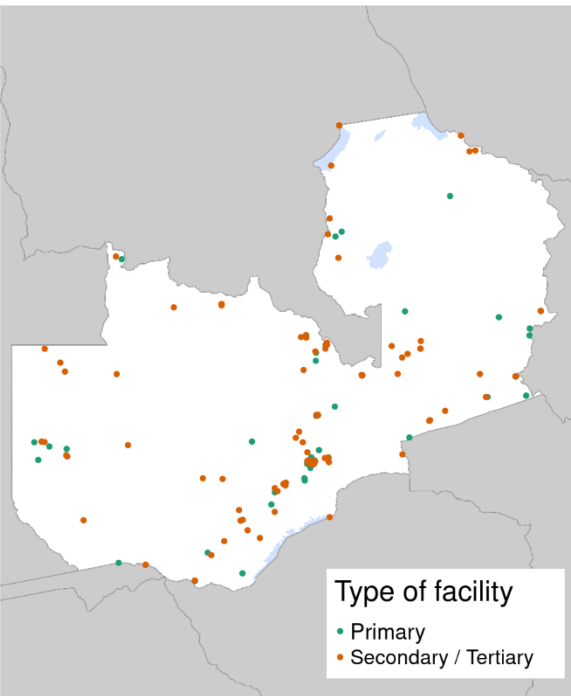

MFL data

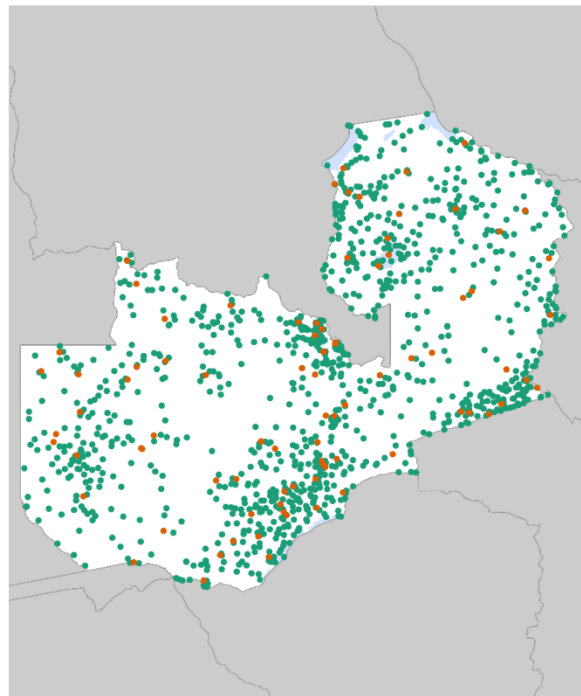

Figure S142. Location of healthcare facilities in OSM and MFL data for Zimbabwe

OSM data

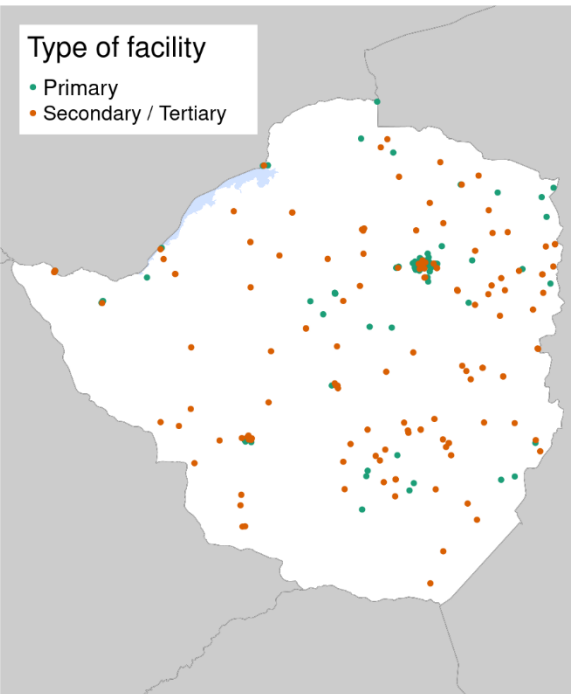

MFL data

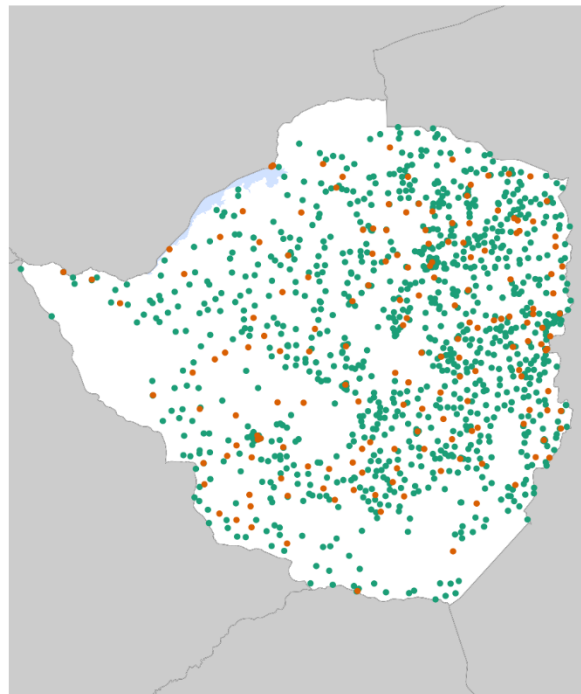

**Table S1. Overlap of the GPS location of healthcare facilities with a building footprint and settlement locations in Bing satellite imagery**

| Dataset      | Facility type | Facilities examined | Overlap <sup>1</sup> with building footprint |       | No overlap but near to a settlement <sup>2</sup> |       | No overlap and not near to a settlement <sup>2</sup> |       |
|--------------|---------------|---------------------|----------------------------------------------|-------|--------------------------------------------------|-------|------------------------------------------------------|-------|
|              |               |                     | <i>N</i>                                     | %     | <i>N</i>                                         | %     | <i>N</i>                                             | %     |
| OSM          | Primary care  | 80                  | 66                                           | 82.5% | 13                                               | 16.3% | 1                                                    | 1.3%  |
| OSM          | Hospital      | 80                  | 68                                           | 85.0% | 10                                               | 12.5% | 2                                                    | 2.5%  |
| MFL          | Primary care  | 80 <sup>3</sup>     | 47                                           | 60.3% | 20                                               | 25.6% | 11                                                   | 14.1% |
| MFL          | Hospital      | 80 <sup>3</sup>     | 53                                           | 68.0% | 16                                               | 20.1% | 9                                                    | 11.5% |
| <i>Total</i> | -             | 320                 | 234                                          | 74.1% | 59                                               | 18.7% | 23                                                   | 7.3%  |

<sup>1</sup> Overlap with a building footprint was defined as a building being visible within a five meter radius around the GPS location of the healthcare facility.

<sup>2</sup> “Near to a settlement” was defined as being within 1,000m of a settlement.

<sup>3</sup> We were unable to conduct this validity exercise for four healthcare facilities (two primary care facilities and two hospitals in MFL data) because the satellite image was either covered by clouds or of insufficient resolution.

**Table S2. Travel time estimates from OpenRouteService versus Google Maps for each of 40 randomly selected locations in sub-Saharan Africa**

| Any healthcare facility |                       | Hospitals             |                       |
|-------------------------|-----------------------|-----------------------|-----------------------|
| <i>Google Maps</i>      | <i>ORS</i>            | <i>Google Maps</i>    | <i>ORS</i>            |
| <i>No. of minutes</i>   | <i>No. of minutes</i> | <i>No. of minutes</i> | <i>No. of minutes</i> |
| 25                      | 23                    | 9                     | 16                    |
| 91                      | 105                   | 18                    | 18                    |
| NA                      | 47                    | NA                    | 24                    |
| 50                      | 97                    | 21                    | 44                    |
| NA                      | 268                   | 4                     | 18                    |
| 12                      | 11                    | 12                    | 11                    |
| 78                      | 79                    | 23                    | 20                    |
| 25                      | 27                    | 7                     | 12                    |
| 115                     | 102                   | 6                     | 8                     |
| 25                      | 68                    | 16                    | 32                    |
| 21                      | 28                    | 1                     | 3                     |
| 34                      | 55                    | 21                    | 42                    |
| 43                      | 37                    | 7                     | 12                    |
| 12                      | 19                    | 5                     | 14                    |
| 54                      | 59                    | 54                    | 59                    |
| 26                      | 24                    | 10                    | 8                     |
| 34                      | 36                    | 15                    | 23                    |
| 23                      | 32                    | 19                    | 26                    |
| 30                      | 31                    | 30                    | 31                    |
| NA                      | 330                   | NA                    | 171                   |
| 65                      | 125                   | 18                    | 45                    |
| 82                      | 91                    | 43                    | 42                    |
| 154                     | 111                   | 61                    | 78                    |
| 39                      | 72                    | 32                    | 53                    |
| NA                      | 16                    | NA                    | 16                    |
| 51                      | 72                    | 14                    | 24                    |
| NA                      | 421                   | NA                    | 74                    |
| 28                      | 23                    | 14                    | 12                    |
| NA                      | 44                    | NA                    | 28                    |
| 26                      | 22                    | 4                     | 6                     |
| 121                     | 132                   | 93                    | 112                   |
| 104                     | 66                    | 61                    | 37                    |
| 10                      | 19                    | 8                     | 9                     |
| 32                      | 52                    | 18                    | 36                    |
| 58                      | 38                    | 58                    | 38                    |

|      |      |     |      |
|------|------|-----|------|
| 41   | 59   | 27  | 38   |
| 84   | 77   | 4   | 6    |
| 15   | 19   | 15  | 19   |
| 147  | 144  | 16  | 18   |
| 38   | 42   | 31  | 19   |
| 1793 | 3123 | 795 | 1302 |

Abbreviations: ORS=OpenRouteService

NA = Google Maps did not detect any road near to this location and did, thus, not provide a travel time estimate.

**Table S3. Jaccard Index for OSM primary care facilities and MFL primary care facilities<sup>1</sup>**

| Country <sup>2</sup>     | Radius |       |
|--------------------------|--------|-------|
|                          | 500m   | 1000m |
| DRC                      | 0.356  | 1.237 |
| Mozambique               | 0.354  | 0.403 |
| Mali                     | 0.320  | 0.995 |
| Senegal                  | 0.296  | 0.868 |
| Uganda                   | 0.251  | 0.716 |
| Republic of the Congo    | 0.216  | 0.620 |
| Rwanda                   | 0.199  | 0.514 |
| Tanzania                 | 0.168  | 0.356 |
| Djibouti                 | 0.161  | 0.286 |
| Guinea                   | 0.160  | 0.408 |
| Gabon                    | 0.153  | 0.419 |
| Kenya                    | 0.152  | 0.399 |
| Botswana                 | 0.144  | 0.420 |
| Ethiopia                 | 0.142  | 0.483 |
| Burkina Faso             | 0.133  | 0.244 |
| Liberia                  | 0.126  | 0.200 |
| Ivory Coast              | 0.121  | 0.422 |
| Cameroon                 | 0.117  | 0.407 |
| Benin                    | 0.091  | 0.376 |
| Sierra Leone             | 0.083  | 0.138 |
| Ghana                    | 0.073  | 0.164 |
| Chad                     | 0.069  | 0.156 |
| Namibia                  | 0.065  | 0.122 |
| Niger                    | 0.060  | 0.141 |
| South Africa             | 0.054  | 0.120 |
| The Gambia               | 0.049  | 0.127 |
| eSwatini                 | 0.046  | 0.077 |
| Lesotho                  | 0.045  | 0.116 |
| Mauritania               | 0.038  | 0.127 |
| Zimbabwe                 | 0.033  | 0.073 |
| Central African Republic | 0.029  | 0.059 |
| Malawi                   | 0.028  | 0.048 |
| Togo                     | 0.025  | 0.100 |
| Burundi                  | 0.023  | 0.073 |
| Madagascar               | 0.020  | 0.063 |

|                   |       |       |
|-------------------|-------|-------|
| Nigeria           | 0.017 | 0.030 |
| South Sudan       | 0.016 | 0.030 |
| Angola            | 0.014 | 0.023 |
| Zambia            | 0.008 | 0.017 |
| Eritrea           | 0.008 | 0.028 |
| Somalia           | 0.004 | 0.033 |
| Equatorial Guinea | 0.000 | 0.067 |
| Guinea-Bissau     | 0.000 | 0.000 |
| Sudan             | 0.000 | 0.000 |

<sup>1</sup> When interpreting the Jaccard Indices, it has to be born in mind that indices above one are possible because a healthcare facility in one dataset was judged to overlap with a facility in the other dataset if their GPS locations fall within a certain radius of each other. As such, duplicates are possible.

<sup>2</sup> Countries were sorted in descending order for the Jaccard Index with a perimeter of 500m.

**Table S4. Jaccard Index for OSM hospitals and MFL hospitals<sup>1</sup>**

| <b>Country<sup>2</sup></b> | <b>Radius</b> |              |
|----------------------------|---------------|--------------|
|                            | <b>500m</b>   | <b>1000m</b> |
| Sudan                      | 0.492         | 1.016        |
| Ethiopia                   | 0.385         | 0.950        |
| Djibouti                   | 0.385         | 0.846        |
| Rwanda                     | 0.369         | 0.492        |
| Namibia                    | 0.367         | 0.475        |
| Guinea-Bissau              | 0.346         | 0.423        |
| Botswana                   | 0.333         | 0.343        |
| eSwatini                   | 0.323         | 0.452        |
| Chad                       | 0.320         | 0.594        |
| South Africa               | 0.300         | 0.396        |
| Eritrea                    | 0.282         | 0.513        |
| Malawi                     | 0.282         | 0.336        |
| Tanzania                   | 0.274         | 0.442        |
| Angola                     | 0.269         | 0.612        |
| Somalia                    | 0.265         | 0.735        |
| Ghana                      | 0.258         | 0.393        |
| Kenya                      | 0.253         | 0.473        |
| Madagascar                 | 0.245         | 0.666        |
| Lesotho                    | 0.241         | 0.397        |
| Guinea                     | 0.218         | 0.331        |
| Republic of the Congo      | 0.202         | 0.474        |
| Mozambique                 | 0.201         | 0.273        |
| South Sudan                | 0.193         | 0.339        |
| Ivory Coast                | 0.192         | 0.327        |
| Senegal                    | 0.171         | 0.332        |
| Mali                       | 0.165         | 0.386        |
| Zimbabwe                   | 0.160         | 0.245        |
| Cameroon                   | 0.155         | 0.404        |
| Benin                      | 0.153         | 0.363        |
| Liberia                    | 0.143         | 0.262        |
| Uganda                     | 0.142         | 0.372        |
| Togo                       | 0.134         | 0.378        |
| Burundi                    | 0.122         | 0.212        |
| DRC                        | 0.114         | 0.312        |
| Burkina Faso               | 0.079         | 0.159        |

|                          |       |       |
|--------------------------|-------|-------|
| The Gambia               | 0.079 | 0.190 |
| Sierra Leone             | 0.075 | 0.225 |
| Zambia                   | 0.073 | 0.124 |
| Central African Republic | 0.056 | 0.110 |
| Equatorial Guinea        | 0.053 | 0.053 |
| Niger                    | 0.052 | 0.078 |
| Nigeria                  | 0.048 | 0.105 |
| Gabon                    | 0.041 | 0.219 |
| Mauritania               | 0.034 | 0.079 |

<sup>1</sup> When interpreting the Jaccard Indices, it has to be born in mind that indices above one are possible because a healthcare facility in one dataset was judged to overlap with a facility in the other dataset if their GPS locations fall within a certain radius of each other. As such, duplicates are possible.

<sup>2</sup> Countries were sorted in descending order for the Jaccard Index with a perimeter of 500m.



**Table S5. Jaccard Index for OSM primary care facilities and MFL hospitals<sup>1</sup>**

| <b>Country<sup>2</sup></b> | <b>Radius</b> |              |
|----------------------------|---------------|--------------|
|                            | <b>500m</b>   | <b>1000m</b> |
| Djibouti                   | 0.579         | 1.158        |
| Gabon                      | 0.276         | 0.565        |
| Ethiopia                   | 0.239         | 0.845        |
| Namibia                    | 0.224         | 0.365        |
| Rwanda                     | 0.194         | 0.476        |
| Cameroon                   | 0.168         | 0.531        |
| Sudan                      | 0.144         | 0.294        |
| Benin                      | 0.131         | 0.462        |
| Republic of the Congo      | 0.130         | 0.454        |
| Madagascar                 | 0.125         | 0.477        |
| Kenya                      | 0.123         | 0.294        |
| Senegal                    | 0.123         | 0.502        |
| Mauritania                 | 0.122         | 0.143        |
| Lesotho                    | 0.118         | 0.176        |
| Chad                       | 0.112         | 0.249        |
| Ivory Coast                | 0.098         | 0.333        |
| Uganda                     | 0.095         | 0.359        |
| Togo                       | 0.093         | 0.364        |
| Eritrea                    | 0.091         | 0.136        |
| Tanzania                   | 0.088         | 0.246        |
| Liberia                    | 0.088         | 0.264        |
| Burundi                    | 0.085         | 0.239        |
| eSwatini                   | 0.083         | 0.167        |
| Ghana                      | 0.074         | 0.230        |
| Guinea                     | 0.069         | 0.174        |
| Botswana                   | 0.065         | 0.222        |
| Mali                       | 0.065         | 0.181        |
| The Gambia                 | 0.063         | 0.125        |
| Angola                     | 0.058         | 0.199        |
| Guinea-Bissau              | 0.053         | 0.158        |
| Somalia                    | 0.050         | 0.263        |
| Zambia                     | 0.047         | 0.067        |
| South Africa               | 0.041         | 0.122        |
| DRC                        | 0.037         | 0.153        |
| Mozambique                 | 0.036         | 0.051        |

|                          |       |       |
|--------------------------|-------|-------|
| Sierra Leone             | 0.034 | 0.085 |
| Niger                    | 0.031 | 0.108 |
| Nigeria                  | 0.028 | 0.060 |
| South Sudan              | 0.026 | 0.078 |
| Burkina Faso             | 0.020 | 0.065 |
| Zimbabwe                 | 0.011 | 0.030 |
| Central African Republic | 0.000 | 0.054 |
| Equatorial Guinea        | 0.000 | 0.000 |
| Malawi                   | 0.000 | 0.059 |

<sup>1</sup> When interpreting the Jaccard Indices, it has to be born in mind that indices above one are possible because a healthcare facility in one dataset was judged to overlap with a facility in the other dataset if their GPS locations fall within a certain radius of each other. As such, duplicates are possible.

<sup>2</sup> Countries were sorted in descending order for the Jaccard Index with a perimeter of 500m.

**Table S6. Jaccard Index for OSM hospitals and MFL primary care facilities<sup>1</sup>**

| <b>Country<sup>2</sup></b> | <b>Radius</b> |              |
|----------------------------|---------------|--------------|
|                            | <b>500m</b>   | <b>1000m</b> |
| Burundi                    | 0.623         | 0.947        |
| DRC                        | 0.439         | 1.559        |
| Djibouti                   | 0.329         | 0.842        |
| Kenya                      | 0.306         | 0.786        |
| Central African Republic   | 0.265         | 0.380        |
| The Gambia                 | 0.181         | 0.329        |
| Chad                       | 0.172         | 0.437        |
| Ethiopia                   | 0.166         | 0.611        |
| Cameroon                   | 0.156         | 0.453        |
| Benin                      | 0.151         | 0.292        |
| Tanzania                   | 0.146         | 0.369        |
| Senegal                    | 0.145         | 0.383        |
| eSwatini                   | 0.141         | 0.356        |
| Namibia                    | 0.133         | 0.240        |
| Somalia                    | 0.126         | 0.248        |
| Uganda                     | 0.124         | 0.338        |
| Rwanda                     | 0.123         | 0.231        |
| Nigeria                    | 0.122         | 0.242        |
| Republic of the Congo      | 0.122         | 0.519        |
| Burkina Faso               | 0.111         | 0.220        |
| South Africa               | 0.103         | 0.231        |
| Malawi                     | 0.094         | 0.238        |
| Mozambique                 | 0.094         | 0.171        |
| Sierra Leone               | 0.088         | 0.202        |
| Mali                       | 0.077         | 0.279        |
| Guinea                     | 0.076         | 0.162        |
| Eritrea                    | 0.074         | 0.166        |
| Botswana                   | 0.072         | 0.176        |
| Liberia                    | 0.070         | 0.125        |
| Ghana                      | 0.069         | 0.153        |
| Lesotho                    | 0.066         | 0.125        |
| Madagascar                 | 0.061         | 0.159        |
| Togo                       | 0.059         | 0.159        |
| Ivory Coast                | 0.054         | 0.146        |
| Angola                     | 0.048         | 0.132        |

|                   |       |       |
|-------------------|-------|-------|
| Mauritania        | 0.040 | 0.172 |
| Equatorial Guinea | 0.030 | 0.091 |
| Niger             | 0.030 | 0.076 |
| Zimbabwe          | 0.027 | 0.060 |
| South Sudan       | 0.027 | 0.081 |
| Gabon             | 0.016 | 0.090 |
| Zambia            | 0.012 | 0.046 |
| Guinea-Bissau     | 0.000 | 0.000 |
| Sudan             | 0.000 | 0.000 |

<sup>1</sup> When interpreting the Jaccard Indices, it has to be born in mind that indices above one are possible because a healthcare facility in one dataset was judged to overlap with a facility in the other dataset if their GPS locations fall within a certain radius of each other. As such, duplicates are possible.

<sup>2</sup> Countries were sorted in descending order for the Jaccard Index with a perimeter of 500m.
